# Supplementary material for: How do income changes impact on mental health and wellbeing for working-age adults? A systematic review and meta-analysis
Source: PubMed Central journal article supplement (PMC7614874; doi:10.1016/s2468-2667(22)00058-5), 2022-06-01

# THE LANCET

## Public Health

### **Supplementary appendix**

This appendix formed part of the original submission and has been peer reviewed. We post it as supplied by the authors.

Supplement to: Thomson RM, Igelström E, Purba AK, et al. How do income changes impact on mental health and wellbeing for working-age adults? A systematic review and meta-analysis. *Lancet Public Health* 2022; 7: 515–28.

# How do income changes impact on mental health and wellbeing for working-age adults? A systematic review and meta-analysis

Rachel M Thomson, Erik Igelström, Amrit Kaur Purba, Michal Shimonovich, Hilary Thomson, Gerry McCartney, Aaron Reeves, Alastair Leyland, Anna Pearce, S Vittal Katikireddi

## Supplementary Appendices

|                                                                                                                 |     |
|-----------------------------------------------------------------------------------------------------------------|-----|
| Appendix A: Additional information on protocol and process .....                                                | 2   |
| Table A1: Data items extracted from included studies.....                                                       | 6   |
| Appendix B: Details of search strategy .....                                                                    | 14  |
| Appendix C: PRISMA flowchart .....                                                                              | 18  |
| Appendix D: Details of included studies .....                                                                   | 19  |
| List of 136 included studies.....                                                                               | 19  |
| Table D1: Included studies and their characteristics.....                                                       | 28  |
| Table D2: Risk of bias (RoB) domain scores for included non-randomised studies, measured using ROBINS-I.....    | 63  |
| Table D3: Risk of bias (RoB) domain scores for included randomised controlled trials, measured using ROB-2..... | 68  |
| Appendix E: List of studies excluded at full text .....                                                         | 69  |
| Appendix F: Additional tables .....                                                                             | 91  |
| Table F1: Results of meta-regression for all main analyses.....                                                 | 91  |
| Table F2: GRADE summary of findings and certainty of evidence for each outcome domain .....                     | 93  |
| Appendix G: Additional graphs .....                                                                             | 96  |
| Effect direction plots.....                                                                                     | 96  |
| Stratified forest plots for main subgroup analysis.....                                                         | 97  |
| Additional analysis using binary outcomes.....                                                                  | 119 |
| Sensitivity analysis excluding calculations which used an external standard deviation .....                     | 120 |
| Funnel plots and Egger's test investigating publication bias/small study effect.....                            | 123 |

## Appendix A: Additional information on protocol and process

### **Clarifications to and deviations from protocol as published**

1. Clarified that books and book chapters were excluded
2. Clarified that exposures of interest should represent changes in *absolute* rather than relative income (the only exception to this was movements into/out of poverty, due to research interest in the threshold effect of this transition)
3. Clarified that changes in subjective financial strain/stress alone were not considered appropriate exposures where it was unclear whether these were accompanied by absolute income change
4. Clarified that studies of universal basic income/minimum income guarantee interventions were eligible for inclusion when they included a comparison between those who did and did not experience an income change following the introduction of the intervention
5. Clarified that health-related quality of life measures were excluded
6. Clarified that psychological variables (e.g. self-efficacy) were excluded
7. Clarified that area-level outcomes (e.g. suicide rates) were excluded
8. As more studies than expected considered binary exposures we were able to meta-analyse these, and therefore took the decision (based on existing literature) to consider increases and decreases separately, and to consider transitions into/out of poverty within subgroup analysis
9. Meta-regression rather than subgroup analysis was used as the main approach to investigate effect modification after separating out continuous/binary increase/binary decrease exposures – it had been intended a priori that the analysis would include some element of meta-regression if possible, but it was not anticipated there would be sufficient datapoints to do this to the extent to which we were able
10. GRADE certainty assessments were not reported for two pre-specified critical outcomes (mental health/wellbeing outcomes secondary to changes in unearned income) due to the structure of extracted data, with most analyses including *only* changes in either earned or unearned income

### **Assignment of outcomes to mental health vs wellbeing domain**

Outcomes which were indicators of serious mental illness (e.g. psychosis), common mental health problems (e.g. depression, anxiety) or general mental health (e.g. self-harm, composite symptom scores such as SF-12) were grouped into the mental health domain. Mental health outcomes measured at area-level (e.g. suicide rates) and outcomes related to substance use were not eligible for inclusion. Outcomes which were indicators of life satisfaction, happiness, or quality of life were grouped into the wellbeing domain.

Primary allocation of outcomes to domains occurred at data extraction and was subsequently independently checked by a second reviewer, with any unclear decisions resolved by consensus. In one study (Chin 2018) an outcome nominally described as a quality of life measure (the Taiwanese version of WHOQOL-BREF) was categorised as a mental health measure, as the outcome extracted was the psychological domain score only, rather than the overall quality of life score.

### **Decision rules for selecting between studies with overlapping data**

These questions were designed to assess both the closeness to our study PECOS and also a crude assessment of risk of bias.

#### **Most important criteria (given equal weight)**

- How large is the sample size?
- Does the study report longitudinal rather than cross-sectional data?

- Do the research question(s) and sample correspond well to our own:
  - In terms of the included population?
  - In terms of the exposure/outcome combination?
- How well does the study address confounding in relation to our research question in its design and analysis?
- How well would the data reported facilitate inclusion in a meta-analysis?
- Is the study peer-reviewed?

Remaining criteria to be used if no clear decision after applying the above (in order of importance)

- How recent are the data used?
- How many years of data does the study use, if longitudinal?

### **Decision rules for selecting which outcome measure to include from a study with multiple options**

Where studies report more than one mental health outcome:

1. Use validated rather than subjective/unvalidated measure if available
2. Use measures of depression (most common) where more than one option

Where studies report more than one wellbeing measure:

1. Use validated rather than subjective/unvalidated measure if available
2. Use measures of life satisfaction (most common) where more than one option

Where multiple measures of an outcome are reported:

1. Use last occasion measured UNLESS this occurs after the intervention could conceivably have exerted its main effect on our outcome of interest
2. In the latter case, opt for the measurement closest to the end of the intervention

### **Further detail on process for assessing risk of bias**

Key confounders for ROBINS-I were determined a priori: age, sex, ethnicity, other measures of socioeconomic position excluding income (e.g. educational attainment, area-level deprivation, benefit status, housing tenure), employment status, household composition, physical health, and past mental health. Where multiple adjusted effect estimates were reported in a study, the estimate which most closely matched our ideal confounding strategy was selected. As some of our identified key confounders could also function as mediators if they occurred after the exposure of interest, the timing of measurement was also taken into account in ROBINS assessment under the confounding domain.

Anticipated common co-interventions which could differ between intervention groups, and therefore impact on outcomes, were also listed a priori. Examples included: any direct protective effects of secure employment vs insecure employment vs unemployment on mental health; any mental health effects of conditions attached to a policy e.g. conditional cash transfers; increased or decreased access to healthcare e.g. through work-related insurance; contemporaneous policy changes which did not impact on income but may have impacted on mental health outcomes e.g. housing quality standards.

Each non-randomised study (NRS) was scored across the seven ROBINS-I domains (confounding, selection, classification, deviations, missingness, outcome measurement, and reporting) in



accordance with the ROBINS-I detailed guidance.<sup>1</sup> The overall score for the study was taken from the highest/most biased domain-level RoB rating. In interpreting ROBINS-I ratings, a 'low' overall rating is considered comparable to a well-conducted RCT in assessing the true effect of the intervention, whereas a 'moderate' rating indicates that the study is sound for an NRS, but cannot be considered comparable to an RCT. A 'serious' rating indicates that the study has some important problems in a domain (for example, the omission of any pre-specified key confounder from analysis), but may still provide useful information for synthesis. In contrast, a 'critical' rating indicates that a study is too problematic in a domain to provide any useful evidence on the effect of interest (for example, a judgement that due to the study design or analytical choices confounding was 'inherently not controllable').

When stratifying analysis by RoB, RCTs rated 'some concerns' on RoB-2 were grouped with 'moderate' NRSs and 'high' RCTs were grouped with 'serious' NRSs. The percentage agreement for RoB assessment was 60.3%.

### **Process for data transformations for meta-analysis**

All data transformations were conducted according to guidance within the Cochrane Handbook<sup>2</sup> and, where necessary, using an online effect size calculator by The Campbell Collaboration.<sup>3</sup> For binary/dichotomous exposure measurements, continuous and dichotomous outcome data were combined. We opted to report these as standardised mean differences (SMDs) as most outcomes were originally reported on continuous scales, and therefore fewer assumptions were made when completing the conversions. This meant that where studies reported on the same outcome measure both continuously and using a binary 'cut-off', we utilised the former estimate in our synthesis. For continuous exposure measurements – which are rarely reported in systematic reviews, meaning best practice recommendations are not available within the Cochrane Handbook – we opted *not* to combine continuous and dichotomous outcome data. This decision was taken (after discussion with systematic review and statistical experts) because the common statistical methods available to combine these are based on the ability to make direct comparisons between two distinct exposed and unexposed groups, and we therefore did not feel it was appropriate or interpretable to utilise these for continuous exposures. Instead, we pooled these data separately as either standardised beta coefficients or odds ratios.

Where studies reported that a p-value was <0.05 without reporting the exact value and this was required to determine the standard error of an estimate, the p-value was conservatively assumed to be 0.05 as per Cochrane to facilitate inclusion in meta-analysis. Where studies reported probit rather than logit coefficients, these were multiplied by 1.81 prior to conversion to SMD.<sup>4</sup> Where studies reported the output of a linear probability model (i.e., the percentage point difference in prevalence of a binary outcome between exposure groups), where possible SMDs were approximated by applying this absolute difference to an estimate of prevalence in the study control group if this was reported. Where studies using longitudinal data reported only the number of person-year

---

<sup>1</sup> Sterne JAC, Higgins JPT, Elbers RG, Reeves BC and the development group for ROBINS-I. Risk Of Bias In Non-randomized Studies of Interventions (ROBINS-I): detailed guidance, updated 12 October 2016

<sup>2</sup> Higgins JPT, Thomas J, Chandler J, Cumpston M, Li T, Page MJ, Welch VA (editors). Cochrane Handbook for Systematic Reviews of Interventions version 6.2 (updated February 2021). Cochrane, 2021. Available from [www.training.cochrane.org/handbook](http://www.training.cochrane.org/handbook).

<sup>3</sup> <https://www.campbellcollaboration.org/escalc/html/EffectSizeCalculator-Home.php>

<sup>4</sup> <https://aniruhil.github.io/avsr/teaching/mpa6020/LogitandProbitModels2.html>

observations without including the number of individuals, this was conservatively estimated by dividing the number of observations by the number of waves of data.

Study investigators were contacted by email where data were insufficiently reported for standardisation or transformation, and in a small number of cases (n=7) we utilised variance/standard deviations reported in other included studies for common outcome measures where these were not reported for the study sample. We performed sensitivity analysis excluding these studies to ensure this did not bias our findings.

### **Planned meta-analyses which could not be completed due to insufficient data**

1. For binary income decreases and mental health outcomes (Figure 3B), could not stratify by study design, socioeconomic position, poverty transitions or setting
2. For continuous income changes and continuous mental health outcomes (Figure 3C), could not stratify by risk of bias, study design, poverty transitions or setting
3. For continuous income changes and binary mental health outcomes (Figure G22), could not stratify by risk of bias, study design, socioeconomic position, poverty transitions, setting or age
4. For binary income decreases and wellbeing outcomes there were insufficient studies to complete any primary meta-analysis
5. For continuous income changes and continuous wellbeing outcomes (Figure 4B), could not stratify by risk of bias, study design, socioeconomic position, poverty transitions or setting
6. For continuous income changes and binary wellbeing outcomes there were insufficient studies to complete any meta-analysis
7. Meta-regression could not be completed for any analysis of continuous income changes as these included fewer than 10 studies

**Table A1: Data items extracted from included studies**

| STUDY LEVEL VARIABLES  |                                                             |                                                                    |                                                        |
|------------------------|-------------------------------------------------------------|--------------------------------------------------------------------|--------------------------------------------------------|
| Field                  | Brief description                                           | Guidance                                                           | Required format/permissible entries                    |
| <b>source</b>          | Where did we find the study?                                | If this is a relevant study screened in Covidence                  | Cov                                                    |
|                        |                                                             | If this is a relevant study identified in a Systematic Review      | SR                                                     |
|                        |                                                             | If this is a relevant study identified from another included study | INT                                                    |
|                        |                                                             | If this is a relevant study identified from another source         | EXT                                                    |
| <b>source2</b>         | If relevant, which other paper was the source of the study? | Source = Covidence i.e. initial searches                           | n/a                                                    |
|                        |                                                             | Source = Systematic Review                                         | First author surname and year of publication           |
|                        |                                                             | Source = another included study                                    | Internal reference name of that paper ('study' column) |
|                        |                                                             | Source = other e.g. communication with expert                      | Correspondent surname and other descriptor e.g .PhD    |
| <b>id</b>              | Internal reference number                                   | Source = Covidence i.e. initial searches                           | Covidence ID number                                    |
|                        |                                                             | Source = Systematic Review                                         | SR# (# = original number)                              |
|                        |                                                             | Source = another included study                                    | INT#                                                   |
|                        |                                                             | Source = other e.g. communication with expert                      | EXT#                                                   |
| <b>study</b>           | Internal reference name                                     |                                                                    | First author's surname and year of publication         |
| <b>first_author</b>    | Surname of first author                                     |                                                                    |                                                        |
| <b>year_pub</b>        | Year of publication                                         |                                                                    |                                                        |
| <b>title</b>           | Title of study                                              |                                                                    |                                                        |
| <b>where_published</b> | Where was the study published?                              | If study published in a journal                                    | Name of journal                                        |
|                        |                                                             | If study published by organisation e.g. University, World Bank     | Name of organisation                                   |

|                                                                 |                                                                                              |                                                                       |                            |
|-----------------------------------------------------------------|----------------------------------------------------------------------------------------------|-----------------------------------------------------------------------|----------------------------|
| <b>publication_cat</b>                                          | What type of publication is this?                                                            |                                                                       | Journal                    |
|                                                                 |                                                                                              |                                                                       | Working paper              |
|                                                                 |                                                                                              |                                                                       | Report                     |
|                                                                 |                                                                                              |                                                                       | PhD thesis                 |
|                                                                 |                                                                                              |                                                                       | Other peer-reviewed        |
| <b>randomised</b>                                               | Is the study randomised?                                                                     |                                                                       | Randomised                 |
|                                                                 |                                                                                              |                                                                       | Not randomised             |
| <b>length</b>                                                   | Does the study include repeated measures on the same individuals?                            | No repeated measures                                                  | Cross-sectional            |
|                                                                 |                                                                                              | At least two waves of data collection on same individuals             | Longitudinal               |
| <b>int_assignment</b>                                           | What determines whether an individual receives our intervention of interest? (income change) | Determined by a researcher or trial design e.g. randomisation         | Researcher/trial           |
|                                                                 |                                                                                              | Determined directly by a policymaker                                  | Policymaker                |
|                                                                 |                                                                                              | Determined entirely by chance                                         | Chance                     |
|                                                                 |                                                                                              | Determined by the person's location                                   | Location                   |
|                                                                 |                                                                                              | Determined by a choice made by the person                             | Individual choice          |
|                                                                 |                                                                                              | Determined by some characteristics of the person e.g. SES, health     | Individual characteristics |
|                                                                 |                                                                                              | Any other clear factor not on the list                                | Other                      |
| It is not possible to determine why the person's income changed | Unclear/unknown                                                                              |                                                                       |                            |
| <b>objective</b>                                                | What is the aim of the study, as stated by authors?                                          |                                                                       |                            |
| <b>country</b>                                                  | In which country/countries did the study take place?                                         |                                                                       |                            |
| <b>setting</b>                                                  | What World Bank category was this country in at the time of the study?                       |                                                                       | High income                |
|                                                                 |                                                                                              |                                                                       | Middle income              |
|                                                                 |                                                                                              |                                                                       | Low income                 |
| <b>study_years</b>                                              | What years did the study take place?                                                         | Can be expressed as either a range or list (if exclude certain years) |                            |

|                           |                                                                                                  |                                                                                                                                                                                                                                                                 |                                      |
|---------------------------|--------------------------------------------------------------------------------------------------|-----------------------------------------------------------------------------------------------------------------------------------------------------------------------------------------------------------------------------------------------------------------|--------------------------------------|
| <b>fu_length</b>          | How many years of follow up were there (for our question of interest)?                           | If cross-sectional study                                                                                                                                                                                                                                        | n/a                                  |
|                           |                                                                                                  | If longitudinal study                                                                                                                                                                                                                                           | Number of years                      |
| <b>data_source</b>        | Brief description of data source                                                                 |                                                                                                                                                                                                                                                                 |                                      |
| <b>data_source_cat</b>    | Are the data primary or secondary?                                                               |                                                                                                                                                                                                                                                                 | Primary data                         |
|                           |                                                                                                  |                                                                                                                                                                                                                                                                 | Secondary data                       |
| <b>study_design</b>       | What is the design of the study in relation to our research question?                            | Longitudinal data, not a trial, no natural experiment (NE) elements                                                                                                                                                                                             | Basic longitudinal                   |
|                           |                                                                                                  | Cross-sectional data, not a trial, no NE elements                                                                                                                                                                                                               | Basic cross-sectional                |
|                           |                                                                                                  | Repeat cross-sectional data, not a trial, no NE elements                                                                                                                                                                                                        | Repeat cross-sectional               |
|                           |                                                                                                  | Pre-specified trial of an intervention, with randomisation                                                                                                                                                                                                      | Randomised trial of intervention     |
|                           |                                                                                                  | Pre-specified trial of an intervention, without randomisation                                                                                                                                                                                                   | Non-randomised trial of intervention |
|                           |                                                                                                  | Pre/post intervention study with control group e.g. NE using DiD or longitudinal data on same individuals                                                                                                                                                       | Before and after (controlled)        |
|                           |                                                                                                  | Pre/post intervention study without control group                                                                                                                                                                                                               | Before and after (no control)        |
|                           |                                                                                                  | Any other natural experiment not described here                                                                                                                                                                                                                 | Other natural experiment             |
| <b>sampling_frame</b>     | What was the population that was eligible for initial recruitment into <b>the whole sample</b> ? | Brief description covering inclusion criteria for initial data collection e.g. trial, cohort study                                                                                                                                                              |                                      |
| <b>excl_criteria</b>      | What excluded someone from being part of <b>our sample of interest</b> ?                         | List of reasons someone would be excluded from the sample in which we are interested (may be a subset of the whole sample)                                                                                                                                      |                                      |
| <b>total_participants</b> | Number of participants in our sample of interest                                                 |                                                                                                                                                                                                                                                                 |                                      |
| <b>average_age</b>        | Mean age in our sample of interest                                                               | <b>If not possible to extract for our sample of interest, extract for whole sample. If reported by subgroup e.g. by sex, extract overview of information where possible unless this would entail large amounts of data (applies to all demographic columns)</b> | Report mean and SD if available      |
| <b>age_range</b>          | Age range in our sample of interest                                                              | If not reported, indicate whether likely to be working age (16-65) based on sampling frame                                                                                                                                                                      |                                      |
| <b>percent_male</b>       | Percentage of our sample of interest which is male                                               |                                                                                                                                                                                                                                                                 |                                      |

|                     |                                                                                                                                                                                                                                                                                                                                                                |                                                                                                  |                                             |
|---------------------|----------------------------------------------------------------------------------------------------------------------------------------------------------------------------------------------------------------------------------------------------------------------------------------------------------------------------------------------------------------|--------------------------------------------------------------------------------------------------|---------------------------------------------|
| <b>sep</b>          | Socioeconomic breakdown of our sample of interest                                                                                                                                                                                                                                                                                                              | If possible extract education or other relevant individual indicator of SEP.                     |                                             |
| <b>ethnicity</b>    | Ethnic breakdown of our sample of interest                                                                                                                                                                                                                                                                                                                     | Nationality/country of origin (e.g. immigrant status) not sufficient                             |                                             |
| <b>int_type</b>     | <p>What is the reason for/source of the income change?</p> <p>NOTE: this is our judgement based on the identification strategy/ exposure measurement e.g. an income change simply occurring during a time of recession should be noted 'HH income change (reason unknown)' unless people were explicitly asked if their income fell *due to* the recession</p> | Cannot definitively identify cause of income change                                              | HH income change (reason unknown)           |
|                     |                                                                                                                                                                                                                                                                                                                                                                | Income received from lottery win                                                                 | Lottery win                                 |
|                     |                                                                                                                                                                                                                                                                                                                                                                | Income received from benefits after using advice service                                         | Income maximisation/benefits advice service |
|                     |                                                                                                                                                                                                                                                                                                                                                                | Change resulting from welfare policy only affecting cash                                         | Cash transfer only                          |
|                     |                                                                                                                                                                                                                                                                                                                                                                | Change resulting from other welfare policy                                                       | Other welfare policy                        |
|                     |                                                                                                                                                                                                                                                                                                                                                                | Change resulting from taxation/wage policy                                                       | Taxation/wage policy                        |
|                     |                                                                                                                                                                                                                                                                                                                                                                | Change explicitly described as change in salary (not due to policy)                              | Salary change                               |
|                     |                                                                                                                                                                                                                                                                                                                                                                | Change explicitly described as due to natural or unnatural disaster e.g. flood, terrorist attack | Natural/Unnatural disaster                  |
|                     |                                                                                                                                                                                                                                                                                                                                                                | Change explicitly described as due to illness or caring responsibilities                         | Illness/caring                              |
|                     |                                                                                                                                                                                                                                                                                                                                                                | Change explicitly described as due to marriage breakdown                                         | Marriage breakdown                          |
|                     |                                                                                                                                                                                                                                                                                                                                                                | Change explicitly described as due to macroeconomic event                                        | Macroeconomic event                         |
|                     | Income received from cash transfer from any another source                                                                                                                                                                                                                                                                                                     | Cash transfer (other source)                                                                     |                                             |
| <b>int_def</b>      | Description of the intervention/income change                                                                                                                                                                                                                                                                                                                  |                                                                                                  |                                             |
| <b>income_def</b>   | How is income defined within the study?                                                                                                                                                                                                                                                                                                                        | e.g. individual/household, gross/net, if equivalised, what currency                              |                                             |
| <b>int_meas_cat</b> | How is the income change measured?                                                                                                                                                                                                                                                                                                                             | If reported by respondent or proxy                                                               | Self-report                                 |
|                     |                                                                                                                                                                                                                                                                                                                                                                | If deduced from administrative data                                                              | Admin data                                  |
|                     |                                                                                                                                                                                                                                                                                                                                                                | If self-evident from trial data e.g. randomisation status                                        | Trial data                                  |
|                     |                                                                                                                                                                                                                                                                                                                                                                | If estimated or modelled from other available data                                               | Estimated/modelled                          |
| <b>int_duration</b> | How long did the intervention last for?                                                                                                                                                                                                                                                                                                                        | Also mention here if there was a delay between intervention ceasing and data collection          |                                             |
| <b>int_mean</b>     | Mean value of the intervention measure (if applicable)                                                                                                                                                                                                                                                                                                         |                                                                                                  |                                             |
| <b>int_sd</b>       | SD of the intervention measure (if applicable)                                                                                                                                                                                                                                                                                                                 |                                                                                                  |                                             |

|                         |                                                                                                                 |                                                                                                                   |                                |
|-------------------------|-----------------------------------------------------------------------------------------------------------------|-------------------------------------------------------------------------------------------------------------------|--------------------------------|
| <b>comparator</b>       | Who/what is the comparator?                                                                                     | e.g. self, control group                                                                                          |                                |
| <b>outcome_domain</b>   | Which of our two broad outcome domains does the study report on?                                                |                                                                                                                   | Mental health                  |
|                         |                                                                                                                 |                                                                                                                   | Wellbeing                      |
|                         |                                                                                                                 |                                                                                                                   | Both                           |
| <b>outcome_type</b>     | Which subcategory does the outcome report on? (Should be based on our view of measure, not what study calls it) | If uses measure of mental health e.g. depression, anxiety, stress (NOT substance use)                             | Mental health                  |
|                         |                                                                                                                 | If asks about positive/negative affect, general wellbeing scales                                                  | Wellbeing                      |
|                         |                                                                                                                 | If asks about satisfaction with life (NOT individual aspects e.g. work)                                           | Life satisfaction              |
|                         |                                                                                                                 | If asks about happiness (NOT affect)                                                                              | Happiness                      |
|                         |                                                                                                                 | If uses formal quality of life scale (NOT health-related QoL)                                                     | Quality of Life                |
| <b>outcome_def</b>      | How is the outcome defined within the study?                                                                    | Can include information on how scores are calculated here, particularly if different from standard use of measure |                                |
| <b>outcome_meas_cat</b> | How is the outcome measured?                                                                                    | If simple survey question rather than tool                                                                        | Self-report - Survey Q         |
|                         |                                                                                                                 | If a validated tool is used as intended (or alterations justified)                                                | Self-report - validated tool   |
|                         |                                                                                                                 | If ascertained from administrative data                                                                           | Admin data                     |
|                         |                                                                                                                 | If ascertained from clinical interview                                                                            | Clinical interview             |
| <b>outcome_duration</b> | How long did the outcome last for/how long is it measure over?                                                  | If cross-sectional measurement rather than other time = n/a                                                       |                                |
| <b>outcome_mean</b>     | Mean of the outcome measure(s) (if applicable)                                                                  |                                                                                                                   |                                |
| <b>outcome_sd</b>       | SD of the outcome measure(s) (if applicable)                                                                    |                                                                                                                   |                                |
| <b>analysis_type</b>    | What type of analysis was performed?                                                                            | Simple regression modelling +/- adjustment for confounders                                                        | Standard regression            |
|                         |                                                                                                                 |                                                                                                                   | Fixed/Random effects model     |
|                         |                                                                                                                 |                                                                                                                   | Interrupted time series        |
|                         |                                                                                                                 |                                                                                                                   | Difference in difference       |
|                         |                                                                                                                 |                                                                                                                   | Instrumental variable analysis |
|                         |                                                                                                                 |                                                                                                                   | Propensity score matching      |
|                         |                                                                                                                 |                                                                                                                   | Structural equation modelling  |

|                                             |                                                                                                     |                                                                                                                             |                            |
|---------------------------------------------|-----------------------------------------------------------------------------------------------------|-----------------------------------------------------------------------------------------------------------------------------|----------------------------|
|                                             |                                                                                                     | Any other NE method aimed at assessing causality not listed                                                                 | Other causal method        |
|                                             |                                                                                                     |                                                                                                                             | Correlation                |
|                                             |                                                                                                     |                                                                                                                             | Chi squared                |
|                                             |                                                                                                     |                                                                                                                             | t-test                     |
|                                             |                                                                                                     | e.g. ANOVA                                                                                                                  | Other                      |
| <b>analysis_desc</b>                        | Description of the analysis performed                                                               | Include type of regression e.g. linear, probit                                                                              |                            |
| <b>conf_controlled</b>                      | What confounding variables were adjusted for?                                                       |                                                                                                                             |                            |
| <b>mediators_or_modifiers</b>               | Were any mediators or moderators investigated?                                                      | Focus on those relevant to our question                                                                                     |                            |
| <b>ADDITIONAL DATAPOINT LEVEL VARIABLES</b> |                                                                                                     |                                                                                                                             |                            |
| <b>Field</b>                                | <b>Brief description</b>                                                                            | <b>Guidance</b>                                                                                                             | <b>Permissible entries</b> |
| <b>gender</b>                               | Sex/gender of participants for this datapoint                                                       | Only men                                                                                                                    | Male                       |
|                                             |                                                                                                     | Only women                                                                                                                  | Female                     |
|                                             |                                                                                                     | Includes men and women                                                                                                      | Both                       |
| <b>age</b>                                  | Does this sample only include working age population?                                               |                                                                                                                             | Working age only           |
|                                             |                                                                                                     |                                                                                                                             | Includes <16s or >64s      |
| <b>study_design</b>                         | What is the study design?                                                                           | If randomised controlled trial                                                                                              | RCT                        |
|                                             |                                                                                                     | If non-randomised study                                                                                                     | NRS                        |
| <b>SG1_earned</b>                           | For subgroup analysis: is the change to earned or unearned income?                                  | If <b>likely</b> includes earned income as main component                                                                   | Earned income              |
|                                             |                                                                                                     | If <b>only</b> includes unearned income e.g. welfare                                                                        | Unearned income            |
| <b>SG2_size</b>                             | For subgroup analysis: what size is the income change? For one-off payment, consider annual context | If <20% increase to annual income                                                                                           | Small change               |
|                                             |                                                                                                     | If >20% increase to annual income OR described in study as large OR described as 'subsistence amount' in low-income setting | Large change               |
|                                             |                                                                                                     | If includes small and large changes                                                                                         | Includes both              |
| <b>SG3_SEP</b>                              | For subgroup analysis: what is the socioeconomic position of the sample? (not just country/setting) | If only includes those with low baseline SEP                                                                                | Low SEP                    |
|                                             |                                                                                                     | If only includes those on high baseline SEP                                                                                 | High SEP                   |
|                                             |                                                                                                     | If includes a mix of low and high baseline SEP                                                                              | Mixed                      |



|                        |                                                                                                         |                                                                                                                                                                               |                                    |
|------------------------|---------------------------------------------------------------------------------------------------------|-------------------------------------------------------------------------------------------------------------------------------------------------------------------------------|------------------------------------|
| <b>poverty</b>         | Does the income change likely cross a meaningful poverty or subsistence threshold?                      | If income change is explicitly described as crossing a poverty threshold OR represents a “large change” (as per our definition) in a population of solely low SEP individuals | Yes                                |
|                        |                                                                                                         | All other situations                                                                                                                                                          | No                                 |
| <b>conditionality?</b> | Was the income change associated with conditionality? i.e. did the person have to do anything in return | If clear conditions attached to receipt e.g. conditional cash transfer                                                                                                        | Yes                                |
|                        |                                                                                                         | If no clear conditions associated with income change                                                                                                                          | No                                 |
| <b>int_meas_cat1</b>   | What type of measurement is the intervention?                                                           |                                                                                                                                                                               | Continuous                         |
|                        |                                                                                                         |                                                                                                                                                                               | Binary                             |
|                        |                                                                                                         |                                                                                                                                                                               | Ordinal                            |
| <b>int_meas_cat2</b>   | Is the income change only in one direction?                                                             |                                                                                                                                                                               | Increase only                      |
|                        |                                                                                                         |                                                                                                                                                                               | Decrease only                      |
|                        |                                                                                                         | If study does not separate the two                                                                                                                                            | No distinction                     |
| <b>out_meas_cat</b>    | What type of measurement is the outcome?                                                                |                                                                                                                                                                               | Continuous                         |
|                        |                                                                                                         |                                                                                                                                                                               | Binary                             |
|                        |                                                                                                         |                                                                                                                                                                               | Ordinal                            |
| <b>outcome_measure</b> | What type of datapoint is this?                                                                         |                                                                                                                                                                               | Reg coefficient - unadjusted       |
|                        |                                                                                                         |                                                                                                                                                                               | Reg coefficient - adjusted         |
|                        |                                                                                                         |                                                                                                                                                                               | Odds ratio - unadjusted            |
|                        |                                                                                                         |                                                                                                                                                                               | Odds ratio - adjusted              |
|                        |                                                                                                         |                                                                                                                                                                               | Risk ratio - unadjusted            |
|                        |                                                                                                         |                                                                                                                                                                               | Risk ratio - adjusted              |
|                        |                                                                                                         |                                                                                                                                                                               | Rate ratio - unadjusted            |
|                        |                                                                                                         |                                                                                                                                                                               | Rate ratio - adjusted              |
|                        |                                                                                                         |                                                                                                                                                                               | Change/diff. in score - unadjusted |
|                        |                                                                                                         |                                                                                                                                                                               | Change/diff. in score - adjusted   |
|                        | Correlation coefficient                                                                                 |                                                                                                                                                                               |                                    |

|                           |                                                                                                                                                                |                                                                                            |     |
|---------------------------|----------------------------------------------------------------------------------------------------------------------------------------------------------------|--------------------------------------------------------------------------------------------|-----|
| <b>standardised_beta?</b> | If this is a regression coefficient, is it a standardised beta? i.e. the interpretation is the change in outcome in SDs resulting from 1 SD change in exposure |                                                                                            | Yes |
|                           |                                                                                                                                                                |                                                                                            | No  |
|                           |                                                                                                                                                                | If unsure or unclear from study, note this                                                 | n/a |
| <b>point_est</b>          | The main datapoint estimate of interest                                                                                                                        | Should be adjusted estimate if available                                                   |     |
| <b>n_numerator</b>        | Relevant numerator (if appropriate)                                                                                                                            | Can use this to record n of exposed/unexposed                                              |     |
| <b>n_denominator</b>      | Relevant denominator                                                                                                                                           | Should be <i>observations</i> for longitudinal data                                        |     |
| <b>other_denom</b>        | Any other relevant denominator (if appropriate)                                                                                                                | Can use this to record n of individuals for longitudinal data                              |     |
| <b>lower_ci</b>           | Lower 95% confidence interval (if appropriate)                                                                                                                 |                                                                                            |     |
| <b>upper_ci</b>           | Upper 95% confidence interval (if appropriate)                                                                                                                 |                                                                                            |     |
| <b>se</b>                 | Standard error (if appropriate)                                                                                                                                |                                                                                            |     |
| <b>sd</b>                 | Standard deviation (if appropriate)                                                                                                                            |                                                                                            |     |
| <b>stat_sig?</b>          | Is the point estimate of interest significant at 5% level?                                                                                                     |                                                                                            | Yes |
|                           |                                                                                                                                                                |                                                                                            | No  |
| <b>comp_point_est</b>     | The main comparator datapoint of interest                                                                                                                      | May be either outcome in comparator group OR unadjusted regression coefficient             |     |
| <b>comp_numerator</b>     | Relevant numerator (if appropriate)                                                                                                                            |                                                                                            |     |
| <b>comp_denominator</b>   | Relevant denominator                                                                                                                                           |                                                                                            |     |
| <b>comp_otherdenom</b>    | Any other relevant denominator (if appropriate)                                                                                                                |                                                                                            |     |
| <b>comp_lower_ci</b>      | Lower 95% confidence interval (if appropriate)                                                                                                                 |                                                                                            |     |
| <b>comp_upper_ci</b>      | Upper 95% confidence interval (if appropriate)                                                                                                                 |                                                                                            |     |
| <b>comp_sd_or_se</b>      | Standard deviation OR standard error (whichever appropriate)                                                                                                   | Should be same option as main datapoint, but if not this should be indicated in notes cell |     |
| <b>comp2_pointest</b>     | Secondary comparator datapoint of interest                                                                                                                     | If used, should be described in notes cell                                                 |     |
| <b>comp2_numerator</b>    | Relevant numerator (if appropriate)                                                                                                                            |                                                                                            |     |
| <b>comp2_denominator</b>  | Relevant denominator                                                                                                                                           |                                                                                            |     |
| <b>comp2_lower_ci</b>     | Lower 95% confidence interval (if appropriate)                                                                                                                 |                                                                                            |     |
| <b>comp2_upper_ci</b>     | Upper 95% confidence interval (if appropriate)                                                                                                                 |                                                                                            |     |
| <b>comp2_sd_or_se</b>     | Standard deviation OR standard error (whichever appropriate)                                                                                                   | Should be same option as main datapoint, but if not this should be indicated in notes cell |     |

## Appendix B: Details of search strategy

**Date of searches: 5<sup>th</sup> February 2020**

**Total number of hits across all databases: 23,822**

**Number of hits once duplicates removed in EndNote: 17,823**

| Database       | Initial       | Deduplicated  |
|----------------|---------------|---------------|
| Medline        | 1431          | 1413          |
| Embase         | 2800          | 1666          |
| Web of Science | 6843          | 5382          |
| PsycINFO       | 3650          | 2101          |
| EconLit        | 6367          | 5451          |
| ASSIA          | 1218          | 383           |
| RePEc          | 1513          | 1427          |
| <b>Total</b>   | <b>23,822</b> | <b>17,823</b> |

**Number of hits once additional duplicates removed in Covidence: 16,521**

**Ovid MEDLINE(R) 1946 to January Week 4 2020**

|    |                                                                                                                                                                                                                                                                                                                                             |        |
|----|---------------------------------------------------------------------------------------------------------------------------------------------------------------------------------------------------------------------------------------------------------------------------------------------------------------------------------------------|--------|
| 1  | "Mental Health"/                                                                                                                                                                                                                                                                                                                            | 36294  |
| 2  | Depression/                                                                                                                                                                                                                                                                                                                                 | 114576 |
| 3  | Anxiety/ or "Anxiety Disorder"/                                                                                                                                                                                                                                                                                                             | 106108 |
| 4  | Well-being.ab,ti.                                                                                                                                                                                                                                                                                                                           | 58627  |
| 5  | Wellbeing.ab,ti.                                                                                                                                                                                                                                                                                                                            | 10960  |
| 6  | "Quality of Life"/                                                                                                                                                                                                                                                                                                                          | 187275 |
| 7  | "Life satisfaction".ab,ti.                                                                                                                                                                                                                                                                                                                  | 5908   |
| 8  | "Psychological distress".ab,ti.                                                                                                                                                                                                                                                                                                             | 15125  |
| 9  | ((income* or "social security" or earning* or salar* or wage* or money or financ* or loan* or debt* or payment* or lottery or poverty or monies or wealth or cash or welfare) adj3 (effect* or change* or increas* or decreas* or variation* or alter* or transfer* or shock* or win* or won or award* or transition or additional)).ab,ti. | 19121  |
| 10 | 1 or 2 or 3 or 4 or 5 or 6 or 7 or 8                                                                                                                                                                                                                                                                                                        | 449982 |
| 11 | 9 and 10                                                                                                                                                                                                                                                                                                                                    | 1431   |

**Embase 1947-Present, updated daily**

|   |                                 |        |
|---|---------------------------------|--------|
| 1 | "Mental Health"/                | 137116 |
| 2 | Depression/                     | 363527 |
| 3 | Anxiety/ or "Anxiety Disorder"/ | 271435 |
| 4 | Well-being.ab,ti.               | 91982  |
| 5 | Wellbeing.ab,ti.                | 23716  |

|    |                                                                                                                                                                                                                                                                                                                                           |         |
|----|-------------------------------------------------------------------------------------------------------------------------------------------------------------------------------------------------------------------------------------------------------------------------------------------------------------------------------------------|---------|
| 6  | "Quality of Life"/                                                                                                                                                                                                                                                                                                                        | 453495  |
| 7  | "Life satisfaction".ab,ti.                                                                                                                                                                                                                                                                                                                | 8751    |
| 8  | "Psychological distress".ab,ti.                                                                                                                                                                                                                                                                                                           | 23551   |
| 9  | ((income* or social security or earning* or salar* or wage* or money or financ* or loan* or debt* or payment* or lottery or poverty or monies or wealth or cash or welfare) adj3 (effect* or change* or increas* or decreas* or variation* or alter* or transfer* or shock* or win* or won or award* or transition or additional)).ab,ti. | 27743   |
| 10 | 1 or 2 or 3 or 4 or 5 or 6 or 7 or 8                                                                                                                                                                                                                                                                                                      | 1122531 |
| 11 | 9 and 10                                                                                                                                                                                                                                                                                                                                  | 2800    |

### Web of Science Core Collection

|      |           |                                                                                                                                                                                                                                                                                                                                                                                                                      |
|------|-----------|----------------------------------------------------------------------------------------------------------------------------------------------------------------------------------------------------------------------------------------------------------------------------------------------------------------------------------------------------------------------------------------------------------------------|
| # 10 | 6,843     | #9 AND #8<br><i>Databases= WOS Timespan=All years</i><br><i>Search language=Auto</i>                                                                                                                                                                                                                                                                                                                                 |
| # 9  | 1,426,253 | #7 OR #6 OR #5 OR #4 OR #3 OR #2 OR #1<br><i>Databases= WOS Timespan=All years</i><br><i>Search language=Auto</i>                                                                                                                                                                                                                                                                                                    |
| # 8  | 113,223   | TS=((income* OR "social security" OR earning* OR salar* OR wage* OR money OR financ* OR loan* OR debt* OR payment* OR lottery OR poverty OR monies OR wealth OR cash OR welfare) NEAR/3 (effect* OR change* OR increas* OR decreas* OR variation* OR alter* OR transfer* OR shock* OR win* OR won OR award* OR transition OR additional))<br><i>Databases= WOS Timespan=All years</i><br><i>Search language=Auto</i> |
| # 7  | 31,903    | TS="Psychological distress"<br><i>Databases= WOS Timespan=All years</i><br><i>Search language=Auto</i>                                                                                                                                                                                                                                                                                                               |
| # 6  | 17,537    | TS="Life satisfaction"<br><i>Databases= WOS Timespan=All years</i><br><i>Search language=Auto</i>                                                                                                                                                                                                                                                                                                                    |
| # 5  | 437,327   | TS="Quality of Life"<br><i>Databases= WOS Timespan=All years</i><br><i>Search language=Auto</i>                                                                                                                                                                                                                                                                                                                      |
| # 4  | 142,010   | TS=(Wellbeing OR well-being)<br><i>Databases= WOS Timespan=All years</i><br><i>Search language=Auto</i>                                                                                                                                                                                                                                                                                                              |
| # 3  | 326,424   | TS=(Anxiety OR "Anxiety disorder")<br><i>Databases= WOS Timespan=All years</i><br><i>Search language=Auto</i>                                                                                                                                                                                                                                                                                                        |
| # 2  | 611,768   | TS=Depression<br><i>Databases= WOS Timespan=All years</i><br><i>Search language=Auto</i>                                                                                                                                                                                                                                                                                                                             |
| # 1  | 239,157   | TS="Mental Health"<br><i>Databases= WOS Timespan=All years</i><br><i>Search language=Auto</i>                                                                                                                                                                                                                                                                                                                        |

## PsycINFO

| Search Terms | Search Options                                                                                                                                                                                                                                                                                                                                                                                                                                                                                                                                                                                                                                                                         |         |
|--------------|----------------------------------------------------------------------------------------------------------------------------------------------------------------------------------------------------------------------------------------------------------------------------------------------------------------------------------------------------------------------------------------------------------------------------------------------------------------------------------------------------------------------------------------------------------------------------------------------------------------------------------------------------------------------------------------|---------|
| S9           | S7 AND S8                                                                                                                                                                                                                                                                                                                                                                                                                                                                                                                                                                                                                                                                              | 3,650   |
| S8           | S1 OR S2 OR S3 OR S4 OR S5 OR S6                                                                                                                                                                                                                                                                                                                                                                                                                                                                                                                                                                                                                                                       | 701,660 |
| S7           | TI ( ((income* OR "social security" OR earning* OR salar* OR wage* OR money OR financ* OR loan* OR debt* OR payment* OR lottery OR poverty OR monies OR wealth OR cash OR welfare) N3 (effect* OR change* OR increas* OR decreas* OR variation* OR alter* OR transfer* OR shock* OR win* OR won OR award* OR transition OR additional)) ) OR AB ( ((income* OR "social security" OR earning* OR salar* OR wage* OR money OR financ* OR loan* OR debt* OR payment* OR lottery OR poverty OR monies OR wealth OR cash OR welfare) N3 (effect* OR change* OR increas* OR decreas* OR variation* OR alter* OR transfer* OR shock* OR win* OR won OR award* OR transition OR additional)) ) | 18,125  |
| S6           | SU "life satisfaction" OR TI "life satisfaction" OR AB "life satisfaction"                                                                                                                                                                                                                                                                                                                                                                                                                                                                                                                                                                                                             | 15,841  |
| S5           | SU "quality of life" OR TI "quality of life" OR AB "quality of life"                                                                                                                                                                                                                                                                                                                                                                                                                                                                                                                                                                                                                   | 79,719  |
| S4           | SU ( wellbeing or well-being ) OR TI ( wellbeing or well-being ) OR AB ( wellbeing or well-being )                                                                                                                                                                                                                                                                                                                                                                                                                                                                                                                                                                                     | 91,776  |
| S3           | SU ( anxiety or "anxiety disorder" ) OR TI ( anxiety or "anxiety disorder" ) OR AB ( anxiety or "anxiety disorder" )                                                                                                                                                                                                                                                                                                                                                                                                                                                                                                                                                                   | 212,887 |
| S2           | SU depression OR TI depression OR AB depression                                                                                                                                                                                                                                                                                                                                                                                                                                                                                                                                                                                                                                        | 274,589 |
| S1           | SU "mental health" OR TI "mental health" OR AB "mental health"                                                                                                                                                                                                                                                                                                                                                                                                                                                                                                                                                                                                                         | 216,366 |

## EconLit

|    |                                                                                                                                                                                                                                                                                                                                                                                                                                                                                                                                                                                                                                                                                        |        |
|----|----------------------------------------------------------------------------------------------------------------------------------------------------------------------------------------------------------------------------------------------------------------------------------------------------------------------------------------------------------------------------------------------------------------------------------------------------------------------------------------------------------------------------------------------------------------------------------------------------------------------------------------------------------------------------------------|--------|
| S9 | S7 AND S8                                                                                                                                                                                                                                                                                                                                                                                                                                                                                                                                                                                                                                                                              | 6,367  |
| S8 | S1 OR S2 OR S3 OR S4 OR S5 OR S6                                                                                                                                                                                                                                                                                                                                                                                                                                                                                                                                                                                                                                                       | 44,293 |
| S7 | TI ( ((income* OR "social security" OR earning* OR salar* OR wage* OR money OR financ* OR loan* OR debt* OR payment* OR lottery OR poverty OR monies OR wealth OR cash OR welfare) N3 (effect* OR change* OR increas* OR decreas* OR variation* OR alter* OR transfer* OR shock* OR win* OR won OR award* OR transition OR additional)) ) OR AB ( ((income* OR "social security" OR earning* OR salar* OR wage* OR money OR financ* OR loan* OR debt* OR payment* OR lottery OR poverty OR monies OR wealth OR cash OR welfare) N3 (effect* OR change* OR increas* OR decreas* OR variation* OR alter* OR transfer* OR shock* OR win* OR won OR award* OR transition OR additional)) ) | 86,310 |
| S6 | SU "life satisfaction" OR TI "life satisfaction" OR AB "life satisfaction"                                                                                                                                                                                                                                                                                                                                                                                                                                                                                                                                                                                                             | 1,408  |
| S5 | SU "quality of life" OR TI "quality of life" OR AB "quality of life"                                                                                                                                                                                                                                                                                                                                                                                                                                                                                                                                                                                                                   | 3,362  |
| S4 | SU ( wellbeing or well-being ) OR TI ( wellbeing or well-being ) OR AB ( wellbeing or well-being )                                                                                                                                                                                                                                                                                                                                                                                                                                                                                                                                                                                     | 36,430 |
| S3 | SU ( anxiety or "anxiety disorder" ) OR TI ( anxiety or "anxiety disorder" ) OR AB ( anxiety or "anxiety disorder" )                                                                                                                                                                                                                                                                                                                                                                                                                                                                                                                                                                   | 876    |
| S2 | SU depression OR TI depression OR AB depression                                                                                                                                                                                                                                                                                                                                                                                                                                                                                                                                                                                                                                        | 4,486  |
| S1 | SU "mental health" OR TI "mental health" OR AB "mental health"                                                                                                                                                                                                                                                                                                                                                                                                                                                                                                                                                                                                                         | 1,780  |

## Applied Social Sciences Index & Abstracts (ASSIA)

|    |                                         |         |
|----|-----------------------------------------|---------|
| S9 | <u>S7 AND S8</u>                        | 1,218   |
| S8 | <u>S1 OR S2 OR S3 OR S4 OR S5 OR S6</u> | 179,510 |

|           |                                                                                                                                                                                                                                                                                                                                                                                                                                                                                                                                                                                                                                                                                          |        |
|-----------|------------------------------------------------------------------------------------------------------------------------------------------------------------------------------------------------------------------------------------------------------------------------------------------------------------------------------------------------------------------------------------------------------------------------------------------------------------------------------------------------------------------------------------------------------------------------------------------------------------------------------------------------------------------------------------------|--------|
| <b>S7</b> | ti(((income* OR "social security" OR earning* OR salar* OR wage* OR money OR financ* OR loan* OR debt* OR payment* OR lottery OR poverty OR monies OR wealth OR cash OR welfare) NEAR/3 (effect* OR change* OR increas* OR decreas* OR variation* OR alter* OR transfer* OR shock* OR win* OR won OR award* OR transition OR additional))) OR ab(((income* OR "social security" OR earning* OR salar* OR wage* OR money OR financ* OR loan* OR debt* OR payment* OR lottery OR poverty OR monies OR wealth OR cash OR welfare) NEAR/3 (effect* OR change* OR increas* OR decreas* OR variation* OR alter* OR transfer* OR shock* OR win* OR won OR award* OR transition OR additional))) | 9,650  |
| <b>S6</b> | <u>su("life satisfaction") OR ti("life satisfaction") OR ab("life satisfaction")</u>                                                                                                                                                                                                                                                                                                                                                                                                                                                                                                                                                                                                     | 3,838  |
| <b>S5</b> | <u>su("quality of life") OR ti("quality of life") OR ab("quality of life")</u>                                                                                                                                                                                                                                                                                                                                                                                                                                                                                                                                                                                                           | 24,337 |
| <b>S4</b> | <u>su(wellbeing OR well-being) OR ti(wellbeing OR well-being) OR ab(wellbeing OR well-being)</u>                                                                                                                                                                                                                                                                                                                                                                                                                                                                                                                                                                                         | 31,076 |
| <b>S3</b> | <u>su(anxiety OR "anxiety disorder") OR ti(anxiety OR "anxiety disorder") OR ab(anxiety OR "anxiety disorder")</u>                                                                                                                                                                                                                                                                                                                                                                                                                                                                                                                                                                       | 41,243 |
| <b>S2</b> | <u>su(depression) OR ti(depression) OR ab(depression)</u>                                                                                                                                                                                                                                                                                                                                                                                                                                                                                                                                                                                                                                | 59,941 |
| <b>S1</b> | <u>su("mental health") OR ti("mental health") OR ab("mental health")</u>                                                                                                                                                                                                                                                                                                                                                                                                                                                                                                                                                                                                                 | 71,210 |

### RePEC

("mental health" | depression | anxiety | well-being | wellbeing | "quality of life" | "life satisfaction" | "psychological distress") + (income\* | "social security" | earning\* | salar\* | wage\* | money | financ\* | loan\* | debt\* | lottery | poverty | "cash transfer" | welfare) + (change\* | alter\* | shock\* | w?n)

Search within: abstract only. Limit to: [nil]

|          |                                                                                 |
|----------|---------------------------------------------------------------------------------|
| Articles | 711 found; 5 failed URLs (2 duplicates)<br>= 706 importable, 3 manually sourced |
| Papers   | 802 found; 9 failed URLs (5 duplicates)<br>= 793 importable, 4 manually sourced |

Search within: title only. Limit to: [nil]

|          |                                                             |
|----------|-------------------------------------------------------------|
| Articles | 5 found; 0 failed URLs<br>= 5 importable                    |
| Papers   | 2 found; 1 failed URL<br>= 1 importable, 1 manually sourced |

**Total:** 706 + 3 + 793 + 4 + 5 + 2 = **1513**

## Appendix C: PRISMA flowchart

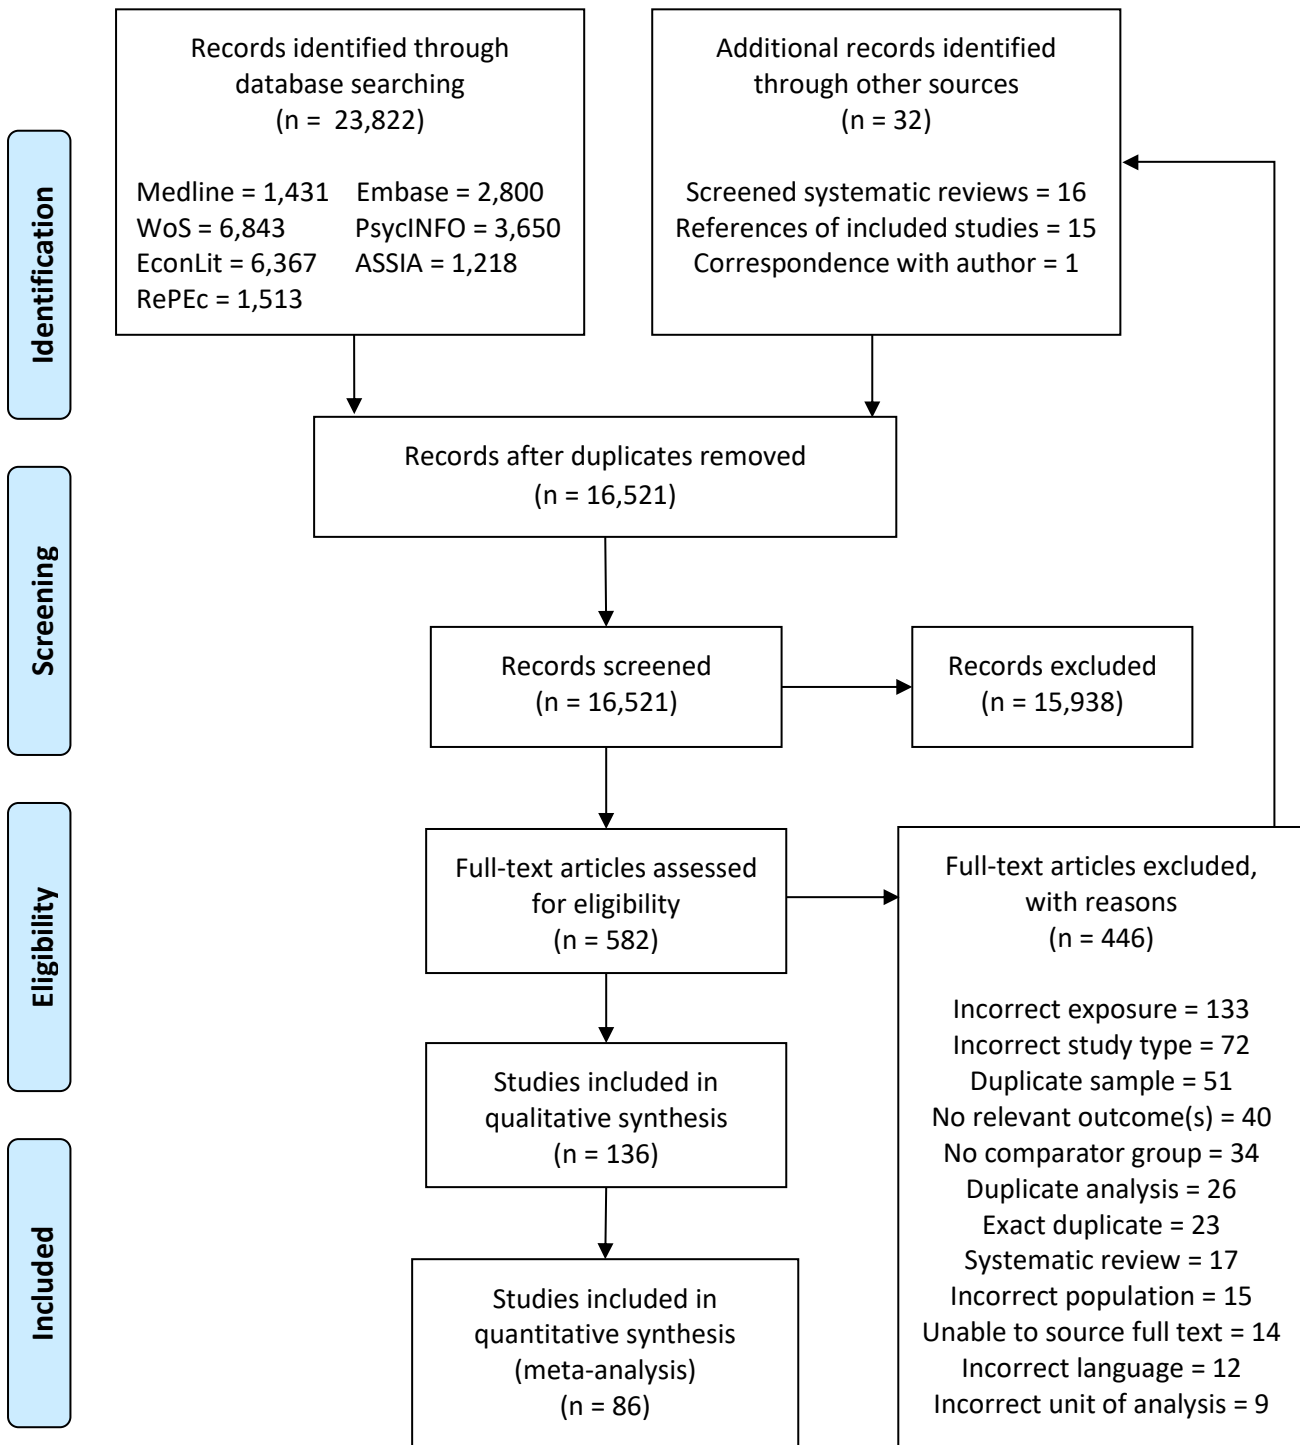

Cohen's Kappa for full text screening was 0.67, indicating substantial agreement.

**Note:** the 446 articles excluded at full-text stage are listed in Appendix E with reason for exclusion

## Appendix D: Details of included studies

### List of 136 included studies

- ABBOTT, S. & HOBBY, L. 2000. Welfare benefits advice in primary care: evidence of improvements in health. *Public Health*, 114, 324-327.
- ABBOTT, S., HOBBY, L. & COTTER, S. 2006. What is the impact on individual health of services in general practice settings which offer welfare benefits advice? *Health & Social Care in the Community*, 14, 1-8.
- ABEL, G. A., ALBELDA, R., KHERA, N., HAHN, T., CORONADO, D. Y. S., ODEJIDE, O. O., BONA, K., TUCKER-SEELEY, R. & SOIFFER, R. 2016. Financial Hardship and Patient-Reported Outcomes after Hematopoietic Cell Transplantation. *Biology of Blood and Marrow Transplantation*, 22, 1504-1510.
- ADAMS, H., BELL, A. R. & TAMAL, M. E. H. 2019. Temporal dimensions of reported life satisfaction in a low-income, agricultural environment. *Ecology and Society*, 24.
- ADEOLA, F. O. 2009. Mental health & psychosocial distress sequelae of Katrina: An empirical study of survivors. *Human Ecology Review*, 195-210.
- ALLOUCHE, M. 2019. *Psychological Well-Being and the Dynamics of Poverty*. Ph.D., University of California, Davis.
- AMBREY, C. L. & FLEMING, C. M. 2014. The causal effect of income on life satisfaction and the implications for valuing non-market goods. *Economics Letters*, 123, 131-134.
- AMERICAN INSTITUTES FOR RESEARCH 2014. 12-Month Impact Report for Zimbabwe's Harmonised Social Cash Transfer Programmes. American Institutes for Research Washington, DC.
- APOUEY, B. & CLARK, A. E. 2015. Winning big but feeling no better? The effect of lottery prizes on physical and mental health. *Health Economics*, 24, 516-38.
- ARATA, C. M., PICOU, J. S., JOHNSON, G. D. & MCNALLY, T. S. 2000. Coping with technological disaster: An application of the conservation of resources model to the Exxon Valdez oil spill. *Journal of Traumatic Stress: Official Publication of The International Society for Traumatic Stress Studies*, 13, 23-39.
- ARAYA, R., LEWIS, G., ROJAS, G. & FRITSCH, R. 2003. Education and income: Which is more important for mental health? *Journal of epidemiology and community health*, 57, 501-505.
- ASADULLAH, M. N. & CHAUDHURY, N. 2012. Subjective well-being and relative poverty in rural Bangladesh. *Journal of Economic Psychology*, 33, 940-950.
- ASSARI, S., PREISER, B. & KELLY, M. 2018. Education and income predict future emotional well-being of whites but not blacks: A ten-year cohort. *Brain Sciences*, 8.
- BAIRD, S., DE HOOP, J. & OZLER, B. 2013. Income Shocks and Adolescent Mental Health. *Journal of Human Resources*, 48, 370-403.
- BARBAGLIA, M. G., TEN HAVE, M., DORSSELAER, S., ALONSO, J. & DE GRAAF, R. 2015. Negative socioeconomic changes and mental disorders: a longitudinal study. *Journal of Epidemiology & Community Health*, 69, 55-62.
- BECCHETTI, L. & CASTRIOTA, S. 2010. The Effects of a Calamity on Income and Wellbeing of Poor Microfinance Borrowers: The Case of the 2004 Tsunami Shock. *Journal of Development Studies*, 46, 211-233.
- BEDOYA ARGUELLES, G., COVILLE, A., HAUSHOFER, J., ISAQZADEH, M. R. & SHAPIRO, J. 2019. No Household Left Behind : Afghanistan Targeting the Ultra Poor Impact Evaluation. The World Bank, Policy Research Working Paper Series: 8877.



- BENZEVAL, M. & JUDGE, K. 2001. Income and health: the time dimension. *Social science & medicine*, 52, 1371-1390.
- BIOTTEAU, A. L., BONNET, C. & CAMBOIS, E. 2019. Risk of Major Depressive Episodes After Separation: The Gender-Specific Contribution of the Income and Support Lost Through Union Dissolution. *European Journal of Population-Revue Europeenne De Demographie*, 35, 519-542.
- BLAND, S. H., O'LEARY, E. S., FARINARO, E., JOSSA, F. & TREVISAN, M. 1996. Long-term psychological effects of natural disasters. *Psychosomatic medicine*, 58, 18-24.
- BLAZQUEZ CUESTA, M. & BUDRIA, S. 2013. Does income deprivation affect people's mental well-being? : Banco de Espana, Banco de Espana Working Papers: 1312.
- BOLDEN, L. & WICKS, M. N. 2010. Predictors of Mental Health, Subjective Burden, and Rewards in Family Caregivers of Patients With Chronic Liver Disease. *Archives of Psychiatric Nursing*, 24, 89-103.
- BONANNO, G. A., GALEA, S., BUCCIARELLI, A. & VLAHOV, D. 2007. What Predicts Psychological Resilience After Disaster? The Role of Demographics, Resources, and Life Stress. *Journal of Consulting and Clinical Psychology*, 75, 671-682.
- BOYCE, C. J., DELANEY, L. & WOOD, A. M. 2018. The Great Recession and subjective well-being: How did the life satisfaction of people living in the United Kingdom change following the financial crisis? *PLoS ONE [Electronic Resource]*, 13, e0201215.
- BOYCE, C. J., WOOD, A. M., BANKS, J., CLARK, A. E. & BROWN, G. D. 2013. Money, well-being, and loss aversion: does an income loss have a greater effect on well-being than an equivalent income gain? *Psychological Science*, 24, 2557-62.
- BOYCE, W., RAJA, S., PATRANABISH, R. G., BEKOE, T., DEME-DER, D. & GALLUPE, O. 2009. Occupation, poverty and mental health improvement in Ghana. *Alter*, 3, 233-244.
- BOYD-SWAN, C., HERBST, C. M., IFCHER, J. & ZARGHAMEE, H. 2016. The earned income tax credit, mental health, and happiness. *Journal of Economic Behavior & Organization*, 126, 18-38.
- BRENNER, M. H., ANDREEVA, E., THEORELL, T., GOLDBERG, M., WESTERLUND, H., LEINWEBER, C., HANSON, L. L. M., IMBERNON, E. & BONNAUD, S. 2014. Organizational downsizing and depressive symptoms in the European recession: the experience of workers in France, Hungary, Sweden and the United Kingdom. *PloS one*, 9, e97063.
- BRICKMAN, P., COATES, D. & JANOFF-BULMAN, R. 1978. Lottery winners and accident victims: Is happiness relative? *Journal of personality and social psychology*, 36, 917.
- BROCK, A. M. & O'SULLIVAN, P. 1985. From wife to widow: Role transition in the elderly. *Journal of psychosocial nursing and mental health services*, 23, 6-12.
- BURKE, R. J. 1986. Reemployment on a poorer job after a plant closing. *Psychological Reports*, 58, 559-570.
- BURMASTER, K. B., LANDEFELD, J. C., REHKOPF, D. H., LAHIFF, M., SOKAL-GUTIERREZ, K., ADLER-MILSTEIN, S. & FERNALD, L. C. 2015. Impact of a private sector living wage intervention on depressive symptoms among apparel workers in the Dominican Republic: a quasi-experimental study. *BMJ Open*, 5, e007336.
- BUTTKE, D., VAGI, S., SCHNALL, A., BAYLEYEGN, T., MORRISON, M., ALLEN, M. & WOLKIN, A. 2012. Community Assessment for Public Health Emergency Response (CASPER) one year following the Gulf Coast oil spill: Alabama and Mississippi, 2011. *Prehospital & Disaster Medicine*, 27, 496-502.
- CAI, S. & PARK, A. 2016. Permanent income and subjective well-being. *Journal of Economic Behavior & Organization*, 130, 298-319.

- CASEY, P., GOOLSBY, S., BERKOWITZ, C., FRANK, D., COOK, J., CUTTS, D., BLACK, M. M., ZALDIVAR, N., LEVENSON, S., HEEREN, T. & MEYERS, A. 2004. Maternal Depression, Changing Public Assistance, Food Security, and Child Health Status. *Pediatrics*, 113, 298-304.
- CESARINI, D., LINDQVIST, E., OSTLING, R. & WALLACE, B. 2016. WEALTH, HEALTH, AND CHILD DEVELOPMENT: EVIDENCE FROM ADMINISTRATIVE DATA ON SWEDISH LOTTERY PLAYERS. *Quarterly Journal of Economics*, 131, 687-738.
- CHEUNG, F. & LUCAS, R. E. 2015. When does money matter most? Examining the association between income and life satisfaction over the life course. *Psychology and aging*, 30, 120.
- CHIEN, I. C., CHOU, F. H.-C., CHOU, P., HUANG, M.-W., LU, M.-K., OU-YANG, W.-C. & SU, T. T.-P. 2004. Quality of life and related risk factors in a Taiwanese Village population 21 months after an earthquake. *Australian and New Zealand Journal of Psychiatry*, 38, 358-364.
- CHIN, W. S., GUO, Y. L., LIAO, S. C., WU, H. C., KUO, C. Y., CHEN, C. C. & SHIAO, J. S. 2018. Quality of life at 6 years after occupational injury. *Quality of Life Research*, 27, 609-618.
- CHROSTEK, P. 2016. An Empirical Investigation into the Determinants and Persistence of Happiness and Life Evaluation. *Journal of Happiness Studies*, 17, 413-430.
- CLARK, A. E., D'AMBROSIO, C. & GHISLANDI, S. 2016. Adaptation to poverty in long-run panel data. *Review of Economics and Statistics*, 98, 591-600.
- CLINGINGSMITH, D. 2016. Negative emotions, income, and welfare: Causal estimates from the PSID. *Journal of Economic Behavior & Organization*, 130, 1-19.
- COLEY, R. L. & LOMBARDI, C. M. 2014. Low-income women's employment experiences and their financial, personal, and family well-being. *Journal of Family Psychology*, 28, 88-97.
- COSTELLO, E. J., ERKANLI, A., COPELAND, W. & ANGOLD, A. 2010. Association of Family Income Supplements in Adolescence With Development of Psychiatric and Substance Use Disorders in Adulthood Among an American Indian Population. *Jama-Journal of the American Medical Association*, 303, 1954-1960.
- COURTIN, E., MUENNIG, P., VERMA, N., RICCIO, J. A., LAGARDE, M., VINEIS, P., KAWACHI, I. & AVENDANO, M. 2018. Conditional Cash Transfers And Health Of Low-Income Families In The US: Evaluating The Family Rewards Experiment. *Health Affairs*, 37, 438-446.
- DALEY, A. 2017. Income and the mental health of Canadian mothers: Evidence from the Universal Child Care Benefit. *Ssm-Population Health*, 3, 674-683.
- DANG, H.-A. H., LOKSHIN, M. M. & ABANOKOVA, K. 2019. Did the Poor Adapt to Their Circumstances? Evidence from Long-run Russian Panel Data. *Economics Bulletin*, 39, 2258-2274.
- DEARING, E., TAYLOR, B. A. & MCCARTNEY, K. 2004. Implications of family income dynamics for women's depressive symptoms during the first 3 years after childbirth. *American Journal of Public Health*, 94, 1372-7.
- DIENER, E., SANDVIK, E., SEIDLITZ, L. & DIENER, M. 1993. THE RELATIONSHIP BETWEEN INCOME AND SUBJECTIVE WELL-BEING - RELATIVE OR ABSOLUTE. *Social Indicators Research*, 28, 195-223.
- DOLAN, P. & LORDAN, G. 2013. Moving Up and Sliding Down: An Empirical Assessment of the Effect of Social Mobility on Subjective Wellbeing. Centre for Economic Performance, LSE, CEP Discussion Papers.
- DORSETT, R. & OSWALD, A. J. 2014. HUMAN WELL-BEING AND IN-WORK BENEFITS: A RANDOMIZED CONTROLLED TRIAL. University of Warwick, Department of Economics, The Warwick Economics Research Paper Series (TWERPS).

- ELWELL-SUTTON, T., FOLB, N., CLARK, A., FAIRALL, L. R., LUND, C. & BACHMANN, M. O. 2019. Socioeconomic position and depression in South African adults with long-term health conditions: a longitudinal study of causal pathways. *Epidemiology & Psychiatric Science*, 28, 199-209.
- ERIXSON, O. 2017. Health responses to a wealth shock: evidence from a Swedish tax reform. *Journal of Population Economics*, 30, 1281-1336.
- EVANS, S. & HUXLEY, P. 2005. Adaptation, response-shift and quality of life ratings in mentally well and unwell groups. *Quality of Life Research*, 14, 1719-32.
- EVANS, W. N. & GARTHWAITE, C. L. 2010. Giving Mom a Break: The Impact of Higher EITC Payments on Maternal Health. *National Bureau of Economic Research Working Paper Series*, No. 16296.
- FANG, Z. & NIIMI, Y. 2015. Do Losses Bite More than Gains? Evidence from a Panel Quantile Regression Analysis of Subjective Well-being in Japan. Nanyang Technological University, School of Humanities and Social Sciences, Economic Growth Centre, Economic Growth Centre Working Paper Series: 1507.
- FEENY, S., MCDONALD, L. & POSSO, A. 2014. Are Poor People Less Happy? Findings from Melanesia. *World Development*, 64, 448-459.
- FENN, B., NOURA, G., SIBSON, V., DOLAN, C. & SHOHAM, J. 2015. The role of unconditional cash transfers during a nutritional emergency in Maradi region, Niger: a pre-post intervention observational study. *Public Health Nutrition*, 18, 343-51.
- FERNALD, L. C. & HIDROBO, M. 2011. Effect of Ecuador's cash transfer program (Bono de Desarrollo Humano) on child development in infants and toddlers: a randomized effectiveness trial. *Social science & medicine*, 72, 1437-1446.
- FRIJTERS, P., JOHNSTON, D. W. & SHIELDS, M. A. 2011. Life Satisfaction Dynamics with Quarterly Life Event Data. *Scandinavian Journal of Economics*, 113, 190-211.
- FRIJTERS, P., JOHNSTON, D. W. & SHIELDS, M. A. 2012. The Optimality of Tax Transfers: What does Life Satisfaction Data Tell Us? *Journal of Happiness Studies*, 13, 821-832.
- GALAMA, T. J., MORGAN, R. & SAAVEDRA, J. E. 2017. Wealthier, Happier and More Self-Sufficient: When Anti-Poverty Programs Improve Economic and Subjective Wellbeing at a Reduced Cost to Taxpayers. National Bureau of Economic Research, Inc, NBER Working Papers: 24090.
- GASSMAN-PINES, A. & YOSHIKAWA, H. 2006. Five-year effects of an anti-poverty program on marriage among never-married mothers. *Journal of Policy Analysis and Management*, 25, 11-30.
- GENNETIAN, L. A. & MILLER, C. 2002. Children and welfare reform: A view from an experimental welfare program in Minnesota. *Child development*, 73, 601-620.
- GRATTAN, L. M., BRUMBACK, B., ROBERTS, S. M., BUCKINGHAM-HOWES, S., TOBEN, A. C. & MORRIS, G. 2017. "Bouncing back" after the Deepwater Horizon oil spill. *Disaster Prevention and Management*, 26, 122-133.
- GREEN, E. P., BLATTMAN, C., JAMISON, J. & ANNAN, J. 2016. Does poverty alleviation decrease depression symptoms in post-conflict settings? A cluster-randomized trial of microenterprise assistance in Northern Uganda. *Global Mental Health*, 3, 9.
- GROS, C., BAILEY, M., SCHWAGER, S., HASSAN, A., ZINGG, R., UDDIN, M. M., SHAHJAHAN, M., ISLAM, H., LUX, S., JAIME, C. & DE PEREZ, E. C. 2019. Household-level effects of providing forecast-based cash in anticipation of extreme weather events: Quasi-experimental evidence from humanitarian interventions in the 2017 floods in Bangladesh. *International Journal of Disaster Risk Reduction*, 41.

- GULAL, F. & AYAITA, A. 2019. The Impact of Minimum Wages on Well-Being: Evidence from a Quasi-experiment in Germany. *Journal of Happiness Studies*, 24.
- HANDA, S., PARK, M., DARKO, R. O., OSEI-AKOTO, I., DAVIS, B. & DAIDONE, S. 2014. Livelihood empowerment against poverty program impact evaluation. *Carolina Population Center, Chapel Hill, NC: University of North Carolina*.
- HANLY, P., MAGUIRE, R., HYLAND, P. & SHARP, L. 2015. Examining the role of subjective and objective burden in carer health-related quality of life: the case of colorectal cancer. *Supportive Care in Cancer*, 23, 1941-9.
- HASAN, H. 2016. Does Happiness Adapt to Increase in Income? Evidence from Pakistan Socio-economic Survey (1998-2001). *Pakistan Development Review*, 55, 113-122.
- HAUSHOFER, J. & SHAPIRO, J. 2016. The Short-term Impact of Unconditional Cash Transfers to the Poor: Experimental Evidence from Kenya. *Quarterly Journal of Economics*, 131, 1973-2042.
- HILTON, J. M. & KOPERA-FRYE, K. 2006. Loss and Depression in Cohabiting and Noncohabiting Custodial Single Parents. *The Family Journal*, 14, 28-40.
- HJELM, L., HANDA, S., DE HOOP, J. & PALERMO, T. 2017. Poverty and perceived stress: Evidence from two unconditional cash transfer programs in Zambia. *Social Science & Medicine*, 177, 110-117.
- HORN, B. P., MACLEAN, J. C. & STRAIN, M. R. 2017. DO MINIMUM WAGE INCREASES INFLUENCE WORKER HEALTH? *Economic Inquiry*, 55, 1986-2007.
- HUANG, Y., WONG, H. & TAN, N. T. 2015. Associations between economic loss, financial strain and the psychological status of Wenchuan earthquake survivors. *Disasters*, 39, 795-810.
- ISHIGURO, A., INOUE, M., FISHER, J., INOUE, M., MATSUMOTO, S. & YAMAOKA, K. 2019. Gender-Based Risk and Protective Factors for Psychological Distress in the Midterm Recovery Period Following the Great East Japan Earthquake. *Disaster Medicine and Public Health Preparedness*, 13, 487-496.
- JALAL, C. S., FRONGILLO, E. A. & WARREN, A. M. 2015. Food Insecurity Mediates the Effect of a Poverty-Alleviation Program on Psychosocial Health among the Ultra-Poor in Bangladesh. *Journal of Nutrition*, 145, 1934-41.
- JUNNA, L., MOUSTGAARD, H., TARKIAINEN, L. & MARTIKAINEN, P. 2019. The Association Between Income and Psychotropic Drug Purchases: Individual Fixed Effects Analysis of Annual Longitudinal Data in 2003-2013. *Epidemiology*, 30, 221-229.
- KENDALL, G. E., NGUYEN, H. & ONG, R. 2019. The association between income, wealth, economic security perception, and health: a longitudinal Australian study. *Health Sociology Review*, 28, 20-38.
- KIERNAN, F. 2018. The Great Recession and Mental Health: the Effect of Income Loss on the Psychological Health of Young Mothers. Geary Institute, University College Dublin, Working Papers: 201821.
- KIKUCHI, H., MIFUNE, N., NIINO, M., KIRA, J. I., KOHRIYAMA, T., OTA, K., TANAKA, M., OCHI, H., NAKANE, S. & KIKUCHI, S. 2013. Structural equation modeling of factors contributing to quality of life in Japanese patients with multiple sclerosis. *BMC Neurology*, 13 (no pagination).
- KILBURN, K., HANDA, S., ANGELES, G., TSOKA, M. & MVULA, P. 2018. Paying for Happiness: Experimental Results from a Large Cash Transfer Program in Malawi. *Journal of Policy Analysis and Management*, 37, 331-+.
- KILBURN, K., THIRUMURTHY, H., HALPERN, C. T., PETTIFOR, A. & HANDA, S. 2016. Effects of a Large-Scale Unconditional Cash Transfer Program on Mental Health Outcomes of Young People in Kenya. *Journal of Adolescent Health*, 58, 223-9.

- KLEIN, J., LUDECKE, D., HOFREUTER-GATGENS, K., FISCH, M., GRAEFEN, M. & VON DEM KNESEBECK, O. 2017. Income and health-related quality of life among prostate cancer patients over a one-year period after radical prostatectomy: a linear mixed model analysis. *Quality of Life Research*, 26, 2363-2373.
- KOLTAI, J., BIERMAN, A. & SCHIEMAN, S. 2018. Financial circumstances, mastery, and mental health: Taking unobserved time-stable influences into account. *Social Science & Medicine*, 202, 108-116.
- KRAUSS, A. & GRAHAM, C. 2013. Subjective wellbeing in Colombia : some insights on vulnerability, job security, and relative incomes. The World Bank, Policy Research Working Paper Series: 6672.
- KUHN, P., KOOREMAN, P., SOETEVENT, A. & KAPTEYN, A. 2011. The effects of lottery prizes on winners and their neighbors: Evidence from the Dutch postcode lottery. *American Economic Review*, 101, 2226-47.
- LACHOWSKA, M. 2017. The Effect of Income on Subjective Well-Being Evidence from the 2008 Economic Stimulus Tax Rebates. *Journal of Human Resources*, 52, 374-417.
- LAFAVE, H. G., DE SOUZA, H. R., PRINCE, P. N., ATCHISON, K. E. & GERBER, G. J. 1995. Partnerships for people with serious mental illness who live below the poverty line. *Psychiatric Services*.
- LAM, J. A. & ROSENHECK, R. A. 2000. Correlates of improvement in quality of life among homeless persons with serious mental illness. *Psychiatric Services*, 51, 116-8.
- LATIF, E. 2015. Happiness Adaptation to Income: Evidence from Canada. *Economics Bulletin*, 35, 1477-1487.
- LEBIHAN, L. & MAO TAKONGMO, C.-O. 2018. The Impact of Universal Child Benefits on Family Health and Behaviours. *Research in Economics*, 72, 415-427.
- LINDAHL, M. 2005. Estimating the effect of income on health and mortality using lottery prizes as an exogenous source of variation in income. *Journal of Human resources*, 40, 144-168.
- LINDQVIST, E., OSTLING, R. H. & CESARINI, D. 2018. Long-run Effects of Lottery Wealth on Psychological Well-being. National Bureau of Economic Research, Inc, NBER Working Papers: 24667.
- LORANT, V., CROUX, C., WEICH, S., DELIÈGE, D., MACKENBACH, J. & ANSSEAU, M. 2007. Depression and socio-economic risk factors: 7-year longitudinal population study. *The British journal of psychiatry*, 190, 293-298.
- LORENZ, F. O., ELDER, G. H., BAO, W. N., WICKRAMA, K. A. S. & CONGER, R. D. 2000. After farming: Emotional health trajectories of farm, nonfarm, and displaced farm couples. *Rural Sociology*, 65, 50-71.
- MACOURS, K., SCHADY, N. & VAKIS, R. 2012. Cash transfers, behavioral changes, and cognitive development in early childhood: evidence from a randomized experiment. *American Economic Journal: Applied Economics*, 4, 247-73.
- MAEDER, M. 2014. Earnings-related parental leave benefits and subjective well-being of young mothers: evidence from a German parental leave reform. Bavarian Graduate Program in Economics (BGPE).
- MARKUSSEN, T. & NGO, Q.-T. 2019. Economic and Non-economic Returns to Communist Party Membership in Vietnam. *World Development*, 122, 370-384.
- MCCARTHY, B., CARTER, A., JANSSON, M., BENOIT, C. & FINNIGAN, R. 2018. Poverty, Material Hardship, and Mental Health among Workers in Three Front-Line Service Occupations. *Journal of Poverty*, 22, 334-354.
- MCKENZIE, S. K., GUNASEKARA, F. I., RICHARDSON, K. & CARTER, K. 2014. Do changes in socioeconomic factors lead to changes in mental health? Findings from three waves of a population based panel study. *Journal of epidemiology and community health*, 68, 253-260.

- MELZER, S. M. & MUFFELS, R. J. 2017. Migrants' pursuit of happiness: An analysis of the effects of adaptation, social comparison and economic integration on subjective well-being on the basis of German panel data for 1990-2014. *Migration Studies*, 5, 190-215.
- MILLIGAN, K. & STABILE, M. 2008. Do Child Tax Benefits Affect the Wellbeing of Children? Evidence from Canadian Child Benefit Expansions. National Bureau of Economic Research, Inc, NBER Working Papers: 14624.
- MOHANTY, M. S. 2014. What Determines Happiness? Income or Attitude: Evidence from the U.S. Longitudinal Data. *Journal of Neuroscience, Psychology, and Economics*, 7, 80-102.
- NATALI, L., HANDA, S., PETERMAN, A., SEIDENFELD, D. & TEMBO, G. 2018. Does money buy happiness? Evidence from an unconditional cash transfer in Zambia. *SSM - Population Health*, 4, 225-235.
- NORTH, R. J., HOLAHAN, C. J., MOOS, R. H. & CRONKITE, R. C. 2008. Family support, family income, and happiness: A 10-year perspective. *Journal of Family Psychology*, 22, 475-483.
- ONG, R., NGUYEN, T. & KENDALL, G. 2018. The impact of intergenerational financial transfers on health and wellbeing outcomes: A longitudinal study. *Social Science & Medicine*, 214, 179-186.
- OSHIO, T., UMEDA, M. & FUJII, M. 2012. The association between income dynamics and subjective well-being: Evidence from career income records in Japan. Center for Intergenerational Studies, Institute of Economic Research, Hitotsubashi University.
- OZER, E. J., FERNALD, L. C. H., WEBER, A., FLYNN, E. P. & VANDERWEELE, T. J. 2011. Does alleviating poverty affect mothers' depressive symptoms? A quasi-experimental investigation of Mexico's Oportunidades programme. *International Journal of Epidemiology*, 40, 1565-1576.
- PLAGERSON, S., PATEL, V., HARPHAM, T., KIELMANN, K. & MATHEE, A. 2011. Does money matter for mental health? Evidence from the Child Support Grants in Johannesburg, South Africa. *Global Public Health*, 6, 760-76.
- POWELL-JACKSON, T., PEREIRA, S. K., DUTT, V., TOUGHER, S., HALDAR, K. & KUMAR, P. 2016. Cash transfers, maternal depression and emotional well-being: Quasi-experimental evidence from India's Janani Suraksha Yojana programme. *Social Science & Medicine*, 162, 210-8.
- PRIEBE, S., YEELES, K., BREMNER, S., LAUBER, C., ELDRIDGE, S., ASHBY, D., DAVID, A. S., O'CONNELL, N., FORREST, A. & BURNS, T. 2013. Effectiveness of financial incentives to improve adherence to maintenance treatment with antipsychotics: Cluster randomised controlled trial. *BMJ (Online)*, 347.
- PROTO, E. & RUSTICHINI, A. 2015. Life satisfaction, income and personality. *Journal of Economic Psychology*, 48, 17-32.
- RADEY, M., MCWEY, L. & CUI, M. 2019. Psychological distress among low-income mothers: the role of public and private safety nets. *Women & Health*, 15.
- RASCHKE, C. 2019. Unexpected windfalls, education, and mental health: evidence from lottery winners in Germany. *Applied Economics*, 51, 207-218.
- REEVE, J., JAMES, F., MCNEILL, R., BROWN, P., CAMERON, L. & MILLS, S. 2011. Functional and psychological outcomes following burn injury: reduced income and hidden emotions are predictors of greater distress. *Journal of Burn Care & Research*, 32, 468-74.
- REEVES, A., CLAIR, A., MCKEE, M. & STUCKLER, D. 2016. Reductions in the United Kingdom's government housing benefit and symptoms of depression in low-income households. *American journal of epidemiology*, 184, 421-429.

- REEVES, A., MCKEE, M., MACKENBACH, J., WHITEHEAD, M. & STUCKLER, D. 2017. Introduction of a National Minimum Wage Reduced Depressive Symptoms in Low-Wage Workers: A Quasi-Natural Experiment in the UK. *Health Economics*, 26, 639-655.
- ROBERT, G., MARTINEZ, J. M., GARCIA, A. M., BENAVIDES, F. G. & RONDA, E. 2014. From the boom to the crisis: changes in employment conditions of immigrants in Spain and their effects on mental health. *European Journal of Public Health*, 24, 404-9.
- ROGERS, S. J. & DEBOER, D. D. 2001. Changes in wives' income: Effects on marital happiness, psychological well-being, and the risk of divorce. *Journal of Marriage and Family*, 63, 458-472.
- ROH, Y. H., CHANG, J. Y., KIM, M. U. & NAM, S. K. 2014. The Effects of Income and Skill Utilization on the Underemployed's Self-Esteem, Mental Health, and Life Satisfaction. *Journal of Employment Counseling*, 51, 125-141.
- ROSENHECK, R. A., DAUSEY, D. J., FRISMAN, L. & KASPROW, W. 2000. Outcomes after initial receipt of social security benefits among homeless veterans with mental illness. *Psychiatric Services*, 51, 1549-54.
- SAREEN, J., AFIFI, T. O., MCMILLAN, K. A. & ASMUNDSON, G. J. G. 2011. Relationship between household income and mental disorders: Findings from a population-based longitudinal study. *Archives of General Psychiatry*, 68, 419-427.
- SCHOLLGEN, I., KERSTEN, N. & ROSE, U. 2019. Income trajectories and subjective well-being: Linking administrative records and survey data. *International Journal of Environmental Research and Public Health*, 16.
- SCHYNS, P. 2001. Income and satisfaction in Russia. *Journal of Happiness Studies: An Interdisciplinary Forum on Subjective Well-Being*, 2, 173-204.
- SEKULOVA, F. & VAN DEN BERGH, J. 2013. Climate change, income and happiness: An empirical study for Barcelona. *Global Environmental Change-Human and Policy Dimensions*, 23, 1467-1475.
- SWIFT, S. L., ELFASSY, T., BAILEY, Z., FLOREZ, H., FEASTER, D. J., CALONICO, S., SIDNEY, S., KIEFE, C. I. & AL HAZZOURI, A. Z. 2020. Association of negative financial shocks during the Great Recession with depressive symptoms and substance use in the USA: the CARDIA study. *J Epidemiol Community Health*, 74, 995-1001.
- TACHIBANA, T., GOTO, R., SAKURAI, T., RAYAMAJHI, S., ADHIKARI, A. & DOW, W. H. 2019. Do remittances alleviate negative impacts of disaster on mental health? A case of the 2015 Nepal earthquake. *Social Science & Medicine*, 238.
- THOITS, P. & HANNAN, M. 1979. Income and psychological distress: The impact of an income-maintenance experiment. *Journal of Health and Social Behavior*, 20, 120-138.
- THOMPSON, S., HARTEL, G., MANDERSON, L., WOELZ-STIRLING, N. & KELAHER, M. 2002. The mental health status of Filipinas in Queensland. *Australian & New Zealand Journal of Psychiatry*, 36, 674-80.
- TURVEY, C., STROMQUIST, A., KELLY, K., ZWERLING, C. & MERCHANT, J. 2002. Financial loss and suicidal ideation in a rural community sample. *Acta Psychiatrica Scandinavica*, 106, 373-380.
- WICKHAM, S., WHITEHEAD, M., TAYLOR-ROBINSON, D. & BARR, B. 2017. The effect of a transition into poverty on child and maternal mental health: a longitudinal analysis of the UK Millennium Cohort Study. *The lancet. Public Health*, 2, e141-e148.
- WONG, H. & YE, S. 2015. Impact of enforcing a statutory minimum wage on work and quality of life of vulnerable groups in Hong Kong. *International Journal of Social Welfare*, 24, 223-235.

YOUNG, H. Y., YOUNG, S. R., IM, O. K., JUNG, S. L., SOO, M. B., WON, S. L., JUN, S. K., SI, Y. K., SANG, W. S. & YOUNG, S. H. 2005. Economic burdens and quality of life of family caregivers of cancer patients. *Oncology*, 68, 107-114.

ZIMMERMAN, F. J. & KATON, W. 2005. Socioeconomic status, depression disparities, and financial strain: what lies behind the income-depression relationship? *Health Economics*, 14, 1197-215.



**Table D1: Included studies and their characteristics.** Pov? = studies which consider impact of poverty transitions. Co-Is? = studies which include important co-interventions (for the exposed group only). Time = number of months between start of intervention and outcome measurement (where study included >1 timepoint, time reported is that used in primary analysis). DPs = datapoints. ED = effect direction (beneficial [Ben.], inconsistent [Inc.], or harmful [Har.]). MA? = studies which were included in meta-analysis. Country codes = ISO Alpha-3.

| Study       | Title                                                                                                                 | Country | Years     | Study design                         | Sampling frame & sample size                                                                                                                            | Intervention                                                                                                                                                                              | Pov? | Co-Is? | Time | Outcome                                                                                                                                                                     | No. DPs | ED   | Findings                                                                                                                                                                                                   | Risk of bias | MA? |
|-------------|-----------------------------------------------------------------------------------------------------------------------|---------|-----------|--------------------------------------|---------------------------------------------------------------------------------------------------------------------------------------------------------|-------------------------------------------------------------------------------------------------------------------------------------------------------------------------------------------|------|--------|------|-----------------------------------------------------------------------------------------------------------------------------------------------------------------------------|---------|------|------------------------------------------------------------------------------------------------------------------------------------------------------------------------------------------------------------|--------------|-----|
| Abbott 2000 | Welfare benefits advice in primary care: evidence of improvements in health                                           | GBR     | 1996-1997 | Non-randomised trial of intervention | Welfare benefits advice service users in seven Liverpool GP practices (n=68)                                                                            | If incomes <b>increased</b> 6 months after initial attendance at the Health and Advice Project, a GP practice-based welfare benefits advice service managed by the Citizens Advice Bureau | No   | No     | 12   | Short form 36 (SF-36) mental health subscale                                                                                                                                | 2       | Ben. | There were significant difference in pre/post intervention scores between those whose incomes increased and those whose incomes didn't following benefits advice service                                   | Critical     | Yes |
| Abbott 2006 | What is the impact on individual health of services in general practice settings which offer welfare benefits advice? | GBR     | 2000-2001 | Non-randomised trial of intervention | Welfare benefits advice service users in seven sites: 59 GP practices across England (n=244)                                                            | If participants had successfully claimed and appealed, resulting in an income <b>increase</b> , 6 months after attendance at a welfare advice service based in their GP practice          | No   | No     | 12   | SF-36 mental health subscale                                                                                                                                                | 2       | Inc. | Those whose incomes increased within 6 months of using benefits advice service did not see significant improvement in SF-36 score by 6 months, but did by 12 months                                        | Critical     | Yes |
| Abel 2016   | Financial Hardship and Patient-Reported Outcomes after Hematopoietic Cell Transplantation                             | USA     | 2014-2015 | Basic cross-sectional                | All adult patients (18+) surviving 150 days after hematopoietic cell transplant (HCT) at three cancer centres in Boston, Arizona and Buffalo NY (n=325) | Experiencing a <b>decrease</b> in monthly household income compared with the period before undergoing HCT                                                                                 | No   | No     | 6    | 1. Perceived Stress Scale-4 (PSS) 2. Quality of life (QoL) score on a 7-point self assessment scale using 'similar wording as global health status domain of EORTC QLQ-C30' | 2       | Ben. | After stem cell transplant for haematological cancers, those who experienced income reduction after surviving ~173 days had increased odds of stress and better QoL, though the latter was not significant | Critical     | Yes |
| Adams 2019  | Temporal dimensions of reported life satisfaction in a low-income, agricultural environment                           | BGD     | 2015-2016 | Basic longitudinal                   | Farmers in two upazilas (subdistricts) in the Rangpur division of northwestern Bangladesh (n=353)                                                       | Presence of household income shocks such as death or illness of a main income earner ( <b>decrease</b> )                                                                                  | No   | Yes    | 0.5  | Life satisfaction, 11 point scale (Cantril self-anchoring scale)                                                                                                            | 2       | Inc. | Income shocks in the current period and two week lagged period for Bangladeshi agricultural workers were not significantly associated with life satisfaction                                               | Serious      | No  |

|               |                                                                                                    |     |           |                                      |                                                                                                                                                          |                                                                                                                                                                                                       |     |    |    |                                                                                                                             |    |      |                                                                                                                                                                                                       |          |     |
|---------------|----------------------------------------------------------------------------------------------------|-----|-----------|--------------------------------------|----------------------------------------------------------------------------------------------------------------------------------------------------------|-------------------------------------------------------------------------------------------------------------------------------------------------------------------------------------------------------|-----|----|----|-----------------------------------------------------------------------------------------------------------------------------|----|------|-------------------------------------------------------------------------------------------------------------------------------------------------------------------------------------------------------|----------|-----|
| Adeola 2009   | Mental Health & Psychosocial Distress Sequelae of Katrina: An Empirical Study of Survivors         | USA | 2006      | Basic cross-sectional                | Adults (18+) who survived Hurricane Katrina and requested aid from the Red Cross (n=602)                                                                 | The impact of Hurricane Katrina on personal finances rated on a 5-point Likert scale ( <b>decrease</b> )                                                                                              | No  | No | 0  | Composite measure indicating acute psychological distress                                                                   | 1  | Ben. | Survivors of Hurricane Katrina had higher levels of psychological distress if they experienced more of an impact of the disaster on their finances                                                    | Critical | No  |
| AIR 2014      | 12-Month Impact Report for Zimbabwe's Harmonised Social Cash Transfer Programmes                   | ZWE | 2013-2014 | Non-randomised trial of intervention | Zimbabwean households that were labour constrained and food poor. Included adolescent respondents (aged 14-21 at follow-up) and household head (n=3,430) | Receiving the HSCT cash transfer, ranging from US\$10-\$25 depending on household size (approx. \$5 per person) - represents <b>increase</b> of 20% of household consumption.                         | Yes | No | 12 | 1. Center for Epidemiological Studies Depression scale, 10 item version (CES-D 10) 2. Diener's Satisfaction with Life Scale | 3  | Inc. | Cash transfer scheme had no significant impact on adolescent depression, but did have an impact on adult life satisfaction                                                                            | Low      | Yes |
| Allouche 2019 | Psychological Well-Being and the Dynamics of Poverty                                               | ZAF | 2008-2014 | Basic longitudinal                   | South African population aged 16+ (n=6,314)                                                                                                              | Within-person <b>change</b> in household income per capita between waves                                                                                                                              | No  | No | 24 | CES-D 10                                                                                                                    | 3  | Ben. | In South African panel data, within-person changes in income resulted in significant changes to CES-D score which were more pronounced for the poorest 20% of the population                          | Serious  | Yes |
| Ambrey 2014   | The causal effect of income on life satisfaction and the implications for valuing non-market goods | AUS | 2002-2011 | Basic longitudinal                   | Australian population (n=23,157)                                                                                                                         | Within-person <b>changes</b> in restricted windfall income (e.g. lottery win) and within-person <b>changes</b> in household income (latter used for meta-analysis for consistency with other studies) | No  | No | 12 | Life satisfaction, 10 point scale                                                                                           | 2  | Ben. | Windfall payments were associated with increases in life satisfaction, though these were extremely small compared with the impact of changes in household income                                      | Serious  | Yes |
| Apouey 2015   | Winning big but feeling no better? The effect of lottery prizes on physical and mental health      | GBR | 1996-2008 | Other natural experiment             | UK population (n=16,645)                                                                                                                                 | Winning the lottery within the last one or two years, categorised as (1) Any win, (2) Big win (>£500) win and (3) Log(prize) ( <b>increase</b> )                                                      | No  | No | 12 | 1. General Health Questionnaire (GHQ) 2. Life satisfaction, 7 point scale                                                   | 12 | Ben. | Winning a large lottery prize in the last 2 years was associated with a significant increase in both GHQ score and life satisfaction. The same was true for log(prize) when all prizes were included. | Serious  | Yes |

|                |                                                                                                                         |     |           |                                  |                                                                                                               |                                                                                                                                                                             |     |     |     |                                                                                           |    |      |                                                                                                                                                                                                                                   |               |     |
|----------------|-------------------------------------------------------------------------------------------------------------------------|-----|-----------|----------------------------------|---------------------------------------------------------------------------------------------------------------|-----------------------------------------------------------------------------------------------------------------------------------------------------------------------------|-----|-----|-----|-------------------------------------------------------------------------------------------|----|------|-----------------------------------------------------------------------------------------------------------------------------------------------------------------------------------------------------------------------------------|---------------|-----|
|                |                                                                                                                         |     |           |                                  |                                                                                                               |                                                                                                                                                                             |     |     |     |                                                                                           |    |      | Winning within the last one year was less clearly associated with improvement.                                                                                                                                                    |               |     |
| Arata 2000     | Coping with Technological Disaster: An Application of the Conservation of Resources Model to the Exxon Valdez Oil Spill | USA | 1995      | Basic cross-sectional            | Members of the Cordova District Fishermen United in 1989 (n=125)                                              | Experiencing an 'income loss spiral' following the oil spill, i.e. loss of income in 3 or more of the 6 years following the spill <b>(decrease)</b>                         | No  | No  | 72  | Symptom Checklist 90 Revised (SCL90-R) - subscale scores for anxiety, depression and PTSD | 3  | Ben. | Experiencing an income loss spiral following an Alaska oil spill was correlated with anxiety, depression and PTSD symptoms in fishermen                                                                                           | Critical      | No  |
| Araya 2003     | Education and income: Which is more important for mental health?                                                        | CHL | 1996-1998 | Basic cross-sectional            | Adult population living in private households of Santiago, Chile (n=3,870)                                    | Household experienced a significant <b>decrease</b> in income over the past six months                                                                                      | No  | No  | 6   | Revised Clinical Interview Schedule (CIS-R)                                               | 1  | Ben. | Experiencing a significant drop in household income in the last six months was associated with two-fold increase in likely common mental disorder                                                                                 | Critical      | Yes |
| Asadullah 2012 | Subjective well-being and relative poverty in rural Bangladesh                                                          | BGD | 2008      | Basic cross-sectional            | Rural Bangladesh population (n=2,318)                                                                         | Household did NOT experience adverse economic shock in the last 12 months <b>(decrease)</b>                                                                                 | No  | No  | 12  | Life satisfaction, 10 point scale                                                         | 3  | Ben. | Experiencing an adverse economic shock in the past 12 months was not associated with life satisfaction in rural Bangladesh                                                                                                        | Critical      | No  |
| Assari 2018    | Education and income predict future emotional well-being of whites but not blacks: A ten-year cohort                    | USA | 1995-2005 | Basic longitudinal               | Population of continental United States with a telephone number (n=3,731)                                     | <b>Change</b> in income compared with income 10 years prior at baseline                                                                                                     | No  | No  | 120 | Positive and negative affect, measured using Mroczek & Kolarz scale                       | 4  | Ben. | Showed significant relationship between income change over 10 year period (2 measurements) and positive/negative affect for white participants in a panel, but not black participants                                             | Serious       | No  |
| Baird 2013     | Income Shocks and Adolescent Mental Health                                                                              | MWI | 2007-2010 | Randomised trial of intervention | Never married females aged 13-22 living in Zomba district. Mixture of school dropouts and attendees (n=2,827) | Cash transfer both to parents and directly to girl, plus payment of secondary school fees direct to school - varied amounts. Payments were conditional on school attendance | Yes | Yes | 12  | GHQ                                                                                       | 18 | Inc. | Cash transfers reduced psychological distress among baseline schoolgirls, but not baseline dropouts. The large beneficial effects declined with increases in the transfer amount offered to the parents. Effects measured shortly | Some concerns | Yes |

|                |                                                                                                                      |     |           |                                  |                                                                                                                                            |                                                                                                                                                                                                                                                                                           |     |     |    |                                                                                                                                                                 |   |      |                                                                                                                                                                |               |     |
|----------------|----------------------------------------------------------------------------------------------------------------------|-----|-----------|----------------------------------|--------------------------------------------------------------------------------------------------------------------------------------------|-------------------------------------------------------------------------------------------------------------------------------------------------------------------------------------------------------------------------------------------------------------------------------------------|-----|-----|----|-----------------------------------------------------------------------------------------------------------------------------------------------------------------|---|------|----------------------------------------------------------------------------------------------------------------------------------------------------------------|---------------|-----|
|                |                                                                                                                      |     |           |                                  |                                                                                                                                            | except in unconditional arm of trial <b>(increase)</b>                                                                                                                                                                                                                                    |     |     |    |                                                                                                                                                                 |   |      | after transfer ended were non-significant.                                                                                                                     |               |     |
| Barbaglia 2015 | Negative socioeconomic changes and mental disorders: a longitudinal study                                            | NLD | 2007-2012 | Basic longitudinal               | Dutch population aged 18-64 with at least 12h of paid work and no mental illness at baseline, not retired at follow-up (n=3,175)           | Experiencing a substantial reduction in own or partner's income over five year period <b>(decrease)</b>                                                                                                                                                                                   | No  | No  | 36 | 3 year incidence of any mental disorder, mood disorder or anxiety disorder, assessed using Composite International Diagnostic Interview (CIDI), ICD-10 criteria | 2 | Ben. | 3 year incidence of mood disorders and anxiety disorders was higher for those who experienced a substantial income drop, though the latter was non-significant | Moderate      | Yes |
| Becchetti 2010 | The Effects of a Calamity on Income and Wellbeing of Poor Microfinance Borrowers: The Case of the 2004 Tsunami Shock | LKA | 2007      | Basic cross-sectional            | Micro finance institution borrowers from Agro Micro Finance scheme living on the southern coast of Sri Lanka prior to 2004 tsunami (n=242) | The change in real income from pre-Tsunami to post-Tsunami before any refinancing was received from MFI <b>(decrease)</b>                                                                                                                                                                 | No  | Yes | 26 | Life satisfaction, 10 point scale                                                                                                                               | 2 | Ben. | No significant effect of the income change variable following tsunami on life satisfaction                                                                     | Critical      | No  |
| Bedoya 2019    | No Household Left Behind : Afghanistan Targeting the Ultra Poor Impact Evaluation                                    | AFG | 2016-2018 | Randomised trial of intervention | Ultra-poor households in the poorest villages in four districts of Afghanistan's Balkh province (n=1,147)                                  | TUP intervention: transfer of livestock; monthly cash transfer or 15 US\$ per month for 12 months; basic training; health subsidy; fortnightly mentoring visits by social organisers and vets. Cash transfer aimed to be sufficient to support HH with basic food needs <b>(increase)</b> | Yes | Yes | 12 | 1. CES-D 7, 2. Cohen's 4-item stress scale, 3. Happiness - 4 point scale, 4. Life satisfaction - 10 point scale                                                 | 8 | Ben. | There were significant effects of the TUP programme on life satisfaction, happiness, depression and stress, which were larger for women than men               | Some concerns | Yes |
| Benzeval 2001  | Income and health: the time dimension                                                                                | GBR | 1991-1997 | Basic longitudinal               | UK population (n=5,281)                                                                                                                    | 1. Difference between income in wave 6 and wave 1. 2. Experiencing >30% income <b>increase</b> in same period. 3. >30% income <b>decrease</b> in same period                                                                                                                              | No  | No  | 72 | GHQ                                                                                                                                                             | 2 | Ben. | Income change across 6 years was not significantly associated with GHQ, but experiencing a large decrease of >30% had a greater impact                         | Serious       | Yes |

|                      |                                                                                                                                               |     |                           |                       |                                                                                                                                                           |                                                                                                           |    |     |    |                                                                                      |   |      |                                                                                                                                           |          |     |
|----------------------|-----------------------------------------------------------------------------------------------------------------------------------------------|-----|---------------------------|-----------------------|-----------------------------------------------------------------------------------------------------------------------------------------------------------|-----------------------------------------------------------------------------------------------------------|----|-----|----|--------------------------------------------------------------------------------------|---|------|-------------------------------------------------------------------------------------------------------------------------------------------|----------|-----|
| Biotteau 2019        | Risk of Major Depressive Episodes After Separation: The Gender-Specific Contribution of the Income and Support Lost Through Union Dissolution | FRA | 2006-2010                 | Basic longitudinal    | French population aged 20-74 living in private households in relationship at baseline, not students (n=7,321)                                             | Stagnation or <b>decrease</b> in adjusted income since 2006                                               | No | No  | 48 | Mini International Neuropsychiatric Interview: screens for major depressive episodes | 2 | Ben. | Income stagnation or decrease across 4 years was associated with increased odds of depression for women but not men                       | Serious  | Yes |
| Bland 1996           | Long-Term Psychological Effects of Natural Disasters                                                                                          | ITA | 1987                      | Basic cross-sectional | Male employees of Olivetti Factory in Naples (n=174)                                                                                                      | Experiencing financial loss associated with damages following the 1983-84 earthquakes ( <b>decrease</b> ) | No | Yes | 0  | SCL90-R, shortened version (64 items)                                                | 2 | Ben. | Factory workers in Naples who experienced financial loss after 1983/94 earthquakes had poorer global mental health than those who did not | Critical | No  |
| Blazquez-Cuesta 2013 | Does income deprivation affect people's mental well-being?                                                                                    | DEU | 2002-2010                 | Basic longitudinal    | German population (n=5,783)                                                                                                                               | Within-person <b>changes</b> in household income                                                          | No | No  | 12 | SF-12 mental component summary (MCS)                                                 | 2 | Ben. | Transitory income change was associated a significant change in SF-12 MCS for women, but not men                                          | Serious  | Yes |
| Bolden 2010          | Predictors of Mental Health, Subjective Burden, and Rewards in Family Caregivers of Patients With Chronic Liver Disease                       | USA | Not reported: likely 2009 | Basic cross-sectional | Family caregivers of people with chronic liver disease at a University-based hepatology practice in a large south-eastern metropolitan city in USA (n=73) | Income <b>decreased</b> since caring for the patient                                                      | No | No  | 72 | 1. CES-D 20, 2. Hamilton Anxiety Rating scale (HAM-A)                                | 2 | Ben. | Income loss after beginning caring for someone with chronic liver disease was correlated with CES-D score but not HAMA score              | Critical | Yes |
| Bonanno 2007         | What Predicts Psychological Resilience After Disaster? The Role of Demographics, Resources, and Life Stress                                   | USA | 2002                      | Basic cross-sectional | All adults in New York City and contiguous geographic areas in New York State, New Jersey and Lower Fairfield County in Connecticut (n=2,096)             | Income <b>decrease</b> as a result of the September 11th terrorist attack                                 | No | No  | 6  | National Women's Study PTSD module (NWS-PTSD)                                        | 3 | Ben. | Losing income as a result of 9/11 made New Yorkers less likely to be resilient against PTSD or mild/moderate trauma                       | Serious  | Yes |
| Boyce 2009           | Occupation, poverty and                                                                                                                       | GHA | 2006                      | Basic cross-sectional | People with mental illness or                                                                                                                             | Income <b>increased</b> in last 6 months                                                                  | No | No  | 6  | Subjective improvement in                                                            | 1 | Ben. | There was no significant improvement in mental                                                                                            | Critical | Yes |

|                |                                                                                                                                                            |                          |           |                               |                                                                                                                                               |                                                                                                                                                                                                                                         |    |     |    |                                                     |   |      |                                                                                                                                       |          |     |
|----------------|------------------------------------------------------------------------------------------------------------------------------------------------------------|--------------------------|-----------|-------------------------------|-----------------------------------------------------------------------------------------------------------------------------------------------|-----------------------------------------------------------------------------------------------------------------------------------------------------------------------------------------------------------------------------------------|----|-----|----|-----------------------------------------------------|---|------|---------------------------------------------------------------------------------------------------------------------------------------|----------|-----|
|                | mental health improvement in Ghana                                                                                                                         |                          |           |                               | their caregivers who were enrolled in the BasicNeeds programme in Ghana (n=399)                                                               |                                                                                                                                                                                                                                         |    |     |    | mental health in last 6 months vs decline/no change |   |      | health for mentally ill Ghanaians following an income increase                                                                        |          |     |
| Boyce 2013     | Money, well-being, and loss aversion: does an income loss have a greater effect on well-being than an equivalent income gain?                              | GBR                      | 1998-2007 | Basic longitudinal            | UK population (n=20,570)                                                                                                                      | Within-person changes in household income, and income-loss dummy to differentiate between effects of <b>increases/decreases</b>                                                                                                         | No | No  | 12 | GHQ                                                 | 2 | Inc. | No significant improvement in GHQ with income change overall, but the relationship with income decreases did appear to be significant | Serious  | No  |
| Boyce 2018     | The Great Recession and subjective well-being: How did the life satisfaction of people living in the United Kingdom change following the financial crisis? | GBR                      | 2006-2010 | Basic longitudinal            | UK population (n=8,661)                                                                                                                       | <b>Change</b> in household income following the 2008 recession                                                                                                                                                                          | No | No  | 36 | Life satisfaction, 7 point scale                    | 1 | Ben. | Income change post-recession was associated with a change in life satisfaction                                                        | Serious  | Yes |
| Boyd-Swan 2016 | The earned income tax credit, mental health, and happiness                                                                                                 | USA                      | 1987-1994 | Before and after (controlled) | US women aged 16-55 living in households whose primary language is English or Spanish, with education of high school degree or less (n=2,606) | Being affected by changes to Earned Income Tax Credit (EITC) from 1991 to 1994. Resulted in more households receiving EITC and also an <b>increased</b> amount being available for families with 2 or more children for the first time. | No | No  | 0  | 1. CES-D 11, 2. Happiness, 7 point scale            | 2 | Ben. | Expansion of earned income tax credit was not significantly associated with CES-D score or happiness                                  | Serious  | Yes |
| Brenner 2014   | Organizational Downsizing and Depressive Symptoms in the European                                                                                          | FRA<br>HUN<br>SWE<br>GBR | 2009-2011 | Basic cross-sectional         | Workers in small, medium & large companies who experienced recent large downsizing of                                                         | If reported <b>decreased</b> income and benefits after company downsizing                                                                                                                                                               | No | Yes | 0  | SCL90-R, depression subscale                        | 1 | Ben. | Having decreased income and benefits after experiencing a large downsizing events was                                                 | Critical | Yes |

|                |                                                                                        |     |                           |                          |                                                                                                                                                            |                                                                                                                                                                                          |     |     |      |                                                                                                                                                                                                                                      |   |      |                                                                                                                                                                                     |          |     |
|----------------|----------------------------------------------------------------------------------------|-----|---------------------------|--------------------------|------------------------------------------------------------------------------------------------------------------------------------------------------------|------------------------------------------------------------------------------------------------------------------------------------------------------------------------------------------|-----|-----|------|--------------------------------------------------------------------------------------------------------------------------------------------------------------------------------------------------------------------------------------|---|------|-------------------------------------------------------------------------------------------------------------------------------------------------------------------------------------|----------|-----|
|                | Recession: The Experience of Workers in France, Hungary, Sweden and the United Kingdom |     |                           |                          | at least 10% of workforce in last 2 years, and workers who had not (recruitment varied between countries) (n=641)                                          |                                                                                                                                                                                          |     |     |      |                                                                                                                                                                                                                                      |   |      | significantly associated with depression symptoms                                                                                                                                   |          |     |
| Brickman 1978  | Lottery Winners and Accident Victims: Is Happiness Relative?                           | USA | Not reported: likely 1977 | Basic cross-sectional    | "Major" winners of Illinois State Lottery and controls: people living in approximately the same areas of the city as the winners (n=152)                   | Being a major winner on the Illinois lottery ( <b>increase</b> ). Among 22 people interviewed, 7 won \$1 million, 6 won \$400,000, 2 won \$300,000, 4 won \$100,000, and 3 won \$50,000. | No  | No  | 0    | Happiness, 6 point scale                                                                                                                                                                                                             | 1 | Har. | No significant effect of lottery wins on happiness                                                                                                                                  | Critical | No  |
| Brock 1985     | From wife to widow: Role transition in the elderly                                     | USA | Not reported: likely 1981 | Basic cross-sectional    | Widows whose husbands had died 11-13 months prior to data collection, registered at 20 funeral homes in large metropolitan city in southwestern USA (n=92) | If income <b>decreased</b> by \$5,000-\$10,000 per year after widowhood or by \$15,000-\$35,000 per year after widowhood                                                                 | No  | No  | 12.3 | Bradburn Affect Balance Scale                                                                                                                                                                                                        | 2 | Ben. | Income loss after widowhood was associated with poorer scores on the affect balance scale                                                                                           | Critical | No  |
| Burke 1986     | Reemployment on a poorer job after a plant closing                                     | CAN | 1983                      | Basic cross-sectional    | Former employees at the Canadian Admiral plant who became re-employed (n=44)                                                                               | Drop in salary between previous job with Admiral and new job ( <b>decrease</b> )                                                                                                         | No  | No  | 16   | 1. Specific life satisfaction: asked about present life, 10 bipolar item domains combined into single index, 2. Global life satisfaction: two items combined to form an index measure, one on happiness and one on life satisfaction | 2 | Ben. | After closure of Admiral plant in Canada, re-employment in a job with smaller hourly salary was correlated with reduced specific life satisfaction but not global life satisfaction | Critical | No  |
| Burmester 2015 | Impact of a private sector living wage intervention on depressive                      | DOM | 2011                      | Other natural experiment | Low-paid, hourly wage workers at the intervention factory and workers at a                                                                                 | Being employed at a factory which operated a living wage on opening in April 2010, which 'early hire'                                                                                    | Yes | Yes | 16   | CES-D 20                                                                                                                                                                                                                             | 3 | Ben. | Working in a factory with a living wage intervention was associated with better CES-D scores                                                                                        | Serious  | Yes |

|             |                                                                                                                                               |     |           |                        |                                                                                                                                                                                               |                                                                                                                                                                                                                                                                                                                   |    |     |    |                                                                                                                                                                                                        |   |      |                                                                                                                                                                             |          |     |
|-------------|-----------------------------------------------------------------------------------------------------------------------------------------------|-----|-----------|------------------------|-----------------------------------------------------------------------------------------------------------------------------------------------------------------------------------------------|-------------------------------------------------------------------------------------------------------------------------------------------------------------------------------------------------------------------------------------------------------------------------------------------------------------------|----|-----|----|--------------------------------------------------------------------------------------------------------------------------------------------------------------------------------------------------------|---|------|-----------------------------------------------------------------------------------------------------------------------------------------------------------------------------|----------|-----|
|             | symptoms among apparel workers in the Dominican Republic: a quasi-experimental study                                                          |     |           |                        | comparison factory in similar geographical area (n=204)                                                                                                                                       | employees did not know in advance of being getting the job. Included other workplace improvements such as right to organise, higher labour standards, work hour restrictions etc. <b>(increase)</b>                                                                                                               |    |     |    |                                                                                                                                                                                                        |   |      |                                                                                                                                                                             |          |     |
| Buttke 2012 | Community Assessment for Public Health Emergency Response (CASPER) one year following the Gulf Coast oil spill: Alabama and Mississippi, 2011 | USA | 2011      | Repeat cross-sectional | Adult population of Gulf Coast counties of Alabama and Mississippi (n=596)                                                                                                                    | If the oil spill resulted in an income <b>decrease</b>                                                                                                                                                                                                                                                            | No | No  | 18 | 1. Experiencing 14 or more mentally unhealthy days in last 30 (CDC Healthy Days measure), 2. Patient Health Questionnaire-2 (PHQ-2) for depressive symptoms, 3. Generalized Anxiety Disorder-2 (GAD-2) | 9 | Ben. | In areas affected by a Gulf Coast oil spill, people whose incomes decreased as a result scored more poorly on three mental health measures than others                      | Critical | Yes |
| Cai 2016    | Permanent income and subjective well-being                                                                                                    | CHN | 2006-2009 | Basic longitudinal     | Adults aged 18-60 in rural households in 64 Chinese villages across four countries (n=960)                                                                                                    | Within-person <b>changes</b> in household income per capita                                                                                                                                                                                                                                                       | No | No  | 36 | Life satisfaction, 5 point scale                                                                                                                                                                       | 1 | Ben. | There was no significant effect of income changes on life satisfaction                                                                                                      | Serious  | Yes |
| Casey 2004  | Maternal Depression, Changing Public Assistance, Food Security, and Child Health Status                                                       | USA | 2000-2001 | Basic cross-sectional  | Primary adult caregivers accompanying children 0-3 years presenting at hospital EDs and primary care clinics in Baltimore, Maryland, Boston, Minneapolis, Minnesota and Washington DC (n=845) | Changes in welfare payments during the 12 months preceding the interview: 1) sanctioned: terminated or reduced by full family or partial sanctions for failure to comply with behavioral requirements; 2) <b>decreased</b> : benefits decreased administratively due to increased income or decreased expense (eg | No | Yes | 12 | 3-item maternal depression screen developed by Kemper et al used to screen for maternal depression                                                                                                     | 2 | Ben. | Reduction in benefits due to change in circumstances was associated with worsened mental health. The effect of a reduction due to sanctions was smaller and non-significant | Critical | Yes |



|               |                                                                                                                  |     |           |                          |                                                                                                                                                                                                                                                                                         |                                                                                                                                          |    |    |     |                                                                                                               |   |      |                                                                                                                                                    |          |     |
|---------------|------------------------------------------------------------------------------------------------------------------|-----|-----------|--------------------------|-----------------------------------------------------------------------------------------------------------------------------------------------------------------------------------------------------------------------------------------------------------------------------------------|------------------------------------------------------------------------------------------------------------------------------------------|----|----|-----|---------------------------------------------------------------------------------------------------------------|---|------|----------------------------------------------------------------------------------------------------------------------------------------------------|----------|-----|
|               |                                                                                                                  |     |           |                          |                                                                                                                                                                                                                                                                                         | from employment or changes in marital status)                                                                                            |    |    |     |                                                                                                               |   |      |                                                                                                                                                    |          |     |
| Cesarini 2016 | Wealth, Health, And Child Development: Evidence From Administrative Data On Swedish Lottery Players              | SWE | 1986-2010 | Other natural experiment | 1. Swedes who held prize-linked savings accounts from 1986 to 2003 and won pre-2006; 2. Subscribers to the Kombi monthly ticket lottery from 1998 to 2010; 3. Participants in the Triss scratch ticket lottery run by Swedish Govt owned gambling operator from 1994 to 2010 (n=57,988) | Uses the amount won in the 3 lotteries as the exposure. Amounts varied between lotteries, from 1,000 to 2 million SEK. <b>(increase)</b> | No | No | 288 | The sum of the defined daily doses of mental health related drugs prescribed to someone between 2006 and 2010 | 1 | Ben. | A lottery win was associated with a small reduction in the consumption of mental health drugs                                                      | Low      | No  |
| Cheung 2015   | When Does Money Matter Most? Examining the Association between Income and Life Satisfaction over the Life Course | CHE | 1999-2007 | Basic longitudinal       | Swiss population aged 14+ (n=13,405)                                                                                                                                                                                                                                                    | Within-person <b>changes</b> in household income                                                                                         | No | No | 12  | Life satisfaction, 11 point scale                                                                             | 1 | Ben. | Within person income change was significantly associated with life satisfaction in Swiss population                                                | Moderate | Yes |
| Chien 2004    | Quality of life and related risk factors in a Taiwanese Village population 21 months after an earthquake         | TWN | 2001      | Basic cross-sectional    | Residents of Tong-Chi village aged 16 or older (n=461)                                                                                                                                                                                                                                  | Experiencing prominent financial loss immediately after the earthquake in September 1999 <b>(decrease)</b>                               | No | No | 21  | SF-36 mental health subscale                                                                                  | 1 | Ben. | Those experiencing prominent financial loss after an earthquake in Taiwan had poorer mental health on SF-36 mental health subscale                 | Critical | Yes |
| Chin 2018     | Quality of life at 6 years after occupational injury                                                             | TWN | 2009-2015 | Basic longitudinal       | Taiwanese workers hospitalised for 3 or more days due to occupational injury between 1st Feb and 31st                                                                                                                                                                                   | If current monthly salary (6 years post-accident) is <100% of that before the occupational injury <b>(decrease)</b>                      | No | No | 72  | Psychological domain of the Taiwanese version of WHOQOL-BREF                                                  | 1 | Ben. | There was a statistically significant worsening of the psychological domain of QoL if the salary received 6 years after an occupational injury was | Serious  | Yes |

|                    |                                                                                                   |     |           |                          |                                                                                                              |                                                                                                                                                                                                                                                                          |     |     |    |                                                                                                     |   |      |                                                                                                                                                                                                                                                                |          |     |
|--------------------|---------------------------------------------------------------------------------------------------|-----|-----------|--------------------------|--------------------------------------------------------------------------------------------------------------|--------------------------------------------------------------------------------------------------------------------------------------------------------------------------------------------------------------------------------------------------------------------------|-----|-----|----|-----------------------------------------------------------------------------------------------------|---|------|----------------------------------------------------------------------------------------------------------------------------------------------------------------------------------------------------------------------------------------------------------------|----------|-----|
|                    |                                                                                                   |     |           |                          | August 2009 (n=563)                                                                                          |                                                                                                                                                                                                                                                                          |     |     |    |                                                                                                     |   |      | <100% of what it was pre-injury                                                                                                                                                                                                                                |          |     |
| Chrostek 2016      | An Empirical Investigation into the Determinants and Persistence of Happiness and Life Evaluation | POL | 2003-2011 | Basic longitudinal       | Polish population (n=3,706)                                                                                  | Within-person <b>changes</b> in household income                                                                                                                                                                                                                         | No  | No  | 12 | 1. Happiness - 4 point scale, 2. Life satisfaction/evaluation - 7 point scale                       | 2 | Inc. | Changes in household income were associated with happiness but not life satisfaction                                                                                                                                                                           | Serious  | No  |
| Clark 2016         | Adaptation to poverty in long-run panel data                                                      | DEU | 1985-2012 | Basic longitudinal       | German population (n=53,867)                                                                                 | Within-person <b>changes</b> in whether someone is above/below the poverty line, defined as 60% of country-level median equivalent household income. Also, fixed effects of poverty that started within last 0-1 years i.e. recent move into poverty ( <b>decrease</b> ) | Yes | No  | 12 | Life satisfaction, 11 point scale                                                                   | 6 | Ben. | Changes in poverty line status was significantly associated with life satisfaction, and experiencing a recent move below the poverty line was associated with larger effects                                                                                   | Serious  | Yes |
| Clingingsmith 2016 | Negative emotions, income, and welfare: Causal estimates from the PSID                            | USA | 2001-2013 | Basic longitudinal       | US population aged 23+ employed in at least one year of data collection (n=10,156)                           | Within-person <b>changes</b> in total family income                                                                                                                                                                                                                      | No  | No  | 12 | 1. Kessler 6 (K6) index of non-specific psychological distress, 2. Life satisfaction, 5 point scale | 5 | Ben. | Within-person changes in family income was associated with worsening of psychological distress and life satisfaction. Instrumental variable analysis using cross-industry wage variation as an instrument found a larger effect size than self-reported income | Serious  | Yes |
| Coley 2014         | Low-income women's employment experiences and their financial, personal, and family well-being    | USA | 1999-2006 | Basic longitudinal       | Low-income mothers in moderate- and high-poverty neighbourhoods in Boston, Chicago and San Antonio (n=1,586) | Within-person <b>changes</b> in weekly wages                                                                                                                                                                                                                             | No  | No  | 54 | Brief Symptom Inventory (BSI), 18 item version                                                      | 1 | Ben. | No significant. effect of within-person changes in weekly wages on depression for low income mothers                                                                                                                                                           | Serious  | No  |
| Costello 2010      | Association of Family Income Supplements in                                                       | USA | 1993-2006 | Other natural experiment | Children aged 9, 11 and 13 in 1993 living in 11                                                              | Receiving an income supplement as a member of the Eastern                                                                                                                                                                                                                | No  | Yes | 36 | Child and Adolescent Psychiatric Assessment (CAPA) -                                                | 5 | Ben. | The likelihood of having any psychiatric disorder reduced in Native                                                                                                                                                                                            | Moderate | Yes |

|              |                                                                                                                          |     |           |                                  |                                                                                                                                      |                                                                                                                                                                                                                                                                                      |     |     |    |                                                                                                                                                                                                               |   |      |                                                                                                                                                                                                               |               |     |
|--------------|--------------------------------------------------------------------------------------------------------------------------|-----|-----------|----------------------------------|--------------------------------------------------------------------------------------------------------------------------------------|--------------------------------------------------------------------------------------------------------------------------------------------------------------------------------------------------------------------------------------------------------------------------------------|-----|-----|----|---------------------------------------------------------------------------------------------------------------------------------------------------------------------------------------------------------------|---|------|---------------------------------------------------------------------------------------------------------------------------------------------------------------------------------------------------------------|---------------|-----|
|              | Adolescence With Development of Psychiatric and Substance Use Disorders in Adulthood Among an American Indian Population |     |           |                                  | counties in North Carolina (n=1,185)                                                                                                 | Band of Cherokees when a casino was opened on their reservation in 1996. Every tribal member receives a % of the profits, paid every 6 months <b>(increase)</b>                                                                                                                      |     |     |    | Presence of any DSM-IV psychiatric disorder, any behavioral disorder (conduct, oppositional, or antisocial personality disorder), any emotional disorder (depressive or anxiety disorders) in early adulthood |   |      | American 18 year olds who received cash transfers from casino proceeds. The reduction was largely attributable to changes in substance use related disorders. Larger transfers resulted in greater reductions |               |     |
| Courtin 2018 | Conditional Cash Transfers And Health Of Low-Income Families In The US: Evaluating The Family Rewards Experiment         | USA | 2007-2009 | Randomised trial of intervention | Low income families with children living in six community districts in the Bronx, Brooklyn and Manhattan in 2007 (n=2,043)           | Average conditional cash transfer amount was \$8,674 over 3 years of the programme, approx. 22% increase in average monthly income. Cash rewards were offered for 22 activities in three core areas: Education incentives, health incentives, workforce incentives <b>(increase)</b> | Yes | Yes | 18 | 1. Subjectively experiencing serious psychological distress in past month, 2. Kessler Psychological Distress scale (K10)                                                                                      | 2 | Ben. | There was no significant effect of the conditional cash transfer on two measures of distress at 18 months                                                                                                     | Some concerns | Yes |
| Daley 2017   | Income and the mental health of Canadian mothers: Evidence from the Universal Child Care Benefit                         | CAN | 2003-2008 | Before and after (controlled)    | Mothers aged 18-59 with children aged <11 in all Canadian provinces except those on Crown land and First Nations reserves (n=26,886) | Exposure to the Universal Child Care Benefit, introduced in 2006, which paid \$100/month (\$1200 annually) for each child <6 years <b>(increase)</b>                                                                                                                                 | No  | No  | 0  | 1. Self-assessed mental health, 5 point scale, 2. Stress on a daily basis, 5 point scale, 3. Life satisfaction, 5 point scale                                                                                 | 3 | Inc. | Introduction of a universal child benefit of modest amount (\$100/month) had a significant effect on life satisfaction but not on self-assessed mental health or stress                                       | Moderate      | No  |
| Dang 2019    | Did the Poor Adapt to Their Circumstances? Evidence from Long-run Russian Panel Data                                     | RUS | 2001-2017 | Basic longitudinal               | Russian population (n=38,696)                                                                                                        | Within-person <b>changes</b> in whether someone is above/below the poverty line, defined as 60% of median per capita income. Also, fixed effects of poverty that started within last                                                                                                 | Yes | No  | 12 | Life satisfaction, 5 point scale                                                                                                                                                                              | 4 | Ben. | Changes in poverty line status were significantly associated with life satisfaction, slightly more for women than men. A recent move into poverty was associated with a larger effect.                        | Serious       | Yes |

|              |                                                                                                                  |     |           |                                  |                                                                                                                                                                                                                 |                                                                                                                                                                                                |     |     |     |                                                                                                                                                    |    |      |                                                                                                                                                                                                                                          |               |     |
|--------------|------------------------------------------------------------------------------------------------------------------|-----|-----------|----------------------------------|-----------------------------------------------------------------------------------------------------------------------------------------------------------------------------------------------------------------|------------------------------------------------------------------------------------------------------------------------------------------------------------------------------------------------|-----|-----|-----|----------------------------------------------------------------------------------------------------------------------------------------------------|----|------|------------------------------------------------------------------------------------------------------------------------------------------------------------------------------------------------------------------------------------------|---------------|-----|
|              |                                                                                                                  |     |           |                                  |                                                                                                                                                                                                                 | 0-1 years i.e. recent move into poverty <b>(decrease)</b>                                                                                                                                      |     |     |     |                                                                                                                                                    |    |      |                                                                                                                                                                                                                                          |               |     |
| Dearing 2004 | Implications of family income dynamics for women's depressive symptoms during the first 3 years after childbirth | USA | 1991-1994 | Basic longitudinal               | Women 18+ living in or near 10 urban and suburban sites in US who gave birth to full-term, healthy newborns from January to November 1991 (n=1,351)                                                             | Within-person <b>changes</b> in family income. Also, within-person changes in poverty status (calculated by dividing total family income by poverty threshold for the appropriate family size) | Yes | No  | 12  | CES-D 20                                                                                                                                           | 3  | Ben. | Income changes and moves across the poverty line in the 3 years after childbirth were significantly associated with odds of depression                                                                                                   | Serious       | Yes |
| Diener 1993  | The Relationship Between Income And Subjective Well-Being - Relative Or Absolute                                 | USA | 1971-1984 | Basic longitudinal               | US population in 1971 (n=4,942)                                                                                                                                                                                 | <b>Decrease OR increase</b> in income of >0.5 SDs compared with baseline                                                                                                                       | No  | No  | 120 | General Well-Being Schedule                                                                                                                        | 4  | Har. | There was no significant difference in wellbeing scores crossing income change groups (over 10 years) and whether someone is low, medium or high income earner                                                                           | Critical      | No  |
| Dolan 2013   | Moving Up and Sliding Down: An Empirical Assessment of the Effect of Social Mobility on Subjective Wellbeing     | GBR | 1980-2004 | Basic longitudinal               | Children born between 5th and 11th April in 1970 in England, Scotland, Wales and Northern Ireland, and children born on those days outside the country identified from school registers at later ages (n=5,383) | Difference between household income at age 30 or 34 and household income at age 10, classed as either upwardly mobile <b>(increase)</b> or downwardly mobile <b>(decrease)</b>                 | No  | No  | 288 | 1. Life satisfaction, 11 point scale, 2. Rutter Malaise Inventory, 3. GHQ, 4. Kessler stress scale, but only 4 questions rather than usual 6 or 10 | 12 | Ben. | Upward income trajectories from age 10 to 30/34 were not significantly associated with life satisfaction, distress, common mental disorder or stress, but downward income trajectories were significantly associated across all measures | Serious       | No  |
| Dorsett 2014 | Human Well-Being and In-Work Benefits: A Randomized Controlled Trial                                             | GBR | 2003-2010 | Randomised trial of intervention | Out of work single mothers on Income Support OR single mothers working part-time in low-paid jobs that qualified them for Working Tax Credit (living                                                            | Employment and Retention Advancement (ERA). Included (1) post-employment job coaching (2) cash incentives for staying and advancing in work and (3) training opportunities, including          | No  | Yes | 33  | Life satisfaction, 5 point scale                                                                                                                   | 2  | Inc. | Enhanced in-work income support which included cash incentives was successful in improving earnings but resulted in no significant improvement in life satisfaction at Year 2 and a worsening of life satisfaction at Year 5             | Some concerns | Yes |

|                    |                                                                                                                                         |     |                      |                               |                                                                                                                                                                                                                                             |                                                                                                                                                                                                                         |    |    |    |                                                                                                             |   |      |                                                                                                                                                    |          |     |
|--------------------|-----------------------------------------------------------------------------------------------------------------------------------------|-----|----------------------|-------------------------------|---------------------------------------------------------------------------------------------------------------------------------------------------------------------------------------------------------------------------------------------|-------------------------------------------------------------------------------------------------------------------------------------------------------------------------------------------------------------------------|----|----|----|-------------------------------------------------------------------------------------------------------------|---|------|----------------------------------------------------------------------------------------------------------------------------------------------------|----------|-----|
|                    |                                                                                                                                         |     |                      |                               | outside of London) (n=2,841)                                                                                                                                                                                                                | help with tuition costs and cash rewards for completing training courses while employed ( <b>increase</b> )                                                                                                             |    |    |    |                                                                                                             |   |      |                                                                                                                                                    |          |     |
| Elwell-Sutton 2019 | Socioeconomic position and depression in South African adults with long-term health conditions: a longitudinal study of causal pathways | ZAF | 2011-2012            | Basic longitudinal            | Adults aged 18+ with hypertension, diabetes, chronic respiratory disease or depression who attended 38 primary care clinics in the Western Cape of South Africa (n=3,904)                                                                   | Income <b>change</b> between baseline and follow-up                                                                                                                                                                     | No | No | 14 | CES-D 10                                                                                                    | 1 | Ben. | Change in income was associated with reduction (improvement) in CES-D score in South Africans with chronic illnesses                               | Serious  | No  |
| Erixson 2017       | Health responses to a wealth shock: evidence from a Swedish tax reform                                                                  | SWE | 2003-2005            | Before and after (controlled) | Heirs and beneficiaries of all deceased Swedes over the period 2003 to 2005 (n=79,801)                                                                                                                                                      | Abolition of inheritance tax in December 2004, which resulted in larger than expected inheritances. Classed as affected by reform if inheritance exceeds what had previously been the tax threshold ( <b>increase</b> ) | No | No | 0  | If hospitalised in given year for conditions categorised in ICD chapter on mental and behavioural disorders | 2 | Ben. | An inheritance shock related to tax abolition in Sweden was not significantly associated with hospitalisations for mental or behavioural disorders | Low      | Yes |
| Evans 2005         | Adaptation, response-shift and quality of life ratings in mentally well and unwell groups                                               | GBR | 1994-1996, 1999-2001 | Basic longitudinal            | 1. Patients aged 18-65 with diagnosed psychotic illness of at least 2 years duration at 3 London hospital sites and 1 Manchester site; 2. Adults aged 18-65 living in community residences in a deprived area of South Manchester (n=1,075) | Experiencing an <b>increase or decrease</b> in monthly income from earnings and/or benefits from baseline to follow-up                                                                                                  | No | No | 24 | Subjective 'general' quality of life measured by Andrews and Withey's seven-point delighted-terrible scale  | 2 | Ben. | An income increase was significantly associated with improved life satisfaction, but income decreases were not                                     | Critical | Yes |

|            |                                                                                                                                              |     |           |                               |                                                                                                                  |                                                                                                                                                                                                                                                                  |     |    |    |                                                                                                  |   |      |                                                                                                                                                                                                                                         |          |     |
|------------|----------------------------------------------------------------------------------------------------------------------------------------------|-----|-----------|-------------------------------|------------------------------------------------------------------------------------------------------------------|------------------------------------------------------------------------------------------------------------------------------------------------------------------------------------------------------------------------------------------------------------------|-----|----|----|--------------------------------------------------------------------------------------------------|---|------|-----------------------------------------------------------------------------------------------------------------------------------------------------------------------------------------------------------------------------------------|----------|-----|
| Evans 2011 | Giving Mom a Break: The Impact of Higher EITC Payments on Maternal Health                                                                    | USA | 1993-2001 | Before and after (controlled) | Women aged 21-40 with children eligible to receive Earned Income Tax Credit (n=82,907)                           | 1993 Earned Income Tax Credit (EITC) expansion - first meaningful separation of benefit levels for families based on number of children, and families of two or more children received substantially more in payments ( <b>increase</b> )                        | No  | No | 0  | 1. Any bad mental health days in past 30 days, 2. Number of bad mental health days in past month | 2 | Ben. | Expansion of earned income tax credit which included additional monies for larger families for first time was significantly associated with reduction in number of bad mental health days, but not likelihood of having any bad MH days | Serious  | Yes |
| Fang 2017  | Does everyone exhibit loss aversion? Evidence from a panel quantile regression analysis of subjective well-being in Japan                    | JPN | 2009-2013 | Basic longitudinal            | Japanese population aged 20-69 (n=3,695)                                                                         | Within-person changes in household income. Also: percentage change in income compared with previous year, included all on one scale and as two separate variables, one for positive changes ( <b>increase</b> ) and one for negative changes ( <b>decrease</b> ) | No  | No | 12 | Happiness, 11 point scale                                                                        | 9 | Ben. | Income change in Japanese adults was associated with a significant difference in happiness in the following year. When split into increases and decreases, only decreases were significant                                              | Serious  | Yes |
| Feeny 2014 | Are Poor People Less Happy? Findings from Melanesia                                                                                          | SLB | 2012-2013 | Basic cross-sectional         | Population of Solomon Islands and Vanuatu (n=619)                                                                | If the total amount of money that comes into the house has gone up ( <b>increase</b> ) or down ( <b>decrease</b> ) in the past 2 years, measured on 5 point Likert scale                                                                                         | No  | No | 24 | Happiness, 10 point scale                                                                        | 1 | Ben. | There was a significant effect of how income has changed compared with two years ago on happiness                                                                                                                                       | Critical | No  |
| Fenn 2015  | The role of unconditional cash transfers during a nutritional emergency in Maradi region, Niger: a pre-post intervention observational study | NER | 2012      | Before and after (no control) | Households with a non-acutely malnourished child aged 6-36 months in the Aguié district of Maradi, Niger (n=412) | Receiving a cash transfer from Save the Children - amount estimated to meet 80% of the energy requirements for an average-sized household, equivalent to about £32/household/month, rising to about £43 in June when food prices increased. Timed to             | Yes | No | 5  | Self-Reporting Questionnaire (SRQ-19)                                                            | 1 | Ben. | Cash transfer offered to families in Niger during rainy season significantly reduced maternal depression                                                                                                                                | Critical | No  |

|               |                                                                                                                                                      |     |           |                                  |                                                                                                                                                     |                                                                                                                                                                                                                                |     |     |    |                                                                         |   |      |                                                                                                                                                                                                              |               |     |
|---------------|------------------------------------------------------------------------------------------------------------------------------------------------------|-----|-----------|----------------------------------|-----------------------------------------------------------------------------------------------------------------------------------------------------|--------------------------------------------------------------------------------------------------------------------------------------------------------------------------------------------------------------------------------|-----|-----|----|-------------------------------------------------------------------------|---|------|--------------------------------------------------------------------------------------------------------------------------------------------------------------------------------------------------------------|---------------|-----|
|               |                                                                                                                                                      |     |           |                                  |                                                                                                                                                     | cover the lean and rainy seasons when households were unable to farm <b>(increase)</b>                                                                                                                                         |     |     |    |                                                                         |   |      |                                                                                                                                                                                                              |               |     |
| Fernald 2011  | Effect of Ecuador's cash transfer program (Bono de Desarrollo Humano) on child development in infants and toddlers: a randomized effectiveness trial | ECU | 2003-2006 | Randomised trial of intervention | Low-income mothers in bottom two poverty quintiles with children <16 years (n=959)                                                                  | \$15/month cash transfer <b>(increase)</b> . Equated to approx. 6-10% of average HH pre-transfer income. No difference according to number of children.                                                                        | No  | No  | 17 | CES-D 20                                                                | 1 | Har. | There was no significant effect of a small Ecuadorian cash transfer scheme on maternal depression                                                                                                            | Some concerns | Yes |
| Frijters 2011 | Life Satisfaction Dynamics with Quarterly Life Event Data                                                                                            | AUS | 2002-2007 | Longitudinal                     | Australian population aged 16+ (n=13,388)                                                                                                           | Self-defined major worsening/ <b>decrease</b> (e.g., went bankrupt) or improvement/ <b>increase</b> (e.g., won lottery, received an inheritance) in financial situation within last 12 months.                                 | No  | No  | 12 | Life satisfaction, 11 point scale                                       | 2 | Ben. | Both major improvements and major worsenings of income were significantly associated with life satisfaction, but there was also an element of anticipation and adaptation such that these impacts don't last | Serious       | Yes |
| Frijters 2012 | The Optimality of Tax Transfers: What does Life Satisfaction Data Tell Us?                                                                           | AUS | 2001-2007 | Basic longitudinal               | Australian population aged 25+, not students (n=9,518)                                                                                              | Within-person <b>change</b> in household income                                                                                                                                                                                | No  | No  | 12 | Life satisfaction, 11 point scale                                       | 1 | Ben. | There was a significant effect of household income changes on life satisfaction in the Australian population                                                                                                 | Serious       | Yes |
| Galama 2017   | Wealthier, Happier and More Self-Sufficient: When Anti-Poverty Programs Improve Economic and Subjective Wellbeing at a                               | COL | 2010      | Other natural experiment         | Low-income Colombian households with children living in one of the fourteen cities participating in FAU conditional cash transfer programme (n=472) | Being estimated to be eligible for the FAU conditional cash transfer programme. Conditional on young children attending regular medical check-ups and school-age children enrolling and continually attending school. Provided | Yes | Yes | 36 | 1. Life satisfaction, 4 point scale, 2. Happiness (not clearly defined) | 1 | Ben. | Cash transfer was significantly associated with wellbeing, but the size of the effect was very sensitive to the choice of cut-off used in analysis                                                           | Serious       | Yes |

|                    |                                                                                       |     |           |                                  |                                                                                                                                                      |                                                                                                                                                                                                                                                                                                                                                                                                                    |     |     |    |                               |   |      |                                                                                                                                                                                                                         |               |     |  |
|--------------------|---------------------------------------------------------------------------------------|-----|-----------|----------------------------------|------------------------------------------------------------------------------------------------------------------------------------------------------|--------------------------------------------------------------------------------------------------------------------------------------------------------------------------------------------------------------------------------------------------------------------------------------------------------------------------------------------------------------------------------------------------------------------|-----|-----|----|-------------------------------|---|------|-------------------------------------------------------------------------------------------------------------------------------------------------------------------------------------------------------------------------|---------------|-----|--|
|                    | Reduced Cost to Taxpayers                                                             |     |           |                                  |                                                                                                                                                      | nutritional subsidy and educational subsidy <b>(increase)</b>                                                                                                                                                                                                                                                                                                                                                      |     |     |    |                               |   |      |                                                                                                                                                                                                                         |               |     |  |
| Gassman-Pines 2006 | Five-year effects of an anti-poverty program on marriage among never-married mothers  | USA | 1994-1997 | Randomised trial of intervention | Unmarried women aged 18+ with incomes at or below 150% of the federal poverty line living in two poor neighbourhoods in Milwaukee, Wisconsin (n=295) | New Hope Project: included wage supplement <b>(increase)</b> to increase participants' income up to poverty threshold, affordable health insurance, childcare subsidies, and community service jobs for those unable to find private employment. All conditional on working 30 hours/week.                                                                                                                         | Yes | Yes | 24 | CES-D 20                      | 1 | Ben. | There was no significant impact of the New Hope anti-poverty program on depression in never married mothers                                                                                                             | Some concerns | Yes |  |
| Gennetian 2002     | Children and Welfare Reform: A View from an Experimental Welfare Program in Minnesota | USA | 1994-1997 | Randomised trial of intervention | Single mothers of children aged 2-9 years who were long-term welfare recipient families in urban counties of Minnesota (n=587)                       | Minnesota Family Investment Program (MFIP): (1) working families received supplemental benefits <b>(increase)</b> while working until income reached approx. 140% of poverty line (2) child-care expenses were paid directly to provider (3) single parents who received benefits for 2 of past 3 years had to participate in employment and training activities unless working >30hrs/wk or had good cause not to | Yes | Yes | 36 | CES-D 20                      | 2 | Ben. | New more generous benefits were not associated with CES-D score in single mothers who were long-term welfare recipients, except a subset of individuals who only received incentives without obligations/conditionality | High          | Yes |  |
| Grattan 2017       | "Bouncing back" after the Deepwater Horizon oil spill                                 | USA | 2010-2011 | Basic longitudinal               | Adults from Franklin County who experienced an indirect impact or exposure to                                                                        | Experiencing an income loss <b>(decrease)</b> due to the oil spill and indicating that the biggest impact of the                                                                                                                                                                                                                                                                                                   | No  | No  | 12 | Profile of Mood States (POMS) | 1 | Ben. | Experiencing an income loss due to the Deepwater oil spill was significantly associated with poorer mental health                                                                                                       | Critical      | No  |  |



|            |                                                                                                                                                              |     |           |                                  |                                                                                                                                                                                                                |                                                                                                                                                                                                                                                                                                                                                                                                            |     |     |    |                                                                                                                  |   |      |                                                                                                                                                               |         |     |
|------------|--------------------------------------------------------------------------------------------------------------------------------------------------------------|-----|-----------|----------------------------------|----------------------------------------------------------------------------------------------------------------------------------------------------------------------------------------------------------------|------------------------------------------------------------------------------------------------------------------------------------------------------------------------------------------------------------------------------------------------------------------------------------------------------------------------------------------------------------------------------------------------------------|-----|-----|----|------------------------------------------------------------------------------------------------------------------|---|------|---------------------------------------------------------------------------------------------------------------------------------------------------------------|---------|-----|
|            |                                                                                                                                                              |     |           |                                  | Deepwater oil spill (e.g. worked in fishing or tourism industries) AND adults from Baldwin County who lived or worked in a community where spilled oil reached the shoreline i.e. direct impact (n=133)        | oil spill on their life was economic                                                                                                                                                                                                                                                                                                                                                                       |     |     |    |                                                                                                                  |   |      |                                                                                                                                                               |         |     |
| Green 2016 | Does poverty alleviation decrease depression symptoms in post-conflict settings? A cluster-randomized trial of microenterprise assistance in Northern Uganda | UGA | 2009-2011 | Randomised trial of intervention | The poorest and most vulnerable community members living in villages, transit sites and displacement camps in Gulu and Kitgum districts where population >400 OR at least 80 households were present (n=1,732) | Women's Income Generating Support (WINGS) program, three core components: (i) 5 days of business skills training designed for illiterate populations, (ii) an individual start-up grant of roughly US\$150 ( <b>increase</b> ), and (iii) 3 to 5 visits over approximately 18 months by trained community workers who provided business advice and encouragement to use the grant for business development | Yes | Yes | 16 | Modified version of the Acholi Psychosocial Assessment Instrument (APAI) depression subscale                     | 3 | Ben. | There was no effect of a poverty alleviation program on symptoms of depression in vulnerable people (mostly women) in post-conflict setting                   | Low     | Yes |
| Gros 2019  | Household-level effects of providing forecast-based cash in anticipation of extreme weather events: Quasi-experimental evidence from                         | BGD | 2016-2017 | Other natural experiment         | Those living in vulnerable households in flood-risk areas of Bangladesh (n=348)                                                                                                                                | Forecast-based Financing (FbF) project beneficiaries: involved an unconditional cash transfer of BFT 5000 (equivalent of \$60), just below the monthly average value of 2016/17 Minimum Expenditure Basket for                                                                                                                                                                                             | Yes | No  | 1  | 1. Subjective unhappiness, 3 point scale, 2. Subjective depressive mood or anxiety in past 7 days, 3 point scale | 2 | Ben. | Groups offered forecast based cash transfers prior to flooding in Bangladesh more likely to be happy and less likely to be depressed after the flood occurred | Serious | Yes |

|            |                                                                                                                              |     |           |                                      |                                                                                                                                                              |                                                                                                                                                                                                                                       |    |     |    |                                   |   |      |                                                                                                                                                                                                       |          |     |
|------------|------------------------------------------------------------------------------------------------------------------------------|-----|-----------|--------------------------------------|--------------------------------------------------------------------------------------------------------------------------------------------------------------|---------------------------------------------------------------------------------------------------------------------------------------------------------------------------------------------------------------------------------------|----|-----|----|-----------------------------------|---|------|-------------------------------------------------------------------------------------------------------------------------------------------------------------------------------------------------------|----------|-----|
|            | humanitarian interventions in the 2017 floods in Bangladesh                                                                  |     |           |                                      |                                                                                                                                                              | Northwest Bangladesh (BDT 5400). Triggered in the event of a forecast of an extreme weather event - in this study, it was triggered in advance of 2017 floods, varying from 3-7 days in advance of the flood peak ( <b>increase</b> ) |    |     |    |                                   |   |      |                                                                                                                                                                                                       |          |     |
| Gulal 2019 | The Impact of Minimum Wages on Well-Being: Evidence from a Quasi-experiment in Germany                                       | DEU | 2012-2016 | Before and after (controlled)        | German population aged 18-65 employed in 2014 or 2015 (n=2,944)                                                                                              | Introduction of a minimum wage of 8.5 euro/hr on Jan 1st 2015 in Germany - prior to this no minimum wage existed ( <b>increase</b> )                                                                                                  | No | No  | 12 | Life satisfaction, 11 point scale | 1 | Ben. | Introduction of a minimum wage in Germany was associated with increased life satisfaction, and effects were larger in East Germany (which was overall more deprived)                                  | Serious  | Yes |
| Handa 2014 | Livelihood Empowerment against Poverty Program Impact Evaluation                                                             | GHA | 2010-2012 | Non-randomised trial of intervention | Families living in poverty in Ghana with a vulnerable household member (orphaned/vulnerable child, elderly poor, unable to work due to disability) (n=1,518) | LEAP program: included both a cash transfer element ( <b>increase</b> ) and enrollment into a National Health Insurance scheme. Median transfer level per HH was GHc 15, only 7% of upper poverty line and 11% of lower poverty line  | No | Yes | 24 | Happiness, binary                 | 3 | Ben. | A small cash transfer in Ghana accompanied by a national health insurance scheme was effective overall at increasing happiness, but this was driven by a significant effect for women rather than men | Serious  | Yes |
| Hanly 2015 | Examining the role of subjective and objective burden in carer health-related quality of life: the case of colorectal cancer | IRL | 2010      | Basic cross-sectional                | Informal carers of survivors of colorectal cancer in Ireland (n=136)                                                                                         | Experiencing an income <b>decrease</b> since commencing caregiving                                                                                                                                                                    | No | No  | 36 | SF-12 MCS                         | 1 | Ben. | Income loss after beginning caring for a person with colon cancer was associated with poorer mental health                                                                                            | Critical | No  |
| Hasan 2016 | Does Happiness Adapt to Increase in Income? Evidence from Pakistan Socio-                                                    | PAK | 1998-2001 | Basic longitudinal                   | Pakistan population (n=6,749)                                                                                                                                | Within-person <b>changes</b> in nominal and real income                                                                                                                                                                               | No | No  | 36 | Happiness, 3 point scale          | 2 | Ben. | Household income changes were significantly associated with happiness                                                                                                                                 | Serious  | No  |

|                |                                                                                                     |     |                                  |                                  |                                                                                                                                                                                                    |                                                                                                                                                                                                                                                                                                                                                                                                                                                                                            |     |    |    |                                                                                                                            |   |      |                                                                                                                                                                                                                                                                 |               |     |  |
|----------------|-----------------------------------------------------------------------------------------------------|-----|----------------------------------|----------------------------------|----------------------------------------------------------------------------------------------------------------------------------------------------------------------------------------------------|--------------------------------------------------------------------------------------------------------------------------------------------------------------------------------------------------------------------------------------------------------------------------------------------------------------------------------------------------------------------------------------------------------------------------------------------------------------------------------------------|-----|----|----|----------------------------------------------------------------------------------------------------------------------------|---|------|-----------------------------------------------------------------------------------------------------------------------------------------------------------------------------------------------------------------------------------------------------------------|---------------|-----|--|
|                | economic Survey (1998-2001)                                                                         |     |                                  |                                  |                                                                                                                                                                                                    |                                                                                                                                                                                                                                                                                                                                                                                                                                                                                            |     |    |    |                                                                                                                            |   |      |                                                                                                                                                                                                                                                                 |               |     |  |
| Haushofer 2016 | The Short-term Impact of Unconditional Cash Transfers to the Poor: Experimental Evidence from Kenya | KEN | 2011-2012                        | Randomised trial of intervention | Individuals living in poverty in the poorest areas of Rarieda, Kenya (n=1,474)                                                                                                                     | Unconditional cash transfer of KES 25,200 (\$404) ( <b>increase</b> ). Three treatment arms: 1. Transfer given to male vs female as head of household; 2. Transfer given as lump-sum or sequence of 9 monthly payments of KES 2,800 (\$45); 3. Standard vs larger transfer of additional KES 70,000 (\$1,121 PPP), paid in seven monthly installments of KES 10,000 (\$160 PPP) each. The total transfer amount received by these households was KES 95,200 (\$1,525 PPP, \$1,000 nominal) | Yes | No | 9  | 1. CES-D 20, 2. PSS, standardised total from 4 elements, 3. Happiness, 4 point scale, 4. Life satisfaction, 10 point scale | 8 | Ben. | An unconditional cash transfer in Kenya was associated with improvements to all outcomes including depression, stress, happiness and life satisfaction. There was less clear evidence that a very large top-up to transfer may be better than a basic transfer. | Some concerns | Yes |  |
| Hilton 2006    | Loss and Depression in Cohabiting and Noncohabiting Custodial Single Parents                        | USA | 1992                             | Basic cross-sectional            | Divorced or separated single parent in USA (n=728)                                                                                                                                                 | Experiencing a <b>change</b> in finances compared with prior to marital separation, rated on 5-point Likert scale.                                                                                                                                                                                                                                                                                                                                                                         | No  | No | 24 | Modified version of CES-D                                                                                                  | 2 | Ben. | Having a lower income than pre-divorce was correlated with depression for single parents                                                                                                                                                                        | Critical      | No  |  |
| Hjelm 2017     | Poverty and perceived stress: Evidence from two unconditional cash transfer programs in Zambia      | ZMB | 2010-2013 (CGP), 2011-2014 (MCP) | Randomised trial of intervention | CGP: Women from 90 communities in Kaputa, Kalabo and Shang'ombo with children <5 years; MCP: Women in 92 communities in Luwingu and Serenje identified as most vulnerable in the society (n=4,763) | Zambia Child Grant Program (CGP) and Zambia Multiple Category Cash Transfer Program (MCP): both unconditional, government run unconditional cash transfer programs ( <b>increase</b> ), treatment households received amount equivalent to 11 US\$/month,                                                                                                                                                                                                                                  | Yes | No | 36 | PSS                                                                                                                        | 2 | Inc. | Two unconditional cash transfer programmes in Zambia were not significantly associated with improvement in perceived stress for female caregivers of children                                                                                                   | Some concerns | Yes |  |

|               |                                                                                                                                              |     |           |                                      |                                                                                                                              |                                                                                                                                                                                                                                                      |     |     |    |                                                                                                                                |   |      |                                                                                                                                                             |          |     |
|---------------|----------------------------------------------------------------------------------------------------------------------------------------------|-----|-----------|--------------------------------------|------------------------------------------------------------------------------------------------------------------------------|------------------------------------------------------------------------------------------------------------------------------------------------------------------------------------------------------------------------------------------------------|-----|-----|----|--------------------------------------------------------------------------------------------------------------------------------|---|------|-------------------------------------------------------------------------------------------------------------------------------------------------------------|----------|-----|
|               |                                                                                                                                              |     |           |                                      |                                                                                                                              | estimated to be sufficient to cover cost of one meal per person per day in an average sized household                                                                                                                                                |     |     |    |                                                                                                                                |   |      |                                                                                                                                                             |          |     |
| Horn 2017     | Do Minimum Wage Increases Influence Worker Health?                                                                                           | USA | 1993-2014 | Before and after (controlled)        | US workers aged 18-54 with no college degree (n=1,361,382)                                                                   | Fixed effects of area-level minimum wage, with one-year lag (changes)                                                                                                                                                                                | No  | No  | 0  | # of bad mental health days in past month                                                                                      | 2 | Inc. | State-level minimum wage changes were not significantly associated with # of bad mental health days                                                         | Serious  | Yes |
| Huang 2015    | Associations between economic loss, financial strain and the psychological status of Wenchuan earthquake survivors                           | CHN | 2012      | Basic cross-sectional                | Adults aged 18+ living in five communities near the epicentre of the Wenchuan earthquake (n=306)                             | Impact of the earthquake on income, rated on 5-point Likert scale (decrease)                                                                                                                                                                         | No  | No  | 48 | 1. Diener's 5-item Satisfaction with Life Scale, 2. CES-D 10                                                                   | 4 | Ben. | Income loss following an earthquake in China was significantly associated with depression but not life satisfaction                                         | Critical | No  |
| Ishiguro 2019 | Gender-Based Risk and Protective Factors for Psychological Distress in the Midterm Recovery Period Following the Great East Japan Earthquake | JPN | 2012      | Basic cross-sectional                | Adults 19-65 who had remained living in their home despite earthquake damage in Ishinomaki City; students excluded (n=1,527) | If experienced changes in family income as a result of the earthquake (decrease)                                                                                                                                                                     | No  | No  | 21 | K6                                                                                                                             | 2 | Ben. | Change in income due to earthquake was associated with increased odds of psychological distress 14-21 months later, with a larger effect for women than men | Critical | Yes |
| Jalal 2015    | Food Insecurity Mediates the Effect of a Poverty-Alleviation Program on Psychosocial Health among the Ultra-Poor in Bangladesh               | BGD | 2002-2006 | Non-randomised trial of intervention | Women in ultra-poor households in Rangpur, Nilphamari and Kurigram who were eligible to earn income (n=209)                  | CFPR-TUP: consisted of a subsistence allowance (Tk 10/day [equiv of \$0.17] for 12-15 months), transfer of income-earning assets (ranged in value from equiv of \$50-\$150), training on basic entrepreneurial skills, and health support (increase) | Yes | Yes | 15 | 1. Positive and Negative Affect Schedule, 2. World Health Organisation Self-Reporting Questionnaire for psychological distress | 2 | Ben. | A poverty alleviation program for the ultra poor (which included business skills) had an impact on distress and wellbeing                                   | Serious  | No  |

|              |                                                                                                                                            |     |           |                       |                                                                                                                  |                                                                      |    |    |       |                                                                                                                                                                                                                                                       |   |      |                                                                                                                       |          |     |
|--------------|--------------------------------------------------------------------------------------------------------------------------------------------|-----|-----------|-----------------------|------------------------------------------------------------------------------------------------------------------|----------------------------------------------------------------------|----|----|-------|-------------------------------------------------------------------------------------------------------------------------------------------------------------------------------------------------------------------------------------------------------|---|------|-----------------------------------------------------------------------------------------------------------------------|----------|-----|
| Junna 2019   | The Association Between Income and Psychotropic Drug Purchases: Individual Fixed Effects Analysis of Annual Longitudinal Data in 2003-2013 | FIN | 2003-2013 | Basic longitudinal    | Finnish residents aged 30-62 with taxable personal income (n=337,456)                                            | Within-person <b>change</b> in individual income                     | No | No | 12    | If purchased psychotropic medication within a year (medications for mood, anxiety and other mental disorders). Included antipsychotics, anxiolytics, hypnotics and sedatives, and antidepressants. Excluded anti-dementia drugs and psychostimulants. | 2 | Har. | There was no significant effect of individual income changes on mental health prescriptions in the Finnish population | Moderate | Yes |
| Kendall 2019 | The association between income, wealth, economic security perception, and health: a longitudinal Australian study                          | AUS | 2002-2010 | Basic longitudinal    | Australian population 15+ (n=16,682)                                                                             | Within-person <b>change</b> in disposable household income           | No | No | 48    | SF-36 mental health subscale                                                                                                                                                                                                                          | 1 | Ben. | Income changes were significantly associated with SF-36 mental health scores                                          | Serious  | No  |
| Kiernan 2018 | The Great Recession and Mental Health: the Effect of Income Loss on the Psychological Health of Young Mothers                              | IRL | 2008-2013 | Basic longitudinal    | Female caregivers in Ireland with children aged 9 months at baseline (n=6,821)                                   | Within-person <b>change</b> in household income                      | No | No | 24    | 1. CES-D 8, 2. Self-reported treatment for depression or anxiety                                                                                                                                                                                      | 3 | Ben. | Income changes in mothers of infants in Ireland were significantly associated with changes in depression              | Serious  | Yes |
| Kikuchi 2013 | Structural equation modeling of factors contributing to quality of life in Japanese patients with multiple sclerosis                       | JPN | 2007      | Basic cross-sectional | Japanese inpatients and outpatients diagnosed with multiple sclerosis (MS) at eight University hospitals (n=163) | If income <b>increased</b> OR <b>decreased</b> following onset of MS | No | No | 124.8 | Nottingham Adjustment Scale-Japanese (NAS-J)                                                                                                                                                                                                          | 1 | Ben. | Experiencing an income change after diagnosis of MS was associated with poorer global mental health                   | Critical | No  |

|              |                                                                                                                                                            |     |           |                                  |                                                                                                                                                  |                                                                                                                                                                                                                                  |     |    |    |                                                                                                          |   |      |                                                                                                                                                                                      |               |     |
|--------------|------------------------------------------------------------------------------------------------------------------------------------------------------------|-----|-----------|----------------------------------|--------------------------------------------------------------------------------------------------------------------------------------------------|----------------------------------------------------------------------------------------------------------------------------------------------------------------------------------------------------------------------------------|-----|----|----|----------------------------------------------------------------------------------------------------------|---|------|--------------------------------------------------------------------------------------------------------------------------------------------------------------------------------------|---------------|-----|
| Kilburn 2016 | Effects of a Large-Scale Unconditional Cash Transfer Program on Mental Health Outcomes of Young People in Kenya                                            | KEN | 2007-2011 | Randomised trial of intervention | Poor households that have at least one orphan or vulnerable child <18 in seven districts in Kenya; respondents aged 15-24 at follow-up (n=1,960) | Cash Transfer for Orphans and Vulnerable Children (CT-OVC): unconditional cash transfer ( <b>increase</b> ) of approx. \$20/month (mean monthly wage per adult in sample at baseline was \$22/month)                             | Yes | No | 48 | CES-D 10                                                                                                 | 3 | Inc. | A Kenyan cash transfer aimed at orphans and vulnerable children reduced likelihood of depression overall, but the effect was concentrated in men (particularly young men)            | Low           | Yes |
| Kilburn 2018 | Paying for Happiness: Experimental Results from a Large Cash Transfer Program in Malawi                                                                    | MWI | 2013-2014 | Randomised trial of intervention | Ultra-poor and labour-constrained households in Malawi (n=2,919)                                                                                 | SCTP: monthly unconditional cash transfer ( <b>increase</b> ) to eligible households which varies depending upon the number of members in the household. Average value of the transfer is 18 percent of pre-program consumption. | No  | No | 17 | Quality of life, 8 items combined into single index                                                      | 1 | Ben. | A Malawian cash transfer programme for ultra poor/labour constrained households was significantly associated with improved quality of life                                           | Some concerns | Yes |
| Klein 2017   | Income and health-related quality of life among prostate cancer patients over a one-year period after radical prostatectomy: a linear mixed model analysis | DEU | 2013-2015 | Basic longitudinal               | All prostate cancer patients aged <65 in Germany attending a radical prostatectomy in two acute care hospitals in Hamburg (n=201)                | Within-person <b>change</b> in household income                                                                                                                                                                                  | No  | No | 6  | European Organization for Research and Treatment of Cancer quality of life questionnaire (EORTC QLQ-C30) | 1 | Ben. | A change in household income after radical prostatectomy was significantly associated with quality of life                                                                           | Serious       | No  |
| Koltai 2018  | Financial circumstances, mastery, and mental health: Taking unobserved time-stable influences into account                                                 | CAN | 2011-2015 | Basic longitudinal               | Canadian residents aged 18+ working a paid job or operating an income-producing business (n=3,805)                                               | Within-person <b>change</b> in whether someone's equivalised household income is below or above the Low-Income Measure Threshold, defined by Statistics Canada                                                                   | Yes | No | 24 | K6                                                                                                       | 1 | Ben. | There was no effect of changes in low income status on K6 scores in Canadian working adults with fixed-effects modelling, though random-effects models did find a significant effect | Moderate      | Yes |

|                |                                                                                                        |     |                           |                                  |                                                                                                                                                                                                         |                                                                                                                                                                                                                                                                                                                                                     |     |    |    |                                                                                                        |    |      |                                                                                                                                                                        |               |     |
|----------------|--------------------------------------------------------------------------------------------------------|-----|---------------------------|----------------------------------|---------------------------------------------------------------------------------------------------------------------------------------------------------------------------------------------------------|-----------------------------------------------------------------------------------------------------------------------------------------------------------------------------------------------------------------------------------------------------------------------------------------------------------------------------------------------------|-----|----|----|--------------------------------------------------------------------------------------------------------|----|------|------------------------------------------------------------------------------------------------------------------------------------------------------------------------|---------------|-----|
| Krauss 2013    | Subjective wellbeing in Colombia : some insights on vulnerability, job security, and relative incomes  | COL | 2010                      | Basic cross-sectional            | Colombian population aged 18-65 (n=2,348)                                                                                                                                                               | If experienced an income <b>increase</b> in last two years                                                                                                                                                                                                                                                                                          | No  | No | 24 | Life satisfaction, 11 point scale (Cantril self-anchoring scale)                                       | 1  | Ben. | Reporting an income increase in the last 2 years was significantly associated with life satisfaction                                                                   | Critical      | No  |
| Kuhn 2011      | The Effects of Lottery Prizes on Winners and Their Neighbors: Evidence from the Dutch Postcode Lottery | NLD | 2003-2006                 | Basic cross-sectional            | Winners: all households in PCL-winning postcodes from six months before September 2003 to six months before July 2006; Controls: neighbouring households which did not win during same period (n=1,879) | Winning the Dutch postcode lottery in last 6 months ( <b>increase</b> ). Average amount won 18,596 euro (approx. 7 months of post-tax income for typical Dutch household). 11.2% of winners also won a BMW, an additional random possibility, worth approx. 25,000 euro.                                                                            | No  | No | 6  | Happiness, 10 point scale                                                                              | 1  | Har. | There were no significant effects of lottery wins in the Dutch Postcode Lottery on happiness                                                                           | Critical      | No  |
| Lachowska 2017 | The Effect of Income on Subjective Well-Being Evidence from the 2008 Economic Stimulus Tax Rebates     | USA | 2008                      | Repeat cross-sectional           | Adults aged 18+ living in United States with gross monthly income <\$6000 (n=17,933)                                                                                                                    | Receiving a tax rebate ( <b>increase</b> ) as a result of the Economic Stimulus Act of 2008, meant to counter impact of Great Recession. Aimed at low and middle-income families, determined on 2007 tax returns. Ranged from \$300-\$600 for single filers and \$600-\$1,200 for joint filers. If dependent child, received extra \$300 per child. | No  | No | 0  | 1. Life satisfaction, 11 point scale (Cantril self-anchoring scale),<br>2. Subjective affect           | 12 | Ben. | A 2008 tax rebate to counter the effects of the Great Recession in the US was associated with improved life satisfaction                                               | Serious       | Yes |
| Lafave 1995    | Partnerships for people with serious mental illness who live below the poverty line                    | CAN | Not reported: likely 1994 | Randomised trial of intervention | People with severe and persistent mental illness who were heavy service users in two counties of Eastern Ontario and lived                                                                              | Cash transfer of \$160 (Canadian) per month for 11 months of study and forgivable loans totalling \$1,800 for the study period ( <b>increase</b> ). Maintained study                                                                                                                                                                                | Yes | No | 11 | 1. Lehman Quality of Life Interview (QOLI),<br>2. Annual number of psychiatric hospital inpatient days | 2  | Har. | A cash transfer for people with serious mental illness to bring them above the poverty line for 11 months was not significantly associated with QoL or inpatient stays | Some concerns | No  |

|              |                                                                                                                            |     |           |                               |                                                                                                                                               |                                                                                                                                                                                                                                               |    |    |    |                                                         |   |      |                                                                                                                                                    |          |     |
|--------------|----------------------------------------------------------------------------------------------------------------------------|-----|-----------|-------------------------------|-----------------------------------------------------------------------------------------------------------------------------------------------|-----------------------------------------------------------------------------------------------------------------------------------------------------------------------------------------------------------------------------------------------|----|----|----|---------------------------------------------------------|---|------|----------------------------------------------------------------------------------------------------------------------------------------------------|----------|-----|
|              |                                                                                                                            |     |           |                               | below the poverty line (n=48)                                                                                                                 | group above poverty line. Control group received \$115 for completing 3 interviews and \$25-\$35 per month in increasing increments for 11 months to maintain contact with project and sponsors. Did not bring this group above poverty line. |    |    |    |                                                         |   |      |                                                                                                                                                    |          |     |
| Lam 2000     | Correlates of improvement in quality of life among homeless persons with serious mental illness                            | USA | 1994-1997 | Basic longitudinal            | People who were homeless, suffered from severe mental illness, and were not involved in ongoing community treatment in 15 US cities (n=4,257) | <b>Change</b> in total income from baseline to 12 months                                                                                                                                                                                      | No | No | 12 | QOLI                                                    | 1 | Ben. | A change in income within the last 12 months was significantly associated with subjective QoL in homeless people with severe mental illness        | Serious  | No  |
| Latif 2015   | Happiness Adaptation to Income: Evidence from Canada                                                                       | CAN | 1994-2009 | Basic longitudinal            | Adults aged 16-65 in ten Canadian provinces (n=5,127)                                                                                         | Within-person <b>changes</b> in household income                                                                                                                                                                                              | No | No | 12 | Happiness, 5 point scale                                | 1 | Ben. | Income changes were significantly associated with happiness in Canadian working-age adults                                                         | Serious  | Yes |
| Lebihan 2018 | The Impact of Universal Child Benefits on Family Health and Behaviours                                                     | CAN | 1994-2009 | Before and after (controlled) | Coupled/partnered mothers of children aged 1-8 years, not living in Quebec (n=5,824)                                                          | Introduction an unconditional child care benefit (UCCB) in July 2006: \$100/month i.e. \$1200 annually for each child under the age of 6 ( <b>increase</b> )                                                                                  | No | No | 0  | Maternal depression, original/unvalidated questionnaire | 1 | Ben. | The introduction of a universal child benefit in Canada was not significantly associated with improved maternal depression                         | Moderate | Yes |
| Lindahl 2005 | Estimating the Effect of Income on Health and Mortality Using Lottery Prizes as an Exogenous Source of Variation in Income | SWE | 1968-1981 | Basic longitudinal            | Swedish population who have won the lottery (n=626)                                                                                           | Winning at least 1,000 SEK on the lottery between 1969 and 1981 ( <b>increase</b> ). No indication of when won, so take amount reported in each survey and divide by number of years since last wave                                          | No | No | 72 | Number of poor mental health related symptoms reported  | 1 | Ben. | The number of mental health symptoms was significantly smaller in people who won larger lottery prizes, compared with those who won smaller prizes | Moderate | No  |



|                |                                                                                  |     |           |                    |                                                                                                                                                                                                                                                                                                                                                                                     |                                                                                                                                                                                                                                                    |     |    |     |                                                                                   |    |      |                                                                                                                                                                                                                                                                                                                                                  |                  |     |
|----------------|----------------------------------------------------------------------------------|-----|-----------|--------------------|-------------------------------------------------------------------------------------------------------------------------------------------------------------------------------------------------------------------------------------------------------------------------------------------------------------------------------------------------------------------------------------|----------------------------------------------------------------------------------------------------------------------------------------------------------------------------------------------------------------------------------------------------|-----|----|-----|-----------------------------------------------------------------------------------|----|------|--------------------------------------------------------------------------------------------------------------------------------------------------------------------------------------------------------------------------------------------------------------------------------------------------------------------------------------------------|------------------|-----|
|                |                                                                                  |     |           |                    |                                                                                                                                                                                                                                                                                                                                                                                     | to generate 'annual' win amount                                                                                                                                                                                                                    |     |    |     |                                                                                   |    |      |                                                                                                                                                                                                                                                                                                                                                  |                  |     |
| Lindqvist 2018 | Long-run Effects of Lottery Wealth on Psychological Well-being                   | SWE | 1994-2016 | Basic longitudinal | 1. Successful players aged 75 or less from 3 of 4 lotteries held in administrative records: all winners from 2 Triss lotteries [1994-2011] and all large prize winners from Kombi lottery [1998-2011] (those who won at least 1M SEK); 2. 4:1 matched non-winning player controls for large prize Kombi winners (based on sex, age and number of tickets in month of win) (n=3,331) | Amount of lottery prize won at any time between 1994 and 2011 ( <b>increase</b> )                                                                                                                                                                  | No  | No | 264 | 1. Happiness, 11 point scale, 2. Life satisfaction, 11 point scale, 3. GHQ        | 15 | Ben. | A lottery win was not associated with changes in happiness or likelihood of common mental disorder in a Swedish population of winners compared with non-winners, or those who won less. There was a significant association with life satisfaction which was slightly larger for those who previously had income above the median, and for women | Moderate AND Low | No  |
| Lorant 2007    | Depression and socio-economic risk factors: 7-year longitudinal population study | BEL | 1992-1999 | Basic longitudinal | Belgian adults aged 16+ (n=11,909)                                                                                                                                                                                                                                                                                                                                                  | Within-person changes in poverty status, defined as living in a household with income less than half of population median, differentiating between <b>decreased</b> and <b>increased</b> poverty. Also, within-person changes in household income. | Yes | No | 12  | Modified version of global depression scale of Health and Daily Living Form (HDL) | 8  | Ben. | Changes in poverty line status were significantly associated with depression scores in the Belgian population, but not with likelihood of depression. The effects of moving out of poverty were larger than moving into poverty. Changes in income were not significantly associated with either type of outcome                                 | Serious          | Yes |
| Lorenz 2000    | After farming: Emotional health trajectories of farm, nonfarm,                   | USA | 1989-1992 | Basic longitudinal | Families in north central Iowa with adolescent children living with both biological                                                                                                                                                                                                                                                                                                 | <b>Change</b> in per capita family income over a three year period, as modelled in latent growth curves                                                                                                                                            | No  | No | 36  | SCL90-R, depression subscale                                                      | 2  | Inc. | Income change over 3 years was not associated with depression in Iowa families                                                                                                                                                                                                                                                                   | Serious          | No  |

|              |                                                                                                                         |     |           |                                  |                                                                                                            |                                                                                                                                                                                                                                                                                                                                                                                                                                                                                                                                                                                                                                                                                                    |     |     |    |                                   |   |      |                                                                                                                                                       |               |     |
|--------------|-------------------------------------------------------------------------------------------------------------------------|-----|-----------|----------------------------------|------------------------------------------------------------------------------------------------------------|----------------------------------------------------------------------------------------------------------------------------------------------------------------------------------------------------------------------------------------------------------------------------------------------------------------------------------------------------------------------------------------------------------------------------------------------------------------------------------------------------------------------------------------------------------------------------------------------------------------------------------------------------------------------------------------------------|-----|-----|----|-----------------------------------|---|------|-------------------------------------------------------------------------------------------------------------------------------------------------------|---------------|-----|
|              | and displaced farm couples                                                                                              |     |           |                                  | parents who had siblings within 4 years of their age (n=700)                                               |                                                                                                                                                                                                                                                                                                                                                                                                                                                                                                                                                                                                                                                                                                    |     |     |    |                                   |   |      |                                                                                                                                                       |               |     |
| Macours 2012 | Cash transfers, behavioral changes, and cognitive development in early childhood: evidence from a randomized experiment | NIC | 2005-2009 | Randomised trial of intervention | Low income mothers in six municipalities in rural Nicaragua affected by drought in previous year (n=1,151) | Basic group received cash transfer ( <b>increase</b> ) every two months, conditional on health check-ups, and additional education transfer for children aged 7-15, conditional on attendance. This was equivalent to 15% of per capita expenditure for average recipient household. A second Training group received Basic plus a scholarship for one member of the household to get vocational training and skills workshops. A third Lump-sum group received Basic plus a one-off payment to start a small nonagricultural activity, conditional on developing business plan - the value was 11% of average household expenditure, so this group got approx. 26% of annual expenditure in total | Yes | Yes | 9  | CES-D 20                          | 4 | Ben. | A small Nicaraguan cash transfer had no significant effect on depression for mothers                                                                  | Some concerns | Yes |
| Maeder 2014  | Earnings-related parental leave benefits and subjective well-being of young mothers:                                    | DEU | 2008-2011 | Before and after (controlled)    | Women living in Germany in 2008 born in one of three birth cohorts (1991-93, 1981-83, or 1971-73) who      | Elterngeld child welfare payment: a new earnings-related benefit, replacing 67% of prior labour earnings to upper bound of 1800                                                                                                                                                                                                                                                                                                                                                                                                                                                                                                                                                                    | No  | No  | 14 | Life satisfaction, 11 point scale | 3 | Inc. | A change to the German child benefit system to make it universal and earnings linked (rather than means-tested) did not improve life satisfaction for | Serious       | Yes |

|                |                                                                                                     |         |           |                    |                                                                                                                                                                                                                    |                                                                                                                                                                                                                                                                                                                                                            |     |    |    |                                                           |   |      |                                                                                                                                              |          |     |
|----------------|-----------------------------------------------------------------------------------------------------|---------|-----------|--------------------|--------------------------------------------------------------------------------------------------------------------------------------------------------------------------------------------------------------------|------------------------------------------------------------------------------------------------------------------------------------------------------------------------------------------------------------------------------------------------------------------------------------------------------------------------------------------------------------|-----|----|----|-----------------------------------------------------------|---|------|----------------------------------------------------------------------------------------------------------------------------------------------|----------|-----|
|                | evidence from a German parental leave reform                                                        |         |           |                    | gave birth in first or last quarter of 2003/04 or 2006/07 (n=615)                                                                                                                                                  | euro/month and lower bound of 300 euro/month. All parents were eligible for up to 12 months after childhood, or 14 months for single parents OR couples where parents share parental leave. Universal and (for majority, though not some low-income parents) more generous ( <b>increase</b> ) than system it replaced, though available for shorter time. |     |    |    |                                                           |   |      | all mothers or when stratifying by partner's education                                                                                       |          |     |
| Markussen 2019 | Economic and Non-economic Returns to Communist Party Membership in Vietnam                          | VN M    | 2012-2014 | Basic longitudinal | Rural households in 12 provinces in Vietnam (n=1,029)                                                                                                                                                              | Within-person <b>changes</b> in household income per capita                                                                                                                                                                                                                                                                                                | No  | No | 24 | Life satisfaction, 4 point scale                          | 1 | Ben. | Income changes were significantly associated with life satisfaction in Vietnam adults                                                        | Moderate | No  |
| McCarthy 2018  | Poverty, Material Hardship, and Mental Health among Workers in Three Front-Line Service Occupations | CAN USA | 2003-2008 | Basic longitudinal | Service workers (barbers/ stylists, food/beverage servers, sex workers) living in Census Metropolitan Area of Victoria, Canada or in three counties of greater metropolitan area of Sacramento, California (n=443) | Within-person <b>change</b> in whether someone was 'income poor', defined as household income below one half of median income of city in which they resided, adjusted for household size and membership                                                                                                                                                    | Yes | No | 12 | 1. Self-rated mental health, 2. Beck Depression Inventory | 2 | Ben. | Changes in whether service workers were below an 'income poor' line were not significantly related to self-rated mental health or depression | Serious  | Yes |
| McKenzie 2014  | Do changes in socioeconomic factors lead to changes in mental health?                               | NZL     | 2004-2009 | Basic longitudinal | Residents of New Zealand living in private dwellings aged 15-60 (n=11,445)                                                                                                                                         | Within-person <b>changes</b> in household income                                                                                                                                                                                                                                                                                                           | No  | No | 24 | 1. SF-36 mental health subscale, 2. K10                   | 2 | Har. | There was no significant relationship between household income changes and either SF-36 or K10 scores                                        | Serious  | Yes |

|               |                                                                                                                                                                                               |     |           |                                  |                                                                   |                                                                                                                                                                                                                                                |     |    |     |                                              |   |      |                                                                                                                                                          |               |     |
|---------------|-----------------------------------------------------------------------------------------------------------------------------------------------------------------------------------------------|-----|-----------|----------------------------------|-------------------------------------------------------------------|------------------------------------------------------------------------------------------------------------------------------------------------------------------------------------------------------------------------------------------------|-----|----|-----|----------------------------------------------|---|------|----------------------------------------------------------------------------------------------------------------------------------------------------------|---------------|-----|
|               | Findings from three waves of a population based panel study                                                                                                                                   |     |           |                                  |                                                                   |                                                                                                                                                                                                                                                |     |    |     |                                              |   |      |                                                                                                                                                          |               |     |
| Melzer 2017   | Migrants' pursuit of happiness: An analysis of the effects of adaptation, social comparison and economic integration on subjective well-being on the basis of German panel data for 1990-2014 | DEU | 1990-2014 | Basic longitudinal               | German adults aged 18-59 who have had at least one job (n=38,615) | Within-person <b>changes</b> in individual income                                                                                                                                                                                              | No  | No | 12  | Life satisfaction, 11 point scale            | 2 | Ben. | Changes in individual income were significantly associated with life satisfaction in German working age adults                                           | Serious       | Yes |
| Milligan 2008 | Do Child Tax Benefits Affect the Wellbeing of Children? Evidence from Canadian Child Benefit Expansions                                                                                       | CAN | 1994-2005 | Other natural experiment         | Canadian women with children <10 years (n=17,287)                 | <b>Changes</b> in amount of child benefit likely received by families across year, province, and number of children due to changes to National Child Benefit Supplement - exploited between-province variation to determine degree of exposure | No  | No | 120 | Maternal depression score adapted from CES-D | 2 | Ben. | Child benefit amount in Canada was significantly associated with mother's depression score, and effect sizes were larger for mothers with less education | Serious       | No  |
| Mohanty 2014  | What Determines Happiness? Income or Attitude: Evidence from the U.S. Longitudinal Data                                                                                                       | USA | 1980-2006 | Basic longitudinal               | US population aged 14 to 21 in 1979 (n=4,500)                     | Within-person <b>changes</b> in income                                                                                                                                                                                                         | No  | No | 228 | Happiness, 4 point scale                     | 2 | Ben. | Income changes were significantly associated with life satisfaction                                                                                      | Serious       | No  |
| Natali 2018   | Does money buy happiness? Evidence from an unconditional                                                                                                                                      | ZMB | 2010-2014 | Randomised trial of intervention | Women with at least one child < 5 in Kaputa, Kalano               | Cash transfer of 120 Zambian Kwacha (roughly \$24) on a bi-monthly basis                                                                                                                                                                       | Yes | No | 48  | Happiness, binary                            | 2 | Ben. | A Zambian unconditional cash transfer scheme increased happiness for women                                                                               | Some concerns | Yes |

|            |                                                                                                                 |     |           |                    |                                                                                                                                                                                           |                                                                                                                                                                                                                                                            |    |     |    |                                            |   |      |                                                                                                                                                                                   |          |     |
|------------|-----------------------------------------------------------------------------------------------------------------|-----|-----------|--------------------|-------------------------------------------------------------------------------------------------------------------------------------------------------------------------------------------|------------------------------------------------------------------------------------------------------------------------------------------------------------------------------------------------------------------------------------------------------------|----|-----|----|--------------------------------------------|---|------|-----------------------------------------------------------------------------------------------------------------------------------------------------------------------------------|----------|-----|
|            | cash transfer in Zambia                                                                                         |     |           |                    | or Shangombo districts (n=2,203)                                                                                                                                                          | <b>(increase)</b> . The transfer represented an increase by 27% to the household's pre-program monthly expenditure and was calculated as an amount sufficient to purchase food equivalent of one meal monthly per day on average for all household members |    |     |    |                                            |   |      |                                                                                                                                                                                   |          |     |
| North 2008 | Family support, family income, and happiness: A 10-year perspective                                             | USA | 1981-1991 | Basic longitudinal | Unmarried population of San Francisco Bay in 1981 (n=195)                                                                                                                                 | Within-person <b>changes</b> in total family income                                                                                                                                                                                                        | No | No  | 72 | Happiness, 5 point scale                   | 1 | Ben. | Income changes for married San Franciscans from 1981-1991 were not significantly associated with happiness                                                                        | Serious  | No  |
| Ong 2018   | The impact of intergenerational financial transfers on health and wellbeing outcomes: A longitudinal study      | AUS | 2001-2015 | Basic longitudinal | Australian population aged 15+ not living with parents (n=3,210)                                                                                                                          | Receiving an intergenerational financial transfer during the last financial year from (i) inheritances or (ii) surviving parents <b>(increase)</b> . Mean/median transfer for inheritance = \$78,000/\$25,000; for parental transfer = \$9,700/\$2,500.    | No | Yes | 12 | SF-36 mental health subscale               | 6 | Har. | Intergenerational transfers were not associated with improved mental health in Australian adults                                                                                  | Moderate | Yes |
| Oshio 2012 | The association between income dynamics and subjective well-being: Evidence from career income records in Japan | JPN | 2011      | Basic longitudinal | Japanese men aged 30-59 in 2009 who registered at an internet survey company, held 2009 Social Security Statements, had no interruption in wage history, and were members of an Employees | The amount of income <b>increase or decrease</b> since the previous year of wage history                                                                                                                                                                   | No | No  | 12 | 1. Life satisfaction, 6 point scale, 2. K6 | 4 | Ben. | Income increases and decreases in Japanese men were mostly not significantly related to life satisfaction or stress except weakly significant results for income increases and K6 | Critical | No  |

|                     |                                                                                                                                         |     |           |                                  |                                                                                                                                     |                                                                                                                                                                                                                                                                                                                 |     |     |     |                                                                                      |   |      |                                                                                                                                                                     |                        |     |
|---------------------|-----------------------------------------------------------------------------------------------------------------------------------------|-----|-----------|----------------------------------|-------------------------------------------------------------------------------------------------------------------------------------|-----------------------------------------------------------------------------------------------------------------------------------------------------------------------------------------------------------------------------------------------------------------------------------------------------------------|-----|-----|-----|--------------------------------------------------------------------------------------|---|------|---------------------------------------------------------------------------------------------------------------------------------------------------------------------|------------------------|-----|
|                     |                                                                                                                                         |     |           |                                  | Pension Insurance scheme (n=1,004)                                                                                                  |                                                                                                                                                                                                                                                                                                                 |     |     |     |                                                                                      |   |      |                                                                                                                                                                     |                        |     |
| Ozer 2011           | Does alleviating poverty affect mothers' depressive symptoms? A quasi-experimental investigation of Mexico's Oportunidades programme    | MEX | 2003      | Other natural experiment         | Women living in poverty in poor rural communities who met all eligibility criteria for Oportunidades (n=6,343)                      | Oportunidades conditional cash transfer programme: income supplementation of ~25% of household income, conditional on accessing pre-natal care, nutrition monitoring and supplementation, well infant care and immunisation, preventive check-ups, and participation in educational workshops <b>(increase)</b> | Yes | Yes | 60  | 1. CES-D 20, 2. PSS                                                                  | 3 | Ben. | A conditional cash transfer scheme for low income women in Mexico led to a significant improvement in depression and stress                                         | Moderate               | Yes |
| Plagerson 2011      | Does money matter for mental health? Evidence from the Child Support Grants in Johannesburg, South Africa                               | ZAF | 2007      | Basic cross-sectional            | Low-income adults aged 18+ living in 5 disadvantaged areas of Johannesburg with children <14 (n=72)                                 | Means-tested cash transfer (Child Support Grant) equivalent to monthly payment of ZAR 210/approx \$28 paid to primary caregiver per child <b>(increase)</b>                                                                                                                                                     | Yes | No  | 108 | 20-item Self-Reporting Questionnaire (SRQ)                                           | 2 | Ben. | Receiving a Child Support Grant in South Africa was associated with improved mental health                                                                          | Critical               | Yes |
| Powell-Jackson 2016 | Cash transfers, maternal depression and emotional well-being: Quasi-experimental evidence from India's Janani Suraksha Yojana programme | IND | 2015      | Other natural experiment         | Women aged 15-49 living in 6 districts of Uttar Pradesh who gave birth in the previous two years in a government facility (n=1,695) | Janani Suraksha Yojana (JSY) payment: a one-off payment of 1400 INR (rural areas) or 1000 INR (urban areas), conditional on giving birth in a health facility <b>(increase)</b>                                                                                                                                 | No  | Yes | 24  | 1. K10, 2. Happiness, 5 point scale                                                  | 4 | Ben. | A maternity payment given at birth in India was associated with reduction in psychological distress and moderate depression, but not severe depression or happiness | Moderate               | Yes |
| Priebe 2013         | Effectiveness of financial incentives to improve adherence to maintenance                                                               | GBR | 2010-2012 | Randomised trial of intervention | Patients aged 18-65 in England and Wales with psychotic disorder who are prescribed long-acting depot                               | Intervention group offered £15 for each injection of antipsychotic drug over 12 month period                                                                                                                                                                                                                    | No  | Yes | 12  | 1. Clinical Improvement component of Clinical Global Impression scale, 2. Subjective | 2 | Ben. | Giving £15 incentives for depot injections in mental health patients resulted in significant impacts on quality of life/life satisfaction, but not a                | Some concerns AND High | Yes |

|              |                                                                                                                                    |     |                           |                          |                                                                                                                                                                                                                        |                                                                                                              |     |    |      |                                  |   |      |                                                                                                                                                                                                                                                                                                                        |          |     |
|--------------|------------------------------------------------------------------------------------------------------------------------------------|-----|---------------------------|--------------------------|------------------------------------------------------------------------------------------------------------------------------------------------------------------------------------------------------------------------|--------------------------------------------------------------------------------------------------------------|-----|----|------|----------------------------------|---|------|------------------------------------------------------------------------------------------------------------------------------------------------------------------------------------------------------------------------------------------------------------------------------------------------------------------------|----------|-----|
|              | treatment with antipsychotics: Cluster randomised controlled trial                                                                 |     |                           |                          | injections of antipsychotics and have poor treatment adherence (n=96)                                                                                                                                                  | (intervals ranged from 1-4 weeks) <b>(increase)</b>                                                          |     |    |      | QoL rated on DIALOG scale        |   |      | clinical improvement in mental health                                                                                                                                                                                                                                                                                  |          |     |
| Proto 2015   | Life satisfaction, income and personality                                                                                          | GBR | 1996-2008                 | Basic longitudinal       | UK population aged 18-65 (n=6,843)                                                                                                                                                                                     | Within-person <b>changes</b> in household income                                                             | No  | No | 12   | Life satisfaction, 7 point scale | 1 | Har. | There was no significant effect of income changes on life satisfaction in the UK population                                                                                                                                                                                                                            | Serious  | No  |
| Radey 2019   | Psychological distress among low-income mothers: the role of public and private safety nets                                        | USA | 1999-2005                 | Basic longitudinal       | Female caregivers of children aged 0-4 or 10-14 in 1999, from Black, Hispanic and White families living in high-poverty neighbourhoods in Boston, Chicago and San Antonio, living below 200% of poverty line (n=1,987) | Within-person <b>change</b> in the percentage of poverty in which a mother lived                             | Yes | No | 48   | BSI                              | 1 | Ben. | Changes in poverty status were significantly associated with distress in mothers of children aged 0-4 in low income neighbourhoods in the US                                                                                                                                                                           | Serious  | No  |
| Raschke 2019 | Unexpected windfalls, education, and mental health: evidence from lottery winners in Germany                                       | DEU | 2000-2011                 | Other natural experiment | German population who have won the lottery (n=237)                                                                                                                                                                     | Receiving a large sum of money as lottery winnings in the last year, worth at least €2,500 <b>(increase)</b> | No  | No | 12   | SF-12 MCS                        | 3 | Har. | Lottery wins were significantly associated with poorer mental health in the following year in German cohort, particularly for those of lower socioeconomic position                                                                                                                                                    | Serious  | Yes |
| Reeve 2011   | Functional and psychological outcomes following burn injury: reduced income and hidden emotions are predictors of greater distress | NZL | Not reported: likely 2009 | Basic cross-sectional    | Adults aged 18+ with burn injuries of >10% total body surface area, who were patients at Middlemore Hospital on North Island (n=50)                                                                                    | Experiencing a reduction in income since the time of the burn <b>(decrease)</b>                              | No  | No | 61.2 | HADS                             | 1 | Har. | Experiencing an income loss following a considerable burn injury within the last 10 years was significantly associated with anxiety and depression (NOTE: authors report this as a positive association but actually it appears to be a negative association i.e. income loss associated with less anxiety/depression) | Critical | No  |

|             |                                                                                                                               |     |            |                               |                                                                                                         |                                                                                                                                                                                                                                                                    |    |    |    |                                                                 |   |      |                                                                                                                                  |          |     |
|-------------|-------------------------------------------------------------------------------------------------------------------------------|-----|------------|-------------------------------|---------------------------------------------------------------------------------------------------------|--------------------------------------------------------------------------------------------------------------------------------------------------------------------------------------------------------------------------------------------------------------------|----|----|----|-----------------------------------------------------------------|---|------|----------------------------------------------------------------------------------------------------------------------------------|----------|-----|
| Reeves 2016 | Reductions in the United Kingdom's Government Housing Benefit and Symptoms of Depression in Low-Income Households             | GBR | 2009-2013  | Before and after (controlled) | UK population aged 16-69 renting housing in the private sector (n=179,037)                              | Reduction in Housing Benefit: reduced payment from median value of local market rent to 30th percentile ( <b>decrease</b> ), and capped amount of money households could receive according to number of bedrooms. Average loss of income per claimant £1,220/year. | No | No | 0  | Self-reported depression, bad nerves or anxiety                 | 1 | Ben. | Reductions in housing benefit in 2011 were significantly associated with self-reported depression in UK population of claimants  | Serious  | Yes |
| Reeves 2017 | Introduction of a National Minimum Wage Reduced Depressive Symptoms in Low-Wage Workers: A Quasi-Natural Experiment in the UK | GBR | 1994-2001  | Before and after (controlled) | UK population aged 22-59 employed at least 1h/week in 1998 and 1999, earning <£4/hr at baseline (n=172) | Introduction of national minimum wage (NMW) of £3.60 ( <b>increase</b> )                                                                                                                                                                                           | No | No | 12 | 1. GHQ, 2. Self-reported anxiety/depression                     | 4 | Ben. | The introduction of a minimum wage in the UK was associated with improvements in GHQ scores and self-reported anxiety/depression | Serious  | Yes |
| Robert 2014 | From the boom to the crisis: changes in employment conditions of immigrants in Spain and their effects on mental health       | ESP | 2008-2011  | Basic longitudinal            | Migrant workers from Colombia, Ecuador, Morocco and Romania (n=182)                                     | Monthly income had <b>increased</b> or <b>decreased</b> compared with baseline three years prior                                                                                                                                                                   | No | No | 36 | GHQ                                                             | 2 | Inc. | Income decreases (but not increases) were significantly associated with likelihood of common mental disorder                     | Critical | Yes |
| Rogers 2001 | Changes in wives' income: Effects on marital happiness, psychological well-being, and the risk of divorce                     | USA | 1980, 1988 | Basic longitudinal            | Married men and women aged <55 living in the United States (n=1,047)                                    | <b>Change</b> in annual income of married women from 1980 to 1988                                                                                                                                                                                                  | No | No | 96 | Individual psychological wellbeing, measured with 21-item scale | 2 | Ben. | Changes in wives' incomes were significantly associated with psychological wellbeing for the women but not the men in a marriage | Serious  | No  |



|                |                                                                                                                      |     |                           |                    |                                                                                                                                                                                                   |                                                                                                                                                                                                                                                                                |     |    |     |                                                                                                                                                                                                                    |   |      |                                                                                                                                                                                        |          |     |
|----------------|----------------------------------------------------------------------------------------------------------------------|-----|---------------------------|--------------------|---------------------------------------------------------------------------------------------------------------------------------------------------------------------------------------------------|--------------------------------------------------------------------------------------------------------------------------------------------------------------------------------------------------------------------------------------------------------------------------------|-----|----|-----|--------------------------------------------------------------------------------------------------------------------------------------------------------------------------------------------------------------------|---|------|----------------------------------------------------------------------------------------------------------------------------------------------------------------------------------------|----------|-----|
| Roh 2014       | The Effects of Income and Skill Utilization on the Underemployed's Self-Esteem, Mental Health, and Life Satisfaction | KOR | Not reported: likely 2012 | Basic longitudinal | Unemployed adults who visited Korean Employment Service Center to receive unemployment insurance benefits, had at least high school diploma and earned more than minimum wage in last job (n=239) | Being under-employed compared with last employment: current earning of at least 20% less than earnings from previous job ( <b>decrease</b> )                                                                                                                                   | No  | No | 18  | 1. GHQ, 2. Life satisfaction- used 4 items from Satisfaction With Life Scale, each with 7-point Likert                                                                                                             | 2 | Har. | After experiencing unemployment, under-employment in the subsequent job (with wages <20% of previous role) was not significantly associated with either GHQ score or life satisfaction | Critical | No  |
| Rosenheck 2000 | Outcomes after initial receipt of social security benefits among homeless veterans with mental illness               | USA | 1992-1999                 | Basic longitudinal | Veterans enrolled in SSA-VA Joint Outreach Initiative between 1992 and 1999 in Manhattan, Brooklyn, Dallas or LA (n=173)                                                                          | Being awarded Social Security Disability Insurance (SSDI) and Supplemental Security Income (SSI) benefits after participation in Joint Outreach Initiative, run by Social Security Administration and Veterans Affairs ( <b>increase</b> ). Mean amount gained \$612.73/month. | Yes | No | 3   | 1. Psychiatric status subscale of Addiction Severity Index (ASI), 2. Lehman's summary measure of subjective QoL                                                                                                    | 2 | Ben. | Veterans receiving increased social security payments after contact with an outreach service had a significant improvement in QoL but not psychiatric problems                         | Critical | Yes |
| Sareen 2011    | Relationship between household income and mental disorders: Findings from a population-based longitudinal study      | USA | 2001-2005                 | Basic longitudinal | US population aged 18+ without mental illness at baseline (n=34,895)                                                                                                                              | Experiencing a <b>decrease or increase</b> in household income during the three-year period                                                                                                                                                                                    | No  | No | 36  | Axis I and Axis I DSM-IV mental disorders diagnosed using the Alcohol Use Disorder and Associated Disabilities Interview Schedule-DSM-IV Version: (1) any incident mood disorder (2) any incident anxiety disorder | 4 | Inc. | Income decreases were associated with 3 year incidence of mood disorder, but no significant results for income increases, or for either on anxiety disorders                           | Serious  | Yes |
| Schollgen 2019 | Income trajectories and subjective well-being: Linking                                                               | DEU | 1999-2012                 | Basic longitudinal | German employees born between 1951 and 1980 who were                                                                                                                                              | Mean <b>change</b> in individual income from timepoint to timepoint                                                                                                                                                                                                            | No  | No | 156 | 1. Life satisfaction, German Satisfaction with Life Scale, 2.                                                                                                                                                      | 4 | Ben. | Income changes were significantly associated with life satisfaction and                                                                                                                | Serious  | No  |

|                |                                                                                                                                             |     |           |                       |                                                                                                                                                                                                                                    |                                                                                                                                                                                                                                                          |    |    |    |                                                                   |   |      |                                                                                                                                                                                                                                                                                                    |          |     |
|----------------|---------------------------------------------------------------------------------------------------------------------------------------------|-----|-----------|-----------------------|------------------------------------------------------------------------------------------------------------------------------------------------------------------------------------------------------------------------------------|----------------------------------------------------------------------------------------------------------------------------------------------------------------------------------------------------------------------------------------------------------|----|----|----|-------------------------------------------------------------------|---|------|----------------------------------------------------------------------------------------------------------------------------------------------------------------------------------------------------------------------------------------------------------------------------------------------------|----------|-----|
|                | administrative records and survey data                                                                                                      |     |           |                       | subject to social security contributions and consented to have survey data linked with employment histories (n=1,566)                                                                                                              | between 1999 and 2011                                                                                                                                                                                                                                    |    |    |    | Scale of Positive and Negative Experiences                        |   |      | affect in German employees                                                                                                                                                                                                                                                                         |          |     |
| Schyns 2001    | Income and satisfaction in Russia                                                                                                           | RUS | 1993-1995 | Basic longitudinal    | Russian population (n not reported)                                                                                                                                                                                                | <b>Change</b> in household income between survey waves                                                                                                                                                                                                   | No | No | 12 | Life satisfaction, 10 point scale                                 | 2 | Ben. | Income changes were significantly associated with life satisfaction in Russian population                                                                                                                                                                                                          | Critical | Yes |
| Sekulova 2013  | Climate change, income and happiness: An empirical study for Barcelona                                                                      | ESP | 2011      | Basic cross-sectional | Adult residents of Barcelona (n=807)                                                                                                                                                                                               | If income had <b>decreased</b> in 2011 compared with recalled income in 2010, 2009 and 2006                                                                                                                                                              | No | No | 60 | Life satisfaction, 10 point scale                                 | 3 | Inc. | 1 year lagged income changes were significantly associated with life satisfaction in Barcelona residents                                                                                                                                                                                           | Critical | Yes |
| Swift 2020     | Association of negative financial shocks during the Great Recession with depressive symptoms and substance use in the USA: the CARDIA study | USA | 1990-2010 | Basic longitudinal    | Black and white adults aged 18-30 years with stable financial wellbeing up to 2005 at four field centres: Universities of Alabama, Minnesota, Northwestern and Kaiser Permanente (n=1,563)                                         | Experiencing a negative income shock i.e. <b>decrease</b> in income bracket from pre-recession (1990-2005) to post-recession (2010). Also sensitivity analysis using 'large income drop' as exposure, defined as a shift of two or more income brackets. | No | No | 60 | CES-D 20                                                          | 1 | Ben. | Income changes were significantly associated with CES-D score in a US cardiac cohort study                                                                                                                                                                                                         | Serious  | Yes |
| Tachibana 2019 | Do remittances alleviate negative impacts of disaster on mental health? A case of the 2015 Nepal earthquake                                 | NPL | 2014-2016 | Basic longitudinal    | 120 sample households who participated in Kumar and Hotchkiss 1988 study on forest depletion and human welfare in 6 villages in Western Nepal. Aimed to sample original respondents OR their children OR someone in HH immediately | Receiving an <b>increase</b> in amount of remittance sent to household or a single individual from family abroad, comparing pre- and post-earthquake                                                                                                     | No | No | 12 | 1. Checklist Civilian (PCL-C) questionnaire for PTSD, 2. CES-D 20 | 8 | Ben. | Increased remittances sent to Nepalese households after a 2015 earthquake resulted in small significant improvements in PTSD and depression symptoms, but remittances to individuals did not. Results were non-significant for a binary threshold indicating clinical levels of PTSD or depression | Serious  | Yes |

|               |                                                                                                                                        |     |           |                                  |                                                                                                                                                                                                 |                                                                                                                                                                                                                                                       |     |    |    |                                                       |   |      |                                                                                                                                                                                                       |                      |     |  |
|---------------|----------------------------------------------------------------------------------------------------------------------------------------|-----|-----------|----------------------------------|-------------------------------------------------------------------------------------------------------------------------------------------------------------------------------------------------|-------------------------------------------------------------------------------------------------------------------------------------------------------------------------------------------------------------------------------------------------------|-----|----|----|-------------------------------------------------------|---|------|-------------------------------------------------------------------------------------------------------------------------------------------------------------------------------------------------------|----------------------|-----|--|
|               |                                                                                                                                        |     |           |                                  | adjacent to original sample (n=335)                                                                                                                                                             |                                                                                                                                                                                                                                                       |     |    |    |                                                       |   |      |                                                                                                                                                                                                       |                      |     |  |
| Thoits 1979   | Income and psychological distress: The impact of an income-maintenance experiment                                                      | USA | 1970-1974 | Randomised trial of intervention | Families with dependent children where household head(s) were aged 18-58 years in low-income areas in Seattle and Denver, only black, white or Chicano ethnicities (n=988)                      | Being assigned to income-maintenance treatment group - amounts varied, but least generous plan just sufficient to bring families up to official poverty line and slightly exceed support available from existing welfare programmes <b>(increase)</b> | Yes | No | 24 | Variant of Macmillan Health Opinion Survey index      | 1 | Har. | An income maintenance programme found mixed results by ethnicity: no evidence found for improvement in psychological distress, but some evidence of potential worsening of distress in some subgroups | High                 | No  |  |
| Thompson 2002 | The mental health status of Filipinas in Queensland                                                                                    | AUS | 1996-1998 | Basic longitudinal               | Filipina women aged 16+ living in Queensland who were involved in 24 community organisations and their social contacts, those involved in church groups, and those working in factories (n=337) | Experiencing a major <b>decrease</b> in financial situation in last 12 months                                                                                                                                                                         | No  | No | 12 | GHQ                                                   | 1 | Ben. | Major worsening of financial situation in last 12 months was significantly associated with GHQ in Filipina women in Australia                                                                         | Serious AND Critical | Yes |  |
| Turvey 2002   | Financial loss and suicidal ideation in a rural community sample                                                                       | USA | 1998      | Basic cross-sectional            | Adults aged 18+ living in a single county in Iowa (n=1,621)                                                                                                                                     | If experienced an income <b>decrease</b> in the last 12 months                                                                                                                                                                                        | No  | No | 12 | Self-reported suicidal ideation in previous 12 months | 1 | Ben. | Substantial income decreases in last 12 months were associated with higher prevalence of suicidal ideation                                                                                            | Critical             | No  |  |
| Wickham 2017  | The effect of a transition into poverty on child and maternal mental health: a longitudinal analysis of the UK Millennium Cohort Study | GBR | 2003-2012 | Basic longitudinal               | Mothers of singleton children born in the UK between 1st Sep 2000 and 11th Jan 2002, with no mental health problems or poverty when child was aged 3 (n=6,063)                                  | Transition into poverty when the child was aged 5, 7 or 11 years, defined as household income less than 60% of national median <b>(decrease)</b>                                                                                                      | Yes | No | 96 | K6                                                    | 1 | Ben. | Moving below the poverty line was significantly associated with mother's depression                                                                                                                   | Serious              | Yes |  |

|                |                                                                                                                          |     |                           |                       |                                                                                                                                                   |                                                                                                                                                      |    |    |    |                                    |   |      |                                                                                                                    |          |     |
|----------------|--------------------------------------------------------------------------------------------------------------------------|-----|---------------------------|-----------------------|---------------------------------------------------------------------------------------------------------------------------------------------------|------------------------------------------------------------------------------------------------------------------------------------------------------|----|----|----|------------------------------------|---|------|--------------------------------------------------------------------------------------------------------------------|----------|-----|
| Wong 2015      | Impact of enforcing a statutory minimum wage on work and quality of life of vulnerable groups in Hong Kong               | HKG | 2010-2012                 | Basic longitudinal    | Adults belonging to vulnerable groups (defined as welfare recipients, new migrant women and low-paid workers) living in Hong Kong (n=253)         | Introduction of statutory minimum wage which set hourly wage rate at 28 HKD <b>(increase)</b>                                                        | No | No | 8  | WHOQOL-BREF                        | 1 | Ben. | There was no significant effect of a minimum wage change in Hong Kong on QoL in vulnerable groups                  | Critical | No  |
| Young 2005     | Economic burdens and quality of life of family caregivers of cancer patients                                             | KOR | Not reported: likely 2003 | Basic cross-sectional | Primary family caregiver aged 18+ for family member with cancer at one of six University Hospitals or the National Cancer Centre in Korea (n=704) | If the impact of the cancer patient's illness (as perceived by caregiver) had included the loss of a major source of family income <b>(decrease)</b> | No | No | 12 | Caregiver QoL Index-cancer (CQOLC) | 1 | Ben. | Experiencing the loss of an income source after a relative gets cancer was associated with reduced quality of life | Critical | Yes |
| Zimmerman 2005 | Socioeconomic status, depression disparities, and financial strain: what lies behind the income-depression relationship? | USA | 1992-1998                 | Basic longitudinal    | US population in 1979 (n=5,604)                                                                                                                   | Within-person <b>changes</b> in household income                                                                                                     | No | No | 48 | CES-D 20                           | 8 | Inc. | There was no significant effect of income changes on CES-D score in a US 1979 cohort                               | Serious  | Yes |

**Table D2: Risk of bias (RoB) domain scores for included non-randomised studies, measured using ROBINS-I**

| Study                | Confounding | Selection      | Classification | Deviations | Missingness    | Outcome measurement | Reporting | Overall score |
|----------------------|-------------|----------------|----------------|------------|----------------|---------------------|-----------|---------------|
| <b>Abbott 2000</b>   | Serious     | Critical       | Moderate       | Low        | Low            | Low                 | Low       | Critical      |
| <b>Abbott 2006</b>   | Critical    | No information | Moderate       | Low        | No information | Low                 | Low       | Critical      |
| <b>Abel 2016</b>     | Critical    | Critical       | Moderate       | Low        | No information | Moderate            | Low       | Critical      |
| <b>Adams 2019</b>    | Serious     | Serious        | Serious        | Low        | No information | Moderate            | Moderate  | Serious       |
| <b>Adeola 2009</b>   | Serious     | Critical       | Serious        | Low        | Serious        | Low                 | Low       | Critical      |
| <b>AIR 2014</b>      | Low         | Low            | Low            | Low        | Low            | Low                 | Low       | Low           |
| <b>Allouche 2019</b> | Serious     | Low            | Low            | Low        | Serious        | Low                 | Low       | Serious       |
| <b>Ambrey 2014</b>   | Moderate    | Low            | Moderate       | Low        | Serious        | Moderate            | Moderate  | Serious       |

|                            |          |          |          |     |                |                                                       |          |          |
|----------------------------|----------|----------|----------|-----|----------------|-------------------------------------------------------|----------|----------|
| <b>Apouey 2015</b>         | Serious  | Serious  | Moderate | Low | Serious        | Low for GHQ<br>Moderate for life sat.                 | Low      | Serious  |
| <b>Arata 2000</b>          | Critical | Critical | Serious  | Low | No information | Low                                                   | Low      | Critical |
| <b>Araya 2003</b>          | Critical | Serious  | Moderate | Low | Low            | Low                                                   | Low      | Critical |
| <b>Asadullah 2012</b>      | Critical | Serious  | Serious  | Low | Low            | Moderate                                              | Low      | Critical |
| <b>Assari 2018</b>         | Serious  | Low      | Moderate | Low | No information | Low                                                   | Low      | Serious  |
| <b>Barbaglia 2015</b>      | Moderate | Low      | Moderate | Low | Low            | Low                                                   | Low      | Moderate |
| <b>Becchetti 2010</b>      | Critical | Critical | Serious  | Low | No information | Serious                                               | Low      | Critical |
| <b>Benzeval 2001</b>       | Serious  | Low      | Moderate | Low | Low            | Low                                                   | Moderate | Serious  |
| <b>Biotteau 2019</b>       | Serious  | Low      | Moderate | Low | Low            | Low                                                   | Low      | Serious  |
| <b>Bland 1996</b>          | Critical | Critical | Serious  | Low | Serious        | Low                                                   | Moderate | Critical |
| <b>BlazquezCuesta 2013</b> | Serious  | Moderate | Moderate | Low | Serious        | Low                                                   | Low      | Serious  |
| <b>Bolden 2010</b>         | Critical | Critical | Moderate | Low | Serious        | Low                                                   | Low      | Critical |
| <b>Bonanno 2007</b>        | Serious  | Serious  | Moderate | Low | Serious        | Low                                                   | Low      | Serious  |
| <b>Boyce 2009</b>          | Critical | Critical | Serious  | Low | No information | Moderate                                              | Low      | Critical |
| <b>Boyce 2013</b>          | Moderate | Moderate | Moderate | Low | Serious        | Low                                                   | Moderate | Serious  |
| <b>Boyce 2018</b>          | Serious  | Moderate | Moderate | Low | Serious        | Moderate                                              | Low      | Serious  |
| <b>Boyd-Swan 2016</b>      | Serious  | Moderate | Low      | Low | Moderate       | Low for CES-D<br>Moderate for happiness               | Low      | Serious  |
| <b>Brenner 2014</b>        | Critical | Critical | Serious  | Low | Serious        | Low                                                   | Low      | Critical |
| <b>Brickman 1978</b>       | Critical | Critical | Low      | Low | Low            | Serious                                               | Low      | Critical |
| <b>Brock 1985</b>          | Critical | Serious  | Moderate | Low | Low            | Low                                                   | Serious  | Critical |
| <b>Burke 1986</b>          | Critical | Serious  | Moderate | Low | Low            | Moderate                                              | Low      | Critical |
| <b>Burmester 2015</b>      | Serious  | Serious  | Low      | Low | Low            | Low                                                   | Low      | Serious  |
| <b>Buttke 2012</b>         | Critical | Serious  | Moderate | Low | Low            | Low for PHQ-2<br>Moderate for mentally unhealthy days | Low      | Critical |
| <b>Cai 2016</b>            | Serious  | Low      | Low      | Low | Moderate       | Moderate                                              | Low      | Serious  |
| <b>Casey 2004</b>          | Critical | Critical | Moderate | Low | Low            | Low                                                   | Low      | Critical |
| <b>Cesarini 2016</b>       | Low      | Low      | Low      | Low | Low            | Low                                                   | Low      | Low      |
| <b>Cheung 2015</b>         | Moderate | Moderate | Moderate | Low | Low            | Moderate                                              | Low      | Moderate |

|                           |          |                |          |         |                |                                                      |         |          |
|---------------------------|----------|----------------|----------|---------|----------------|------------------------------------------------------|---------|----------|
| <b>Chien 2004</b>         | Critical | Serious        | Moderate | Low     | Low            | Low                                                  | Serious | Critical |
| <b>Chin 2018</b>          | Serious  | Low            | Moderate | Low     | Serious        | Low                                                  | Low     | Serious  |
| <b>Chrostek 2016</b>      | Moderate | No information | Low      | Low     | Serious        | Moderate                                             | Low     | Serious  |
| <b>Clark 2016</b>         | Serious  | Moderate       | Moderate | Low     | No information | Moderate                                             | Low     | Serious  |
| <b>Clingingsmith 2016</b> | Serious  | Serious        | Moderate | Low     | Serious        | Low for K6<br>Moderate for life sat.                 | Low     | Serious  |
| <b>Coley 2014</b>         | Serious  | Low            | Moderate | Low     | Low            | Low                                                  | Low     | Serious  |
| <b>Costello 2010</b>      | Moderate | Low            | Low      | Low     | Low            | Low                                                  | Low     | Moderate |
| <b>Daley 2017</b>         | Moderate | Moderate       | Low      | Low     | Low            | Moderate                                             | Low     | Moderate |
| <b>Dang 2019</b>          | Serious  | Moderate       | Low      | Low     | Serious        | Moderate                                             | Low     | Serious  |
| <b>Dearing 2004</b>       | Serious  | Moderate       | Moderate | Low     | Low            | Low                                                  | Low     | Serious  |
| <b>Diener 1993</b>        | Critical | Serious        | Moderate | Low     | Serious        | Low                                                  | Low     | Critical |
| <b>Dolan 2013</b>         | Serious  | Low            | Moderate | Low     | Serious        | Low for Rutter,<br>GHQ, K4<br>Moderate for life sat. | Low     | Serious  |
| <b>Elwell-Sutton 2019</b> | Serious  | Moderate       | Moderate | Low     | No information | Low                                                  | Low     | Serious  |
| <b>Erixson 2017</b>       | Low      | Low            | Low      | Low     | Low            | Low                                                  | Low     | Low      |
| <b>Evans 2005</b>         | Serious  | Critical       | Moderate | Low     | Critical       | Moderate                                             | Low     | Critical |
| <b>Evans 2011</b>         | Serious  | Serious        | Moderate | Low     | No information | Moderate                                             | Low     | Serious  |
| <b>Fang 2017</b>          | Serious  | Low            | Moderate | Low     | Serious        | Moderate                                             | Low     | Serious  |
| <b>Feeny 2014</b>         | Critical | Critical       | Serious  | Low     | No information | Moderate                                             | Low     | Critical |
| <b>Fenn 2015</b>          | Critical | Low            | Low      | Low     | Serious        | Low                                                  | Low     | Critical |
| <b>Frijters 2011</b>      | Moderate | Moderate       | Moderate | Low     | Serious        | Moderate                                             | Low     | Serious  |
| <b>Frijters 2012</b>      | Moderate | Moderate       | Moderate | Low     | Serious        | Moderate                                             | Low     | Serious  |
| <b>Galama 2017</b>        | Serious  | Moderate       | Low      | Low     | Serious        | Moderate                                             | Low     | Serious  |
| <b>Grattan 2017</b>       | Serious  | Critical       | Serious  | Low     | Serious        | Low                                                  | Low     | Critical |
| <b>Gros 2019</b>          | Serious  | Moderate       | Low      | Serious | Low            | Moderate                                             | Low     | Serious  |
| <b>Gulal 2019</b>         | Serious  | Moderate       | Low      | Low     | No information | Moderate                                             | Low     | Serious  |
| <b>Handa 2014</b>         | Serious  | Moderate       | Low      | Serious | Low            | Moderate                                             | Low     | Serious  |
| <b>Hanly 2015</b>         | Critical | Critical       | Moderate | Low     | Low            | Low                                                  | Low     | Critical |
| <b>Hasan 2016</b>         | Serious  | No information | Low      | Low     | Serious        | Serious                                              | Low     | Serious  |
| <b>Hilton 2006</b>        | Critical | Critical       | Moderate | Low     | Moderate       | Low                                                  | Low     | Critical |
| <b>Horn 2017</b>          | Serious  | Moderate       | Low      | Low     | Moderate       | Moderate                                             | Low     | Serious  |

|                       |          |          |          |     |                |                                                      |          |                                                     |
|-----------------------|----------|----------|----------|-----|----------------|------------------------------------------------------|----------|-----------------------------------------------------|
| <b>Huang 2015</b>     | Critical | Critical | Moderate | Low | Low            | Low                                                  | Low      | Critical                                            |
| <b>Ishiguro 2019</b>  | Critical | Critical | Moderate | Low | Serious        | Low                                                  | Low      | Critical                                            |
| <b>Jalal 2015</b>     | Serious  | Low      | Low      | Low | No information | Low                                                  | Low      | Serious                                             |
| <b>Junna 2019</b>     | Moderate | Low      | Moderate | Low | Low            | Low                                                  | Low      | Moderate                                            |
| <b>Kendall 2019</b>   | Moderate | Moderate | Moderate | Low | Serious        | Low                                                  | Low      | Serious                                             |
| <b>Kiernan 2018</b>   | Serious  | Moderate | Moderate | Low | Moderate       | Low for CES-D<br>Moderate for subj.<br>mental health | Low      | Serious                                             |
| <b>Kikuchi 2013</b>   | Critical | Critical | Moderate | Low | No information | Low                                                  | Moderate | Critical                                            |
| <b>Klein 2017</b>     | Serious  | Moderate | Moderate | Low | Low            | Low                                                  | Low      | Serious                                             |
| <b>Koltai 2018</b>    | Moderate | Moderate | Moderate | Low | Moderate       | Low                                                  | Low      | Moderate                                            |
| <b>Krauss 2013</b>    | Critical | Critical | Moderate | Low | No information | Moderate                                             | Low      | Critical                                            |
| <b>Kuhn 2011</b>      | Critical | Critical | Moderate | Low | No information | Moderate                                             | Low      | Critical                                            |
| <b>Lachowska 2017</b> | Serious  | Moderate | Low      | Low | No information | Moderate                                             | Low      | Serious                                             |
| <b>Lam 2000</b>       | Moderate | Low      | Moderate | Low | Serious        | Moderate                                             | Low      | Serious                                             |
| <b>Latif 2015</b>     | Moderate | Moderate | Moderate | Low | Serious        | Moderate                                             | Low      | Serious                                             |
| <b>Lebihan 2018</b>   | Moderate | Low      | Low      | Low | Low            | Low                                                  | Low      | Moderate                                            |
| <b>Lindahl 2005</b>   | Low      | Moderate | Moderate | Low | No information | Moderate                                             | Low      | Moderate                                            |
| <b>Lindqvist 2018</b> | Low      | Low      | Low      | Low | Low            | Low for GHQ<br>Moderate for life<br>sat., happiness  | Low      | Low for GHQ<br>Moderate for life<br>sat., happiness |
| <b>Lorant 2007</b>    | Serious  | Low      | Moderate | Low | Low            | Low                                                  | Moderate | Serious                                             |
| <b>Lorenz 2000</b>    | Serious  | Moderate | Moderate | Low | Serious        | Low                                                  | Low      | Serious                                             |
| <b>Maeder 2014</b>    | Moderate | Moderate | Low      | Low | Serious        | Moderate                                             | Low      | Serious                                             |
| <b>Markussen 2019</b> | Moderate | Low      | Low      | Low | Low            | Moderate                                             | Low      | Moderate                                            |
| <b>McCarthy 2018</b>  | Serious  | Serious  | Moderate | Low | Serious        | Low for Beck<br>Moderate for subj.<br>mental health  | Low      | Serious                                             |
| <b>McKenzie 2014</b>  | Serious  | Moderate | Low      | Low | Serious        | Moderate                                             | Low      | Serious                                             |
| <b>Melzer 2017</b>    | Moderate | Moderate | Moderate | Low | Serious        | Moderate                                             | Low      | Serious                                             |
| <b>Milligan 2008</b>  | Serious  | Moderate | Low      | Low | Serious        | Moderate                                             | Low      | Serious                                             |
| <b>Mohanty 2014</b>   | Moderate | Moderate | Moderate | Low | Serious        | Moderate                                             | Low      | Serious                                             |
| <b>North 2008</b>     | Serious  | Moderate | Moderate | Low | Low            | Moderate                                             | Low      | Serious                                             |
| <b>Ong 2018</b>       | Moderate | Moderate | Moderate | Low | Moderate       | Low                                                  | Low      | Moderate                                            |
| <b>Oshio 2012</b>     | Serious  | Critical | Moderate | Low | Low            | Low for K6                                           | Low      | Critical                                            |

|                            |                                                |                                                |                                                                                 |     |                                           |                                                 |     |                                                |
|----------------------------|------------------------------------------------|------------------------------------------------|---------------------------------------------------------------------------------|-----|-------------------------------------------|-------------------------------------------------|-----|------------------------------------------------|
|                            |                                                |                                                |                                                                                 |     |                                           | Moderate for life sat.                          |     |                                                |
| <b>Ozer 2011</b>           | Moderate                                       | Low                                            | Low                                                                             | Low | Moderate                                  | Low                                             | Low | Moderate                                       |
| <b>Plageron 2011</b>       | Critical                                       | Critical                                       | Moderate                                                                        | Low | Low                                       | Low                                             | Low | Critical                                       |
| <b>Powell-Jackson 2016</b> | Low                                            | Moderate                                       | Moderate                                                                        | Low | Low                                       | Low for K10<br>Moderate for happiness           | Low | Moderate                                       |
| <b>Proto 2015</b>          | Serious                                        | Moderate                                       | Moderate                                                                        | Low | Serious                                   | Moderate                                        | Low | Serious                                        |
| <b>Radey 2019</b>          | Serious                                        | Low                                            | Moderate                                                                        | Low | Low                                       | Low                                             | Low | Serious                                        |
| <b>Raschke 2019</b>        | Serious                                        | Moderate                                       | Moderate                                                                        | Low | Serious                                   | Low                                             | Low | Serious                                        |
| <b>Reeve 2011</b>          | Critical                                       | Critical                                       | Moderate                                                                        | Low | Low                                       | Low                                             | Low | Critical                                       |
| <b>Reeves 2016</b>         | Serious                                        | Serious                                        | Low                                                                             | Low | No information                            | Moderate                                        | Low | Serious                                        |
| <b>Reeves 2017</b>         | Serious                                        | Serious                                        | Moderate                                                                        | Low | Low                                       | Low for GHQ<br>Moderate for subj. mental health | Low | Serious                                        |
| <b>Robert 2014</b>         | Serious                                        | Serious                                        | Moderate                                                                        | Low | Critical                                  | Low                                             | Low | Critical                                       |
| <b>Rogers 2001</b>         | Serious                                        | Low                                            | Moderate                                                                        | Low | Serious                                   | Low                                             | Low | Serious                                        |
| <b>Roh 2014</b>            | Critical                                       | Moderate                                       | Moderate                                                                        | Low | Serious                                   | Low                                             | Low | Critical                                       |
| <b>Rosenheck 2000</b>      | Critical                                       | Low                                            | Moderate                                                                        | Low | Serious                                   | Low                                             | Low | Critical                                       |
| <b>Sareen 2011</b>         | Serious                                        | Low                                            | Moderate                                                                        | Low | Low                                       | Low                                             | Low | Serious                                        |
| <b>Schollgen 2019</b>      | Serious                                        | Moderate                                       | Moderate                                                                        | Low | Moderate                                  | Low                                             | Low | Serious                                        |
| <b>Schyns 2001</b>         | Critical                                       | Moderate                                       | Moderate                                                                        | Low | Serious                                   | Moderate                                        | Low | Critical                                       |
| <b>Sekulova 2013</b>       | Critical                                       | Critical                                       | Moderate                                                                        | Low | No information                            | Low                                             | Low | Critical                                       |
| <b>Swift 2020</b>          | Serious                                        | Moderate                                       | Moderate                                                                        | Low | Serious                                   | Low                                             | Low | Serious                                        |
| <b>Tachibana 2019</b>      | Serious                                        | Low                                            | Moderate for remittances to household<br>Serious for remittances to individuals | Low | Moderate                                  | Low                                             | Low | Serious                                        |
| <b>Thompson 2002</b>       | Serious for follow-up<br>Critical for baseline | Serious for follow-up<br>Critical for baseline | Serious                                                                         | Low | Low for follow-up<br>Serious for baseline | Low                                             | Low | Serious for follow-up<br>Critical for baseline |
| <b>Turvey 2002</b>         | Critical                                       | Serious                                        | Serious                                                                         | Low | Low                                       | Serious                                         | Low | Critical                                       |



|                       |          |          |          |     |          |          |     |          |
|-----------------------|----------|----------|----------|-----|----------|----------|-----|----------|
| <b>Wickham 2017</b>   | Moderate | Low      | Moderate | Low | Moderate | Low      | Low | Serious  |
| <b>Wong 2015</b>      | Critical | Low      | Low      | Low | Serious  | Low      | Low | Critical |
| <b>Young 2005</b>     | Critical | Critical | Serious  | Low | Low      | Low      | Low | Critical |
| <b>Zimmerman 2005</b> | Serious  | Low      | Moderate | Low | Moderate | Moderate | Low | Serious  |

**Table D3: Risk of bias (RoB) domain scores for included randomised controlled trials, measured using ROB-2**

| <b>Study</b>              | <b>Randomisation</b> | <b>Timing</b> | <b>Deviations</b> | <b>Missingness</b>                                     | <b>Measurement</b>                                              | <b>Reporting</b> | <b>Overall score</b>                                   |
|---------------------------|----------------------|---------------|-------------------|--------------------------------------------------------|-----------------------------------------------------------------|------------------|--------------------------------------------------------|
| <b>Baird 2013</b>         | Low                  | Low           | Low               | Low                                                    | Some concerns                                                   | Some concerns    | Some concerns                                          |
| <b>Bedoya 2019</b>        | Low                  | Low           | Low               | Low                                                    | Some concerns                                                   | Low              | Some concerns                                          |
| <b>Courtin 2018</b>       | Low                  | n/a           | Low               | Some concerns                                          | Low for K10<br>Some concerns for subj. distress                 | Some concerns    | Some concerns                                          |
| <b>Dorsett 2014</b>       | Low                  | n/a           | Some concerns     | Low                                                    | Some concerns                                                   | Some concerns    | Some concerns                                          |
| <b>Fernald 2011</b>       | Low                  | Low           | Low               | Low                                                    | Low                                                             | Some concerns    | Some concerns                                          |
| <b>Gassman-Pines 2006</b> | Some concerns        | n/a           | Low               | Low                                                    | Low                                                             | Some concerns    | Some concerns                                          |
| <b>Gennetian 2002</b>     | Some concerns        | n/a           | Low               | Low                                                    | Low                                                             | Some concerns    | Some concerns                                          |
| <b>Green 2016</b>         | Low                  | Low           | Low               | Low                                                    | Low                                                             | Low              | Low                                                    |
| <b>Haushofer 2016</b>     | Low                  | Low           | Some concerns     | Low                                                    | Low for CES-D, Cohens<br>Some concerns for life sat., happiness | Low              | Some concerns                                          |
| <b>Hjelm 2017 (CGP)</b>   | Low                  | Low           | Low               | Low                                                    | Low                                                             | Some concerns    | Some concerns                                          |
| <b>Kilburn 2016</b>       | Low                  | Low           | Low               | Low                                                    | Low                                                             | Low              | Low                                                    |
| <b>Kilburn 2018</b>       | Low                  | Low           | Low               | Low                                                    | Low                                                             | Some concerns    | Some concerns                                          |
| <b>Lafave 1995</b>        | Some concerns        | n/a           | Some concerns     | Low                                                    | Low                                                             | Some concerns    | Some concerns                                          |
| <b>Macours 2012</b>       | Low                  | Low           | Low               | Low                                                    | Low                                                             | Some concerns    | Some concerns                                          |
| <b>Natali 2018</b>        | Low                  | Low           | Low               | Low                                                    | Some concerns                                                   | Some concerns    | Some concerns                                          |
| <b>Priebe 2013</b>        | Low                  | Low           | Low               | Some concerns for clinical improvement<br>High for QoL | Low                                                             | Low              | Some concerns for clinical improvement<br>High for QoL |
| <b>Thoits 1979</b>        | Some concerns        | n/a           | Low               | Some concerns                                          | Low                                                             | Some concerns    | High                                                   |

## Appendix E: List of studies excluded at full text

| #  | Author/Year    | Title                                                                                                                                                          | Where published                                                        | Why excluded               |
|----|----------------|----------------------------------------------------------------------------------------------------------------------------------------------------------------|------------------------------------------------------------------------|----------------------------|
| 1  | Abdoulayi 2015 | Malawi Social Cash Transfer Programme: Midline Impact Evaluation Report.                                                                                       | Chapel Hill: Carolina Population Center                                | Duplicate sample           |
| 2  | Acierno 2019   | Mental Health Correlates of Financial Mistreatment in the National Elder Mistreatment Study Wave II                                                            | Journal of Aging and Health                                            | Incorrect population       |
| 3  | Adams 2006     | A systematic review of the health, social and financial impacts of welfare rights advice delivered in healthcare settings                                      | BMC Public Health                                                      | Systematic review          |
| 4  | Adato 2010     | Conditional Cash Transfers in Latin America                                                                                                                    | Johns Hopkins University Press                                         | Incorrect study type       |
| 5  | Adena 2013     | Poverty and transitions in key areas of quality of life                                                                                                        | De Gruyter: Active Ageing and Solidarity between Generations in Europe | Incorrect study type       |
| 6  | Adoho 2014     | The impact of an adolescent girls employment program: the EPAG project in Liberia                                                                              | The World Bank, Policy Research Working Paper Series: 6832             | No comparator group        |
| 7  | Agyapong 2017  | Microfinance, Rural Non-farm Activities and Welfare Linkages in Ghana: Assessing Beneficiaries' Perspectives                                                   | Global Social Welfare                                                  | No relevant outcome(s)     |
| 8  | Ahmat 2019     | Effects of minimum wage policy implementation: Compensation, work behaviors, and quality of life                                                               | International Journal of Hospitality Management                        | Incorrect exposure         |
| 9  | Ahmed 2019     | Human wellbeing outcomes of involvement in industrial crop production: Evidence from sugarcane, oil palm and jatropha sites in Ghana                           | PLoS ONE                                                               | Incorrect exposure         |
| 10 | Ahn 2010       | La felicidad de los españoles: Factores explicativos. (Some Determinants of Happiness among the Spanish People)                                                | Revista de Economía Aplicada                                           | Incorrect language         |
| 11 | Ahnquist 2007  | Is cumulative exposure to economic hardships more hazardous to women's health than men's? A 16-year follow-up study of the Swedish Survey of Living Conditions | Journal of epidemiology and community health                           | Incorrect exposure         |
| 12 | Ahuvia 2008    | If money doesn't make us happy, why do we act as if it does?                                                                                                   | Journal of Economic Psychology                                         | Incorrect study type       |
| 13 | AIR 2016       | Zambia's Multiple Category Targeting Grant: 36-Month Impact Report.                                                                                            | Washington, DC: American Institutes for Research                       | Duplicate sample           |
| 14 | Akande 2003    | South African women and unemployment: A social-economic perspective                                                                                            | Psikhologicheskii Zhurnal                                              | Unable to source full text |
| 15 | Akay 2016      | Remittances and relative concerns in rural China                                                                                                               | China Economic Review                                                  | Incorrect exposure         |
| 16 | Akay 2019      | Relative concerns and sleep behavior                                                                                                                           | Economics and Human Biology                                            | Incorrect exposure         |
| 17 | Aker 2015      | Comparing cash and voucher transfers in a humanitarian context: evidence from the Democratic Republic of Congo                                                 | World Bank Economic Review                                             | Exact duplicate            |
| 18 | Aker 2017      | Comparing Cash and Voucher Transfers in a Humanitarian Context: Evidence from the Democratic Republic of Congo                                                 | World Bank Economic Review                                             | No relevant outcome(s)     |
| 19 | Aknin 2018     | Buying well-being: Spending behavior and happiness                                                                                                             | Social and Personality Psychology Compass                              | Incorrect study type       |
| 20 | Alcazar 2016   | Impacts of the Peruvian Conditional Cash Transfer Program on Women's Empowerment: A Quantitative and Qualitative Approach                                      | PEP-PMMA, Working Papers                                               | No relevant outcome(s)     |
| 21 | Alderson 2008  | Effects of Employment-Based Programs on Families by Prior Levels of Disadvantage                                                                               | Social Service Review                                                  | No comparator group        |

|    |                        |                                                                                                                                                                                                                         |                                                                                                  |                            |
|----|------------------------|-------------------------------------------------------------------------------------------------------------------------------------------------------------------------------------------------------------------------|--------------------------------------------------------------------------------------------------|----------------------------|
| 22 | Alem 2015              | Consumption Smoothing and the Welfare Cost of Uncertainty                                                                                                                                                               | Centre for Economic Performance, LSE, CEP Discussion Papers                                      | Incorrect exposure         |
| 23 | Ali 1997               | Employment transitions and psychological distress: the contrasting experiences of single and married mothers                                                                                                            | Journal of Health & Social Behavior                                                              | No comparator group        |
| 24 | Ali 2010               | Recovery From Depression Among Clients Transitioning Out of Poverty                                                                                                                                                     | American Journal of Orthopsychiatry                                                              | Incorrect exposure         |
| 25 | Ali 2015               | Empirical Assessment of the Impact of Microfinance on Quality of Life                                                                                                                                                   | Pakistan Business Review                                                                         | No relevant outcome(s)     |
| 26 | Allanson 2008          | Longitudinal analysis of income-related health inequality                                                                                                                                                               | University of Dundee, Economic Studies, Discussion Papers: 214                                   | Incorrect unit of analysis |
| 27 | Amell 2007             | An examination of mental health and mental health trajectories among African American and white men: The effects of poverty and perceived social supports on psychological distress, self-esteem, and life satisfaction | University of Wisconsin-Madison                                                                  | Incorrect exposure         |
| 28 | Amroussia 2017         | Explaining mental health inequalities in Northern Sweden: a decomposition analysis                                                                                                                                      | Global health action                                                                             | Incorrect exposure         |
| 29 | Anand 2018             | Depression and economic status: evidence for non-linear patterns in women from Mexico                                                                                                                                   | Journal of Mental Health                                                                         | Incorrect exposure         |
| 30 | Angeles 2011           | A Closer Look at the Easterlin Paradox                                                                                                                                                                                  | Journal of Socio-Economics                                                                       | Incorrect exposure         |
| 31 | Angeles 2016           | The Social Cash Transfer Programme of Malawi: The Role of Evaluation from the Pilot to the Expansion                                                                                                                    | From Evidence to Action: The Story of Cash Transfers and Impact Evaluation in Sub-Saharan Africa | Incorrect study type       |
| 32 | Antonides 2007         | Income Evaluation and Happiness in the Case of an Income Decline                                                                                                                                                        | Kyklos                                                                                           | No comparator group        |
| 33 | Apouey 2009            | Winning Big but Feeling no Better? The Effect of Lottery Prizes on Physical and Mental Health                                                                                                                           | Fondazione Eni Enrico Mattei, Working Papers: 2009.96                                            | Duplicate analysis         |
| 34 | Apouey 2010            | Winning Big but Feeling No Better? The Effect of Lottery Prizes on Physical and Mental Health                                                                                                                           | Institute of Labor Economics (IZA) discussion paper                                              | Duplicate analysis         |
| 35 | Apouey 2013            | Winning Big But Feeling No Better? The Effect of Lottery Prizes on Physical and Mental Health                                                                                                                           | Paris School of Economics - HAL discussion paper                                                 | Duplicate analysis         |
| 36 | Apouey 2014            | Winning big but feeling no better? The effect of lottery prizes on physical and mental health                                                                                                                           | Centre for Economic Performance discussion paper                                                 | Duplicate analysis         |
| 37 | Argyle 1997            | L'effet des variables environnementales sur le bonheur = The effect of environmental variables on happiness                                                                                                             | Revue Quebequoise de Psychologie                                                                 | Unable to source full text |
| 38 | Ariyabuddhiphongs 2011 | Lottery gambling: A review                                                                                                                                                                                              | Journal of Gambling Studies                                                                      | Incorrect study type       |
| 39 | Armstrong 2018         | Assessing the financial impact of pulmonary hypertension: a survey by the UK Pulmonary Hypertension Association (PHA-UK)                                                                                                | European Respiratory Journal.                                                                    | Incorrect study type       |
| 40 | Arnould 2009           | Does Fair Trade Deliver on Its Core Value Proposition? Effects on Income, Educational Attainment, and Health in Three Countries                                                                                         | Journal of Public Policy & Marketing                                                             | Incorrect exposure         |
| 41 | Arriagada 2015         | Do Payments Pay Off? Evidence from Participation in Costa Rica's PES Program                                                                                                                                            | PLoS ONE                                                                                         | Incorrect unit of analysis |
| 42 | Arthaud-Day 2005       | The wealth of nations and the happiness of nations: Why "accounting" matters                                                                                                                                            | Social Indicators Research                                                                       | Incorrect study type       |
| 43 | Asadullah 2018         | Subjective Well-Being in China, 2005-2010: The Role of Relative Income, Gender, and Location                                                                                                                            | China Economic Review                                                                            | Incorrect exposure         |

|    |                         |                                                                                                                                              |                                                                         |                        |
|----|-------------------------|----------------------------------------------------------------------------------------------------------------------------------------------|-------------------------------------------------------------------------|------------------------|
| 44 | Asoogo 2018             | Experiences of patients diagnosed and living with metastatic breastcancer in Kumasi, Ghana: A lesson to learn from low-middle income country | Journal of Global Oncology                                              | Incorrect study type   |
| 45 | Attah 2016              | Can Social Protection Affect Psychosocial Wellbeing and Why Does This Matter? Lessons from Cash Transfers in Sub-Saharan Africa              | Journal of Development Studies                                          | Incorrect study type   |
| 46 | Awaworyi-Churchill 2019 | Religiosity, Income and Wellbeing in Developing Countries                                                                                    | Empirical Economics                                                     | Incorrect exposure     |
| 47 | Ayala 2013              | Health-related effects of welfare-to-work policies                                                                                           | Social Science & Medicine                                               | Incorrect exposure     |
| 48 | Babic 2015              | RE-INITIATING PROFESSIONAL WORKING ACTIVITY AFTER MYOCARDIAL INFARCTION IN PRIMARY PERCUTANEOUS CORONARY INTERVENTION NETWORKS ERA           | International journal of occupational medicine and environmental health | No comparator group    |
| 49 | Baird 2011              | Income shocks and adolescent mental health                                                                                                   | The World Bank, Policy Research Working Paper Series: 5644              | Duplicate analysis     |
| 50 | Baird 2013              | Girl Power: Cash Transfers and Adolescent Welfare. Evidence from a Cluster-Randomized Experiment in Malawi                                   | National Bureau of Economic Research, Inc, NBER Working Papers: 19479   | No relevant outcome(s) |
| 51 | Baird 2015              | What Happens Once the Intervention Ends? the Medium-Term Impacts of a Cash Transfer Programme in Malawi, 3IE Grantee Final Report            | New Delhi: International Initiative for Impact Evaluation               | Duplicate sample       |
| 52 | Balbinotto 2016         | The impact of socioeconomic factors in the prevalence of depression in Brazil between 1998 and 2008                                          | Value in Health                                                         | Incorrect study type   |
| 53 | Ball 2008               | Absolute income, relative income, and happiness                                                                                              | Social Indicators Research                                              | Incorrect exposure     |
| 54 | Barrett 2018            | The Economics of Poverty Traps                                                                                                               | National Bureau of Economic Research Conference Report series           | Incorrect study type   |
| 55 | Barrientos 2012         | Poverty Transitions among Older Households in Brazil and South Africa                                                                        | European Journal of Development Research                                | Incorrect population   |
| 56 | Barrington-Leigh 2018   | Informing policy priorities using inference from life satisfaction responses in a large community survey                                     | Applied Research in Quality of Life                                     | Exact duplicate        |
| 57 | Barrington-Leigh 2019   | Informing Policy Priorities using Inference from Life Satisfaction Responses in a Large Community Survey                                     | Applied Research in Quality of Life                                     | Incorrect exposure     |
| 58 | Bartolini 2010          | Predicting the Trend of Well-Being in Germany: How Much Do Comparisons, Adaptation and Sociability Matter?                                   | CEPS Instead Working Paper 2010-07                                      | Duplicate analysis     |
| 59 | Bartolini 2011          | Predicting the Trend of Well-Being in Germany: How Much Do Comparisons, Adaptation and Sociability Matter?                                   | DIW Berlin, The German Socio-Economic Panel working paper               | Duplicate analysis     |
| 60 | Bartolini 2013          | Predicting the Trend of Well-Being in Germany: How Much Do Comparisons, Adaptation and Sociability Matter?                                   | Social Indicators Research                                              | Duplicate sample       |
| 61 | Bartolini 2013          | Did the Decline in Social Connections Depress Americans' Happiness?                                                                          | Social Indicators Research                                              | Incorrect exposure     |
| 62 | Bartram 2011            | Economic Migration and Happiness: Comparing Immigrants' and Natives' Happiness Gains From Income                                             | Social Indicators Research                                              | Incorrect exposure     |
| 63 | Bartram 2013            | Happiness and 'economic migration': A comparison of Eastern European migrants and stayers                                                    | Migration Studies                                                       | Incorrect exposure     |
| 64 | Bartram 2015            | Inverting the Logic of Economic Migration: Happiness Among Migrants Moving from Wealthier to Poorer Countries in Europe                      | Journal of Happiness Studies                                            | Incorrect exposure     |

|    |                      |                                                                                                                                        |                                                                                                                       |                            |
|----|----------------------|----------------------------------------------------------------------------------------------------------------------------------------|-----------------------------------------------------------------------------------------------------------------------|----------------------------|
| 65 | Bayer 2015           | Happiness and the Persistence of Income Shocks                                                                                         | American Economic Journal-Macroeconomics                                                                              | Duplicate sample           |
| 66 | Becchetti 2008       | Does money affect happiness and self-esteem? The poor borrowers' perspective in a quasi-natural experiment                             | Associazione Italiana per la Cultura della Cooperazione e del Non Profit                                              | Duplicate analysis         |
| 67 | Becchetti 2008       | Easterlin-types and Frustrated Achievers: the Heterogeneous Effects of Income Changes on Life Satisfaction                             | Faculty of Economics, University of Cambridge, Cambridge Working Papers in Economics                                  | Duplicate analysis         |
| 68 | Becchetti 2009       | When money does not buy happiness: The case of 'frustrated achievers'                                                                  | The Journal of Socio-Economics                                                                                        | No relevant outcome(s)     |
| 69 | Becchetti 2010       | The Money-Happiness Relationship in Transition Countries: Evidence from Albania                                                        | Transition Studies Review                                                                                             | No comparator group        |
| 70 | Becchetti 2011       | The Heterogeneous Effects of Income Changes on Happiness                                                                               | Social Indicators Research                                                                                            | Duplicate sample           |
| 71 | Becchetti 2011       | Income, Relational Goods and Happiness                                                                                                 | Applied Economics                                                                                                     | Incorrect exposure         |
| 72 | Becchetti 2013       | Credit access and life satisfaction: evaluating the nonmonetary effects of micro finance                                               | Applied Economics                                                                                                     | Incorrect exposure         |
| 73 | Beggs 2002           | Income, subjective well-being and the comparative perspective: An examination of relative income and its possible comparison standards | Saint Louis University                                                                                                | Unable to source full text |
| 74 | Behrman 2010         | The Economics of Conditional Cash Transfers                                                                                            | Conditional Cash Transfers in Latin America                                                                           | Incorrect study type       |
| 75 | Behrman 2011         | The Impact of the PROGRESA/Oportunidades Conditional Cash Transfer Program on Health and Related Outcomes for the Aging in Mexico      | Penn Institute for Economic Research, Department of Economics, University of Pennsylvania, PIER Working Paper Archive | No relevant outcome(s)     |
| 76 | Berger 2013          | Happy Working Mothers? Investigating the Effect of Maternal Employment on Life Satisfaction                                            | Economica                                                                                                             | Duplicate sample           |
| 77 | Berzins 2018         | Relationship of employment status and socio-economic factors with distress levels and counselling outcomes during a recession          | Counselling & Psychotherapy Research                                                                                  | Incorrect exposure         |
| 78 | Beser 2005           | Quality of Life in Lymphoma Patients                                                                                                   | Clinical Excellence for Nurse Practitioners                                                                           | Incorrect exposure         |
| 79 | Bhanot 2018          | Workfare, wellbeing and consumption: Evidence from a field experiment with Kenya's urban poor                                          | Journal of Economic Behavior & Organization                                                                           | Incorrect exposure         |
| 80 | Bhuiyan 2019         | Micro-entrepreneurship and subjective well-being: Evidence from rural Bangladesh                                                       | Journal of Business Venturing                                                                                         | Incorrect exposure         |
| 81 | Bijlsma 2017         | Unemployment and subsequent depression: A mediation analysis using the parametric G-formula                                            | Social Science & Medicine                                                                                             | No comparator group        |
| 82 | Binder 2010          | An examination of the dynamics of well-being and life events using vector autoregressions                                              | Journal of Economic Behavior & Organization                                                                           | Duplicate sample           |
| 83 | Binder 2013          | The Structure of Subjective Well-being: A Vector Autoregressive Approach                                                               | Metroeconomica                                                                                                        | Duplicate sample           |
| 84 | Blazquez-Cuesta 2014 | Deprivation and Subjective Well-Being: Evidence from Panel Data                                                                        | Review of Income and Wealth                                                                                           | Duplicate sample           |
| 85 | Boen 2016            | The physiological impacts of wealth shocks in late life: Evidence from the Great Recession                                             | Social Science & Medicine                                                                                             | Incorrect population       |
| 86 | Boes 2004            | Income and Happiness: New Results from Generalized Threshold and Sequential Models                                                     | Institute of Labor Economics (IZA)                                                                                    | Incorrect exposure         |
| 87 | Boes 2010            | The Effect of Income on General Life Satisfaction and Dissatisfaction                                                                  | Social Indicators Research                                                                                            | Duplicate sample           |

|     |                 |                                                                                                                                                                                       |                                                                                           |                            |
|-----|-----------------|---------------------------------------------------------------------------------------------------------------------------------------------------------------------------------------|-------------------------------------------------------------------------------------------|----------------------------|
| 88  | Bonsang 2006    | The relative impact of income and health on the subjective well-being across generations in Europe                                                                                    | Centre de Recherche en Economie Publique et de la Population (CREPP), University of Liège | Incorrect exposure         |
| 89  | Borgen 1996     | Psychological well-being throughout the transition from adolescence to adulthood                                                                                                      | Career Development Quarterly                                                              | Incorrect exposure         |
| 90  | Boyce 2011      | Personality and the marginal utility of income: Personality interacts with increases in household income to determine life satisfaction                                               | Journal of Economic Behavior & Organization                                               | Duplicate sample           |
| 91  | Breslin 2003    | Factors influencing the impact of unemployment on mental health among young and older adults in a longitudinal, population-based survey                                               | Scandinavian Journal of Work, Environment & Health                                        | No comparator group        |
| 92  | Brewer 2014     | Partnership dissolution: how does it affect income, employment and well-being?                                                                                                        | Institute for Social and Economic Research                                                | No comparator group        |
| 93  | Brockmann 2012  | Das Glück der Migranten: eine Lebenslaufanalyse zum subjektiven Wohlbefinden von Migranten der ersten Generation in Deutschland                                                       | DIW Berlin, The German Socio-Economic Panel (SOEP)                                        | Incorrect language         |
| 94  | Brodeur 2012    | Do Higher Childcare Subsidies Improve Parental Well-being? Evidence from Québec's Family Policies                                                                                     | Paris School of Economics - HAL discussion paper                                          | Incorrect exposure         |
| 95  | Brodeur 2013    | Do higher child care subsidies improve parental well-being? Evidence from Quebec's family policies                                                                                    | Journal of Economic Behavior & Organization                                               | Incorrect exposure         |
| 96  | Brown 2020      | Consumption Changes, Not Income Changes, Predict Changes in Subjective Well-Being                                                                                                     | Social Psychological and Personality Science                                              | Duplicate sample           |
| 97  | Bruggink 2016   | Changes between pre-crisis and crisis period in socioeconomic inequalities in health and stimulant use in Netherlands                                                                 | European Journal of Public Health                                                         | Incorrect exposure         |
| 98  | Bruggink 2016   | Changes between pre-crisis and crisis period in socioeconomic inequalities in health and stimulant use in Netherlands. [Portuguese]                                                   | Nederlands Tijdschrift voor Geneeskunde                                                   | Incorrect language         |
| 99  | Brzezinski 2018 | Diagnosing unhappiness dynamics: Evidence from Poland and Russia                                                                                                                      | Journal of Happiness Studies: An Interdisciplinary Forum on Subjective Well-Being         | Exact duplicate            |
| 100 | Brzezinski 2019 | Diagnosing Unhappiness Dynamics: Evidence from Poland and Russia                                                                                                                      | Journal of Happiness Studies                                                              | Incorrect unit of analysis |
| 101 | Buchanan 2009   | Gimme money, that's what I want                                                                                                                                                       | New Scientist                                                                             | Exact duplicate            |
| 102 | Buller 2016     | The way to a man's heart is through his stomach?: a mixed methods study on causal mechanisms through which cash and in-kind food transfers decreased intimate partner violence        | BMC Public Health                                                                         | Incorrect exposure         |
| 103 | Buttke 2012     | Mental health needs assessment after the Gulf Coast oil Spill-Alabama and Mississippi, 2010                                                                                           | Prehospital and Disaster Medicine                                                         | No comparator group        |
| 104 | Buttke 2012     | Mental health needs assessment after the Gulf Coast oil spill-Alabama and Mississippi, 2010                                                                                           | Prehospital & Disaster Medicine                                                           | Exact duplicate            |
| 105 | Calvo 2018      | Does Money Buy Immigrant Happiness?                                                                                                                                                   | Journal of Happiness Studies                                                              | Duplicate sample           |
| 106 | Campbell 2007   | Exploring the relationships between provision of welfare benefits advice and the health of elderly people: a longitudinal observational study and discussion of methodological issues | Health & Social Care in the Community                                                     | Incorrect population       |
| 107 | Caner 2015      | Happiness, Comparison Effects, and Expectations in Turkey                                                                                                                             | Journal of Happiness Studies                                                              | Incorrect exposure         |
| 108 | Cao 2014        | Household income and subjective well-being after spinal cord injury: A longitudinal study                                                                                             | Topics in Spinal Cord Injury Rehabilitation                                               | Incorrect exposure         |

|     |                |                                                                                                                                                                                                       |                                                                                                                                                |                            |
|-----|----------------|-------------------------------------------------------------------------------------------------------------------------------------------------------------------------------------------------------|------------------------------------------------------------------------------------------------------------------------------------------------|----------------------------|
| 109 | Cariappa 2019  | Universal Basic Income for India: The Way towards Right to Equality--A Review                                                                                                                         | Indian Journal of Economics and Development                                                                                                    | Incorrect study type       |
| 110 | Carroll 2005   | Unemployment and Psychological Well-Being                                                                                                                                                             | Centre for Economic Policy Research, Research School of Social Sciences, Australian National University, Discussion Papers: 492                | No comparator group        |
| 111 | Case 2001      | Health, Income and Economic Development                                                                                                                                                               | Princeton University, Woodrow Wilson School of Public and International Affairs, Research Program in Development Studies., Working Papers: 207 | Incorrect exposure         |
| 112 | Case 2002      | Health, income, and economic development                                                                                                                                                              | Annual World Bank Conference on Development Economics 2001/2002                                                                                | Incorrect study type       |
| 113 | Chan 2011      | The Impact of Microloans in Vulnerable Remote Areas: Evidence from Malaysia                                                                                                                           | Asia Pacific Business Review                                                                                                                   | No relevant outcome(s)     |
| 114 | Chang 2013     | Climbing up the social ladders: Identity, relative income, and subjective well-being                                                                                                                  | Social Indicators Research                                                                                                                     | Incorrect exposure         |
| 115 | Cheung 2017    | Income redistribution and life satisfaction                                                                                                                                                           | Michigan State University                                                                                                                      | Incorrect unit of analysis |
| 116 | Cheung 2018    | Income redistribution predicts greater life satisfaction across individual, national, and cultural characteristics                                                                                    | Journal of Personality & Social Psychology                                                                                                     | Incorrect unit of analysis |
| 117 | Chhagan 2008   | The socioeconomic impact of antiretroviral treatment on individuals in Soweto, South Africa                                                                                                           | Health Sociology Review                                                                                                                        | No relevant outcome(s)     |
| 118 | Chin 2010      | Income, health, and well-being in rural Malawi                                                                                                                                                        | Demographic Research                                                                                                                           | Incorrect exposure         |
| 119 | Chin 2012      | Essays on health, mortality, and intergenerational transfers in rural Malawi                                                                                                                          | University of Pennsylvania                                                                                                                     | Unable to source full text |
| 120 | Christian 2019 | Income Shocks and Suicides: Causal Evidence From Indonesia                                                                                                                                            | The Review of Economics and Statistics                                                                                                         | Incorrect unit of analysis |
| 121 | Chu 2014       | Winding road toward the Chinese dream: The U-shaped relationship between income and life satisfaction among Chinese migrant workers                                                                   | Social Indicators Research                                                                                                                     | Incorrect exposure         |
| 122 | Clark 2005     | Heterogeneity in reported well-being: Evidence from twelve European countries                                                                                                                         | Economic Journal                                                                                                                               | Incorrect exposure         |
| 123 | Cockerham 1990 | A test of the relationship between race, socioeconomic status, and psychological distress                                                                                                             | Social Science & Medicine                                                                                                                      | Incorrect exposure         |
| 124 | Coley 2007     | Maternal functioning, time, and money: The world of work and welfare                                                                                                                                  | Children and Youth Services Review                                                                                                             | No comparator group        |
| 125 | Coley 2014     | Low-income women's employment experiences and their financial, personal, and family well-being: JFP JFP                                                                                               | Journal of Family Psychology                                                                                                                   | Exact duplicate            |
| 126 | Commander 2008 | North Birmingham assertive outreach evaluation of service users' quality of life                                                                                                                      | Journal of Mental Health                                                                                                                       | No comparator group        |
| 127 | Coppola 2015   | Smoking, Drinking, Never Thinking of Tomorrow: Income and Risky Choices amongst Young Adults in the UK                                                                                                | Institute of Labor Economics (IZA)                                                                                                             | No relevant outcome(s)     |
| 128 | Craig 2009     | Household income, economic pressure, and depressive mood among unmarried women in midlife: The moderating effects of locus of control, financial instrumental support received from parents, and race | University of North Carolina                                                                                                                   | Incorrect exposure         |
| 129 | Crowe 2016     | Financial hardship, mastery and social support: Explaining poor mental health amongst the inadequately employed using data from the HILDA survey                                                      | SSM - Population Health                                                                                                                        | Incorrect exposure         |

|     |                       |                                                                                                                                                                  |                                                                                                                      |                            |
|-----|-----------------------|------------------------------------------------------------------------------------------------------------------------------------------------------------------|----------------------------------------------------------------------------------------------------------------------|----------------------------|
| 130 | Cutler 2014           | When Does Education Matter? The Protective Effect of Education for Cohorts Graduating in Bad Times                                                               | National Bureau of Economic Research, Inc, NBER Working Papers: 20156                                                | Incorrect exposure         |
| 131 | Cutler 2015           | When does education matter? The protective effect of education for cohorts graduating in bad times                                                               | Social Science & Medicine                                                                                            | Incorrect exposure         |
| 132 | D'Ambrosio 2009       | Satisfaction with Life and Economic Well-Being: Evidence from Germany                                                                                            | Schmollers Jahrbuch: Zeitschrift fur Wirtschafts- und Sozialwissenschaften/Journal of Applied Social Science Studies | Incorrect exposure         |
| 133 | D'Ambrosio 2019       | Money and happiness: Income, wealth and subjective well-being                                                                                                    | Social Indicators Research                                                                                           | Duplicate sample           |
| 134 | DeGarmo 1999          | Social class as a moderator of income effects on stress and health outcomes across nine years                                                                    | Annals of the New York Academy of Sciences                                                                           | Incorrect unit of analysis |
| 135 | deGraaf 2013          | First-incident of DSM-IV mood, anxiety and substance use disorders and its determinants: results from the Netherlands Mental Health Survey and Incidence Study-2 | Journal of Affective Disorders                                                                                       | Duplicate sample           |
| 136 | deRuffi 2018          | Effects of financial precariousness on mental health                                                                                                             | Psychiatria Danubina                                                                                                 | Incorrect exposure         |
| 137 | Diener 1995           | Factors predicting the subjective well-being of nations                                                                                                          | Journal of personality and social psychology                                                                         | Incorrect exposure         |
| 138 | Diener 2002           | Will money increase subjective well-being? A literature review and guide to needed research                                                                      | Social Indicators Research                                                                                           | Incorrect study type       |
| 139 | Diener 2002           | Will money increase subjective well-being?                                                                                                                       | Social Indicators Research                                                                                           | Exact duplicate            |
| 140 | Diener 2009           | Will Money Increase Subjective Well-Being?: A Literature Review and Guide to Needed Research                                                                     | Science of Well-Being: The Collected Works of Ed Diener                                                              | Incorrect study type       |
| 141 | Diener 2009           | Income's Differential Influence on Judgments of Life Versus Affective Well-Being                                                                                 | Assessing Well-Being: The Collected Works of Ed Diener                                                               | Incorrect exposure         |
| 142 | Diener 2013           | Rising income and the subjective well-being of nations                                                                                                           | Journal of Personality & Social Psychology                                                                           | Incorrect exposure         |
| 143 | Dijkstra-Kersten 2015 | Associations of financial strain and income with depressive and anxiety disorders                                                                                | Journal of Epidemiology & Community Health                                                                           | Incorrect exposure         |
| 144 | DiTella 2007          | Happiness Adaptation to Income and to Status in an Individual Panel                                                                                              | National Bureau of Economic Research, Inc, NBER Working Papers: 13159                                                | Duplicate analysis         |
| 145 | DiTella 2008          | Gross national happiness as an answer to the Easterlin Paradox?                                                                                                  | Journal of Development Economics                                                                                     | Incorrect exposure         |
| 146 | DiTella 2010          | Happiness Adaptation to Income and to Status in an Individual Panel                                                                                              | Journal of Economic Behavior and Organization                                                                        | Duplicate sample           |
| 147 | Dolan 2007            | 'Good luck to them if they can get it': exploring working class men's understandings and experiences of income inequality and material standards                 | Sociology of Health & Illness                                                                                        | Incorrect study type       |
| 148 | Dooley 2000           | Underemployment and depression: longitudinal relationships                                                                                                       | Journal of Health & Social Behavior                                                                                  | Duplicate sample           |
| 149 | Duncan 1997           | Income Effects across the Life Span: Integration and Interpretation                                                                                              | Consequences of growing up poor                                                                                      | Incorrect study type       |
| 150 | Easterlin 1995        | WILL RAISING THE INCOMES OF ALL INCREASE THE HAPPINESS OF ALL                                                                                                    | Journal of Economic Behavior & Organization                                                                          | Incorrect study type       |
| 151 | Easterlin 2005        | Diminishing marginal utility of income? Caveat emptor                                                                                                            | Social Indicators Research                                                                                           | Incorrect unit of analysis |
| 152 | Easterlin 2005        | Diminishing Marginal Utility of Income? A Caveat                                                                                                                 | Social Indicators Research                                                                                           | Exact duplicate            |



|     |                |                                                                                                                      |                                                                                                                                                       |                            |
|-----|----------------|----------------------------------------------------------------------------------------------------------------------|-------------------------------------------------------------------------------------------------------------------------------------------------------|----------------------------|
| 153 | Elmes 2019     | Health impacts of a WISE: a longitudinal study                                                                       | Social Enterprise Journal                                                                                                                             | No comparator group        |
| 154 | Emanuel 2000   | What do you advice doc? A citizens advice bureau in primary care in the West Midlands                                | Manchester, Centre for Higher and Adult Education, Faculty of Education, University of Manchester; 2000                                               | Unable to source full text |
| 155 | Eren 2017      | The Determinants of Happiness in Turkey: Evidence from City-Level Data                                               | Journal of Happiness Studies                                                                                                                          | Incorrect exposure         |
| 156 | Eren 2017      | The determinants of happiness in Turkey: Evidence from city-level data                                               | Journal of Happiness Studies: An Interdisciplinary Forum on Subjective Well-Being                                                                     | Exact duplicate            |
| 157 | Ettner 1996    | New evidence on the relationship between income and health                                                           | Journal of Health Economics                                                                                                                           | Incorrect exposure         |
| 158 | Fang 2015      | Do Losses Bite More than Gains? Evidence from a Panel Quantile Regression Analysis of Subjective Well-being in Japan | Nanyang Technological University, School of Humanities and Social Sciences, Economic Growth Centre, Economic Growth Centre Working Paper Series: 1507 | Duplicate analysis         |
| 159 | Feather 1997   | Economic deprivation and the psychological impact of unemployment                                                    | Australian Psychologist                                                                                                                               | Incorrect study type       |
| 160 | Fernald 2009   | Poverty-alleviation program participation and salivary cortisol in very low-income children                          | Social Science and Medicine                                                                                                                           | No relevant outcome(s)     |
| 161 | Fernandes 2018 | A Randomized Controlled Trial of Financial Incentives for Medicaid Beneficiaries with Diabetes                       | Permanente Journal                                                                                                                                    | No relevant outcome(s)     |
| 162 | Flavin 2017    | The State of the Minimum Wage: Federalism, Economic Policy, and Workers' Well-Being                                  | Forum-a Journal of Applied Research in Contemporary Politics                                                                                          | Incorrect unit of analysis |
| 163 | Forget 2011    | The Town with No Poverty: The Health Effects of a Canadian Guaranteed Annual Income Field Experiment                 | Canadian Public Policy-Analyse de Politiques                                                                                                          | No comparator group        |
| 164 | Frescoln 2018  | Work Requirements and Well-Being in Public Housing                                                                   | Cityscape                                                                                                                                             | No comparator group        |
| 165 | Frese 1987     | Alleviating depression in the unemployed: adequate financial support, hope and early retirement                      | Social Science & Medicine                                                                                                                             | Incorrect exposure         |
| 166 | Frey 1999      | Measuring Preferences by Subjective Well-Being                                                                       | Journal of Institutional and Theoretical Economics (JITE)                                                                                             | Incorrect exposure         |
| 167 | Frijters 2001  | The Value of Reunification in Germany: An Analysis of Changes in Life Satisfaction                                   | The University of Melbourne                                                                                                                           | Duplicate analysis         |
| 168 | Frijters 2002  | The Value of Reunification in Germany: An Analysis of Changes in Life Satisfaction                                   | Institute of Labor Economics (IZA)                                                                                                                    | Duplicate analysis         |
| 169 | Frijters 2003  | The Value of Reunification in Germany: An Analysis of Changes in Life Satisfaction                                   | Royal Economics Society Working Paper                                                                                                                 | Duplicate analysis         |
| 170 | Frijters 2003  | Estimating The Causal Effect of Income on Health: Evidence from Post Reunification East Germany                      | Centre for Economic Policy Research, Research School of Social Sciences, Australian National University, Discussion Papers: 465                       | No relevant outcome(s)     |
| 171 | Frijters 2004a | The value of reunification in Germany; An analysis of changes in life satisfaction?                                  | School of Economics and Finance, Queensland University of Technology                                                                                  | Duplicate analysis         |
| 172 | Frijters 2004b | Income and Life Satisfaction in Post-transition Russia: A New Empirical Methodology for Panel Data                   | School of Economics and Finance, Queensland                                                                                                           | Duplicate analysis         |

|     |                    |                                                                                                                                                              |                                                                                                                                                            |                            |
|-----|--------------------|--------------------------------------------------------------------------------------------------------------------------------------------------------------|------------------------------------------------------------------------------------------------------------------------------------------------------------|----------------------------|
|     |                    |                                                                                                                                                              | University of Technology,<br>School of Economics and<br>Finance Discussion Papers and<br>Working Papers Series: 186c                                       |                            |
| 173 | Frijters 2004c     | Investigating the patterns and determinants of life satisfaction in Germany following reunification                                                          | Journal of Human Resources                                                                                                                                 | Duplicate sample           |
| 174 | Frijters 2004d     | Money does matter! Evidence from increasing real income and life satisfaction in East Germany following reunification                                        | American Economic Review                                                                                                                                   | Duplicate sample           |
| 175 | Frijters 2005      | The causal effect of income on health: Evidence from German reunification                                                                                    | Journal of Health Economics                                                                                                                                | No relevant outcome(s)     |
| 176 | Frijters 2005      | The Causal Effect of the Income on Health: Evidence from German Reunification                                                                                | School of Economics and Finance, Queensland University of Technology,<br>School of Economics and Finance Discussion Papers and Working Papers Series: 205b | No relevant outcome(s)     |
| 177 | Frijters 2006      | Can the large swings in russian life satisfaction be explained by ups and downs in real incomes ?                                                            | Scandinavian Journal of Economics                                                                                                                          | Duplicate sample           |
| 178 | Gaarder 2010       | Conditional cash transfers and health: unpacking the causal chain                                                                                            | Journal of Development Effectiveness                                                                                                                       | Systematic review          |
| 179 | Gardner 2006       | Money and Mental Wellbeing : A Longitudinal Study of Medium-Sized Lottery Wins                                                                               | University of Warwick,<br>Department of Economics,<br>The Warwick Economics Research Paper Series (TWERPS)                                                 | Duplicate analysis         |
| 180 | Gardner 2007       | Money and mental wellbeing: a longitudinal study of medium-sized lottery wins                                                                                | Journal of Health Economics                                                                                                                                | Duplicate sample           |
| 181 | Gariepy 2017       | Early-life family income and subjective well-being in adolescents                                                                                            | PLoS ONE [Electronic Resource]                                                                                                                             | Incorrect population       |
| 182 | Gartaula 2012      | Socio-Cultural Dispositions and Wellbeing of the Women Left Behind: A Case of Migrant Households in Nepal                                                    | Social Indicators Research                                                                                                                                 | Incorrect study type       |
| 183 | Gassman-Pines 2013 | How Social Safety Net Programs Affect Family Economic Well-Being, Family Functioning, and Children's Development                                             | Child Development Perspectives                                                                                                                             | Incorrect study type       |
| 184 | Gatina 2016        | Does money buy happiness? Financial and general well-being of immigrants in Australia                                                                        | Journal of Behavioral and Experimental Economics (formerly The Journal of Socio-Economics)                                                                 | Duplicate sample           |
| 185 | Gerber 2013        | Remittances in the Republic of Georgia: Correlates, Economic Impact, and Social Capital Formation                                                            | Demography                                                                                                                                                 | No relevant outcome(s)     |
| 186 | Gibson 2017        | Welfare-to-work interventions and their effects on the mental and physical health of lone parents and their children                                         | Cochrane Database of Systematic Reviews                                                                                                                    | Systematic review          |
| 187 | Gibson 2018        | Welfare-to-work interventions and their effects on the mental and physical health of lone parents and their children                                         | Cochrane Database of Systematic Reviews                                                                                                                    | Exact duplicate            |
| 188 | Gillen 2017        | Do Financial Constraints Affect Depressive Symptomatology Among Mid-Aged and Older Adults?                                                                   | International Journal of Aging & Human Development                                                                                                         | Incorrect population       |
| 189 | Glenn 1998         | Effect of a transient, geographically localised economic recovery on community health and income studied with longitudinal household cohort interview method | Journal of Epidemiology and Community Health                                                                                                               | No comparator group        |
| 190 | Gomez 2013         | Social determinants of health outcomes in older Mexican American cancer survivors                                                                            | Augusta University                                                                                                                                         | Unable to source full text |

|     |                              |                                                                                                                                                  |                                                                                                                                                                       |                            |
|-----|------------------------------|--------------------------------------------------------------------------------------------------------------------------------------------------|-----------------------------------------------------------------------------------------------------------------------------------------------------------------------|----------------------------|
| 191 | Gorgievski-Duijvesteijn 2005 | Finances and well-being: a dynamic equilibrium model of resources                                                                                | Journal of Occupational Health Psychology                                                                                                                             | Incorrect exposure         |
| 192 | Gottlieb 2011                | Depressive Symptoms and Their Social Contexts: a Qualitative Systematic Literature Review of Contextual Interventions                            | International Journal of Social Psychiatry                                                                                                                            | Systematic review          |
| 193 | Gould 2003                   | Essays on Health, Work, Poverty, and Income Inequality                                                                                           | University of Wisconsin                                                                                                                                               | Unable to source full text |
| 194 | Gregg 2007                   | Welfare Reform and Lone Parents in the UK                                                                                                        | Department of Economics, University of Bristol, UK, The Centre for Market and Public Organisation                                                                     | Duplicate sample           |
| 195 | Greyling 2019                | Access to micro- and informal loans: Evaluating the impact on the quality of life of poor females in South Africa                                | South African Journal of Economic and Management Sciences                                                                                                             | Incorrect exposure         |
| 196 | Groot 2000                   | Life-satisfaction and preference drift                                                                                                           | Social Indicators Research                                                                                                                                            | Incorrect exposure         |
| 197 | Grun 2010                    | Is Any Job Better than No Job? Life Satisfaction and Re-employment                                                                               | Journal of Labor Research                                                                                                                                             | Incorrect exposure         |
| 198 | Gudmundsdottir 2013          | The Impact of Economic Crisis on Happiness                                                                                                       | Social Indicators Research                                                                                                                                            | Incorrect exposure         |
| 199 | Gumber 2017                  | Effects of Out-of-Pocket (OOP) payments and financial distress on Quality of Life (QoL) of People with Parkinson's (PwP) and their Carers        | Health and Quality of Life Outcomes. Conference: Patient Reported Outcome Measure's, PROMs Conference: Advances in Patient Reported Outcomes Research. United Kingdom | Incorrect study type       |
| 200 | Gupta 2009                   | Depressive Symptoms and Economic Outcomes of Low-Income Women: A Review of the Social Causation, Social Selection, and Interactionist Hypotheses | Social Issues and Policy Review                                                                                                                                       | Incorrect study type       |
| 201 | Hagen-Zanker 2018            | What are the effects of cash transfers for refugees in the context of protracted displacement? Findings from Jordan                              | International Social Security Review                                                                                                                                  | Incorrect study type       |
| 202 | Halvorsen 2018               | Self-employment in later life: Implications for financial, physical, and mental well-being                                                       | Washington University, St Louis                                                                                                                                       | Incorrect population       |
| 203 | Hansson 2008                 | Impact of changes in life circumstances on subjective well-being in an adult population over a 3-year period                                     | Public Health                                                                                                                                                         | Incorrect exposure         |
| 204 | Hashmi 2020                  | Socioeconomic inequalities in mental health in Australia: Explaining life shock exposure                                                         | Health Policy                                                                                                                                                         | Incorrect exposure         |
| 205 | Haushofer 2013               | Household Response to Income Changes: Evidence from an Unconditional Cash Transfer Program in Kenya.                                             | Princeton University                                                                                                                                                  | Duplicate sample           |
| 206 | Hazell 2019                  | Financial Toxicity in Lung Cancer: An Assessment of Magnitude, Perception, and Impact on Quality of Life                                         | International Journal of Radiation Oncology Biology Physics                                                                                                           | Incorrect study type       |
| 207 | Hazell 2020                  | Financial toxicity in lung cancer: an assessment of magnitude, perception, and impact on quality of life                                         | Annals of Oncology                                                                                                                                                    | Incorrect exposure         |
| 208 | Headey 2004                  | The effects of wealth and income on subjective well-being and ill-being                                                                          | Economic Record                                                                                                                                                       | Incorrect exposure         |
| 209 | Headey 2004                  | Money Doesn't Buy Happiness â€¦ or Does It? A Reconsideration Based on the Combined Effects of Wealth, Income and Consumption                    | Melbourne Institute of Applied Economic and Social Research, The University of Melbourne                                                                              | No relevant outcome(s)     |
| 210 | Headey 2005                  | Money and Happiness: The Combined Effects of Wealth, Income and Consumption                                                                      | Schmollers Jahrbuch: Zeitschrift fur Wirtschafts-                                                                                                                     | Incorrect exposure         |

|     |                 |                                                                                                                                                              |                                                                                   |                        |
|-----|-----------------|--------------------------------------------------------------------------------------------------------------------------------------------------------------|-----------------------------------------------------------------------------------|------------------------|
|     |                 |                                                                                                                                                              | und Sozialwissenschaften/Journal of Applied Social Science Studies                |                        |
| 211 | Headey 2005     | The Importance of Wealth for Subjective Well-Being                                                                                                           | Journal of Financial Transformation                                               | Incorrect exposure     |
| 212 | Headey 2008     | Money does not buy happiness: Or does it? A reassessment based on the combined effects of wealth, income and consumption                                     | Social Indicators Research                                                        | No relevant outcome(s) |
| 213 | Hellevik 2003   | Economy, values and happiness in Norway                                                                                                                      | Journal of Happiness Studies: An Interdisciplinary Forum on Subjective Well-Being | Incorrect exposure     |
| 214 | Hentschel 2017  | The Influence of Major Life Events and Personality Traits on the Stability of Affective Well-Being                                                           | Journal of Happiness Studies                                                      | Duplicate sample       |
| 215 | Hill 1999       | Changes in roles following divorce: Comparison of factors contributing to depression in custodial single mothers and custodial single fathers                | Journal of Divorce & Remarriage                                                   | No comparator group    |
| 216 | Hlouskova 2019  | The Consumption-Investment Decision of a Prospect Theory Household: A Two-Period Model with an Endogenous Second Period Reference Level                      | Journal of Mathematical Economics                                                 | Incorrect study type   |
| 217 | Horiuchi 2006   | The quality of life among persons with severe mental illness enrolled in an assertive community treatment program in Japan: 1-year follow-up and analyses    | Clinical Practice and Epidemiology in Mental Health                               | No comparator group    |
| 218 | Hsiao 2015      | The reductions in monetary cost and gains in productivity with methadone maintenance treatment: one year follow-up                                           | Psychiatry Research                                                               | No comparator group    |
| 219 | Huber 2015      | Financial incentives reduce smoking and improve wellbeing in pregnant women                                                                                  | Psychoneuroendocrinology                                                          | Incorrect study type   |
| 220 | Hunn 2011       | Path analysis of welfare use: Depression as a mediating factor                                                                                               | Journal of Family and Economic Issues                                             | Incorrect exposure     |
| 221 | Hutchinson 2007 | Evaluation of a combined supported computer education and employment training program for persons with psychiatric disabilities                              | Psychiatric Rehabilitation Journal                                                | No comparator group    |
| 222 | Ifcher 2011     | The Happiness of Single Mothers after Welfare Reform                                                                                                         | B E Journal of Economic Analysis & Policy                                         | Incorrect exposure     |
| 223 | Jalal 2009      | Effects of BRAC's poverty reduction program targeting the ultra-poor in rural Bangladesh                                                                     | Cornell University                                                                | Incorrect exposure     |
| 224 | Johnston 1984   | Effects of labelling on income, work and social function among hypertensive employees                                                                        | Journal of Chronic Diseases                                                       | No relevant outcome(s) |
| 225 | Johnston 1984   | EFFECTS OF LABELING ON INCOME, WORK AND SOCIAL FUNCTION AMONG HYPERTENSIVE EMPLOYEES                                                                         | Journal of Chronic Diseases                                                       | Exact duplicate        |
| 226 | Jones 2008      | Health, Income and Relative Deprivation: Evidence from the BHPS                                                                                              | Journal of Health Economics                                                       | Duplicate sample       |
| 227 | Juarez 2019     | Effects of non-health-targeted policies on migrant health: a systematic review and meta-analysis                                                             | The Lancet Global Health                                                          | Systematic review      |
| 228 | Kafle 2017      | Impact of Coordinated Asset Transfers and Asset Ownership on Poverty Reduction, Women's Empowerment, and Child Education: Evidence from Zambia, and Tanzania | University of Illinois                                                            | No relevant outcome(s) |
| 229 | Kaplan 2008     | Socioeconomic determinants of psychological well-being: the role of income, income change, and income sources during the course of 29 years                  | Annals of Epidemiology                                                            | No relevant outcome(s) |

|     |                  |                                                                                                                                                        |                                                                                |                            |
|-----|------------------|--------------------------------------------------------------------------------------------------------------------------------------------------------|--------------------------------------------------------------------------------|----------------------------|
| 230 | Kapteyn 1985     | The Impact of Changes in Income and Family Composition on Subjective Measures of Well-Being                                                            | Horizontal Equity, Uncertainty, and Economic Well-Being                        | Incorrect study type       |
| 231 | Karanikolos 2016 | Effects of the Global Financial Crisis on Health in High-Income Oecd Countries: A Narrative Review                                                     | International Journal of Health Services                                       | Systematic review          |
| 232 | Kaur 2017        | The role of socio-economic factors on the onset of comorbidity in primary care consulters with osteoarthritis: A prospective cohort study              | Rheumatology (United Kingdom)                                                  | Incorrect study type       |
| 233 | Kelly 2009       | Financial implications for patients and their families having treatment for head and neck cancer : Another aspect of quality of life                   | Supportive Care in Cancer                                                      | Incorrect study type       |
| 234 | Kenny 2009       | THERE'S MORE TO LIFE THAN MONEY: EXPLORING THE LEVELS/GROWTH PARADOX IN INCOME AND HEALTH                                                              | Journal of International Development                                           | No relevant outcome(s)     |
| 235 | Keuschnigg 2012  | Rich and satisfied? Theoretical considerations and empirical results on the association between wealth and life satisfaction                           | Berliner Journal Fur Soziologie                                                | Incorrect language         |
| 236 | Kikuchi 2011     | Impact and characteristics of quality of life in Japanese patients with multiple sclerosis                                                             | Quality of Life Research                                                       | Duplicate sample           |
| 237 | Kikuchi 2011     | Structural equation modelling of contributing factors to quality of life in Japanese patients with multiple sclerosis                                  | Multiple Sclerosis                                                             | Incorrect study type       |
| 238 | Kikuchi 2013     | Structural equation modeling of factors contributing to quality of life in Japanese patients with multiple sclerosis                                   | BMC Neurology                                                                  | Exact duplicate            |
| 239 | Kilburn 2016     | Effects of a Large-Scale Unconditional Cash Transfer Program on Mental Health Outcomes of Young People in Kenya                                        | Journal of Adolescent Health                                                   | Duplicate analysis         |
| 240 | Kim 2003         | Depressive symptoms across adolescence and young adulthood in men: Predictions from parental and contextual risk factors                               | Development and Psychopathology                                                | Incorrect exposure         |
| 241 | Kim 2007         | Socioeconomic status and age trajectories of health                                                                                                    | Social Science & Medicine                                                      | Incorrect exposure         |
| 242 | Kim 2016         | The effect of childhood and current economic status on depressive symptoms in South Korean individuals: a longitudinal study                           | International Journal for Equity in Health                                     | Incorrect exposure         |
| 243 | Kincaid 1995     | MARITAL SEPARATION - CAUSES, COPING, AND CONSEQUENCES                                                                                                  | Journal of Divorce & Remarriage                                                | No comparator group        |
| 244 | King 2004        | Moving to Opportunity and Tranquility: Neighborhood Effects on Adult Economic Self-Sufficiency and Health from a Randomized Housing Voucher Experiment | Harvard University, John F. Kennedy School of Government, Working Paper Series | Incorrect exposure         |
| 245 | Klaas 2011       | Change in socio-economic status related to psychosocial factors among youth with spinal cord injury                                                    | Topics in Spinal Cord Injury Rehabilitation                                    | Incorrect study type       |
| 246 | Knab 2008        | The Effects of Welfare and Child Support Policies on Maternal Health and Well-Being                                                                    | Making Americans Healthier: Social and Economic Policy as Health Policy        | Incorrect exposure         |
| 247 | Knabe 2011       | Quantifying the psychological costs of unemployment: the role of permanent income                                                                      | Applied Economics                                                              | Duplicate sample           |
| 248 | Koltai 2018      | Socioeconomic status, stress exposure, and psychological well-being: Complexities in the stress process                                                | University of Toronto                                                          | Duplicate analysis         |
| 249 | Kongsakon 2009   | Quality of life among the navies at six months after the tsunami in phang-nga naval base, phangnga province, Thailand                                  | European Psychiatry                                                            | Incorrect study type       |
| 250 | Kongsakon 2012   | Quality of life among the navies and their spouses survivors, six months after the tsunami disaster in Phang-Nga Naval Base, Thailand                  | Journal of the Medical Association of Thailand                                 | Unable to source full text |

|     |                    |                                                                                                                                                   |                                                                                                   |                            |
|-----|--------------------|---------------------------------------------------------------------------------------------------------------------------------------------------|---------------------------------------------------------------------------------------------------|----------------------------|
| 251 | Kopasker 2018      | Economic insecurity: A socioeconomic determinant of mental health                                                                                 | Ssm-Population Health                                                                             | Duplicate sample           |
| 252 | Kotsis 2018        | Sustained income reductions during economic recession predict depression onset in people with chronic illnesses: A 6-month prospective study      | Journal of Psychosomatic Research                                                                 | Incorrect study type       |
| 253 | Kramer 2018        | Relative Earnings and Depressive Symptoms among Working Parents: Gender Differences in the Effect of Relative Income on Depressive Symptoms       | Sex Roles                                                                                         | Incorrect exposure         |
| 254 | Kronenberg 2017    | The impact of the UK National Minimum Wage on mental health                                                                                       | SSM - Population Health                                                                           | Duplicate sample           |
| 255 | Kuroki 2018        | Subjective well-being and minimum wages: Evidence from U.S. states                                                                                | Health Economics                                                                                  | Incorrect exposure         |
| 256 | Kuruville 2007     | Poverty, social stress & mental health                                                                                                            | Indian Journal of Medical Research                                                                | Incorrect study type       |
| 257 | Lachowska 2015     | The Effect of Income on Subjective Well-Being: Evidence from the 2008 Economic Stimulus Tax Rebates                                               | W.E. Upjohn Institute for Employment Research, Upjohn Working Papers and Journal Articles: 15-238 | Duplicate analysis         |
| 258 | Lakshmanasamy 2010 | Are You Satisfied with Your Income? The Economics of Happiness in India                                                                           | Journal of Quantitative Economics, New Series                                                     | Unable to source full text |
| 259 | Layard 2007        | The Marginal Utility of Income                                                                                                                    | Centre for Economic Performance, LSE, CEP Discussion Papers                                       | Incorrect exposure         |
| 260 | Layard 2008        | The marginal utility of income                                                                                                                    | Journal of Public Economics                                                                       | Incorrect exposure         |
| 261 | Le 2012            | Analysis of medical expenditure and socio-economic status in patients with ocular chemical burns in East China: a retrospective study             | BMC Public Health                                                                                 | No comparator group        |
| 262 | Lee 2011           | Happiness, Adaptation, and Decreasing Marginal Utility of Income                                                                                  | Journal of Private Enterprise                                                                     | Incorrect study type       |
| 263 | Leigh 2019         | Minimum wages and public health: A literature review                                                                                              | Preventive Medicine                                                                               | Systematic review          |
| 264 | Leszko 2019        | The Effectiveness of Psychoeducational and Financial Intervention to Support Caregivers of Individuals With Alzheimer's Disease in Poland         | Innovation in Aging                                                                               | Incorrect population       |
| 265 | Li 2016            | Why Economic Growth Did Not Translate into Increased Happiness: Preliminary Results of a Multilevel Modeling of Happiness in China                | Social Indicators Research                                                                        | Incorrect exposure         |
| 266 | Liker 1982         | Wage and status effects of employment on affective well-being among ex-felons                                                                     | American Sociological Review                                                                      | No comparator group        |
| 267 | Littrell 2011      | The influence of orphan care and other household shocks on health status over time: a longitudinal study of children's caregivers in rural Malawi | Aids Care-Psychological and Socio-Medical Aspects of Aids/Hiv                                     | Incorrect exposure         |
| 268 | Liu 2012           | Individual Well-Being in Urban China: The Role of Income Expectations                                                                             | China Economic Review                                                                             | Incorrect exposure         |
| 269 | Ludbrook 2004      | Do Interventions to Increase Income Improve the Health of the Poor in Developed Economies and Are Such Policies Cost Effective?                   | Applied Health Economics and Health Policy                                                        | Systematic review          |
| 270 | Luhmann 2011       | Stability and variability in the relationship between subjective well-being and income                                                            | Journal of Research in Personality                                                                | No comparator group        |
| 271 | Lund 2011          | Poverty and mental disorders: Breaking the cycle in low-income and middle-income countries                                                        | The Lancet                                                                                        | Systematic review          |

|     |                    |                                                                                                                                                         |                                                                                               |                        |
|-----|--------------------|---------------------------------------------------------------------------------------------------------------------------------------------------------|-----------------------------------------------------------------------------------------------|------------------------|
| 272 | Lund 2011          | Global Mental Health 1 Poverty and mental disorders: breaking the cycle in low-income and middle-income countries                                       | Lancet                                                                                        | Exact duplicate        |
| 273 | Luo 2017           | Income growth and happiness growth in China                                                                                                             | Economic and Political Studies-Eps                                                            | Incorrect exposure     |
| 274 | Máté 2007          | Anyagi helyzet és boldogság: Kapcsolat individuális és nemzetközi szinten = Happiness and financial status: Connection on individual and national level | Mentálhigiéné és Pszichoszomatika                                                             | Incorrect language     |
| 275 | Macours 2008       | Cash transfers, behavioral changes, and cognitive development in early childhood: evidence from a randomized experiment                                 | The World Bank Policy Research Working Paper                                                  | Duplicate analysis     |
| 276 | Madden 2009        | Mental stress in Ireland, 1994-2000: a stochastic dominance approach                                                                                    | Health Economics                                                                              | Incorrect exposure     |
| 277 | Madden 2011        | The Impact of an Economic Boom on the Level and Distribution of Subjective Well-Being: Ireland, 1994-2001                                               | Journal of Happiness Studies                                                                  | No relevant outcome(s) |
| 278 | Madhani 2015       | Participation in Micro-Finance Programmes and Women's Mental Health in South Asia: A Modified Systematic Review                                         | Journal of Development Studies                                                                | Systematic review      |
| 279 | Mahadea 2008       | Economic Growth, Income and Happiness: An Exploratory Study                                                                                             | South African Journal of Economics                                                            | Incorrect exposure     |
| 280 | Mahadea 2013       | ON THE ECONOMICS OF HAPPINESS: THE INFLUENCE OF INCOME AND NON-INCOME FACTORS ON HAPPINESS                                                              | South African Journal of Economic and Management Sciences                                     | Incorrect exposure     |
| 281 | Mahadea 2014       | On the Economics of Happiness: The Influence of Income and Non-income Factors on Happiness                                                              | South African Journal of Economic and Management Sciences, N.S.                               | Exact duplicate        |
| 282 | Mahmutefendic 2013 | Ekonomija sreće. (Economics of Happiness. With English summary.)                                                                                        | Socioeconomica                                                                                | Incorrect language     |
| 283 | Mammen 2009        | Life Satisfaction among Rural Low-income Mothers: The Influence of Health, Human, Personal, and Social Capital                                          | University of Massachusetts Amherst, Department of Resource Economics, Working Papers: 2009-2 | Incorrect exposure     |
| 284 | Marinescu 2018     | No Strings Attached: The Behavioral Effects of U.S. Unconditional Cash Transfer Programs                                                                | National Bureau of Economic Research, Inc, NBER Working Papers: 24337                         | Incorrect study type   |
| 285 | Marks 1999         | Influences and consequences of well-being among Australian young people: 1980-1995                                                                      | Social Indicators Research                                                                    | No comparator group    |
| 286 | Markussen 2018     | The happy farmer: Self-employment and subjective well-being in rural Vietnam                                                                            | Journal of Happiness Studies: An Interdisciplinary Forum on Subjective Well-Being             | Incorrect exposure     |
| 287 | Martikainen 2003   | Effects of income and wealth on GHQ depression and poor self rated health in white collar women and men in the Whitehall II study                       | Journal of epidemiology and community health                                                  | Incorrect exposure     |
| 288 | Martinez 2018      | The Impacts of Cash Transfers on Subjective Wellbeing and Poverty: The Case of Colombia                                                                 | Journal of Family and Economic Issues                                                         | No relevant outcome(s) |
| 289 | McAllister 2018    | How do macro-level structural determinants affect inequalities in mental health? - a systematic review of the literature                                | International Journal for Equity in Health                                                    | Systematic review      |
| 290 | McBride 2007       | Money, Happiness, and Aspirations: An Experimental Study                                                                                                | University of California-Irvine, Department of Economics, Working Papers: 060721              | Incorrect exposure     |
| 291 | McBride 2010       | Money, happiness, and aspirations: An experimental study                                                                                                | Journal of Economic Behavior & Organization                                                   | Incorrect exposure     |

|     |                 |                                                                                                                                                                           |                                                                  |                        |
|-----|-----------------|---------------------------------------------------------------------------------------------------------------------------------------------------------------------------|------------------------------------------------------------------|------------------------|
| 292 | McCloud 2019    | Financial stress and mental health among higher education students in the UK up to 2018: rapid review of evidence                                                         | Journal of epidemiology and community health                     | Systematic review      |
| 293 | McCormick 2016  | High Financial Strain, but Not Poverty or Lower Education, Increases the Risk of Incident Depression in Systemic Lupus Erythematosus (SLE)                                | Arthritis & Rheumatology                                         | Incorrect study type   |
| 294 | McGarrigle 2012 | The impact of being the intermediate caring generation on self-reported health of older women in Ireland: Analysis of the Irish longitudinal study of ageing (TILDA 2010) | Irish Journal of Medical Science                                 | Incorrect study type   |
| 295 | McGarrigle 2013 | The impact of being the intermediate caring generation on self-reported health of older women in Ireland. Analysis of the IRISH longitudinal study on ageing (TILDA 2010) | Age and Ageing                                                   | Incorrect study type   |
| 296 | McInerney 2013  | Recession depression: Physical and mental health effects of the 2008 stock market crash                                                                                   | Journal of Mental Health Policy and Economics                    | Incorrect study type   |
| 297 | McInerney 2013  | Recession depression: mental health effects of the 2008 stock market crash                                                                                                | Journal of Health Economics                                      | Incorrect population   |
| 298 | Mehlis 2018     | Financial toxicity in patients with colorectal and neuroendocrine tumors: Impact of a chronic disease on patients' economic situation                                     | Oncology Research and Treatment                                  | Incorrect study type   |
| 299 | Melzer 2012     | Migrant's Pursuit of Happiness: The Impact of Adaption, Social Comparison and Relative Deprivation; Evidence from a 'Natural' Experiment                                  | DIW Berlin, The German Socio-Economic Panel (SOEP)               | Duplicate analysis     |
| 300 | Mendolia 2011   | The impact of husband's job loss on partners' mental health                                                                                                               | University Library of Munich                                     | Duplicate analysis     |
| 301 | Mendolia 2014   | The impact of husband's job loss on partners' mental health                                                                                                               | Review of Economics of the Household                             | Duplicate sample       |
| 302 | Mentzakis 2009  | The poor, the rich and the happy: Exploring the link between income and subjective well-being                                                                             | The Journal of Socio-Economics                                   | Duplicate sample       |
| 303 | Meraya 2018     | Heterogeneous Relationships between Labor Income and Health by Race/Ethnicity                                                                                             | Health Services Research                                         | Duplicate sample       |
| 304 | Mervin 2014     | Is shared misery double misery?                                                                                                                                           | Social Science and Medicine                                      | Duplicate sample       |
| 305 | Mesch 1999      | The effects of hospital closure on mental health workers: An overview of employment, mental and physical health, and attitudinal outcomes                                 | Journal of Behavioral Health Services & Research                 | No comparator group    |
| 306 | Meyer 2008      | Changes in the Consumption, Income, and Well-Being of Single Mother Headed Families                                                                                       | American Economic Review                                         | No relevant outcome(s) |
| 307 | Michaud 2008    | Health and wealth of elderly couples: Causality tests using dynamic panel data models                                                                                     | Journal of Health Economics                                      | Incorrect population   |
| 308 | Minkin 2017     | Income and Wellbeing in a Society on the Verge to Market Integration: The Case of the Tsimane' in the Bolivian Amazon                                                     | Journal of Happiness Studies                                     | Incorrect exposure     |
| 309 | Miret 2016      | Effect of economic crises on suicide rates                                                                                                                                | Understanding suicide: From diagnosis to personalized treatment. | Incorrect study type   |
| 310 | Missen 2012     | The financial and psychological impacts on mothers of children with chronic fatigue syndrome (CFS/ME): [1]                                                                | Child Care, Health and Development                               | No comparator group    |
| 311 | Missen 2012     | The financial and psychological impacts on mothers of children with chronic fatigue syndrome (CFS/ME)                                                                     | Child: Care, Health & Development                                | Exact duplicate        |
| 312 | Mitrut 2011     | Do private and public transfers received affect life satisfaction? Evidence from Romania                                                                                  | Journal of Economic Psychology                                   | Incorrect exposure     |



|     |                      |                                                                                                                                                                      |                                                                            |                            |
|-----|----------------------|----------------------------------------------------------------------------------------------------------------------------------------------------------------------|----------------------------------------------------------------------------|----------------------------|
| 313 | Mohamadza<br>eh 2013 | The Effect of Income on Labor Force Happiness in Iran. (In Farsi. With English summary.)                                                                             | Tahghighat-e-Eghtesadi                                                     | Incorrect language         |
| 314 | Mohindra<br>2008     | On poverty and health: An interventionist perspective; a study of women microcredit groups in Kerala, India                                                          | Universite de Montreal                                                     | Incorrect exposure         |
| 315 | Mok 2018             | Family income inequalities and trajectories through childhood and self-harm and violence in young adults: a population-based, nested case-control study              | The Lancet Public Health                                                   | Incorrect exposure         |
| 316 | Moorhead<br>2003     | Child and adolescent predictors for eating disorders in a community population of young adult women                                                                  | International Journal of Eating Disorders                                  | Incorrect exposure         |
| 317 | Moren-Cross<br>2004  | The effects of life course poverty on depression                                                                                                                     | Gerontologist                                                              | Incorrect study type       |
| 318 | Morente<br>2016      | DETERMINANTS AND IMPACT OF ECONOMIC CRISIS ON THE MENTAL HEALTH OF POPULATION OF SPAIN                                                                               | Revista Rol De Enfermeria                                                  | Unable to source full text |
| 319 | Morris 2010          | Conditional Cash Transfer Programs and Health                                                                                                                        | Conditional Cash Transfers in Latin America                                | Incorrect study type       |
| 320 | Mossakowski<br>2008  | Dissecting the Influence of Race, Ethnicity, and Socioeconomic Status on Mental Health in Young Adulthood                                                            | Research on Aging                                                          | Incorrect exposure         |
| 321 | Mota-Pereira<br>2012 | Unemployment and income lowering increase risk of depression relapse                                                                                                 | European Psychiatry. Conference: 20th European Congress of Psychiatry, EPA | Incorrect study type       |
| 322 | MotaPereira<br>2015  | Financial crisis increases the risk of depression relapse                                                                                                            | Journal of Psychiatric Research                                            | Incorrect exposure         |
| 323 | Muller 2003          | Money or time? Comparing the effects of time structure and financial deprivation on the psychological distress of unemployed adults                                  | Australian Journal of Psychology                                           | Incorrect exposure         |
| 324 | Muskin 2000          | Earnings changes                                                                                                                                                     | The American journal of psychiatry                                         | Incorrect study type       |
| 325 | Nam 2016             | Financial Difficulty Effects on Depressive Symptoms Among Dementia Patient Caregivers                                                                                | Community Mental Health Journal                                            | Incorrect exposure         |
| 326 | Nars 2007            | Modern science of happiness and role of money                                                                                                                        | Ekonomiska Samfundets Tidskrift                                            | Incorrect study type       |
| 327 | Nars 2007            | Den moderna lyckoforskningen och pengarnas roll. (Modern Happiness Science and Money. With English summary.)                                                         | Ekonomiska Samfundets Tidskrift                                            | Exact duplicate            |
| 328 | Navarro 2018         | INCOME AND SUBJECTIVE WELL-BEING: THE SOCIAL COMPARISONS EFFECT                                                                                                      | Revista de Economia Mundial                                                | Incorrect language         |
| 329 | Navarro 2018         | Ingreso y bienestar subjetivo: El efecto de las comparaciones sociales. (Income and Subjective Well-Being: The Social Comparisons Effect. With English summary.)     | Revista de Economia Mundial                                                | Exact duplicate            |
| 330 | Nelson 2015          | Prevalence and predictors of anxiety and depression among allogeneic hematopoietic cell transplant patients                                                          | Psycho-Oncology                                                            | Incorrect study type       |
| 331 | Ngo 2016             | Community engagement compared with technical assistance to disseminate depression care among low-income, minority women: A randomized controlled effectiveness study | American Journal of Public Health                                          | Incorrect exposure         |
| 332 | Nikolova<br>2015     | In transit: The well-being of migrants from transition and post-transition countries                                                                                 | Journal of Economic Behavior & Organization                                | No comparator group        |
| 333 | Nikolova<br>2019     | Switching to self-employment can be good for your health                                                                                                             | Journal of Business Venturing                                              | Duplicate sample           |
| 334 | Nissle 2002          | Winning the jackpot and depression: Money cannot buy happiness                                                                                                       | International Journal of Psychiatry in Clinical Practice                   | Incorrect study type       |

|     |                  |                                                                                                                                                                           |                                                                                              |                            |
|-----|------------------|---------------------------------------------------------------------------------------------------------------------------------------------------------------------------|----------------------------------------------------------------------------------------------|----------------------------|
| 335 | Noble 2012       | "The day the welfare rights lassie rang, I felt this whole weight had been lifted" how welfare rights advice can help with the psychological and social impacts of cancer | Psycho-Oncology                                                                              | Incorrect study type       |
| 336 | Noel-Miller 2010 | DEPRESSION AMONG ADULT-CHILD CAREGIVERS: THE EFFECT OF CARE-RECEIVING PARENT'S FINANCIAL TRANSFER                                                                         | Gerontologist                                                                                | Incorrect study type       |
| 337 | O'Brien 2011     | Poverty, Inequality and Subjective Quality of Life in Rural Russia during the Transition to a Market Economy: 1991-2006                                                   | Poverty and Public Policy                                                                    | Incorrect exposure         |
| 338 | O'Campo 1998     | Welfare reform and women's health: review of the literature and implications for state policy                                                                             | Journal of Public Health Policy                                                              | Incorrect study type       |
| 339 | O'Connor 2017    | Who Suffered Most from the Great Recession? Happiness in the United States                                                                                                | Rsf-the Russell Sage Journal of the Social Sciences                                          | Incorrect exposure         |
| 340 | Okada 1997       | Health and earned income: Recursive and non-recursive models                                                                                                              | Columbia University                                                                          | Unable to source full text |
| 341 | Ong 2019         | Reducing debt improves psychological functioning and changes decision-making in the poor                                                                                  | Proceedings of the National Academy of Sciences of the United States of America              | Incorrect exposure         |
| 342 | Oshio 2013       | The association of life satisfaction and self-rated health with income dynamics among male employees in Japan                                                             | Japan and the World Economy                                                                  | Duplicate analysis         |
| 343 | Owusu-Addo 2018  | The impact of cash transfers on social determinants of health and health inequalities in sub-Saharan Africa: a systematic review                                          | Health Policy and Planning                                                                   | Systematic review          |
| 344 | Ozdamar 2017     | The Causal Effects of Income Support and Housing Benefits on Mental Well-Being: An Application of a Bayesian Network                                                      | Metroeconomica                                                                               | Duplicate sample           |
| 345 | Parker 2016      | What Effect Did the Global Financial Crisis Have Upon Youth Wellbeing? Evidence From Four Australian Cohorts                                                              | Developmental Psychology                                                                     | Incorrect exposure         |
| 346 | Paul 2013        | Income-happiness paradox in Australia: Testing the theories of adaptation and social comparison                                                                           | Economic Modelling                                                                           | Duplicate sample           |
| 347 | Paxson 2007      | Does money matter? The effects of cash transfers on child health and development in rural Ecuador.                                                                        | The World Bank Policy Research Working Paper Series: Policy Research Working Paper; No. 4226 | Duplicate sample           |
| 348 | Paxson 2010      | Does money matter? The effects of cash transfers on child development in rural Ecuador                                                                                    | Economic Development & Cultural Change                                                       | Duplicate sample           |
| 349 | Payne 2019       | Private Intergenerational Transfers, Family Structure, and Health in a sub-Saharan African Context                                                                        | Population and Development Review                                                            | No relevant outcome(s)     |
| 350 | Pedersen 2009    | Happiness in Europe: Cross-Country Differences in the Determinants of Subjective Well-Being                                                                               | Institute of Labor Economics (IZA)                                                           | No relevant outcome(s)     |
| 351 | Pedersen 2011    | Happiness in Europe: Cross-country differences in the determinants of satisfaction with main activity                                                                     | The Journal of Socio-Economics                                                               | No relevant outcome(s)     |
| 352 | Pedersen 2011    | Happiness in Europe                                                                                                                                                       | Journal of Socio-Economics                                                                   | No relevant outcome(s)     |
| 353 | Pega 2013        | In-work tax credits for families and their impact on health status in adults                                                                                              | Cochrane Database of Systematic Reviews                                                      | Systematic review          |
| 354 | Pega 2015        | Unconditional cash transfers for assistance in humanitarian disasters: Effect on use of health services and health outcomes in low- and middle-income countries           | Cochrane Database of Systematic Reviews                                                      | Systematic review          |
| 355 | Pega 2017        | Unconditional cash transfers for reducing poverty and vulnerabilities: effect on use of health services and health outcomes in low- and middle-income countries           | Cochrane Database of Systematic Reviews                                                      | Systematic review          |
| 356 | Perova 2010      | Three Essays on Intended and Not Intended Impacts of Conditional Cash Transfers                                                                                           | University of California, Berkeley                                                           | No relevant outcome(s)     |

|     |                      |                                                                                                                                                                  |                                                                                                                     |                        |
|-----|----------------------|------------------------------------------------------------------------------------------------------------------------------------------------------------------|---------------------------------------------------------------------------------------------------------------------|------------------------|
| 357 | Pettifor 2016        | The impact of a cash transfer on young South African women's on mental health: HPTN 068                                                                          | Journal of the International AIDS Society                                                                           | Incorrect study type   |
| 358 | Pettifor 2016        | The impact of a cash transfer on young South African women's on mental health: HPTN 068                                                                          | Journal of the International AIDS Society                                                                           | Exact duplicate        |
| 359 | Pollmann-Schult 2014 | Parenthood and Life Satisfaction: Why Don't Children Make People Happy?                                                                                          | Journal of Marriage and Family                                                                                      | Duplicate sample       |
| 360 | Pool 2015            | NEGATIVE WEALTH SHOCK AND THE ASSOCIATIONS WITH DEPRESSION AND MEDICATION NON-ADHERENCE: SUPPORT FOR A LIFE COURSE SENSITIVE PERIOD                              | Gerontologist                                                                                                       | Incorrect study type   |
| 361 | Pool 2017            | Negative wealth shock and short-term changes in depressive symptoms and medication adherence among late middle-aged adults                                       | Journal of Epidemiology & Community Health                                                                          | Incorrect exposure     |
| 362 | Poresky 2001         | Two-year comparison of income, education, and depression among parents participating in regular Head Start or supplementary Family Service Center Services       | Psychological Reports                                                                                               | No comparator group    |
| 363 | Pouwels 2008         | Income, Working Hours, and Happiness                                                                                                                             | Economics Letters                                                                                                   | Incorrect exposure     |
| 364 | Powdthavee 2010      | How much does money really matter? Estimating the causal effects of income on happiness                                                                          | Empirical Economics                                                                                                 | Duplicate sample       |
| 365 | Powdthavee 2014      | Economic Approaches to Understanding Change in Happiness                                                                                                         | Institute of Labor Economics (IZA)                                                                                  | Incorrect study type   |
| 366 | Prause 2009          | Income Volatility and Psychological Depression                                                                                                                   | American Journal of Community Psychology                                                                            | Duplicate sample       |
| 367 | Proto 2012           | Life Satisfaction, Household Income and Personality Traits                                                                                                       | University of Warwick, Department of Economics, The Warwick Economics Research Paper Series (TWERPS)                | Duplicate analysis     |
| 368 | Pymont 2017          | Within-person analysis of welfare transitions in a longitudinal panel survey reveals change in mental health service use                                         | Journal of Public Health                                                                                            | No comparator group    |
| 369 | Quadir 2019          | How are the surviving workers of the Rana Plaza factory collapse in Bangladesh doing: quality of life, participation restriction, income and occupation          | Disability and rehabilitation                                                                                       | No comparator group    |
| 370 | Raphael 2005         | Researching income and income distribution as determinants of health in Canada: gaps between theoretical knowledge, research practice, and policy implementation | Health Policy                                                                                                       | Incorrect study type   |
| 371 | Raschke 2013         | Essays on the Impact of Income on Family and Child Well-Being                                                                                                    | Louisiana State University                                                                                          | No relevant outcome(s) |
| 372 | Rebeira 2017         | Essays on the economics of longevity                                                                                                                             | University of Toronto                                                                                               | Incorrect exposure     |
| 373 | Reich 2005           | Living wage policies at the San Francisco Airport: Impacts on workers and businesses                                                                             | Industrial Relations                                                                                                | No relevant outcome(s) |
| 374 | RobertRoca 2013      | Changes in employment conditions and mental health during the economic crisis in migrant workers in Spain                                                        | Occupational and Environmental Medicine. Conference: 23rd Conference on Epidemiology in Occupational Health, EPICOH | Incorrect study type   |
| 375 | Rodgers 2001         | Income, health, and the National Lottery: BMJ BMJ                                                                                                                | British Medical Journal                                                                                             | Incorrect study type   |
| 376 | Rohde 2014           | The Effect of Economic Insecurity on Mental Health: Recent Evidence from Australian Panel Data                                                                   | Griffith University, Department of Accounting, Finance and Economics                                                | Duplicate analysis     |

|     |                  |                                                                                                                                                                    |                                                                                     |                        |
|-----|------------------|--------------------------------------------------------------------------------------------------------------------------------------------------------------------|-------------------------------------------------------------------------------------|------------------------|
| 377 | Rohde 2016       | The effect of economic insecurity on mental health: Recent evidence from Australian panel data                                                                     | Social Science & Medicine                                                           | Duplicate sample       |
| 378 | Rokhim 2016      | Does microcredit improve wellbeing? Evidence from Indonesia                                                                                                        | Humanomics                                                                          | No relevant outcome(s) |
| 379 | Roll 2010        | Intergenerational financial transfers and mental health: an analysis using SHARE-Israel data                                                                       | Aging & Mental Health                                                               | Incorrect exposure     |
| 380 | Rotermann 2007   | Marital breakdown and subsequent depression                                                                                                                        | Health Reports                                                                      | Incorrect exposure     |
| 381 | Sabarwal 2010    | How do women weather economic shocks ? a review of the evidence                                                                                                    | The World Bank, Policy Research Working Paper Series: 5496                          | Incorrect study type   |
| 382 | Santalahti 2012  | Children of the recession study I: Are there long-term effects of economic recession on offspring mental health and integration to society?                        | Neuropsychiatrie de l'Enfance et de l'Adolescence                                   | Incorrect study type   |
| 383 | Sato 2017        | The Impact of Job Loss on Health. (In Japanese. With English summary.)                                                                                             | Keizai Bunseki                                                                      | Incorrect language     |
| 384 | Schlegel 2012    | Predictors of depressive symptoms among breast cancer patients during the first year post diagnosis                                                                | Psychology & Health                                                                 | Incorrect exposure     |
| 385 | Schneider 2009   | Impact of supported employment on service costs and income of people with mental health needs                                                                      | Journal of Mental Health                                                            | No relevant outcome(s) |
| 386 | Schnittker 2008  | Diagnosing our national disease: Trends in income and happiness, 1973 to 2004                                                                                      | Social Psychology Quarterly                                                         | Incorrect exposure     |
| 387 | Schofield 2018   | Family Health and Income: A Two-Sample Replication                                                                                                                 | Journal of Family Psychology                                                        | Exact duplicate        |
| 388 | Schurer 2016     | HAPPINESS, INCOME AND HETEROGENEITY                                                                                                                                | Singapore Economic Review                                                           | Duplicate sample       |
| 389 | Schwandt 2018    | Wealth Shocks and Health Outcomes: Evidence from Stock Market Fluctuations                                                                                         | American Economic Journal-Applied Economics                                         | Incorrect population   |
| 390 | Schyns 1999      | Income, Change in Income and Life-Satisfaction: A Study over Time in West Germany and the Russian Federation                                                       | Vierteljahrshefte zur Wirtschaftsforschung / Quarterly Journal of Economic Research | Duplicate sample       |
| 391 | Schyns 2000      | The relationship between income, changes in income and life-satisfaction in West Germany and the Russian Federation: relative, absolute, or a combination of both? | Advances in Quality of Life Theory and Research                                     | Incorrect study type   |
| 392 | Scoppa 2008      | An empirical study of happiness in Italy                                                                                                                           | B E Journal of Economic Analysis & Policy                                           | Incorrect exposure     |
| 393 | Sherman 2016     | Impact of socioeconomic disparities on the 12-item short-form health survey (SF-12) quality of life instrument among osteoarthritis patients                       | Value in Health                                                                     | Incorrect study type   |
| 394 | Silverstein 2006 | Intergenerational transfers and living arrangements of older people in rural China: consequences for psychological well-being                                      | Journals of Gerontology Series B-Psychological Sciences & Social Sciences           | Incorrect population   |
| 395 | Sipe 2015        | Effects of mental health benefits legislation: A community guide systematic review                                                                                 | American Journal of Preventive Medicine                                             | Systematic review      |
| 396 | Soeda 2011       | Organ donation in Japan: A longitudinal study of quality of life of living liver donors                                                                            | Transplant International                                                            | Incorrect study type   |
| 397 | Song 2009        | Psychological health in residents participating in clean-up works of Hebei spirit oil spill. [Korean]                                                              | Journal of Preventive Medicine and Public Health                                    | Incorrect language     |
| 398 | Song 2009        | [Psychological health in residents participating in clean-up works of Hebei Spirit oil spill]                                                                      | Journal of Preventive Medicine & Public Health / Yebang Uihakhoe Chi                | Exact duplicate        |
| 399 | Song 2016        | HEALTH CONSEQUENCES OF RURAL-TO-URBAN MIGRATION: EVIDENCE FROM PANEL DATA IN CHINA                                                                                 | Health Economics                                                                    | No relevant outcome(s) |

|     |                      |                                                                                                                                                                                                                                                     |                                                                                                                            |                            |
|-----|----------------------|-----------------------------------------------------------------------------------------------------------------------------------------------------------------------------------------------------------------------------------------------------|----------------------------------------------------------------------------------------------------------------------------|----------------------------|
| 400 | Soto 2013            | Who Can Buy Happiness? Personality Traits Moderate the Effects of Stable Income Differences and Income Fluctuations on Life Satisfaction                                                                                                            | Social Psychological and Personality Science                                                                               | Duplicate sample           |
| 401 | Stillman 2012        | Miserable Migrants? Natural Experiment Evidence on International Migration and Objective and Subjective Well-Being                                                                                                                                  | Institute of Labor Economics (IZA)                                                                                         | Incorrect exposure         |
| 402 | Strandh 2001         | State intervention and mental well-being among the unemployed                                                                                                                                                                                       | Journal of Social Policy                                                                                                   | Incorrect exposure         |
| 403 | Strauss 2004         | Indonesian living standards: Before and after the financial crisis                                                                                                                                                                                  | RAND Corporation Monograph Series. Santa Monica, Calif.: RAND Corporation; Singapore: Institute of Southeast Asian Studies | Incorrect study type       |
| 404 | Stuckler 2017        | Austerity and health: the impact in the UK and Europe                                                                                                                                                                                               | European Journal of Public Health                                                                                          | Incorrect study type       |
| 405 | Swift 2019           | Causal inference approaches for understanding the social determinants of substance abuse and depression in the 21st century: The opioid epidemic and the great recession                                                                            | University of Miami                                                                                                        | Unable to source full text |
| 406 | Tainaka 1998         | Workers' stress after Hanshin-Awaji earthquake in 1995-- symptoms related to stress after 18 months. [Japanese]                                                                                                                                     | Sangyo eiseigaku zasshi = Journal of occupational health                                                                   | Incorrect exposure         |
| 407 | Tainaka 1998         | [Workers' stress after Hanshin-Awaji earthquake in 1995-- symptoms related to stress after 18 months]                                                                                                                                               | Sangyo Eiseigaku Zasshi                                                                                                    | Exact duplicate            |
| 408 | Tamayofonseca 2018   | Contribution of the economic crisis to the risk increase of poor mental health in a region of Spain                                                                                                                                                 | International Journal of Environmental Research and Public Health                                                          | Incorrect exposure         |
| 409 | Thiede 1997          | Mutual influences of health and poverty. Evidence from German panel data                                                                                                                                                                            | Social Science and Medicine                                                                                                | No relevant outcome(s)     |
| 410 | Thomas 2007          | Psychological distress after employment transitions: the role of subjective financial position as a mediator                                                                                                                                        | Journal of Epidemiology & Community Health                                                                                 | Incorrect exposure         |
| 411 | Tiwari 2019          | Long-Term Effects of Temporary Income Shocks on Food Consumption and Subjective Well-Being                                                                                                                                                          | Journal of Development Studies                                                                                             | No relevant outcome(s)     |
| 412 | Todd 2007            | Three Essays on the Indirect Impacts of Conditional Cash Transfer Programs in Mexico and Nicaragua                                                                                                                                                  | American University                                                                                                        | No relevant outcome(s)     |
| 413 | Tsai 2016            | Associations of various perceived-stress situations with depressive symptoms in $\geq 50$ -year old Taiwanese men and women: Results from the Taiwan Longitudinal Study on Aging                                                                    | Archives of Gerontology & Geriatrics                                                                                       | Incorrect exposure         |
| 414 | Tseng 2012           | Handling the endogeneity of income to health using a field experiment in Taiwan                                                                                                                                                                     | University of Dundee, Economic Studies, Discussion Papers: 263                                                             | Incorrect population       |
| 415 | Tsui 2014            | What Affects Happiness: Absolute Income, Relative Income or Expected Income?                                                                                                                                                                        | Journal of Policy Modeling                                                                                                 | Incorrect exposure         |
| 416 | Ullah 1990           | The association between income, financial strain and psychological well-being among unemployed youths                                                                                                                                               | Journal of Occupational Psychology                                                                                         | Incorrect exposure         |
| 417 | Unger 2018           | Age and gender differences in the impact of labour-market transitions on subjective health in Germany                                                                                                                                               | Scandinavian Journal of Public Health                                                                                      | Incorrect exposure         |
| 418 | Urbanos-Garrido 2013 | Desempleo y salud: Un analisis de la repercusion de la crisis economica sobre la salud de los espanoles. (Unemployment and Health: An Analysis of the Impact of the Economic Crisis on the Health of the Spanish Population. With English summary.) | Estudios de Economia Aplicada                                                                                              | Incorrect language         |
| 419 | VandenBroeck 2017    | Does Off-Farm Wage Employment Make Women in Rural Senegal Happy?                                                                                                                                                                                    | Feminist Economics                                                                                                         | Incorrect exposure         |

|     |                 |                                                                                                                                                                                                |                                                                                                           |                            |
|-----|-----------------|------------------------------------------------------------------------------------------------------------------------------------------------------------------------------------------------|-----------------------------------------------------------------------------------------------------------|----------------------------|
| 420 | vanderVeen 2000 | Basic income on the agenda: Policy objectives and political chances                                                                                                                            | Amsterdam: Amsterdam University Press; distributed by University of Michigan Press, Ann Arbor             | Incorrect study type       |
| 421 | Varner 2009     | Marital Transitions and Changes in African American Mothers' Depressive Symptoms: The Buffering Role of Financial Resources                                                                    | Journal of Family Psychology                                                                              | Incorrect exposure         |
| 422 | Varner 2009     | Marital Transitions and Changes in African American Mothers' Depressive Symptoms: The Buffering Role of Financial Resources: JFP JFP                                                           | Journal of Family Psychology                                                                              | Exact duplicate            |
| 423 | Vemuri 2011     | A Tale of Two Scales: Evaluating the Relationship Among Life Satisfaction, Social Capital, Income, and the Natural Environment at Individual and Neighborhood Levels in Metropolitan Baltimore | Environment and Behavior                                                                                  | Incorrect exposure         |
| 424 | Vendrik 2013    | Adaptation, anticipation and social interaction in happiness: An integrated error-correction approach                                                                                          | Journal of Public Economics                                                                               | Duplicate sample           |
| 425 | Vietch 1995     | Prescribing citizens advice: an evaluation of the work of the citizens advice bureau with Health and Social Services in Birmingham                                                             | Birmingham, District Citizens Advice Bureau                                                               | Unable to source full text |
| 426 | Vilches 2014    | POST-CATASTROPHE SOCIAL-ENVIRONMENTAL EFFECTS IN VULNERABLE COASTAL AREAS AFFECTED BY THE TSUNAMI OF 02/27/2010 IN CHILE                                                                       | Interciencia                                                                                              | Incorrect language         |
| 427 | Vinokur 1996    | Hard times and hurtful partners: How financial strain affects depression and relationship satisfaction of unemployed persons and their spouses                                                 | Journal of personality and social psychology                                                              | Incorrect exposure         |
| 428 | Vitturi 2018    | Social consequences and quality of life of patients with myasthenia gravis                                                                                                                     | Journal of Neuromuscular Diseases                                                                         | Incorrect study type       |
| 429 | Voss 2017       | Honest Labor Bears a Lovely Face: Will Late-Life Unemployment Impact Health and Satisfaction in Retirement?                                                                                    | Journal of Occupational & Environmental Medicine                                                          | Incorrect exposure         |
| 430 | Wahlbeck 2017   | Interventions to mitigate the effects of poverty and inequality on mental health                                                                                                               | Social Psychiatry & Psychiatric Epidemiology                                                              | Incorrect study type       |
| 431 | Wang 2019       | The short-term impact of unconditional cash transfers: a replication study of a randomized controlled trial in Kenya                                                                           | Journal of Development Effectiveness                                                                      | Duplicate sample           |
| 432 | Wang 2019       | Gains and losses: Does farmland acquisition harm farmers' welfare?                                                                                                                             | Land Use Policy                                                                                           | Incorrect exposure         |
| 433 | Waqas 2018      | Access to better health? The impact of the Benazir Income Support Programme in Pakistan                                                                                                        | Asia Pacific Journal of Public Administration                                                             | No relevant outcome(s)     |
| 434 | Wedcliffe 2001  | The psychological effects of traumatic brain injury on the quality of life of a group of spouses/partners                                                                                      | South African Journal of Communication Disorders - die Suid-Afrikaanse Tydskrif vir Kommunikasieafwykings | No relevant outcome(s)     |
| 435 | Weich 1998      | Poverty, unemployment, and common mental disorders: population based cohort study                                                                                                              | Bmj-British Medical Journal                                                                               | Incorrect exposure         |
| 436 | White 2018      | Two Year Sustainability of the Effect of a Financial Education Program on the Health and Wellbeing of Single, Low-Income Women                                                                 | Journal of Financial Counseling and Planning                                                              | No comparator group        |
| 437 | Wickham 2016    | Impact of moving into poverty on maternal and child mental health: Longitudinal analysis of the Millennium Cohort Study                                                                        | The Lancet                                                                                                | Exact duplicate            |
| 438 | Wilkinson 2016  | Financial Strain and Mental Health Among Older Adults During the Great Recession                                                                                                               | Journals of Gerontology Series B-Psychological Sciences & Social Sciences                                 | Incorrect population       |

|     |              |                                                                                                                                                                                  |                                                                       |                            |
|-----|--------------|----------------------------------------------------------------------------------------------------------------------------------------------------------------------------------|-----------------------------------------------------------------------|----------------------------|
| 439 | Wu 1996      | Marital disruption and change in mental health                                                                                                                                   | University of Nebraska                                                | Unable to source full text |
| 440 | Wu 2018      | Financial transfers from adult children and depressive symptoms among mid-aged and elderly residents in China - evidence from the China health and retirement longitudinal study | BMC Public Health                                                     | Incorrect exposure         |
| 441 | Yoon 2003    | Factors associated with family caregivers' burden and depression in Korea                                                                                                        | International Journal of Aging & Human Development                    | Incorrect population       |
| 442 | Young 2012   | Losing a Job: The Nonpecuniary Cost of Unemployment in the United States                                                                                                         | Social Forces                                                         | Duplicate sample           |
| 443 | Zavisca 2005 | Does Money Buy Happiness in Unhappy Russia?                                                                                                                                      | Institute of Slavic, East European, and Eurasian Studies, UC Berkeley | Duplicate sample           |
| 444 | Zhang 2007   | Wealth and health: What's the magnitude of effect of permanent income and transitory income on mental health?                                                                    | Journal of Mental Health Policy and Economics                         | Incorrect study type       |
| 445 | Ziersch 2014 | A longitudinal study of the mental health impacts of job loss: the role of socioeconomic, sociodemographic, and social capital factors                                           | Journal of Occupational & Environmental Medicine                      | Incorrect exposure         |
| 446 | Zvorsky 2018 | Effects of Financial Incentives for Smoking Cessation on Mood and Anxiety Symptoms Among Pregnant and Newly Postpartum Women                                                     | Nicotine & Tobacco Research                                           | No comparator group        |

## Appendix F: Additional tables

**Table F1: Results of meta-regression for all main analyses.** *Individual and fully adjusted models shown, results with  $p < 0.05$  in bold. Reference categories: Income source = unknown; Direction = no distinction; If earned = unearned; Conditionality = Yes; Size = includes both; SEP = mixed; Setting = High income country; Outcome measure = admin data; Poverty transition = no; Outcome type = life satisfaction*

| Model                                                          | Exposure variable                         | Coefficient (95% CI)        | p-value      |
|----------------------------------------------------------------|-------------------------------------------|-----------------------------|--------------|
| <i>Income increases and mental health outcomes (Figure 3A)</i> |                                           |                             |              |
| Income source                                                  | Lottery win                               | -0.08 (-0.28, 0.11)         | 0.410        |
| Income source                                                  | Tax/wage policy                           | 0.08 (-0.08, 0.23)          | 0.353        |
| Income source                                                  | Cash transfer (not welfare policy)        | -0.01 (-0.17, 0.15)         | 0.931        |
| Income source                                                  | Welfare policy (cash transfer only)       | 0.03 (-0.10, 0.16)          | 0.620        |
| Income source                                                  | <b>Other welfare policy</b>               | <b>0.18 (0.02, 0.34)</b>    | <b>0.025</b> |
| Direction                                                      | Increase only                             | 0.02 (-0.14, 0.18)          | 0.804        |
| If earned                                                      | Unearned income                           | -0.02 (-0.13, 0.10)         | 0.779        |
| Conditionality                                                 | Yes                                       | 0.04 (-0.08, 0.16)          | 0.500        |
| Size                                                           | Small change                              | 0.02 (-0.13, 0.17)          | 0.787        |
| Size                                                           | Large change                              | 0.03 (-0.09, 0.15)          | 0.614        |
| SEP                                                            | Low                                       | 0.08 (-0.01, 0.17)          | 0.080        |
| SEP                                                            | High                                      | -0.01 (-0.39, 0.38)         | 0.973        |
| Setting                                                        | Low/middle income                         | 0.07 (-0.02, 0.15)          | 0.146        |
| Outcome measure                                                | Clinical interview                        | 0.09 (-0.25, 0.43)          | 0.614        |
| Outcome measure                                                | Self report - survey Q                    | 0.07 (-0.22, 0.36)          | 0.630        |
| Outcome measure                                                | Self report - validated tool              | 0.08 (-0.17, 0.33)          | 0.543        |
| <b>Poverty transition</b>                                      | <b>Yes</b>                                | <b>0.11 (0.03, 0.19)</b>    | <b>0.005</b> |
| Adjusted                                                       | <b>Lottery win</b>                        | <b>0.56 (0.04, 1.08)</b>    | <b>0.036</b> |
| Adjusted                                                       | <b>Tax/wage policy</b>                    | <b>0.58 (0.12, 1.04)</b>    | <b>0.013</b> |
| Adjusted                                                       | <b>Cash transfer (not welfare policy)</b> | <b>0.54 (0.08, 0.99)</b>    | <b>0.020</b> |
| Adjusted                                                       | Welfare policy (cash transfer only)       | 0.40 (-0.07, 0.87)          | 0.098        |
| Adjusted                                                       | <b>Other welfare policy</b>               | <b>0.50 (0.02, 0.98)</b>    | <b>0.042</b> |
| Adjusted                                                       | Increase only                             | -0.08 (-0.34, 0.18)         | 0.532        |
| Adjusted                                                       | Unearned income                           | -0.22 (-0.45, 0.01)         | 0.061        |
| Adjusted                                                       | Conditionality                            | -0.01 (-0.18, 0.15)         | 0.872        |
| Adjusted                                                       | Small change                              | 0.21 (-0.05, 0.48)          | 0.110        |
| Adjusted                                                       | Large change                              | 0.03 (-0.18, 0.24)          | 0.787        |
| Adjusted                                                       | Low SEP                                   | -0.13 (-0.30, 0.03)         | 0.112        |
| Adjusted                                                       | High SEP                                  | -0.01 (-0.44, 0.41)         | 0.949        |
| Adjusted                                                       | Clinical interview                        | 0.36 (-0.05, 0.77)          | 0.082        |
| Adjusted                                                       | Self report - survey Q                    | 0.05 (-0.25, 0.34)          | 0.752        |
| Adjusted                                                       | Self report - validated tool              | 0.01 (-0.31, 0.33)          | 0.946        |
| Adjusted                                                       | <b>Yes (poverty transition)</b>           | <b>0.40 (0.14, 0.67)</b>    | <b>0.003</b> |
| <i>Income decreases and mental health outcomes (Figure 3B)</i> |                                           |                             |              |
| Income source                                                  | <b>Disaster</b>                           | <b>-0.48 (-0.88, -0.07)</b> | <b>0.023</b> |
| Income source                                                  | Salary change                             | 0.10 (-0.16, 0.36)          | 0.451        |



|                                                            |                                     |                             |              |
|------------------------------------------------------------|-------------------------------------|-----------------------------|--------------|
| Income source                                              | Welfare policy (cash transfer only) | 0.05 (-0.20, 0.31)          | 0.693        |
| If earned                                                  | Unearned income                     | 0.07 (-0.23, 0.37)          | 0.633        |
| Size                                                       | Large change                        | -0.08 (-0.27, 0.12)         | 0.439        |
| Setting                                                    | Low/middle income                   | 0.13 (-0.17, 0.42)          | 0.403        |
| Outcome measure                                            | Self report - survey Q              | 0.17 (-0.18, 0.52)          | 0.328        |
| Outcome measure                                            | Self report - validated tool        | 0.13 (-0.12, 0.38)          | 0.309        |
| Poverty transition                                         | Yes                                 | 0.14 (-0.06, 0.33)          | 0.166        |
| Adjusted                                                   | <b>Disaster</b>                     | <b>-0.51 (-0.93, -0.09)</b> | <b>0.018</b> |
| Adjusted                                                   | Salary change                       | 0.07 (-0.21, 0.34)          | 0.643        |
| Adjusted                                                   | Welfare policy (cash transfer only) | 0.24 (-0.08, 0.55)          | 0.138        |
| Adjusted                                                   | Large change                        | -0.11 (-0.35, 0.12)         | 0.335        |
| Adjusted                                                   | Self report - validated tool        | 0.11 (-0.13, 0.34)          | 0.384        |
| Adjusted                                                   | Yes (poverty transition)            | 0.07 (-0.16, 0.29)          | 0.568        |
| <i>Income increases and wellbeing outcomes (Figure 4A)</i> |                                     |                             |              |
| Income source                                              | Lottery win                         | -0.04 (-0.61, 0.53)         | 0.897        |
| Income source                                              | Tax/wage policy                     | -0.02 (-0.45, 0.41)         | 0.941        |
| Income source                                              | Cash transfer (not welfare policy)  | 0.60 (-0.12, 1.33)          | 0.100        |
| Income source                                              | Welfare policy (cash transfer only) | 0.33 (-0.01, 0.68)          | 0.059        |
| Income source                                              | Other welfare policy                | 0.09 (-0.32, 0.51)          | 0.655        |
| Direction                                                  | Increase only                       | 0.23 (-0.17, 0.63)          | 0.255        |
| If earned                                                  | Unearned income                     | 0.24 (-0.05, 0.53)          | 0.110        |
| Conditionality                                             | Yes                                 | 0.28 (-0.05, 0.61)          | 0.101        |
| Size                                                       | Small change                        | 0.11 (-0.26, 0.47)          | 0.557        |
| Size                                                       | Large change                        | 0.24 (-0.11, 0.58)          | 0.179        |
| SEP                                                        | Low                                 | 0.25 (-0.03, 0.52)          | 0.082        |
| SEP                                                        | High                                | 0.25 (-0.36, 0.86)          | 0.422        |
| Setting                                                    | Low/middle income                   | 0.20 (-0.05, 0.44)          | 0.111        |
| Outcome measure                                            | Self report - validated tool        | 0.17 (-0.29, 0.63)          | 0.465        |
| Poverty transition                                         | Yes                                 | 0.15 (-0.12, 0.41)          | 0.279        |
| Adjusted                                                   | Lottery win                         | -1.05 (-3.73, 1.64)         | 0.444        |
| Adjusted                                                   | Tax/wage policy                     | -0.60 (-2.88, 1.68)         | 0.607        |
| Adjusted                                                   | Cash transfer (not welfare policy)  | -0.85 (-4.38, 2.69)         | 0.638        |
| Adjusted                                                   | Welfare policy (cash transfer only) | -0.84 (-3.39, 1.71)         | 0.517        |
| Adjusted                                                   | Other welfare policy                | -1.06 (-3.63, 1.51)         | 0.420        |
| Adjusted                                                   | Increase only                       | 0.30 (-1.52, 2.12)          | 0.748        |
| Adjusted                                                   | Unearned income                     | 0.94 (-1.51, 3.40)          | 0.452        |
| Adjusted                                                   | Conditionality                      | 0.53 (-0.27, 1.32)          | 0.194        |
| Adjusted                                                   | Small change                        | -0.70 (-2.60, 1.21)         | 0.473        |
| Adjusted                                                   | Large change                        | -0.20 (-1.76, 1.37)         | 0.803        |
| Adjusted                                                   | Low SEP                             | 0.29 (-1.11, 1.68)          | 0.687        |
| Adjusted                                                   | High SEP                            | 0.07 (-1.97, 2.12)          | 0.944        |
| Adjusted                                                   | Happiness measure                   | -0.18 (-0.99, 0.63)         | 0.663        |
| Adjusted                                                   | Quality of life measure             | 0.43 (-1.12, 1.99)          | 0.584        |
| Adjusted                                                   | Self report - validated tool        | -0.31 (-1.32, 0.70)         | 0.551        |

**Table F2: GRADE summary of findings and certainty of evidence for each outcome domain**

| <b>Income changes and mental health/wellbeing outcomes</b>                            |                                                                                                                                                                                                          |                                                                |                              |                               |                                          |                                                                                                                                          |
|---------------------------------------------------------------------------------------|----------------------------------------------------------------------------------------------------------------------------------------------------------------------------------------------------------|----------------------------------------------------------------|------------------------------|-------------------------------|------------------------------------------|------------------------------------------------------------------------------------------------------------------------------------------|
| <b>Population/setting:</b> General population in low, middle and high-income settings |                                                                                                                                                                                                          |                                                                |                              |                               |                                          |                                                                                                                                          |
| <b>Intervention:</b> An income change from any source                                 |                                                                                                                                                                                                          |                                                                |                              |                               |                                          |                                                                                                                                          |
| <b>Comparison:</b> Not receiving an equivalent income change                          |                                                                                                                                                                                                          |                                                                |                              |                               |                                          |                                                                                                                                          |
| Outcomes                                                                              | Risk with no intervention                                                                                                                                                                                | Risk with intervention (95% CI)                                | Effect estimate (95% CI)     | No. of participants (studies) | Certainty of the evidence (GRADE)        | Comments                                                                                                                                 |
| <b>1. Income changes and grouped mental health outcomes e.g. CES-D (range 0-60)</b>   |                                                                                                                                                                                                          |                                                                |                              |                               |                                          |                                                                                                                                          |
| EFFECT DIRECTION                                                                      |                                                                                                                                                                                                          |                                                                |                              |                               |                                          |                                                                                                                                          |
| a) Any income change                                                                  | 88.9% of studies reported a beneficial effect of income changes on mental health (95% CI 77.4%, 95.8%) i.e., an increase was associated with improvement and/or a decrease was associated with worsening |                                                                |                              | 922,428 (54 studies)          | ⊕⊕⊖⊖<br><b>Low</b> <sup>a,b</sup>        | Downgraded for inconsistency and risk of bias<br><br>Income has a beneficial effect on mental health                                     |
| EFFECT SIZE                                                                           |                                                                                                                                                                                                          |                                                                |                              |                               |                                          |                                                                                                                                          |
| b) 10% income increase                                                                | Mean CES-D score 16.01 <sup>c</sup>                                                                                                                                                                      | Mean <b>0.03 pts higher</b> (0.0003 to 0.005 pts) <sup>d</sup> | Std. β 0.003 (0.0003, 0.005) | 1,510,666 (9 studies)         | ⊕⊕⊖⊖<br><b>Low</b> <sup>a,e</sup>        | Downgraded for inconsistency and risk of bias<br><br>10% income increases result in a very small improvement in mental health            |
| c) Crossing poverty/ subsistence threshold                                            | Mean CES-D score 16.01 <sup>c</sup>                                                                                                                                                                      | Mean <b>1.26 pts higher</b> (0.68 to 1.93 pts) <sup>d</sup>    | SMD 0.13 (0.07, 0.20)        | 42,128 (18 studies)           | ⊕⊕⊖⊖<br><b>Low</b> <sup>a,f,g</sup>      | Downgraded for inconsistency and indirectness<br><br>Moving individuals out of poverty results in a small improvement in mental health   |
| d) Income decrease (mixed amounts)                                                    | Mean CES-D score 16.01 <sup>c</sup>                                                                                                                                                                      | Mean <b>2.03 pts lower</b> (1.26 to 2.90 pts) <sup>d</sup>     | SMD -0.21 (-0.30, -0.13)     | 227,804 (11 studies)          | ⊕⊖⊖⊖<br><b>Very low</b> <sup>a,h,i</sup> | Downgraded for inconsistency, risk of bias and publication bias<br><br>Income decreases may result in a small worsening in mental health |

| 2. Income changes and grouped wellbeing outcomes e.g. life satisfaction (range 0-10)                                                                                                                                                                                                                                                                                                                                                                                                                                                                                                                                                                                                                                                            |                                                                                                                                                                                                      |                                                                |                             |                         |                                          |                                                                                                                                                 |
|-------------------------------------------------------------------------------------------------------------------------------------------------------------------------------------------------------------------------------------------------------------------------------------------------------------------------------------------------------------------------------------------------------------------------------------------------------------------------------------------------------------------------------------------------------------------------------------------------------------------------------------------------------------------------------------------------------------------------------------------------|------------------------------------------------------------------------------------------------------------------------------------------------------------------------------------------------------|----------------------------------------------------------------|-----------------------------|-------------------------|------------------------------------------|-------------------------------------------------------------------------------------------------------------------------------------------------|
| EFFECT DIRECTION                                                                                                                                                                                                                                                                                                                                                                                                                                                                                                                                                                                                                                                                                                                                |                                                                                                                                                                                                      |                                                                |                             |                         |                                          |                                                                                                                                                 |
| a) Any income change                                                                                                                                                                                                                                                                                                                                                                                                                                                                                                                                                                                                                                                                                                                            | 95.0% of studies reported a beneficial effect of income changes on wellbeing (95% CI 83.1%, 99.4%) i.e., an increase was associated with improvement and/or a decrease was associated with worsening |                                                                |                             | 311,219<br>(40 studies) | ⊕⊕⊖⊖<br><b>Low</b> <sup>a,b</sup>        | Downgraded for inconsistency and risk of bias<br><br>Income has a beneficial effect on wellbeing                                                |
| EFFECT SIZE                                                                                                                                                                                                                                                                                                                                                                                                                                                                                                                                                                                                                                                                                                                                     |                                                                                                                                                                                                      |                                                                |                             |                         |                                          |                                                                                                                                                 |
| b) 10% income increase                                                                                                                                                                                                                                                                                                                                                                                                                                                                                                                                                                                                                                                                                                                          | Mean life satisfaction score 7.36 <sup>i</sup>                                                                                                                                                       | Mean <b>0.005 pts higher</b> (0.003 to 0.009 pts) <sup>k</sup> | Std. β 0.003 (0.002, 0.005) | 105,326<br>(9 studies)  | ⊕⊖⊖⊖<br><b>Very low</b> <sup>a,e,i</sup> | Downgraded for inconsistency, risk of bias and publication bias<br><br>10% income increases may result in a very small improvement in wellbeing |
| c) Crossing poverty/ subsistence threshold                                                                                                                                                                                                                                                                                                                                                                                                                                                                                                                                                                                                                                                                                                      | Mean life satisfaction score 7.36 <sup>i</sup>                                                                                                                                                       | Mean <b>0.65 pts higher</b> (0.15 to 1.14 pts) <sup>k</sup>    | SMD 0.38 (0.09, 0.66)       | 101,350<br>(8 studies)  | ⊕⊕⊖⊖<br><b>Low</b> <sup>a,l,m</sup>      | Downgraded for inconsistency and risk of bias<br><br>Moving individuals out of poverty results in a moderate improvement in wellbeing           |
| d) Income decrease (mixed amounts)                                                                                                                                                                                                                                                                                                                                                                                                                                                                                                                                                                                                                                                                                                              |                                                                                                                                                                                                      |                                                                |                             |                         |                                          | Insufficient evidence                                                                                                                           |
| 3. Changes in unearned income and mental health/wellbeing outcomes                                                                                                                                                                                                                                                                                                                                                                                                                                                                                                                                                                                                                                                                              |                                                                                                                                                                                                      |                                                                |                             |                         |                                          |                                                                                                                                                 |
| Any                                                                                                                                                                                                                                                                                                                                                                                                                                                                                                                                                                                                                                                                                                                                             |                                                                                                                                                                                                      |                                                                |                             |                         |                                          | Insufficient evidence <sup>n</sup>                                                                                                              |
| <b>GRADE Working Group grades of evidence</b><br><b>High certainty</b> ⊕⊕⊕⊕: We are very confident that the true effect lies close to that of the estimate of the effect<br><b>Moderate certainty</b> ⊕⊕⊕⊖: We are moderately confident in the effect estimate: The true effect is likely to be close to the estimate of the effect, but there is a possibility that it is substantially different<br><b>Low certainty</b> ⊕⊕⊖⊖: Our confidence in the effect estimate is limited: The true effect may be substantially different from the estimate of the effect<br><b>Very low certainty</b> ⊕⊖⊖⊖: We have very little confidence in the effect estimate: The true effect is likely to be substantially different from the estimate of effect |                                                                                                                                                                                                      |                                                                |                             |                         |                                          |                                                                                                                                                 |

#### Explanations

- a) Downgraded for serious inconsistency as heterogeneity of included studies was considerable ( $I^2 > 75\%$  in meta-analyses)
- b) Downgraded for RoB as though critical RoB studies were excluded, most included studies were of serious RoB
- c) Based on  $n=7$  included studies which reported mean CES-D scores in control groups (the most commonly reported mental health outcome)
- d) Based on  $n=6$  included studies which reported SD of CES-D scores (9.67)
- e) Downgraded for RoB as all but one included studies were rated serious RoB
- f) Downgraded for serious indirectness: half of the 18 studies ( $n=9$ ) have either conditionality attached to the cash transfers or an important co-intervention, where it is therefore unclear to what degree the associated factors (e.g. school attendance, engagement with healthcare or training) contributed to the change in outcome
- g) **Not** downgraded for RoB as most included studies were RCTs, majority of studies were rated low/moderate RoB, and no difference in effect size in serious RoB studies on stratification
- h) Downgraded for RoB given most studies were rated serious RoB and stratified analyses indicate differing effect sizes for serious vs low/moderate RoB studies
- i) Downgraded for suspected publication bias given impression from funnel plot
- j) Based on  $n=4$  included studies which reported mean self-rated life satisfaction on 11 point scale in control groups (the most commonly reported wellbeing outcome)
- k) Based on  $n=6$  included studies which reported SD of self-rated life satisfaction on 11 point scale (1.72)
- l) Downgraded for RoB as though majority of included studies are low/moderate RoB, the two contributing serious RoB studies report notably larger effect sizes
- m) **Not** downgraded for indirectness as only a quarter of the 8 included studies ( $n=2$ ) have an important co-intervention or conditionality
- n) Robust stratified analyses directly comparing earned and unearned income sources were not possible, as individual meta-analyses included either almost exclusively unearned income changes or a combination of earned and unknown sources; readers should note that the vast majority of studies contributing to outcomes 1c) and 2c) were interventions on unearned income

## Appendix G: Additional graphs

### Effect direction plots

**Figure G1: Effect direction plot for all studies reporting the relationship between income changes and mental health outcomes, stratified by risk of bias (n=90)**

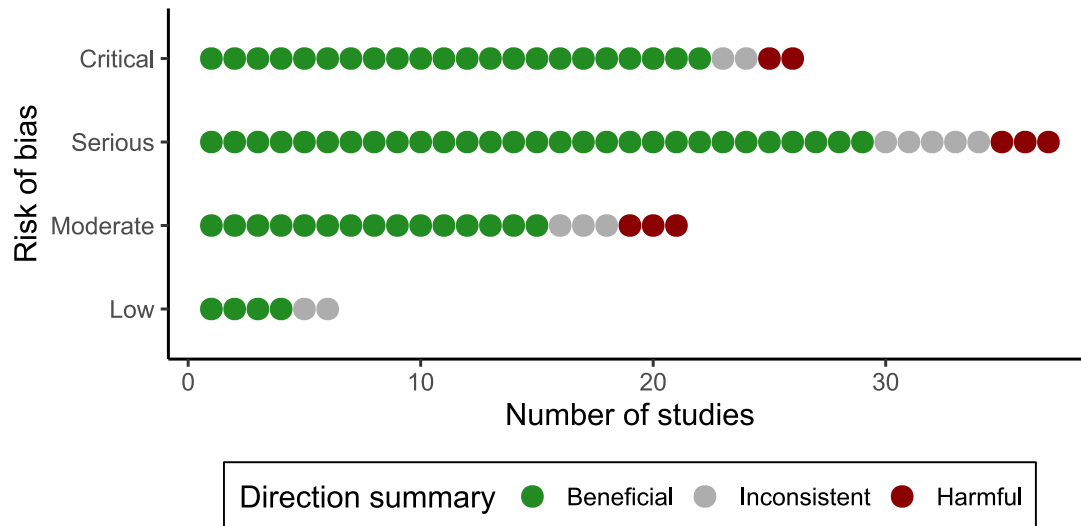

A beneficial effect direction indicates either that an income increase was associated with an improvement in outcome or that an income decrease was associated with a worsening in outcome. A harmful effect direction indicates the opposite relationship. An inconsistent rating indicates that <70% of extracted datapoints for the study reported a consistent effect direction.

**Figure G2: Effect direction plot for all studies reporting the relationship between income changes and wellbeing outcomes, stratified by risk of bias (n=64)**

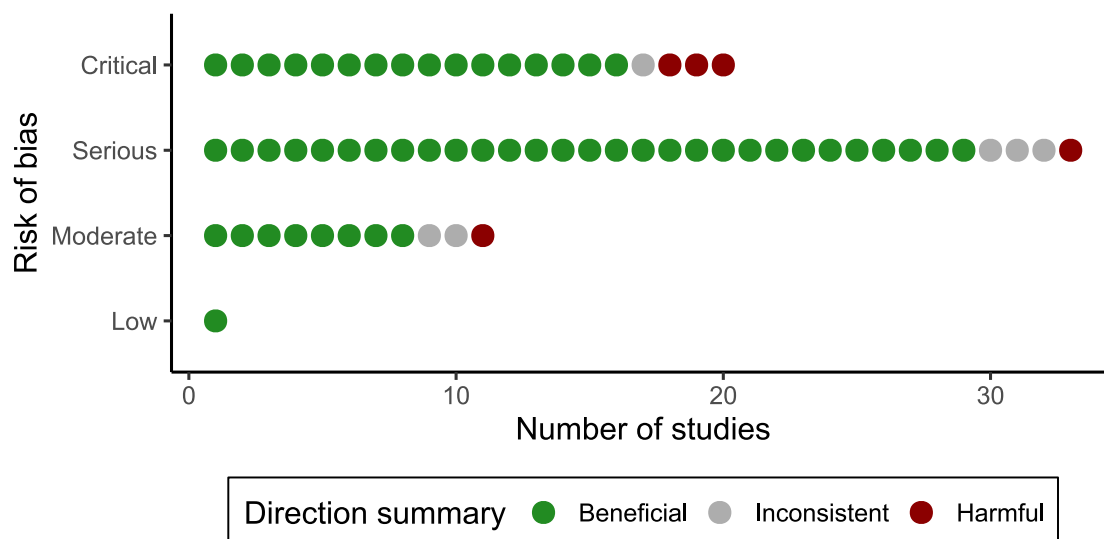

A beneficial effect direction indicates either that an income increase was associated with an improvement in outcome or that an income decrease was associated with a worsening in outcome. A harmful effect direction indicates the opposite relationship. An inconsistent rating indicates that <70% of extracted datapoints for the study reported a consistent effect direction.

## Stratified forest plots for main subgroup analysis

Figure G3: Forest plot for meta-analysis of studies reporting the effect of a binary income increase on a mental health outcome, stratified by sex

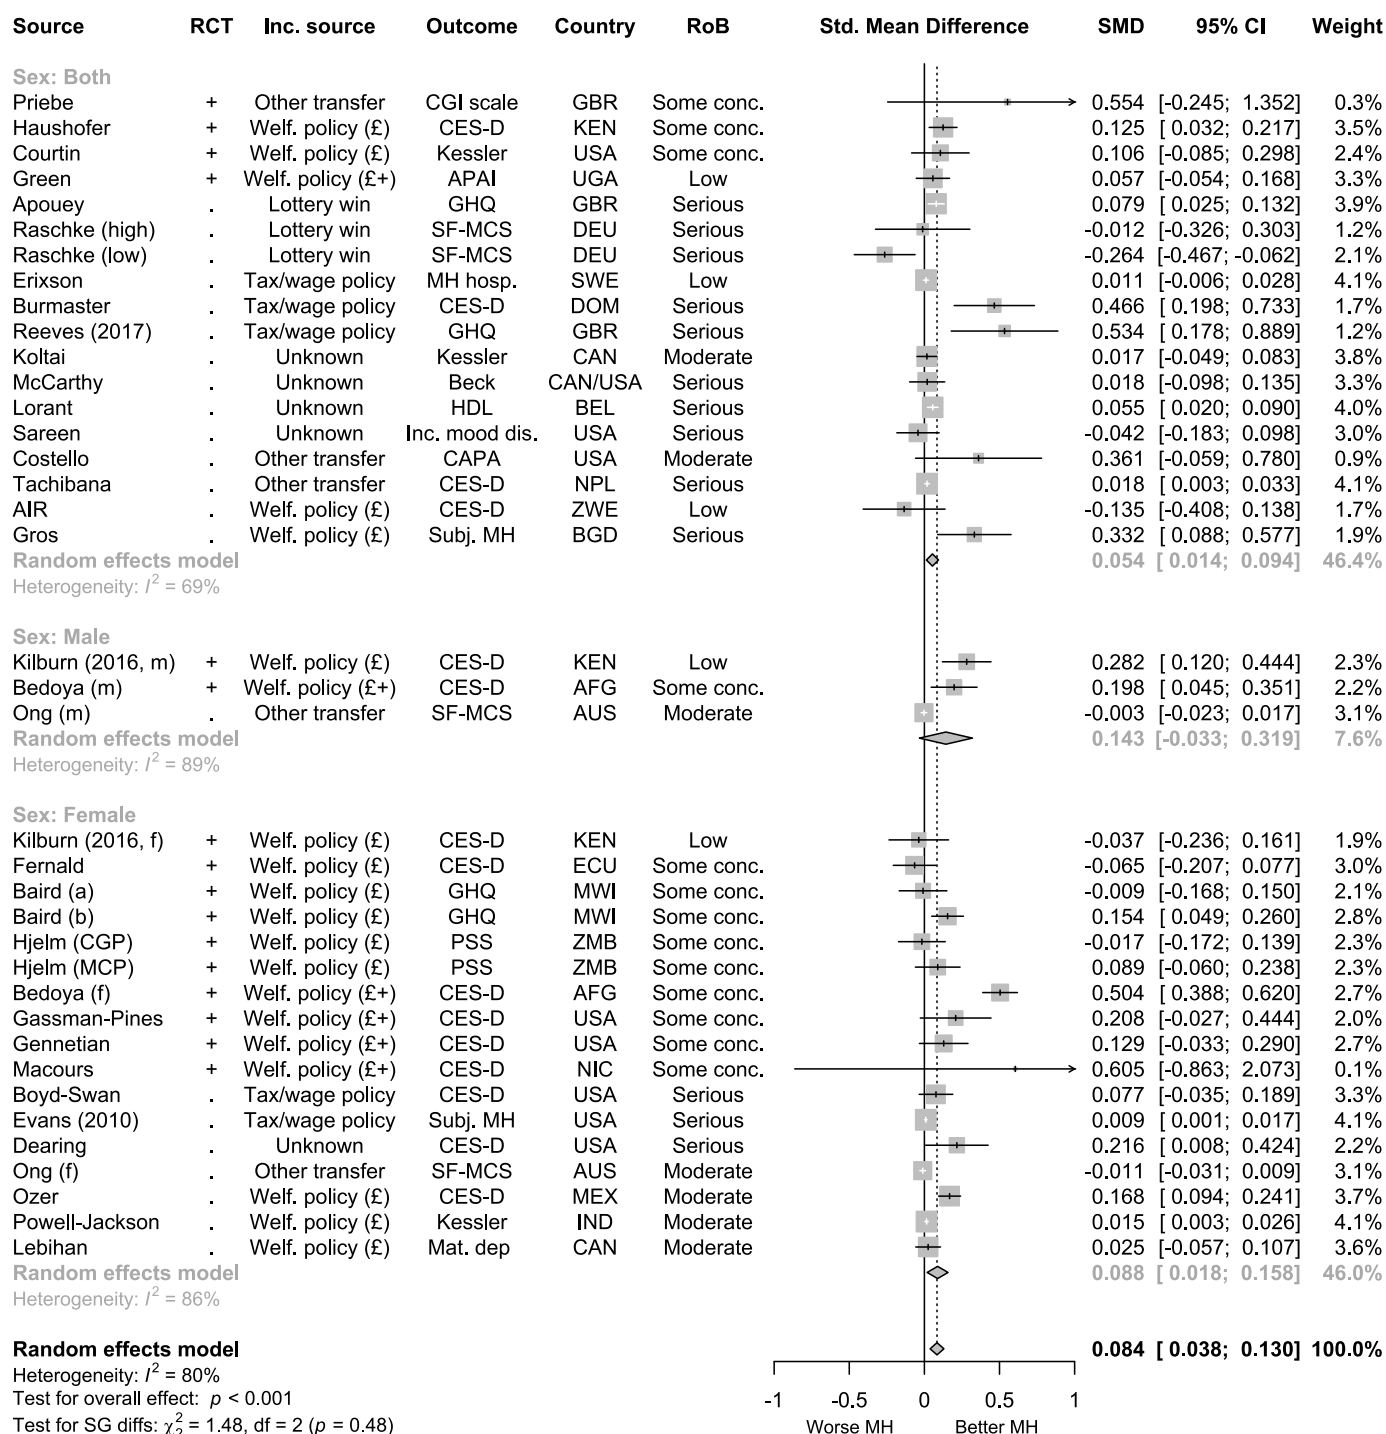

Number of people = 258,637; number of observations = 1,756,078. Studies sorted by RCT/NRS status → income source → outcome → RoB. + indicates study was a randomised controlled trial. (£) indicates a welfare policy which only affected income; (£+) indicates a welfare policy which also influenced other factors. (f) and (m) indicate studies which stratified results by sex; (high) and (low) indicate Raschke et al. stratified results by educational attainment. Baird (a) reported on a cash transfer to school dropouts versus Baird (b) which reported on a cash transfer to girls still enrolled in school; Hjelm (CGP) reported on the Zambia Child Grant Program versus Hjelm (MCP) which reported on the Zambia Multiple Category Cash Transfer Program. RoB = Risk of Bias score; SG = subgroup. APAI = Acholi Psychosocial Assessment Instrument. Beck = Beck depression inventory. CAPA = Child and Adolescent Psychiatric Assessment. CES-D = Center for Epidemiological Studies-Depression scale. CGI = Clinical Global Impression scale. GHQ = General Health Questionnaire. HDL = Health and Daily Living

Form. Inc. mood dis. = Incident mood disorder (assessed at clinical interview). Kessler = Kessler Psychological Distress scale. Mat. dep = measure of maternal depression. MH hosp. = mental health hospitalisations. PSS = Perceived Stress Scale. SF-MCS = Mental Component Summary of Short Form Survey. Subj. MH = measure of subjective/self-assessed mental health.

**Figure G4: Forest plot for meta-analysis of studies reporting the effect of a binary income increase on a mental health outcome, stratified by study design**

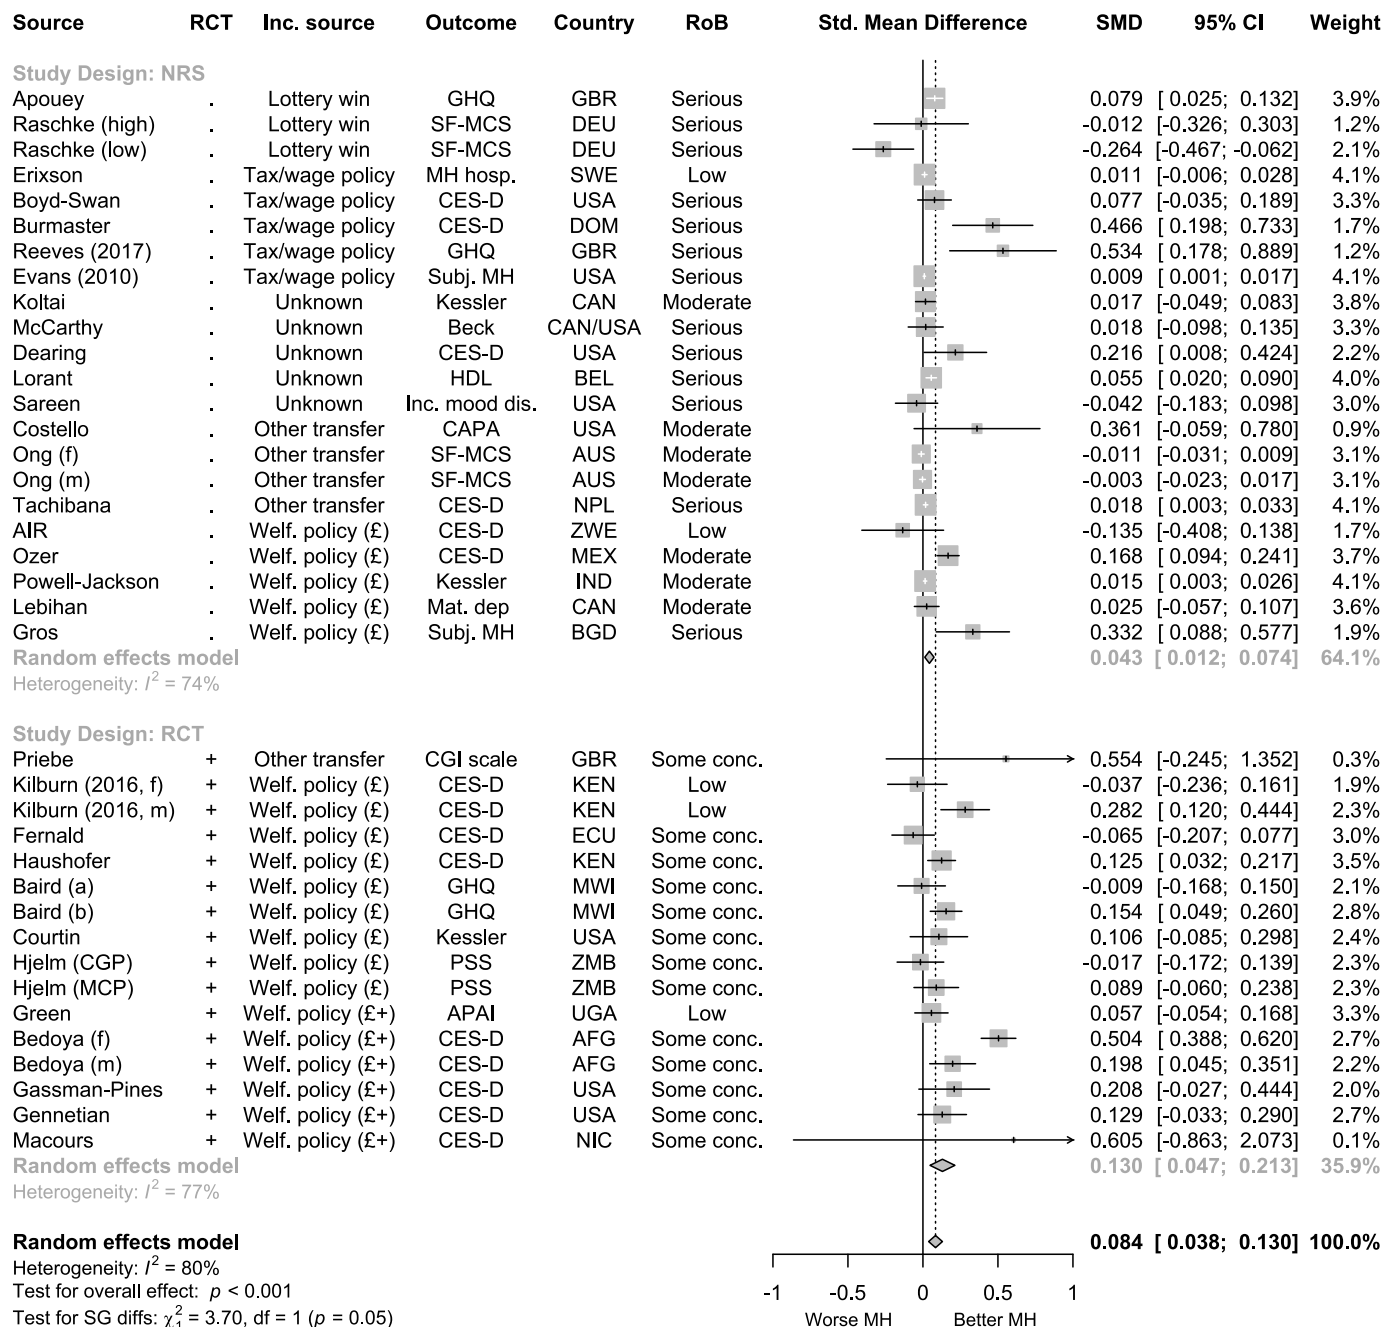

Number of people = 258,637; number of observations = 1,756,078. Studies sorted by RCT/NRS status → income source → outcome → RoB. + indicates study was a randomised controlled trial. (£) indicates a welfare policy which only affected income; (£+) indicates a welfare policy which also influenced other factors. (f) and (m) indicate studies which stratified results by sex; (high) and (low) indicate Raschke et al. stratified results by educational attainment. Baird (a) reported on a cash transfer to school dropouts versus Baird (b) which reported on a cash transfer to girls still enrolled in school; Hjelm (CGP) reported on the Zambia Child Grant Program versus Hjelm (MCP) which reported on the Zambia Multiple Category Cash Transfer Program. RoB = Risk of Bias score; SG = subgroup. APAI = Acholi Psychosocial Assessment Instrument. Beck = Beck Depression Inventory. CAPA = Child and Adolescent Psychiatric Assessment. CES-D = Center for Epidemiological Studies Depression scale. CGI = Clinical Global Impression scale. GHQ = General Health Questionnaire. HDL = Health and Daily Living Form. Inc. mood dis. = Incident mood disorder (assessed at clinical interview). Kessler = Kessler Psychological Distress scale.



Mat. dep = measure of maternal depression. MH hosp. = mental health hospitalisations. PSS = Perceived Stress Scale. SF-MCS = Mental Component Summary of Short Form Survey. Subj. MH = measure of subjective/self-assessed mental health.

**Figure G5: Forest plot for meta-analysis of studies reporting the effect of a binary income increase on a mental health outcome, stratified by risk of bias**

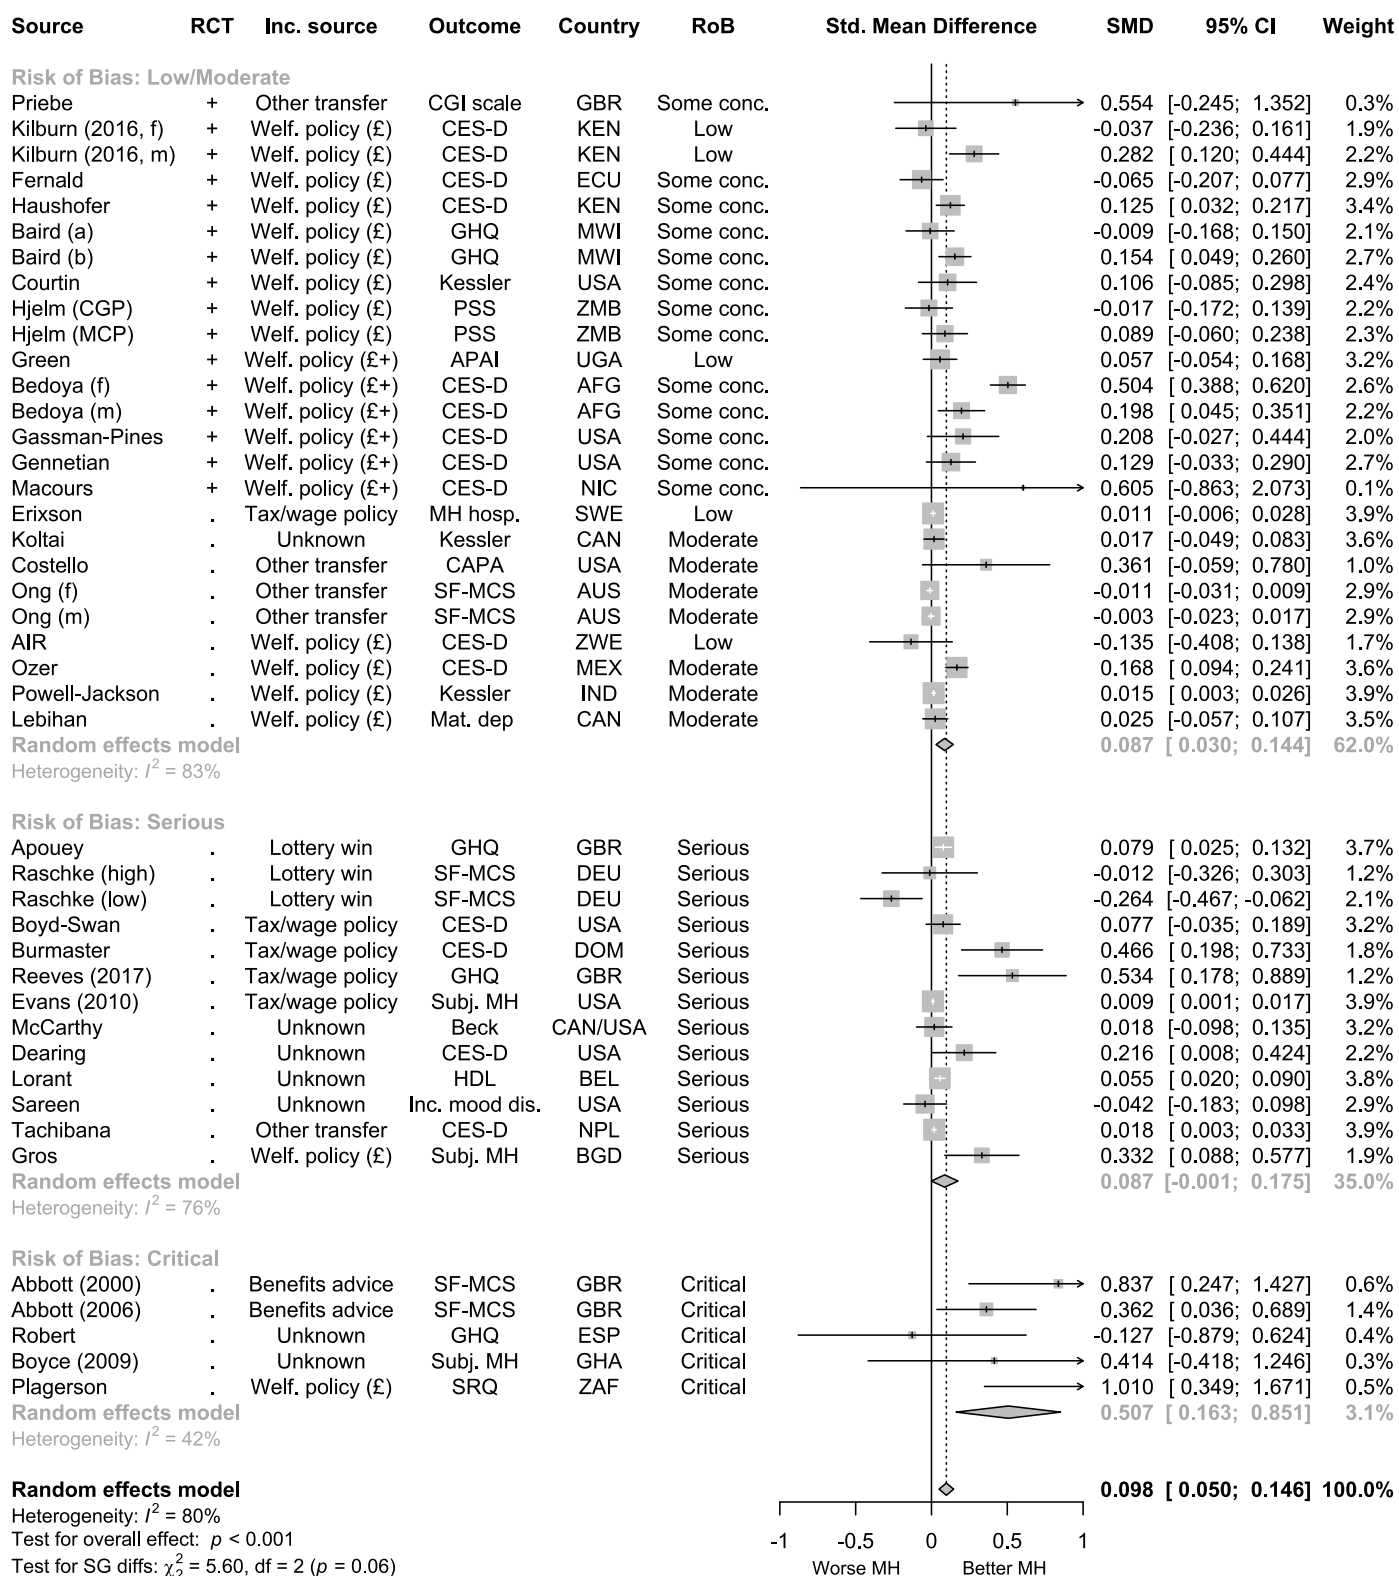

Number of people = 259,412; number of observations = 1,756,853. Studies sorted by RCT/NRS status → income source → outcome → RoB. + indicates study was a randomised controlled trial. (£) indicates a welfare policy which only affected income; (£+) indicates a welfare policy which also influenced other factors. (f) and (m) indicate studies which stratified



results by sex; (high) and (low) indicate Raschke et al. stratified results by educational attainment. Baird (a) reported on a cash transfer to school dropouts versus Baird (b) which reported on a cash transfer to girls still enrolled in school; Hjelm (CGP) reported on the Zambia Child Grant Program versus Hjelm (MCP) which reported on the Zambia Multiple Category Cash Transfer Program. RoB = Risk of Bias score; SG = subgroup. APAI = Acholi Psychosocial Assessment Instrument. Beck = Beck depression inventory. CAPA = Child and Adolescent Psychiatric Assessment. CES-D = Center for Epidemiological Studies-Depression scale. CGI = Clinical Global Impression scale. GHQ = General Health Questionnaire. HDL = Health and Daily Living Form. Inc. mood dis. = Incident mood disorder (assessed at clinical interview). Kessler = Kessler Psychological Distress scale. Mat. dep = measure of maternal depression. MH hosp. = mental health hospitalisations. PSS = Perceived Stress Scale. SF-MCS = Mental Component Summary of Short Form Survey. SRQ = Self-Reporting Questionnaire. Subj. MH = measure of subjective/self-assessed mental health.

**Figure G6: Forest plot for meta-analysis of studies reporting the effect of a binary income increase on a mental health outcome, stratified by whether increase likely to move individual out of poverty**

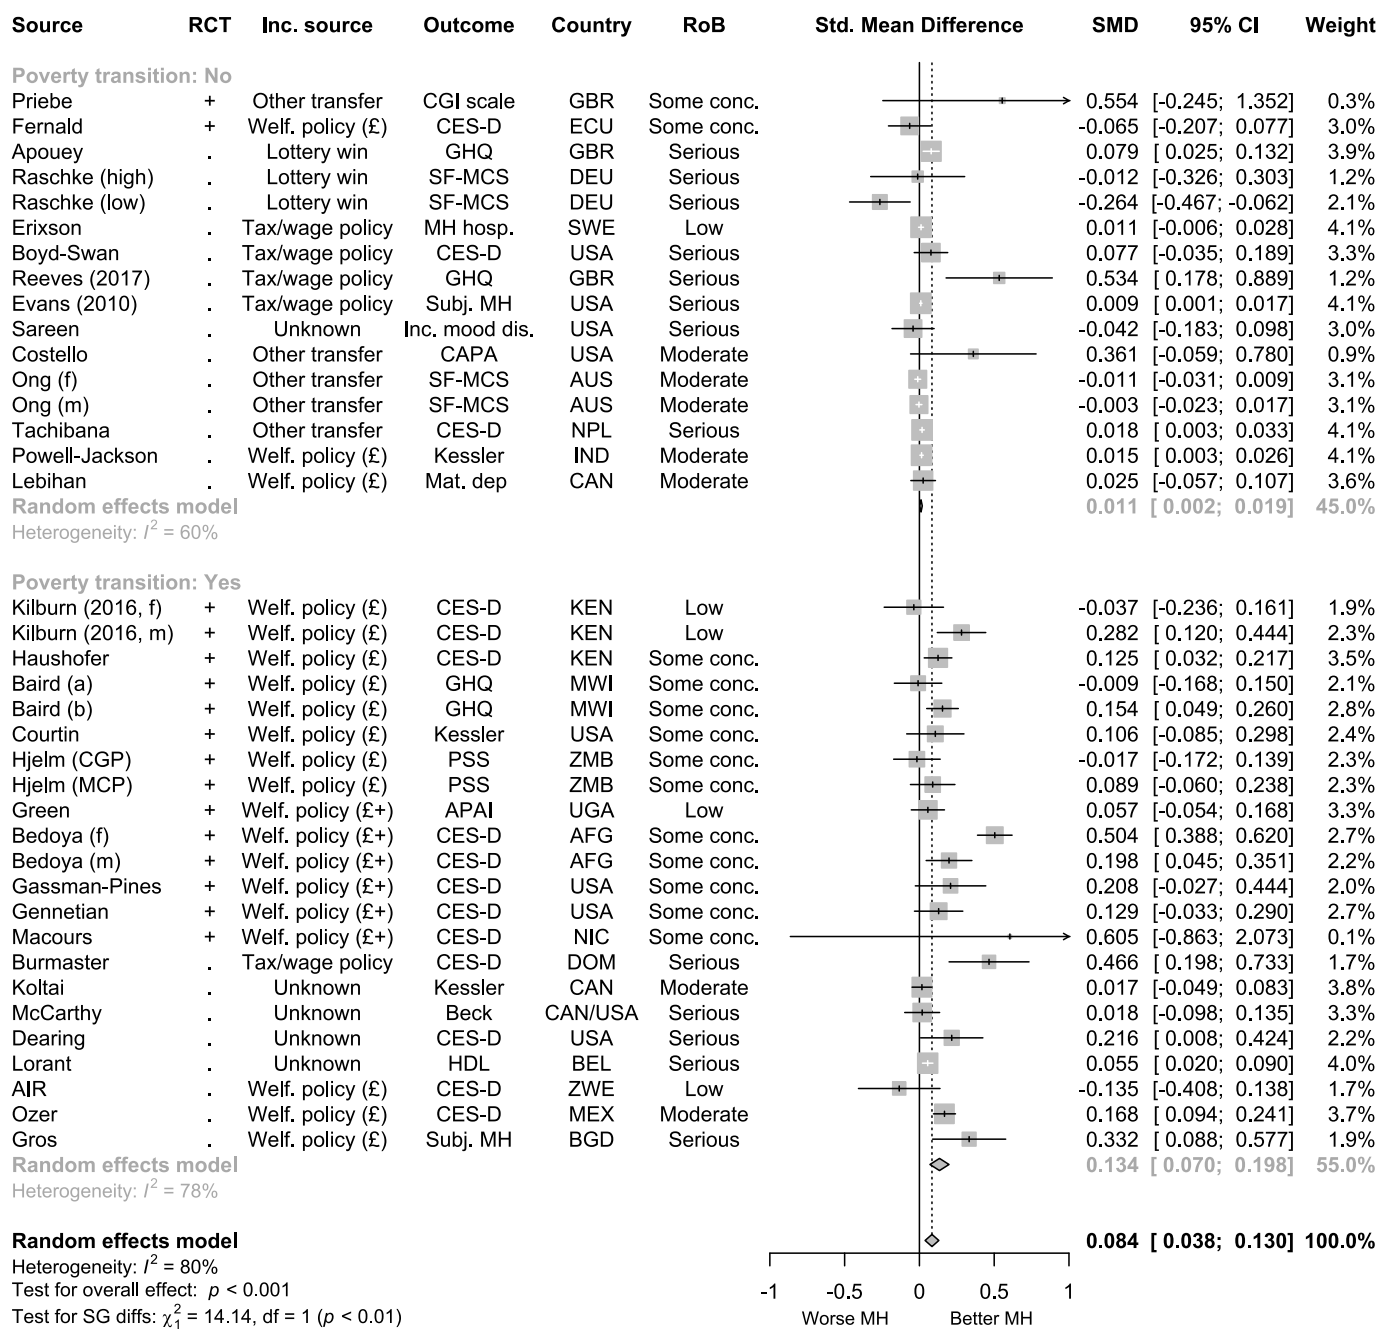

Number of people = 258,637; number of observations = 1,756,078. Studies sorted by RCT/NRS status → income source → outcome → RoB. + indicates study was a randomised controlled trial. (£) indicates a welfare policy which only affected income; (£+) indicates a welfare policy which also influenced other factors. (f) and (m) indicate studies which stratified results by sex; (high) and (low) indicate Raschke et al. stratified results by educational attainment. Baird (a) reported on a cash transfer to school dropouts versus Baird (b) which reported on a cash transfer to girls still enrolled in school; Hjelm (CGP) reported on the Zambia Child Grant Program versus Hjelm (MCP) which reported on the Zambia Multiple Category Cash Transfer Program. RoB = Risk of Bias score; SG = subgroup. APAI = Acholi Psychosocial Assessment Instrument. Beck = Beck depression inventory. CAPA = Child and Adolescent Psychiatric Assessment. CES-D = Center for Epidemiological Studies-Depression scale. CGI = Clinical Global Impression scale. GHQ = General Health Questionnaire. HDL = Health and Daily Living Form. Inc. mood dis. = Incident mood disorder (assessed at clinical interview). Kessler = Kessler Psychological Distress scale. Mat. dep = measure of maternal depression. MH hosp. = mental health hospitalisations. PSS = Perceived Stress Scale. SF-MCS = Mental Component Summary of Short Form Survey. Subj. MH = measure of subjective/self-assessed mental health.

**Figure G7: Forest plot for meta-analysis of studies reporting the effect of a binary income increase on a mental health outcome, stratified by socioeconomic position**

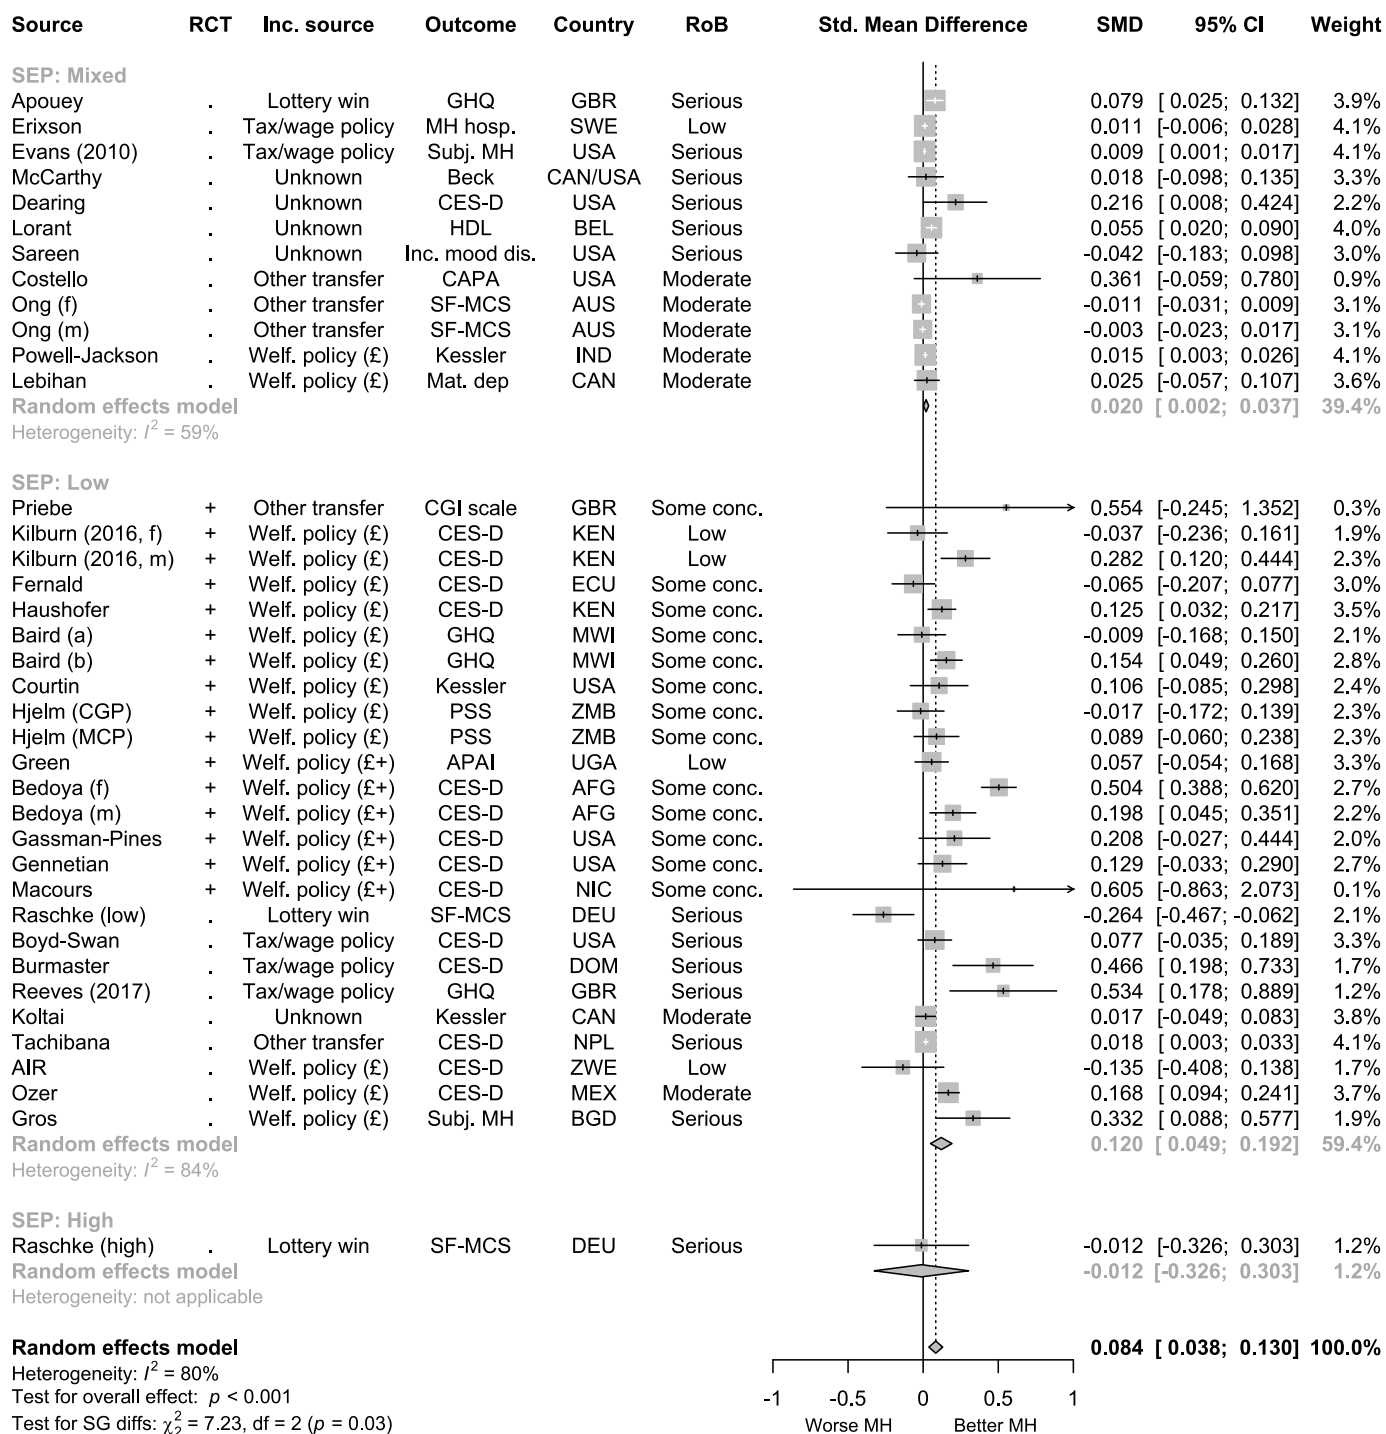

Number of people = 258,637; number of observations = 1,756,078. Studies sorted by RCT/NRS status → income source → outcome → RoB. + indicates study was a randomised controlled trial. (£) indicates a welfare policy which only affected income; (£+) indicates a welfare policy which also influenced other factors. (f) and (m) indicate studies which stratified results by sex; (high) and (low) indicate Raschke et al. stratified results by educational attainment. Baird (a) reported on a cash transfer to school dropouts versus Baird (b) which reported on a cash transfer to girls still enrolled in school; Hjelm (CGP) reported on the Zambia Child Grant Program versus Hjelm (MCP) which reported on the Zambia Multiple Category Cash Transfer Program. RoB = Risk of Bias score; SG = subgroup. APAI = Acholi Psychosocial Assessment Instrument. Beck = Beck depression inventory. CAPA = Child and Adolescent Psychiatric Assessment. CES-D = Center for Epidemiological Studies-Depression scale. CGI = Clinical Global Impression scale. GHQ = General Health Questionnaire. HDL = Health and Daily Living Form. Inc. mood dis. = Incident mood disorder (assessed at clinical interview). Kessler = Kessler Psychological Distress scale.

Mat. dep = measure of maternal depression. MH hosp. = mental health hospitalisations. PSS = Perceived Stress Scale. SF-MCS = Mental Component Summary of Short Form Survey. Subj. MH = measure of subjective/self-assessed mental health.

**Figure G8: Forest plot for meta-analysis of studies reporting the effect of a binary income increase on a mental health outcome, stratified by setting**

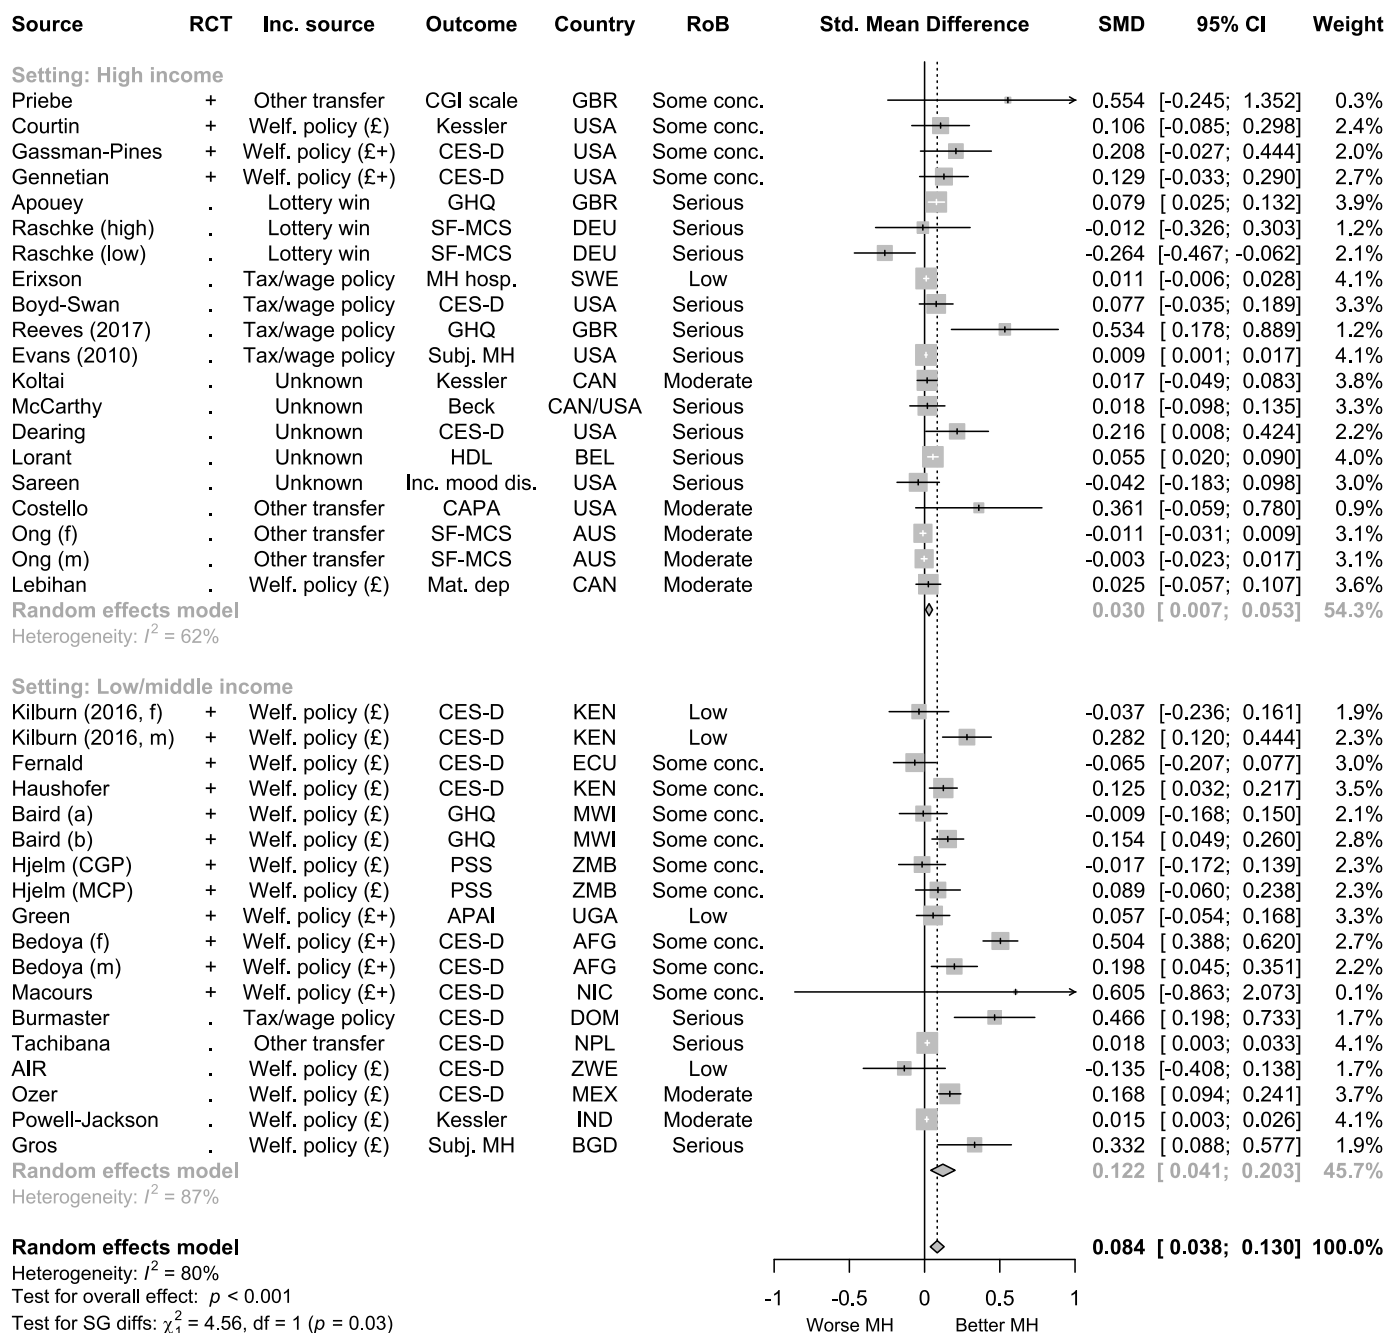

Number of people = 258,637; number of observations = 1,756,078. Studies sorted by RCT/NRS status → income source → outcome → RoB. + indicates study was a randomised controlled trial. (£) indicates a welfare policy which only affected income; (£+) indicates a welfare policy which also influenced other factors. (f) and (m) indicate studies which stratified results by sex; (high) and (low) indicate Raschke et al. stratified results by educational attainment. Baird (a) reported on a cash transfer to school dropouts versus Baird (b) which reported on a cash transfer to girls still enrolled in school; Hjelm (CGP) reported on the Zambia Child Grant Program versus Hjelm (MCP) which reported on the Zambia Multiple Category Cash Transfer Program. RoB = Risk of Bias score; SG = subgroup. APAI = Acholi Psychosocial Assessment Instrument. Beck = Beck depression inventory. CAPA = Child and Adolescent Psychiatric Assessment. CES-D = Center for Epidemiological Studies-Depression scale. CGI = Clinical Global Impression scale. GHQ = General Health Questionnaire. HDL = Health and Daily Living Form. Inc. mood dis. = Incident mood disorder (assessed at clinical interview). Kessler = Kessler Psychological Distress scale.

Mat. dep = measure of maternal depression. MH hosp. = mental health hospitalisations. PSS = Perceived Stress Scale. SF-MCS = Mental Component Summary of Short Form Survey. Subj. MH = measure of subjective/self-assessed mental health.

**Figure G9: Forest plot for meta-analysis of studies reporting the effect of a binary income increase on a mental health outcome, stratified by age**

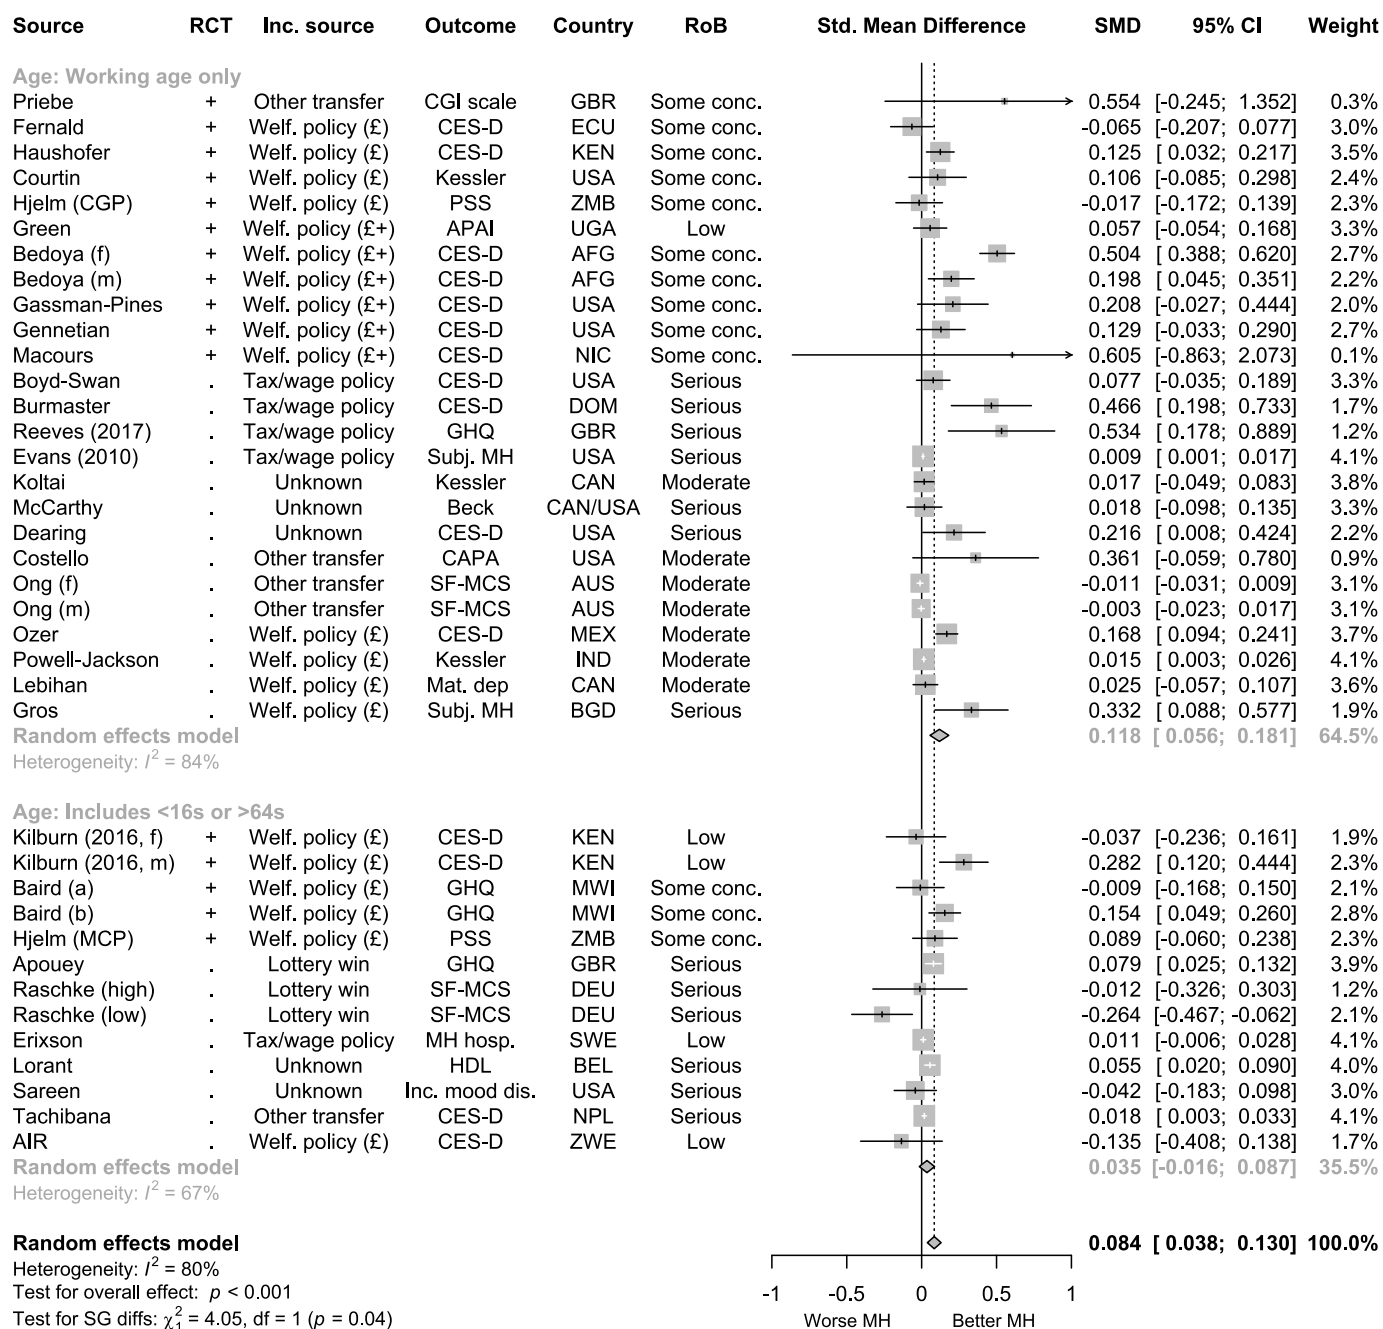

Number of people = 258,637; number of observations = 1,756,078. Studies sorted by RCT/NRS status → income source → outcome → RoB. + indicates study was a randomised controlled trial. (£) indicates a welfare policy which only affected income; (£+) indicates a welfare policy which also influenced other factors. (f) and (m) indicate studies which stratified results by sex; (high) and (low) indicate Raschke et al. stratified results by educational attainment. Baird (a) reported on a cash transfer to school dropouts versus Baird (b) which reported on a cash transfer to girls still enrolled in school; Hjelm (CGP) reported on the Zambia Child Grant Program versus Hjelm (MCP) which reported on the Zambia Multiple Category Cash Transfer Program. RoB = Risk of Bias score; SG = subgroup. APAI = Acholi Psychosocial Assessment Instrument. Beck = Beck depression inventory. CAPA = Child and Adolescent Psychiatric Assessment. CES-D = Center for Epidemiological Studies-Depression scale. CGI = Clinical Global Impression scale. GHQ = General Health Questionnaire. HDL = Health and Daily Living Form. Inc. mood dis. = Incident mood disorder (assessed at clinical interview). Kessler = Kessler Psychological Distress scale.

Mat. dep = measure of maternal depression. MH hosp. = mental health hospitalisations. PSS = Perceived Stress Scale. SF-MCS = Mental Component Summary of Short Form Survey. Subj. MH = measure of subjective/self-assessed mental health.

**Figure G10: Forest plot for meta-analysis of studies reporting the effect of a binary income decrease on a mental health outcome, stratified by sex**

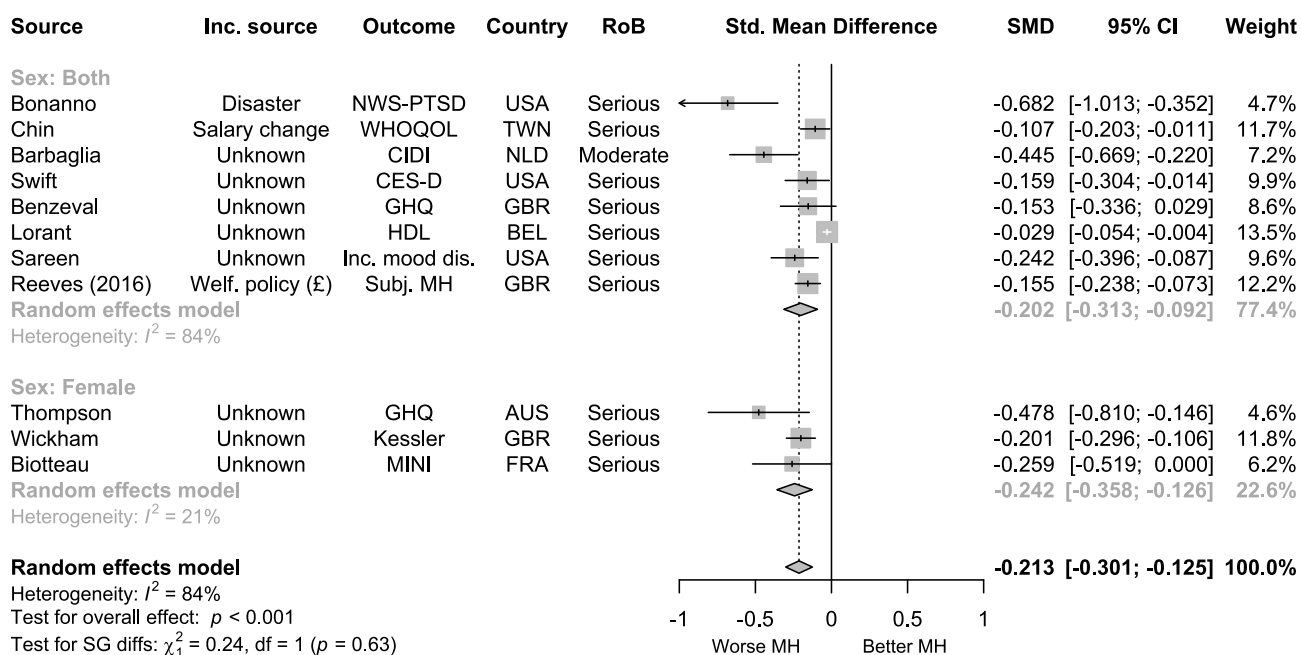

Number of people = 227,804; number of observations = 281,728. Studies sorted by income source → outcome → RoB. (£) indicates a welfare policy which only affected income. RoB = Risk of Bias score; SG = subgroup. CES-D = Center for Epidemiological Studies-Depression scale. CIDI = Composite International Diagnostic Interview. GHQ = General Health Questionnaire. HDL = Health and Daily Living Form. Inc. mood dis. = Incident mood disorder (assessed at clinical interview). Kessler = Kessler Psychological Distress scale. MINI = Mini International Neuropsychiatric Interview. NWS-PTSD = National Women's Study PTSD module. Subj. MH = measure of subjective/self-assessed mental health. WHOQOL = Psychological domain of abbreviated World Health Organisation Quality of Life tool



**Figure G11: Forest plot for meta-analysis of studies reporting the effect of a binary income decrease on a mental health outcome, stratified by risk of bias**

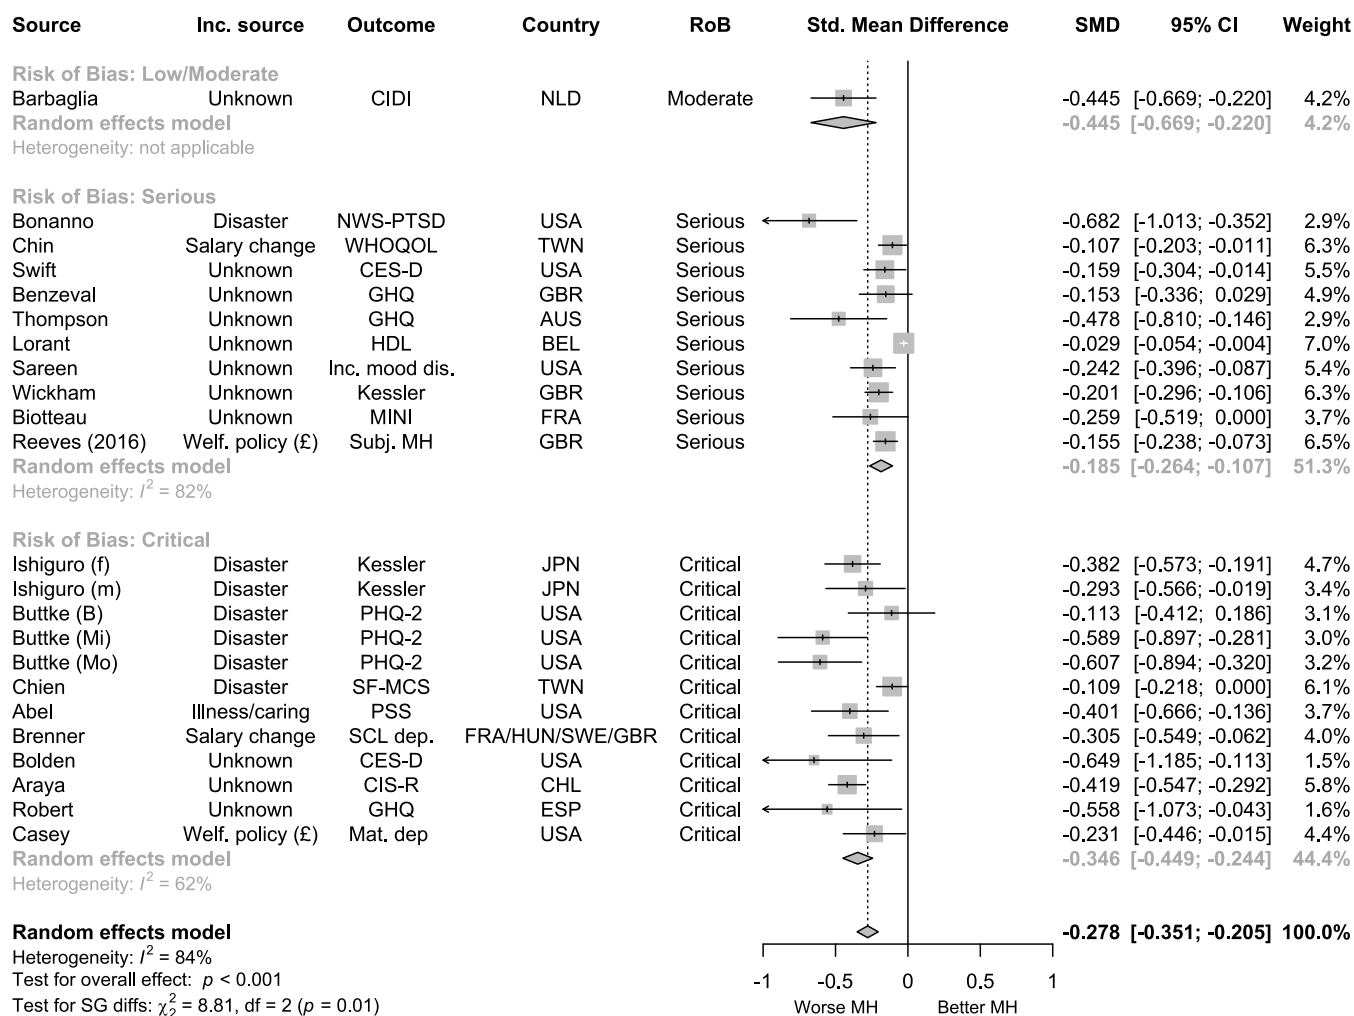

Number of people = 235,154; number of observations = 289,078. Studies sorted by income source → outcome → RoB. (£) indicates a welfare policy which only affected income. RoB = Risk of Bias score; SG = subgroup. CES-D = Center for Epidemiological Studies-Depression scale. CIDI = Composite International Diagnostic Interview. CIS-R = Revised Clinical Interview Schedule. GHQ = General Health Questionnaire. HDL = Health and Daily Living Form. Inc. mood dis. = Incident mood disorder (assessed at clinical interview). Kessler = Kessler Psychological Distress scale. Mat. dep = measure of maternal depression. MINI = Mini International Neuropsychiatric Interview. NWS-PTSD = National Women's Study PTSD module. PHQ-2 = Patient Health Questionnaire-2. PSS = Perceived Stress Scale. SCL dep. = Symptom Checklist 90-Revised, depression subscale. SF-MCS = Mental Component Summary of Short Form Survey. Subj. MH = measure of subjective/self-assessed mental health. WHOQOL = Psychological domain of abbreviated World Health Organisation Quality of Life tool

**Figure G12: Forest plot for meta-analysis of studies reporting the effect of a binary income decrease on a mental health outcome, stratified by age**

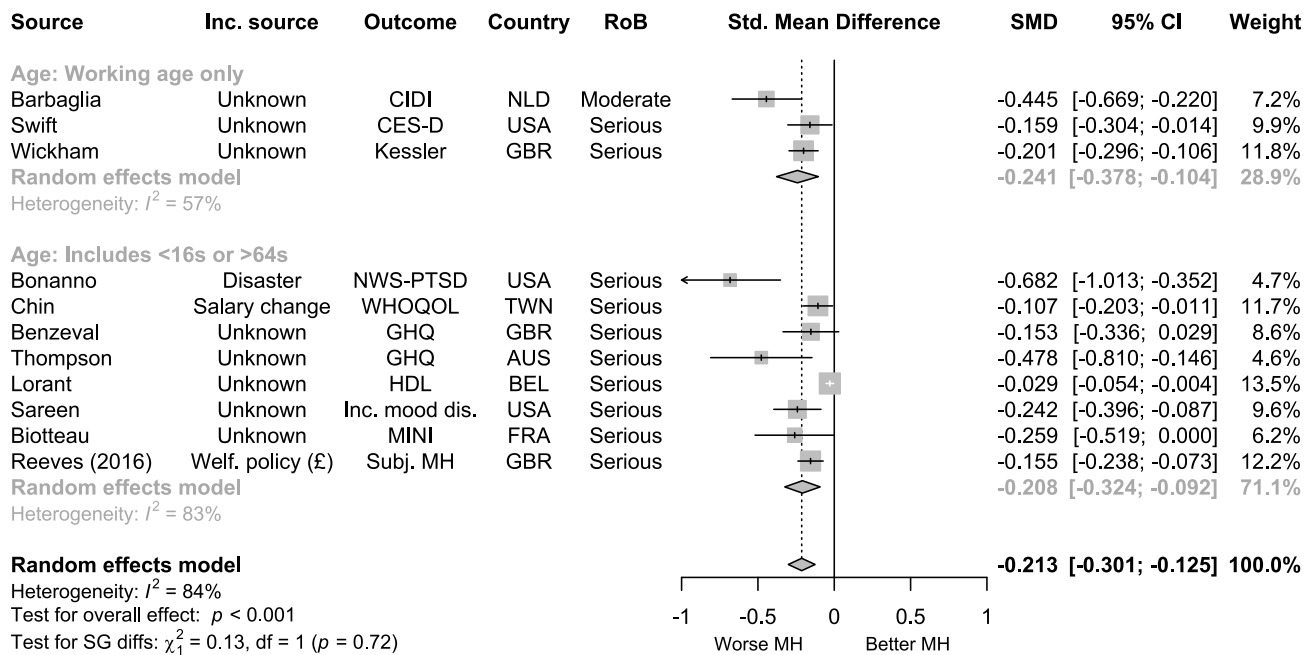

Number of people = 227,804; number of observations = 281,728. Studies sorted by income source → outcome → RoB. (£) indicates a welfare policy which only affected income. RoB = Risk of Bias score; SG = subgroup. CES-D = Center for Epidemiological Studies-Depression scale. CIDI = Composite International Diagnostic Interview. GHQ = General Health Questionnaire. HDL = Health and Daily Living Form. Inc. mood dis. = Incident mood disorder (assessed at clinical interview). Kessler = Kessler Psychological Distress scale. MINI = Mini International Neuropsychiatric Interview. NWS-PTSD = National Women's Study PTSD module. Subj. MH = measure of subjective/self-assessed mental health. WHOQOL = Psychological domain of abbreviated World Health Organisation Quality of Life tool

**Figure G13: Forest plot for meta-analysis of studies reporting the effect of a continuous log(income) change on a mental health outcome, stratified by sex**

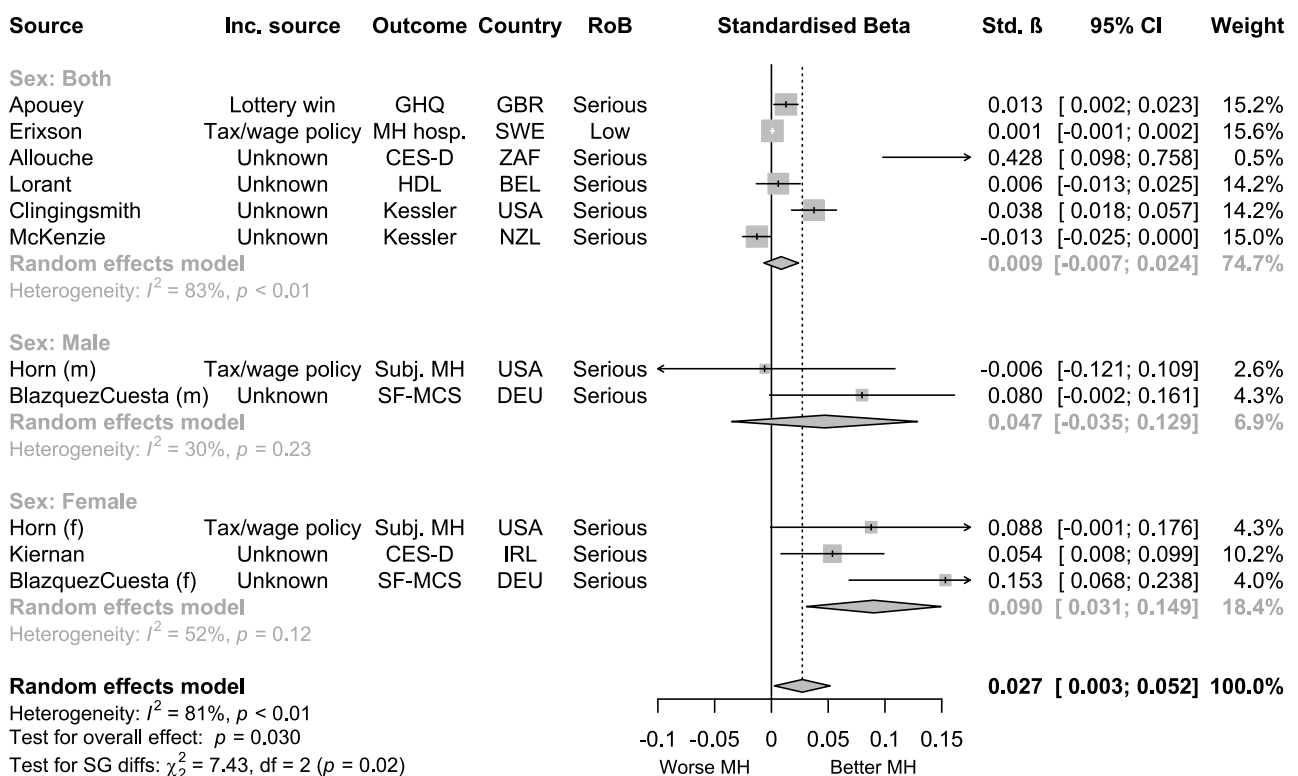



Number of people = 1,510,221; number of observations = 3,036,715. Studies sorted by income source → outcome → RoB. (f) and (m) indicate studies stratified results by sex. RoB = Risk of Bias score; SG = subgroup. CES-D = Center for Epidemiological Studies-Depression scale. GHQ = General Health Questionnaire. HDL = Health and Daily Living Form. Kessler = Kessler Psychological Distress scale. MH hosp. = mental health hospitalisations. Subj. MH = measure of subjective/self-assessed mental health. SF-MCS = Mental Component Summary of Short Form Survey.

**Figure G14: Forest plot for meta-analysis of studies reporting the effect of a continuous log(income) change on a mental health outcome, stratified by socioeconomic position**

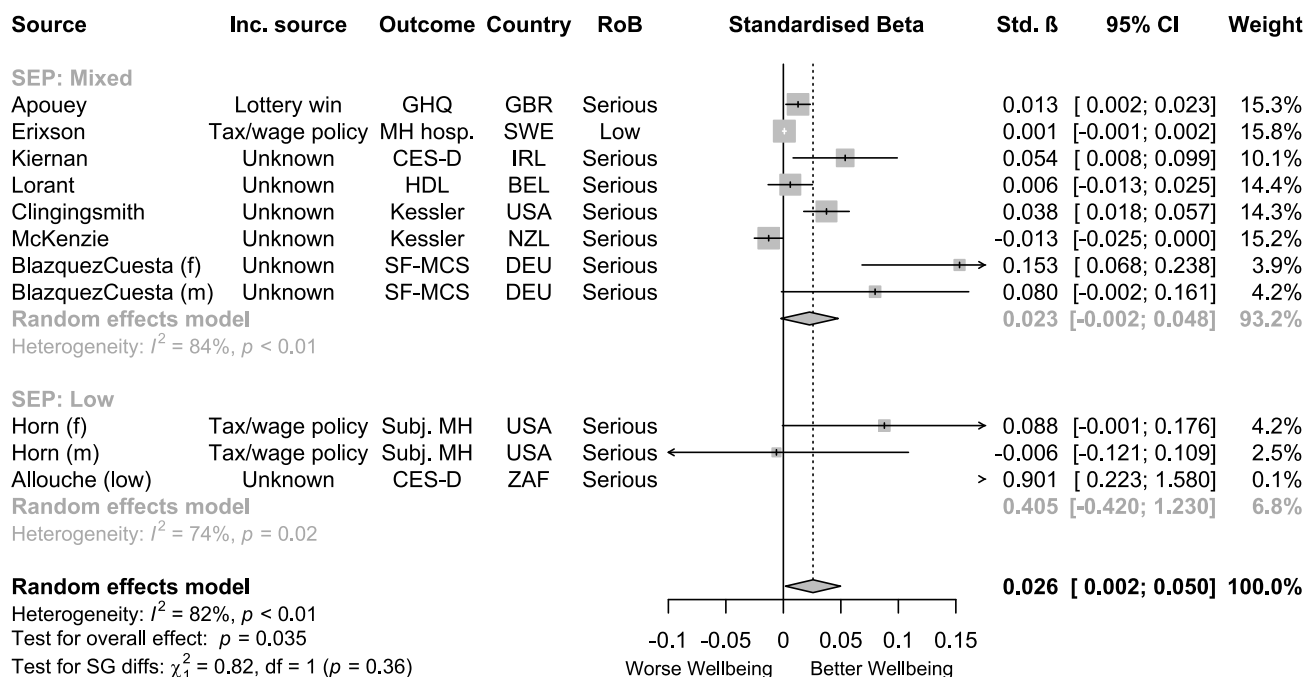

Number of people = 1,510,221; number of observations = 3,036,715. Studies sorted by income source → outcome → RoB. (f) and (m) indicate studies stratified results by sex. RoB = Risk of Bias score; SG = subgroup. CES-D = Center for Epidemiological Studies-Depression scale. GHQ = General Health Questionnaire. HDL = Health and Daily Living Form. Kessler = Kessler Psychological Distress scale. MH hosp. = mental health hospitalisations. Subj. MH = measure of subjective/self-assessed mental health. SF-MCS = Mental Component Summary of Short Form Survey.

**Figure G15: Forest plot for meta-analysis of studies reporting the effect of a continuous log(income) change on a mental health outcome, stratified by age**

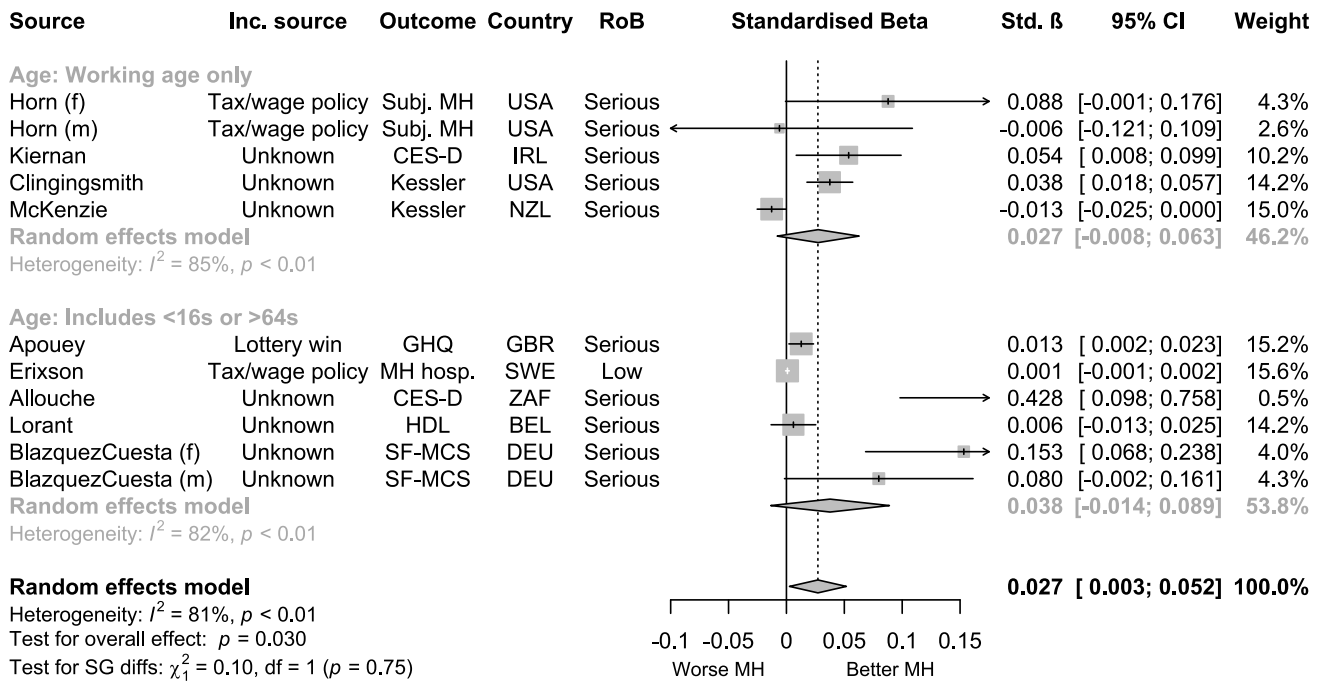

Number of people = 1,510,221; number of observations = 3,036,715. Studies sorted by income source → outcome → RoB. (f) and (m) indicate studies stratified results by sex. RoB = Risk of Bias score; SG = subgroup. CES-D = Center for Epidemiological Studies-Depression scale. GHQ = General Health Questionnaire. HDL = Health and Daily Living Form. Kessler = Kessler Psychological Distress scale. MH hosp. = mental health hospitalisations. Subj. MH = measure of subjective/self-assessed mental health. SF-MCS = Mental Component Summary of Short Form Survey.

**Figure G16: Forest plot for meta-analysis of studies reporting the effect of a binary income increase on a wellbeing outcome, stratified by sex**

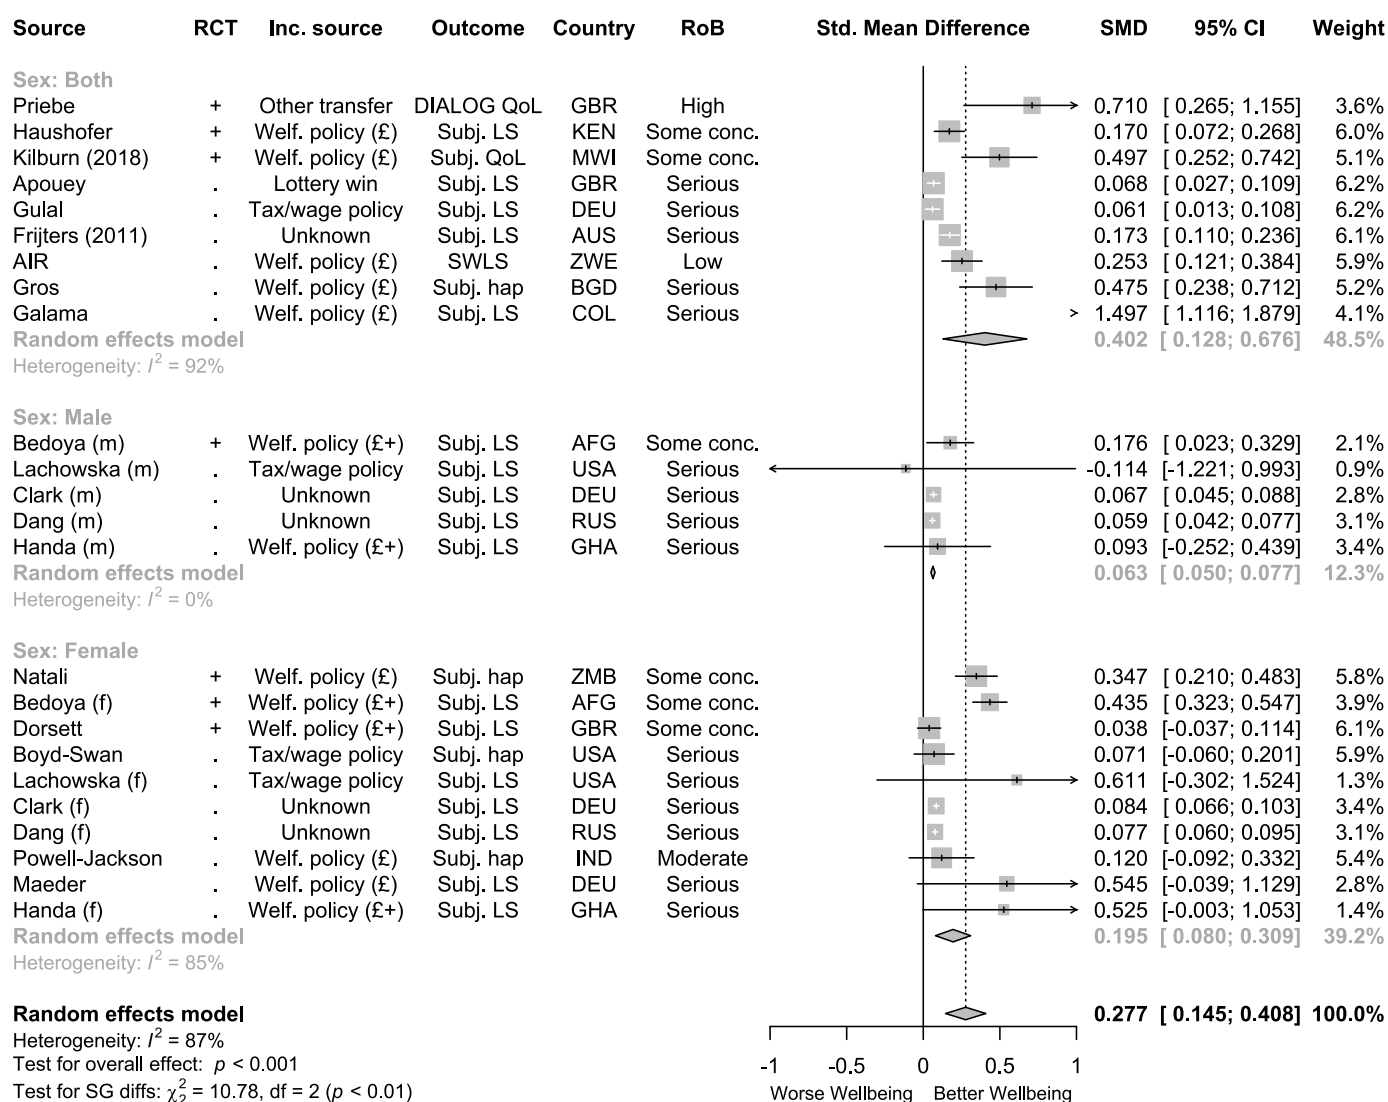

Number of people = 163,969; number of observations = 885,981. Studies sorted by RCT/NRS status → income source → outcome → RoB. + indicates study was a randomised controlled trial. (£) indicates a welfare policy which only affected income; (£+) indicates a welfare policy which also influenced other factors. (f) and (m) indicate studies which stratified results by sex. RoB = Risk of Bias score; SG = subgroup. AIR = American Institutes for Research. DIALOG QoL = DIALOG quality of life scale. Subj. hap = measure of subjective/self-assessed happiness. Subj. LS = measure of subjective/self-assessed life satisfaction. Subj. QoL = measure of subjective/self-assessed quality of life. SWLS = Diener's Satisfaction with Life Scale.

**Figure G17: Forest plot for meta-analysis of studies reporting the effect of a binary income increase on a wellbeing outcome, stratified by study design**

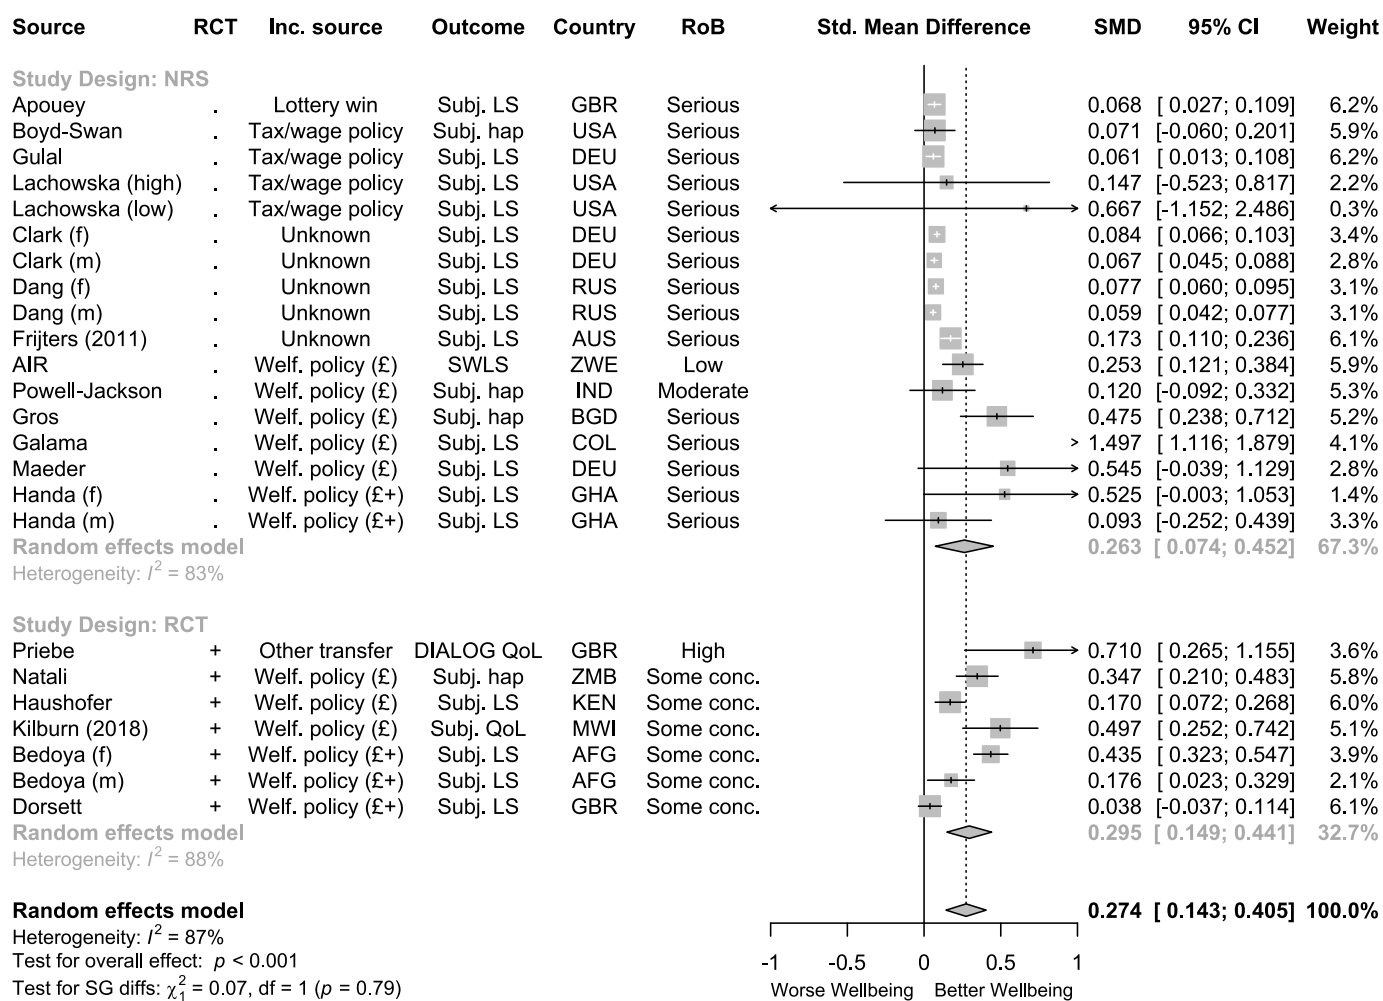

Number of people = 163,969; number of observations = 885,981. Studies sorted by RCT/NRS status → income source → outcome → RoB. + indicates study was a randomised controlled trial. (£) indicates a welfare policy which only affected income; (£+) indicates a welfare policy which also influenced other factors. (f) and (m) indicate studies which stratified results by sex. RoB = Risk of Bias score; SG = subgroup. AIR = American Institutes for Research. DIALOG QoL = DIALOG quality of life scale. Subj. hap = measure of subjective/self-assessed happiness. Subj. LS = measure of subjective/self-assessed life satisfaction. Subj. QoL = measure of subjective/self-assessed quality of life. SWLS = Diener's Satisfaction with Life Scale.

**Figure G18: Forest plot for meta-analysis of studies reporting the effect of a binary income increase on a wellbeing outcome, stratified by risk of bias**

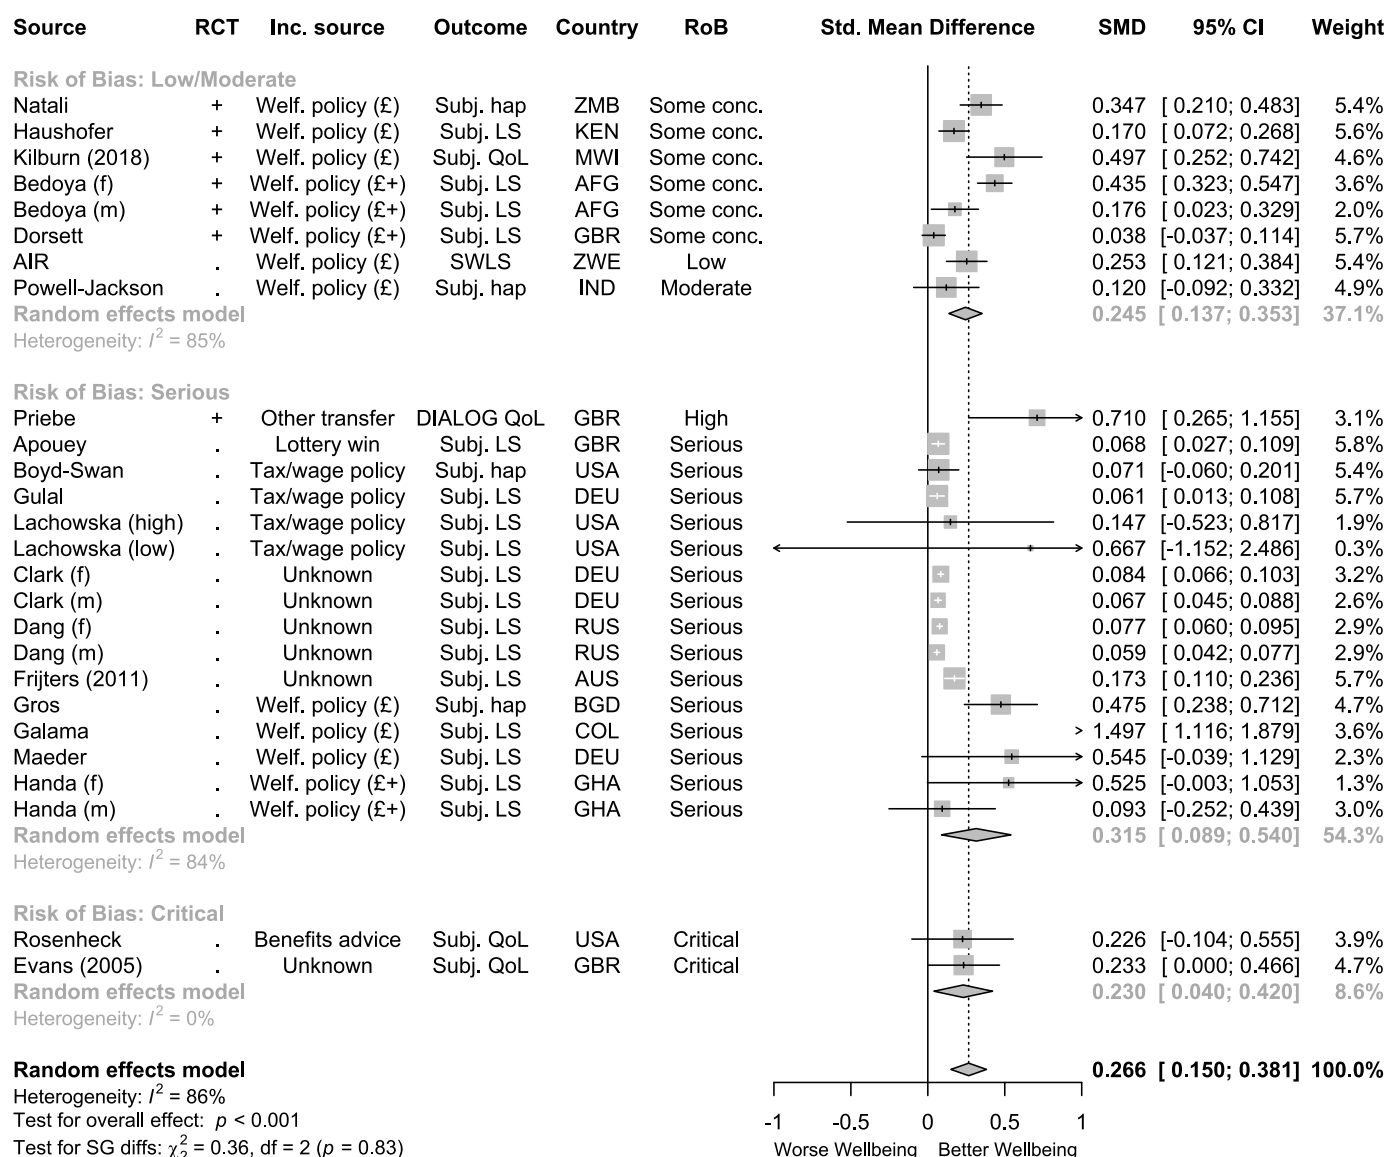

Number of people = 165,217; number of observations = 888,304. Studies sorted by RCT/NRS status → income source → outcome → RoB. + indicates study was a randomised controlled trial. (£) indicates a welfare policy which only affected income; (£+) indicates a welfare policy which also influenced other factors. (f) and (m) indicate studies which stratified results by sex. RoB = Risk of Bias score; SG = subgroup. AIR = American Institutes for Research. DIALOG QoL = DIALOG quality of life scale. Subj. hap = measure of subjective/self-assessed happiness. Subj. LS = measure of subjective/self-assessed life satisfaction. Subj. QoL = measure of subjective/self-assessed quality of life. SWLS = Diener's Satisfaction with Life Scale.

**Figure G19: Forest plot for meta-analysis of studies reporting the effect of a binary income increase on a wellbeing outcome, stratified by whether increase likely to move individual out of poverty**

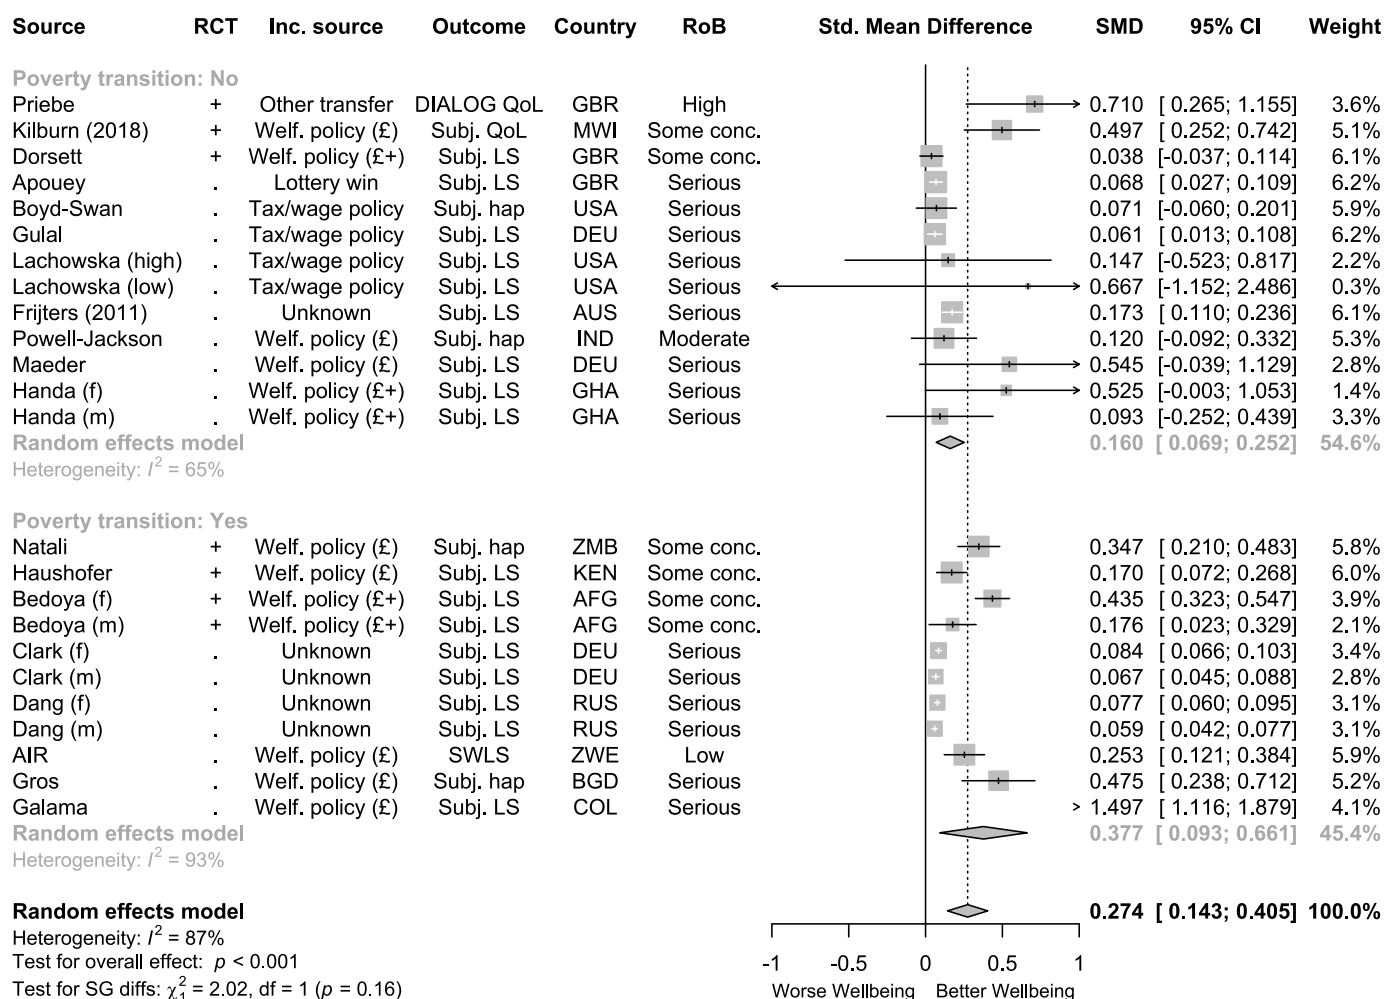

Number of people = 163,969; number of observations = 885,981. Studies sorted by RCT/NRS status → income source → outcome → RoB. + indicates study was a randomised controlled trial. (£) indicates a welfare policy which only affected income; (£+) indicates a welfare policy which also influenced other factors. (f) and (m) indicate studies which stratified results by sex. RoB = Risk of Bias score; SG = subgroup. AIR = American Institutes for Research. DIALOG QoL = DIALOG quality of life scale. Subj. hap = measure of subjective/self-assessed happiness. Subj. LS = measure of subjective/self-assessed life satisfaction. Subj. QoL = measure of subjective/self-assessed quality of life. SWLS = Diener's Satisfaction with Life Scale.

**Figure G20: Forest plot for meta-analysis of studies reporting the effect of a binary income increase on a wellbeing outcome, stratified by socioeconomic position**

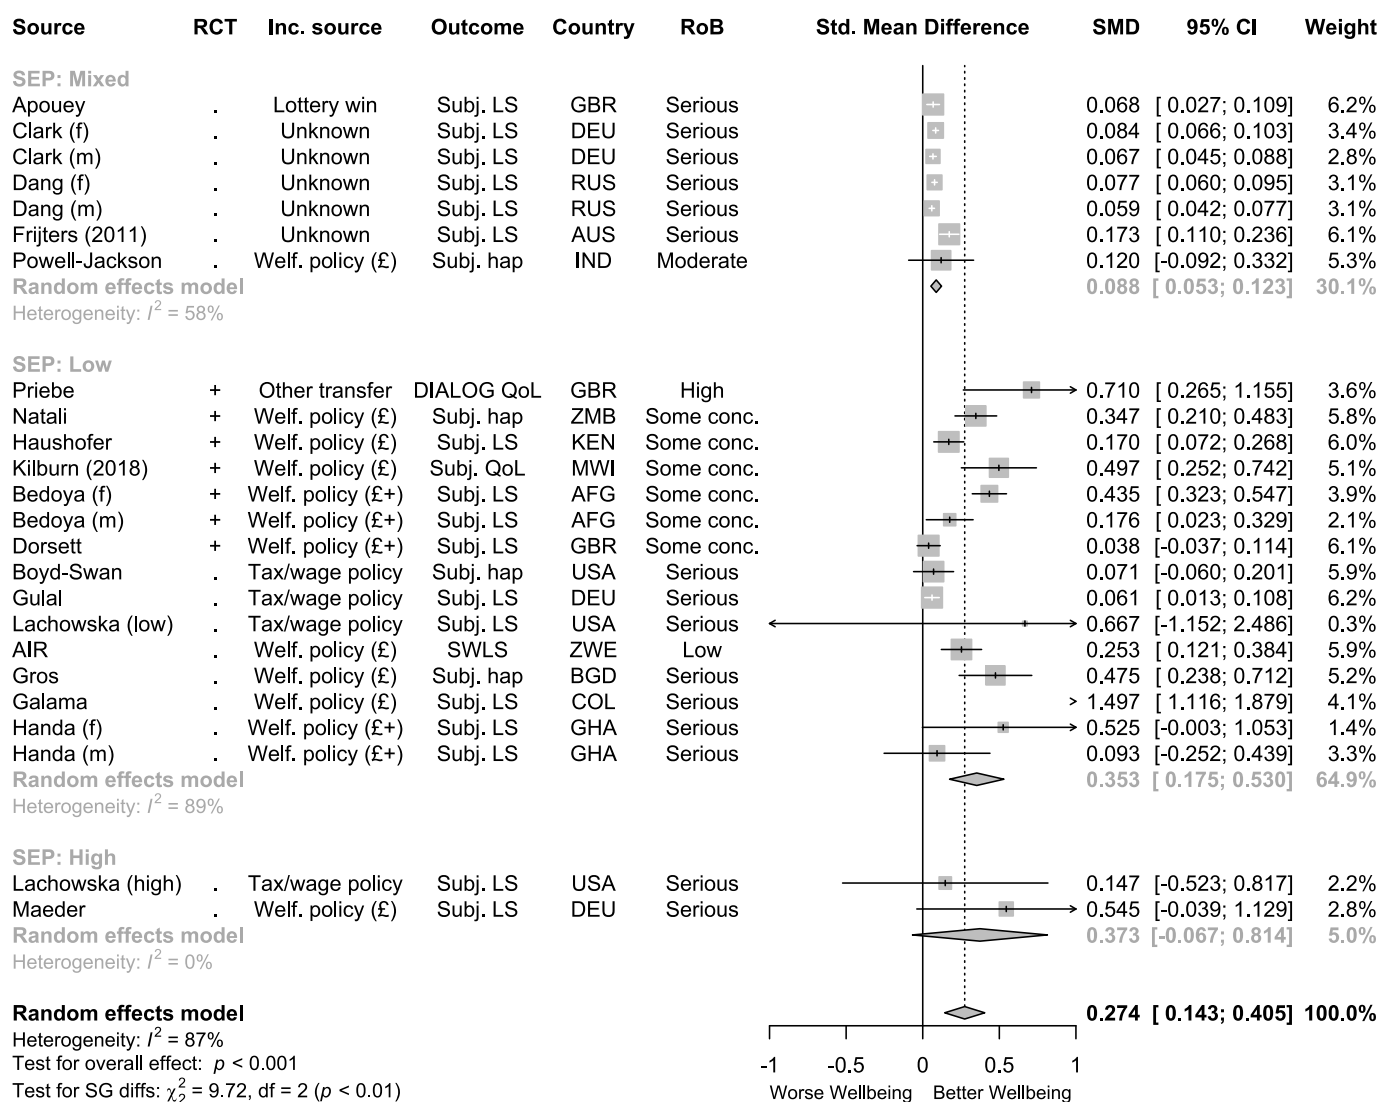

Number of people = 163,969; number of observations = 885,981. Studies sorted by RCT/NRS status → income source → outcome → RoB. + indicates study was a randomised controlled trial. (£) indicates a welfare policy which only affected income; (£+) indicates a welfare policy which also influenced other factors. (f) and (m) indicate studies which stratified results by sex. RoB = Risk of Bias score; SG = subgroup. AIR = American Institutes for Research. DIALOG QoL = DIALOG quality of life scale. Subj. hap = measure of subjective/self-assessed happiness. Subj. LS = measure of subjective/self-assessed life satisfaction. Subj. QoL = measure of subjective/self-assessed quality of life. SWLS = Diener's Satisfaction with Life Scale.



**Figure G21: Forest plot for meta-analysis of studies reporting the effect of a binary income increase on a wellbeing outcome, stratified by setting**

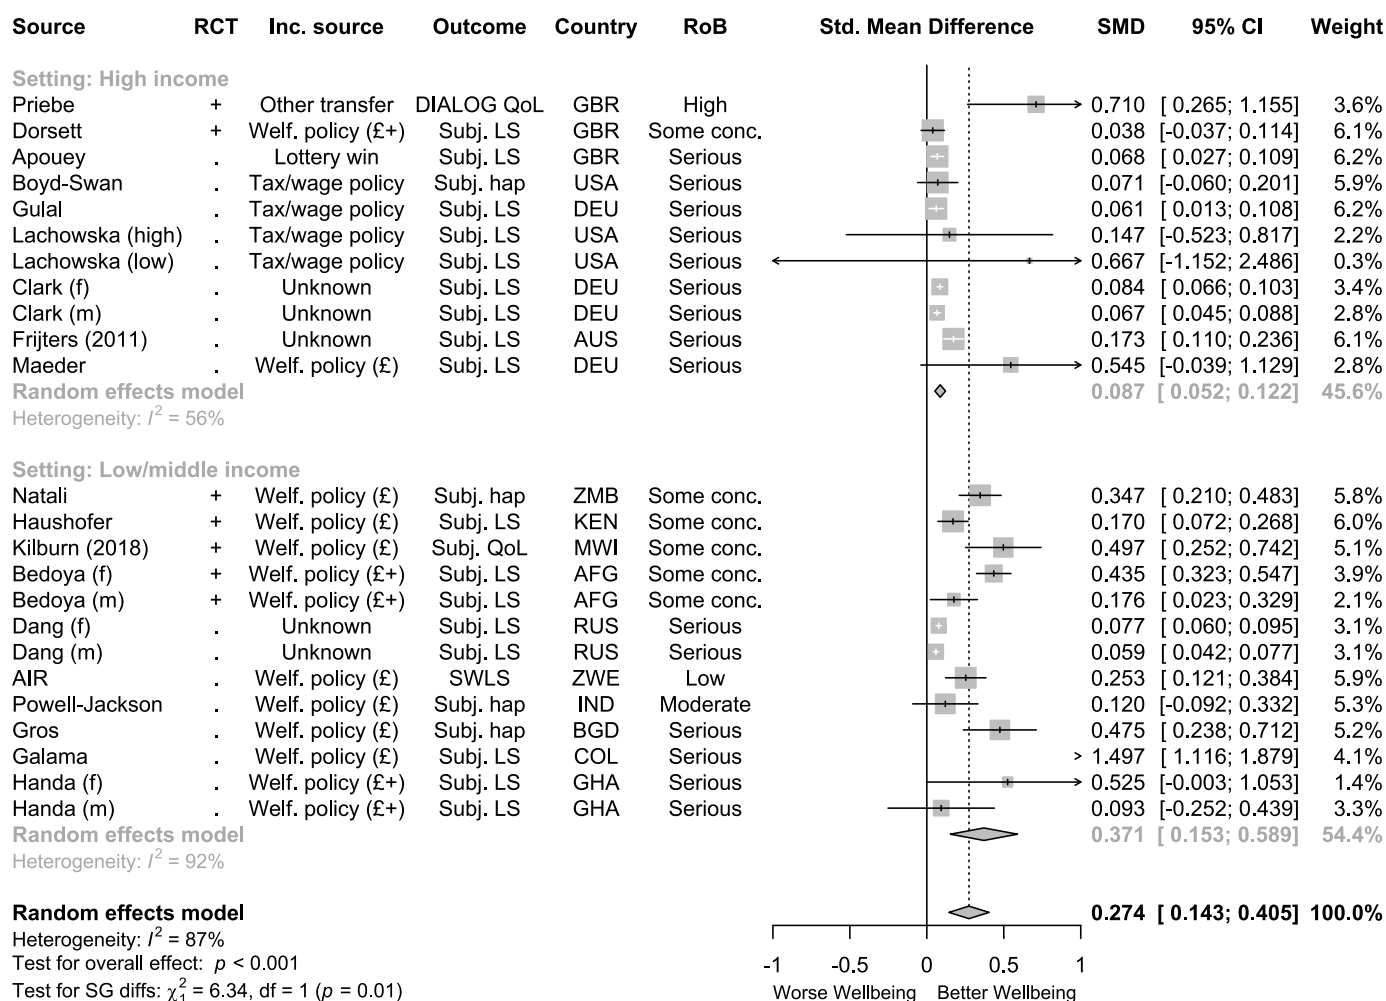

Number of people = 163,969; number of observations = 885,981. Studies sorted by RCT/NRS status → income source → outcome → RoB. + indicates study was a randomised controlled trial. (£) indicates a welfare policy which only affected income; (£+) indicates a welfare policy which also influenced other factors. (f) and (m) indicate studies which stratified results by sex. RoB = Risk of Bias score; SG = subgroup. AIR = American Institutes for Research. DIALOG QoL = DIALOG quality of life scale. Subj. hap = measure of subjective/self-assessed happiness. Subj. LS = measure of subjective/self-assessed life satisfaction. Subj. QoL = measure of subjective/self-assessed quality of life. SWLS = Diener's Satisfaction with Life Scale.



**Figure G22: Forest plot for meta-analysis of studies reporting the effect of a binary income increase on a wellbeing outcome, stratified by age**

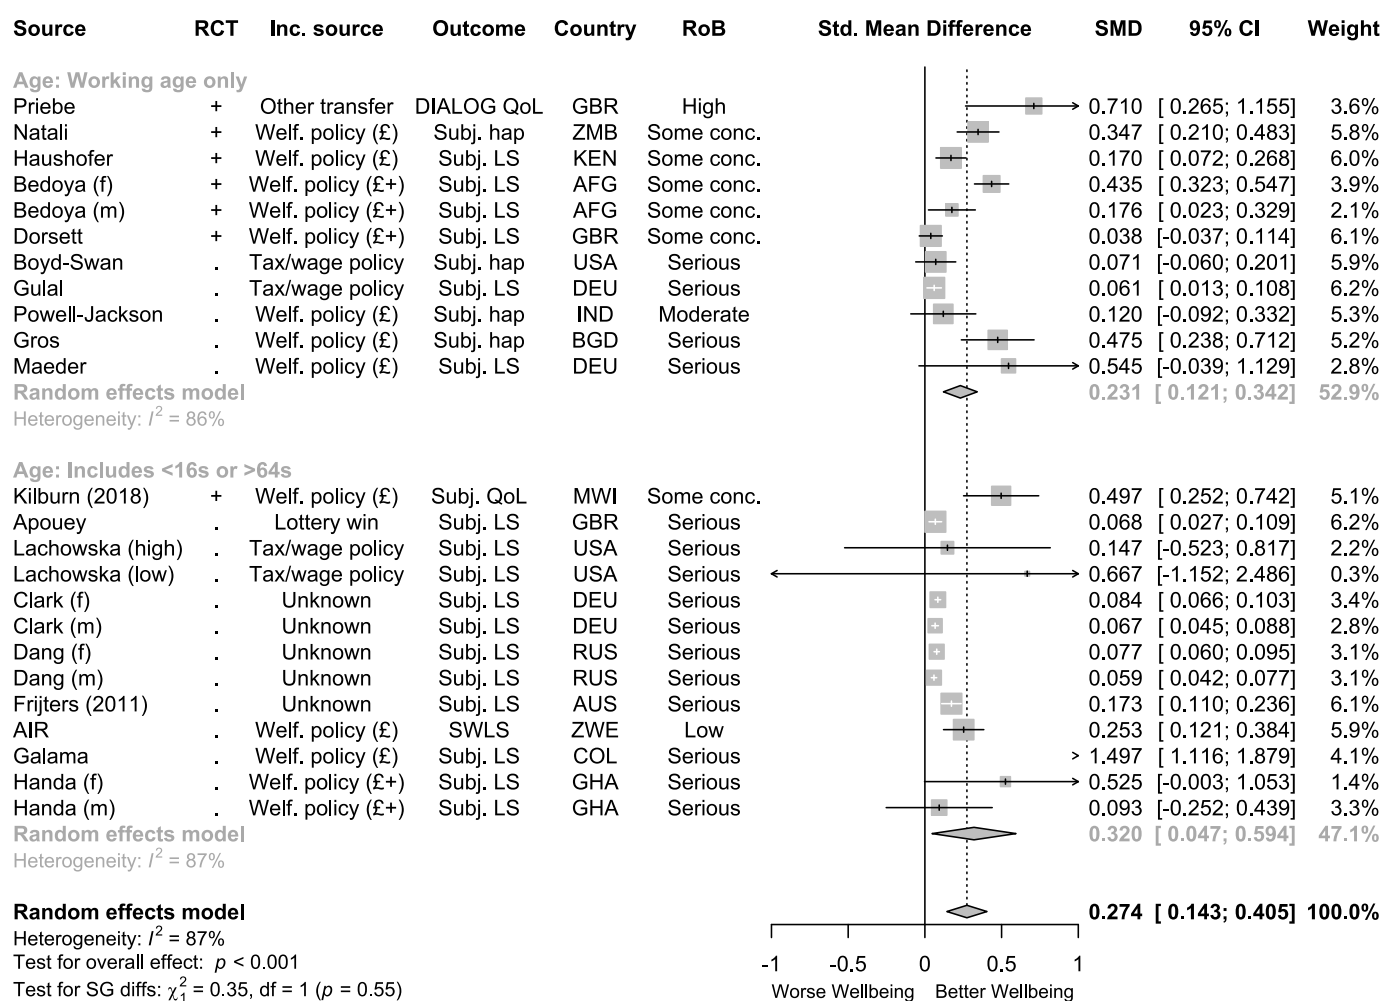

Number of people = 163,969; number of observations = 885,981. Studies sorted by RCT/NRS status → income source → outcome → RoB. + indicates study was a randomised controlled trial. (£) indicates a welfare policy which only affected income; (£+) indicates a welfare policy which also influenced other factors. (f) and (m) indicate studies which stratified results by sex. RoB = Risk of Bias score; SG = subgroup. AIR = American Institutes for Research. DIALOG QoL = DIALOG quality of life scale. Subj. hap = measure of subjective/self-assessed happiness. Subj. LS = measure of subjective/self-assessed life satisfaction. Subj. QoL = measure of subjective/self-assessed quality of life. SWLS = Diener's Satisfaction with Life Scale.

**Figure G23: Forest plot for meta-analysis of studies reporting the effect of a binary income decrease on a wellbeing outcome, stratified by risk of bias**

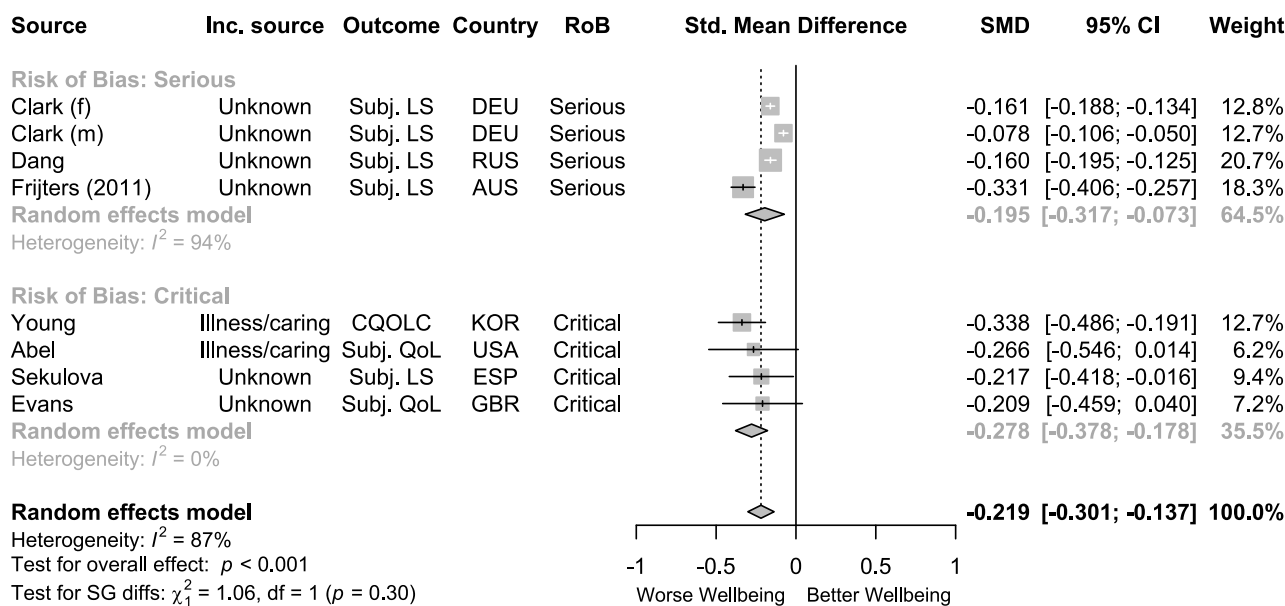

Number of people = 65,456; number of observations = 472,754. Studies sorted by RCT/NRS status → income source → outcome → RoB. (f) and (m) indicate studies which stratified results by sex. RoB = Risk of Bias score; SG = subgroup. CWOLC = Caregiver Quality of Life Index-Cancer. Subj. LS = measure of subjective/self-assessed life satisfaction. Subj. QoL = measure of subjective/self-assessed quality of life.

**Figure G24: Forest plot for meta-analysis of studies reporting the effect of a continuous log(income) change on a wellbeing outcome, stratified by sex**

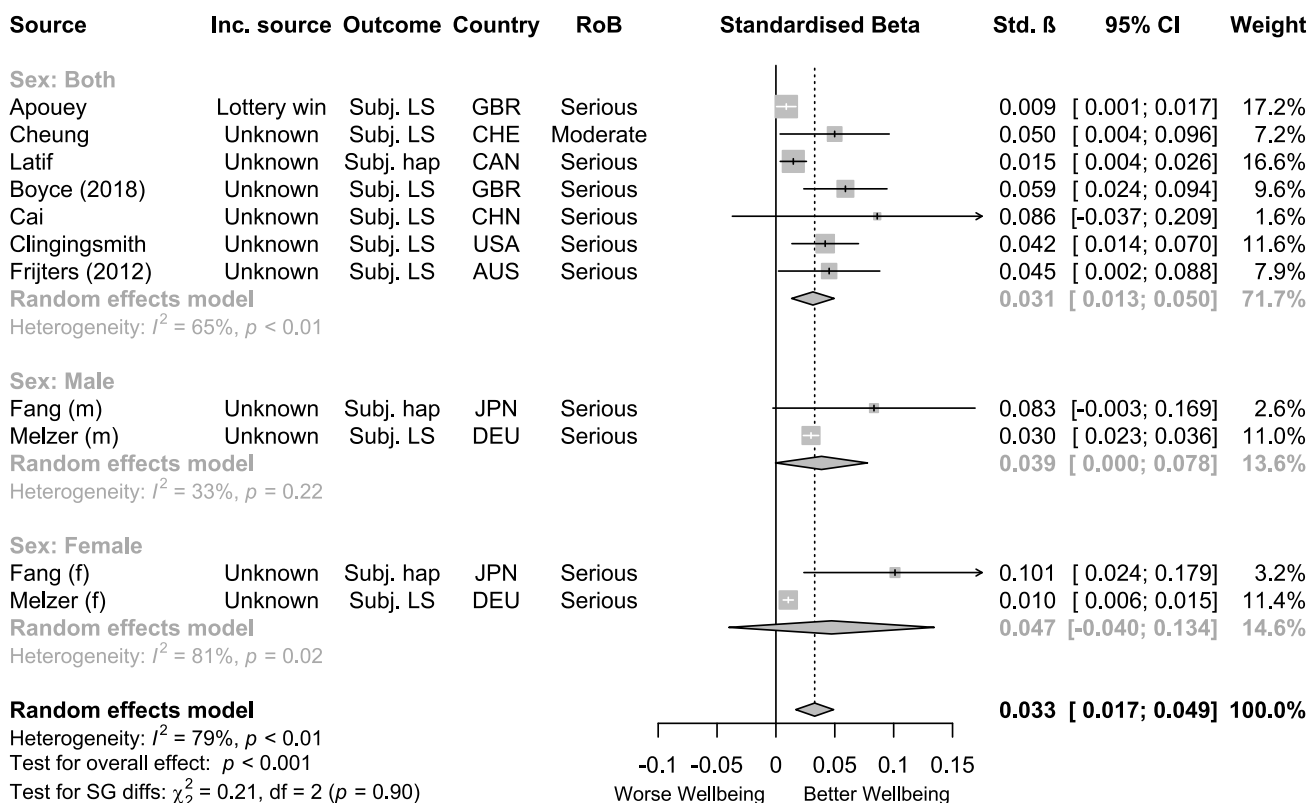

Number of people = 105,326; number of observations = 567,356. Studies sorted by RCT/NRS status → income source → outcome → RoB. (f) and (m) indicate studies stratified results by sex. RoB = Risk of Bias score; SG = subgroup. Subj. hap = measure of subjective/self-assessed happiness. Subj. LS = measure of subjective/self-assessed life satisfaction.

**Figure G25: Forest plot for meta-analysis of studies reporting the effect of a continuous log(income) change on a wellbeing outcome, stratified by age**

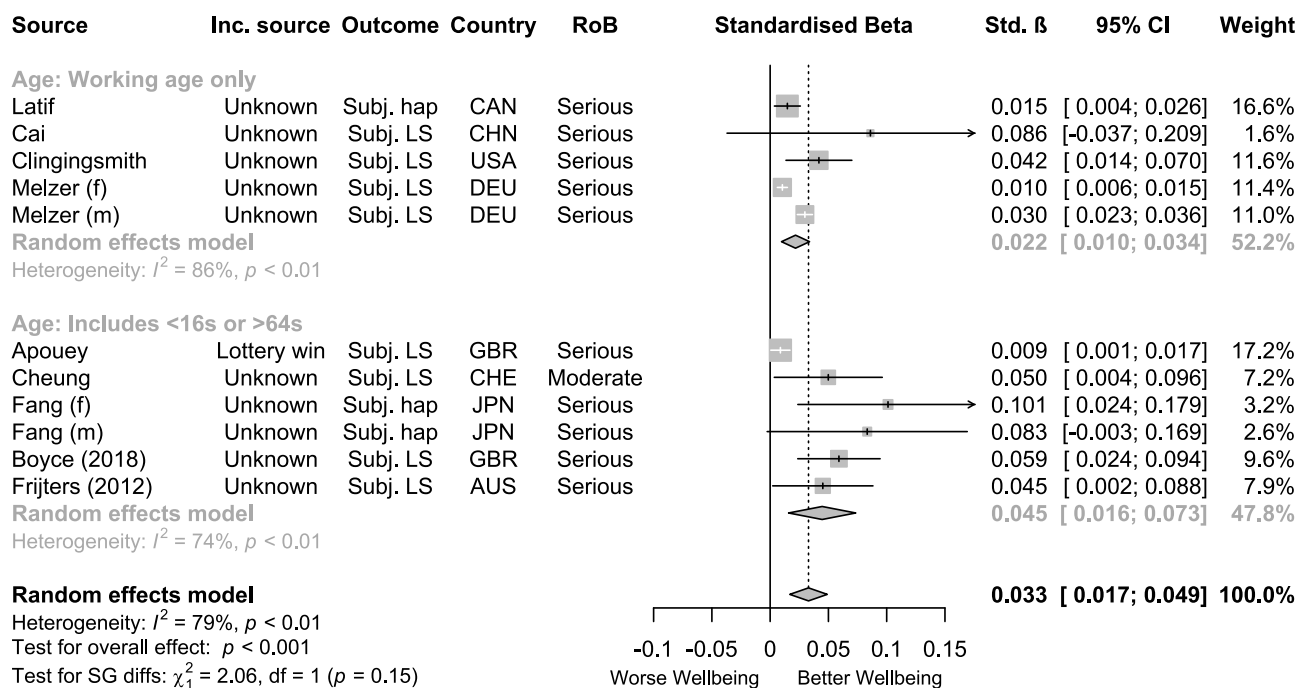

Number of people = 105,326; number of observations = 567,356. Studies sorted by RCT/NRS status → income source → outcome → RoB. (f) and (m) indicate studies stratified results by sex. RoB = Risk of Bias score; SG = subgroup. Subj. hap = measure of subjective/self-assessed happiness. Subj. LS = measure of subjective/self-assessed life satisfaction.

## Additional analysis using binary outcomes

**Figure G26: Forest plot for meta-analysis of studies reporting the effect of a continuous log(income) change on a binary mental health outcome**

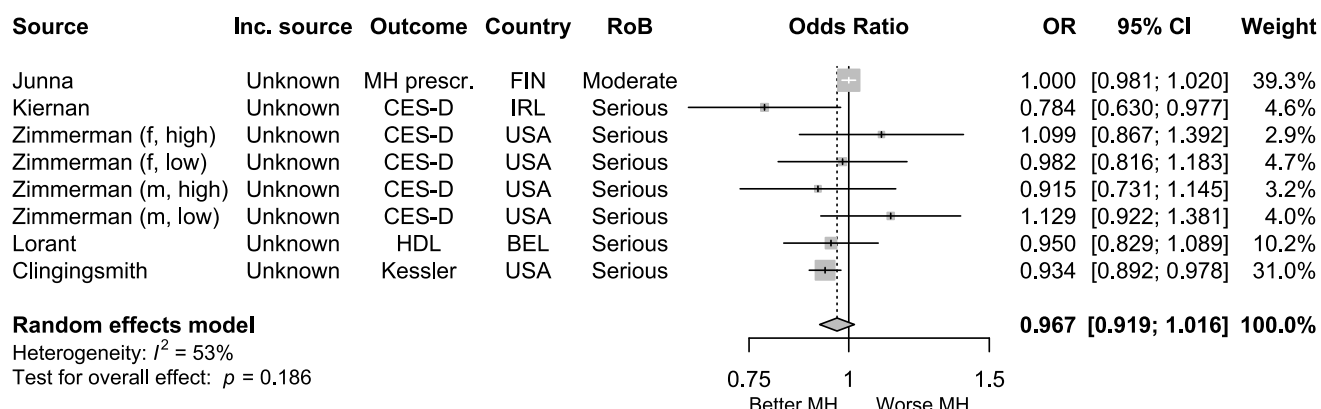

Number of people = 368,714; number of observations = 2,943,756. Studies sorted by income source → outcome → RoB. (f) and (m) indicate studies stratified results by sex. (low) and (high) indicate studies stratified results by socioeconomic position (for Zimmerman, measured by whether household income was below or above study median). RoB = Risk of Bias score; SG = subgroup. CES-D = Center for Epidemiological Studies-Depression scale. HDL = Health and Daily Living Form. Kessler = Kessler Psychological Distress scale. MH prescr. = measure of mental health prescriptions.

**Figure G27: Forest plot for meta-analysis of studies reporting the effect of a continuous log(income) change on a binary mental health outcome, stratified by sex**

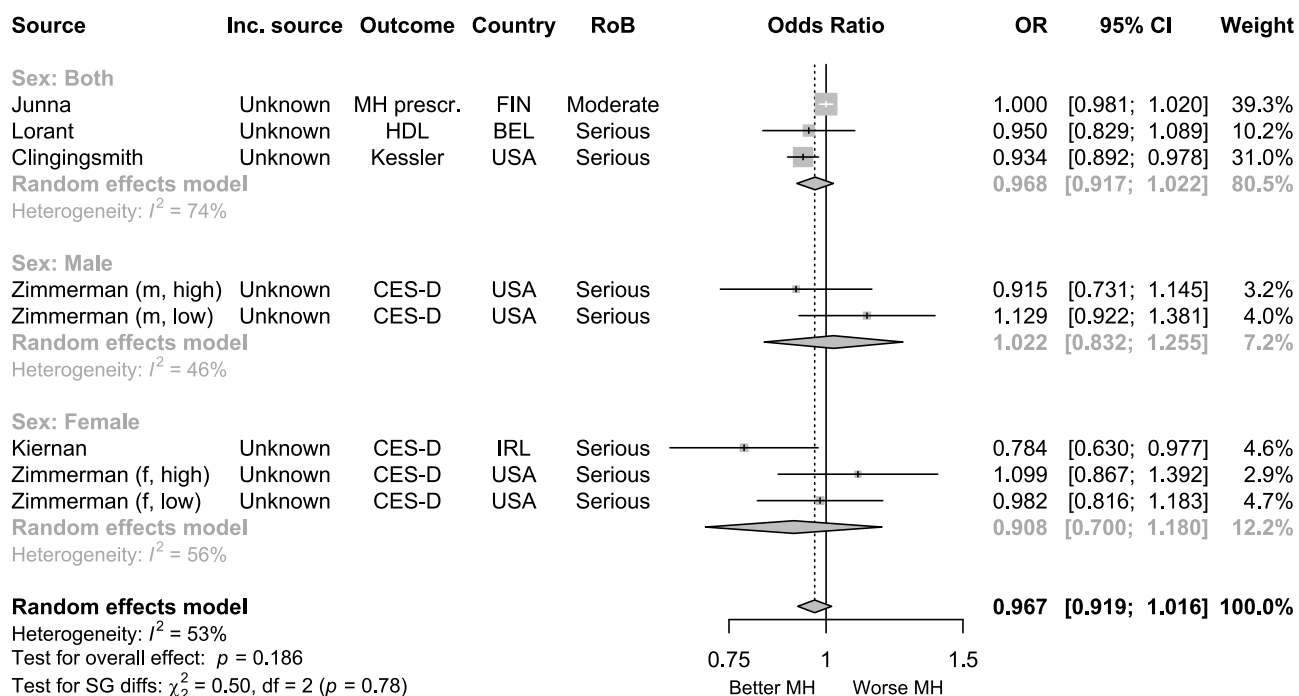

Number of people = 368,714; number of observations = 2,943,756. Studies sorted by income source → outcome → RoB. (f) and (m) indicate studies stratified results by sex. (low) and (high) indicate studies stratified results by socioeconomic position (for Zimmerman, measured by whether household income was below or above study median). RoB = Risk of Bias score; SG = subgroup. CES-D = Center for Epidemiological Studies-Depression scale. HDL = Health and Daily Living Form. Kessler = Kessler Psychological Distress scale. MH prescr. = measure of mental health prescriptions.

## Sensitivity analysis excluding calculations which used an external standard deviation

Figure G28: Forest plot for meta-analysis of studies reporting the effect of a binary income increase on a mental health outcome, excluding calculations using an external standard deviation

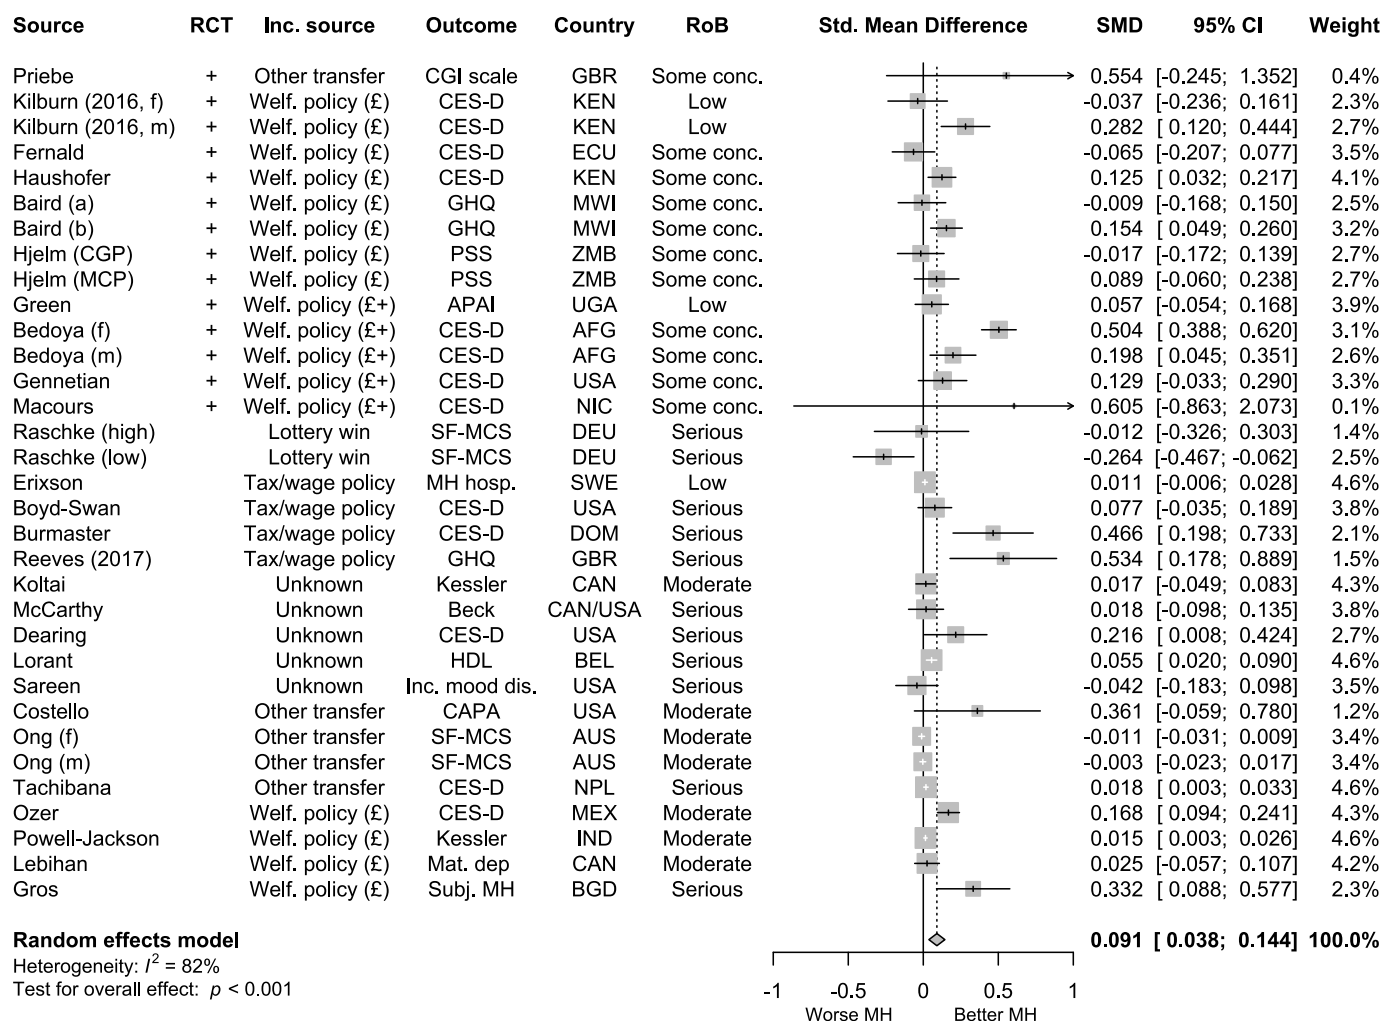

Number of people = 155,940; number of observations = 1,581,150. Studies sorted by RCT/NRS status → income source → outcome → RoB. + indicates study was a randomised controlled trial. (£) indicates a welfare policy which only affected income; (£+) indicates a welfare policy which also influenced other factors. (f) and (m) indicate studies which stratified results by sex; (high) and (low) indicate Raschke et al. stratified results by educational attainment. Baird (a) reported on a cash transfer to school dropouts versus Baird (b) which reported on a cash transfer to girls still enrolled in school; Hjelm (CGP) reported on the Zambia Child Grant Program versus Hjelm (MCP) which reported on the Zambia Multiple Category Cash Transfer Program. RoB = Risk of Bias score; SG = subgroup. APAI = Acholi Psychosocial Assessment Instrument. Beck = Beck depression inventory. CAPA = Child and Adolescent Psychiatric Assessment. CES-D = Center for Epidemiological Studies-Depression scale. CGI = Clinical Global Impression scale. GHQ = General Health Questionnaire. HDL = Health and Daily Living Form. Inc. mood dis. = Incident mood disorder (assessed at clinical interview). Kessler = Kessler Psychological Distress scale. Mat. dep = measure of maternal depression. MH hosp. = mental health hospitalisations. PSS = Perceived Stress Scale. SF-MCS = Mental Component Summary of Short Form Survey. Subj. MH = measure of subjective/self-assessed mental health.

**Figure G29: Forest plot for meta-analysis of studies reporting the effect of a binary income decrease on a mental health outcome, excluding calculations using an external standard deviation**

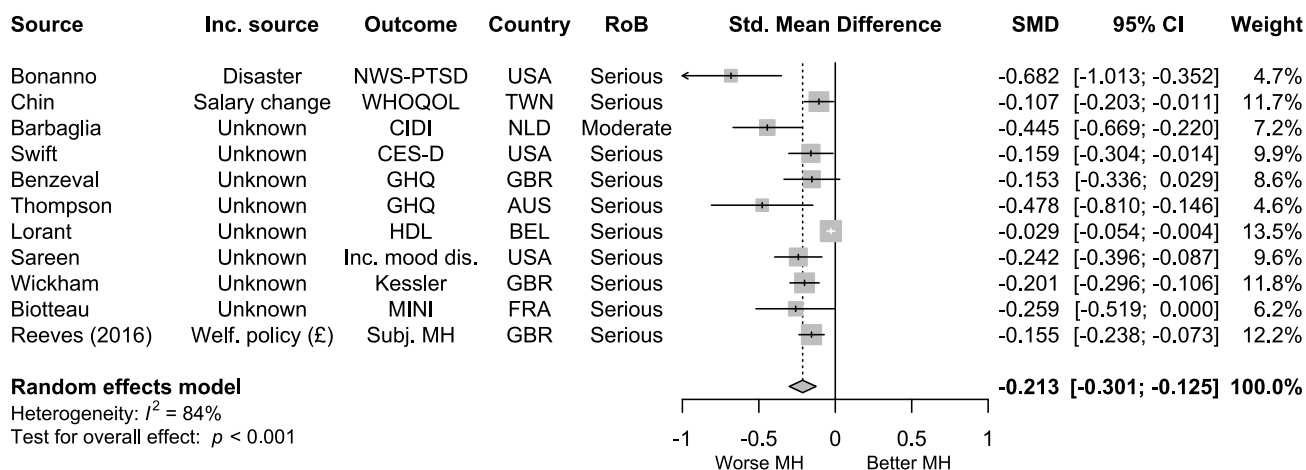

Number of people = 227,804; number of observations = 281,728. Studies sorted by income source → outcome → RoB. (£) indicates a welfare policy which only affected income. RoB = Risk of Bias score; SG = subgroup. CES-D = Center for Epidemiological Studies-Depression scale. CIDI = Composite International Diagnostic Interview. GHQ = General Health Questionnaire. HDL = Health and Daily Living Form. Inc. mood dis. = Incident mood disorder (assessed at clinical interview). Kessler = Kessler Psychological Distress scale. MINI = Mini International Neuropsychiatric Interview. NWS-PTSD = National Women's Study PTSD module. Subj. MH = measure of subjective/self-assessed mental health. WHOQOL = Psychological domain of abbreviated World Health Organisation Quality of Life tool

**Figure G30: Forest plot for meta-analysis of studies reporting the effect of a continuous log(income) change on a mental health outcome, excluding calculations using an external standard deviation**

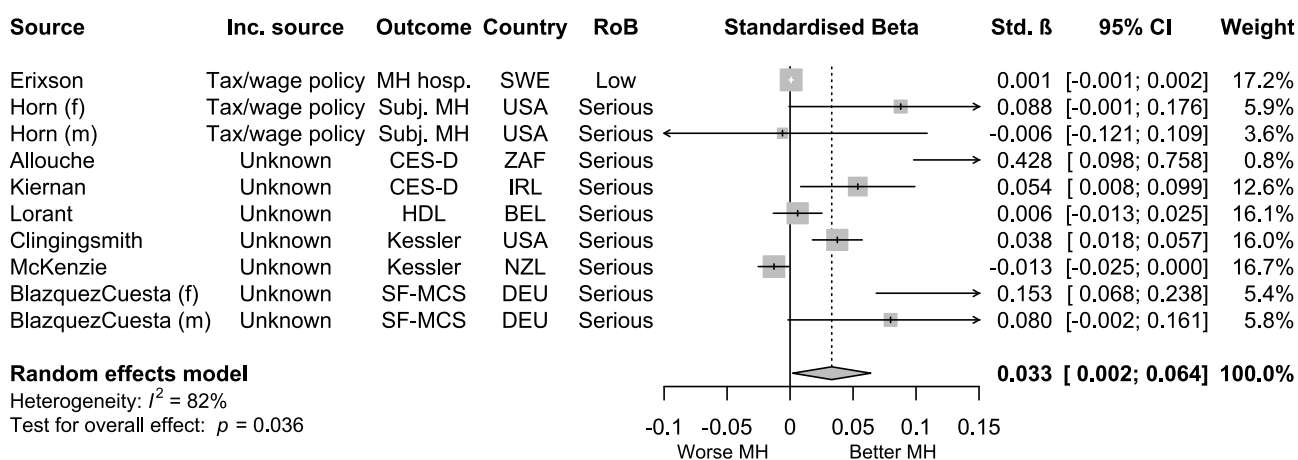

**standard deviation**

Number of people = 1,494,021; number of observations = 2,948,637. Studies sorted by income source → outcome → RoB. (f) and (m) indicate studies stratified results by sex. RoB = Risk of Bias score; SG = subgroup. CES-D = Center for Epidemiological Studies-Depression scale. GHQ = General Health Questionnaire. HDL = Health and Daily Living Form. Kessler = Kessler Psychological Distress scale. MH hosp. = mental health hospitalisations. Subj. MH = measure of subjective/self-assessed mental health. SF-MCS = Mental Component Summary of Short Form Survey.



**Figure G31: Forest plot for meta-analysis of studies reporting the effect of a continuous log(income) change on a binary mental health outcome, excluding calculations using an external standard deviation**

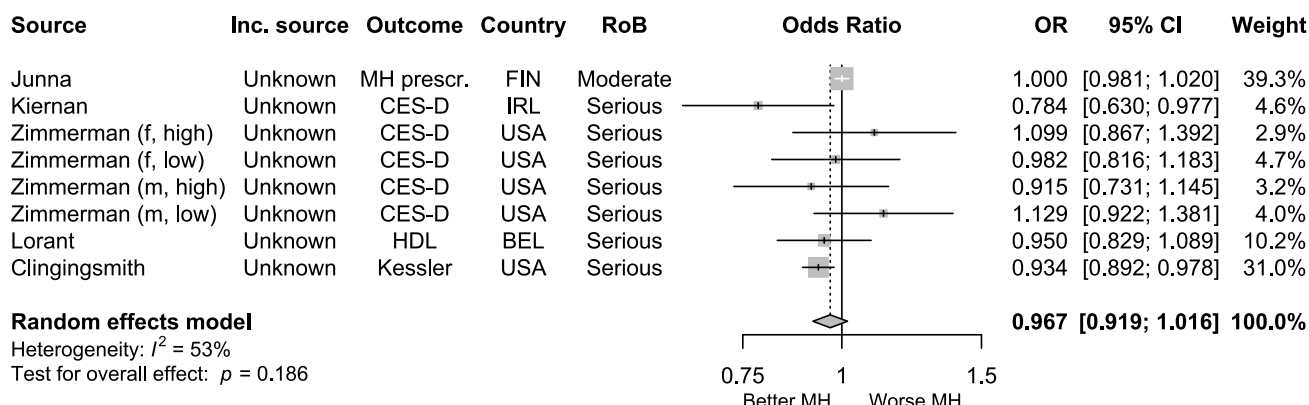

Number of people = 368,714; number of observations = 2,943,756. Studies sorted by income source → outcome → RoB. (f) and (m) indicate studies stratified results by sex. (low) and (high) indicate studies stratified results by socioeconomic position (for Zimmerman, measured by whether household income was below or above study median). RoB = Risk of Bias score; SG = subgroup. CES-D = Center for Epidemiological Studies-Depression scale. HDL = Health and Daily Living Form. Kessler = Kessler Psychological Distress scale. MH prescr. = measure of mental health prescriptions.

**Figure G32: Forest plot for meta-analysis of studies reporting the effect of a binary income increase on a wellbeing outcome, excluding calculations using an external standard deviation**

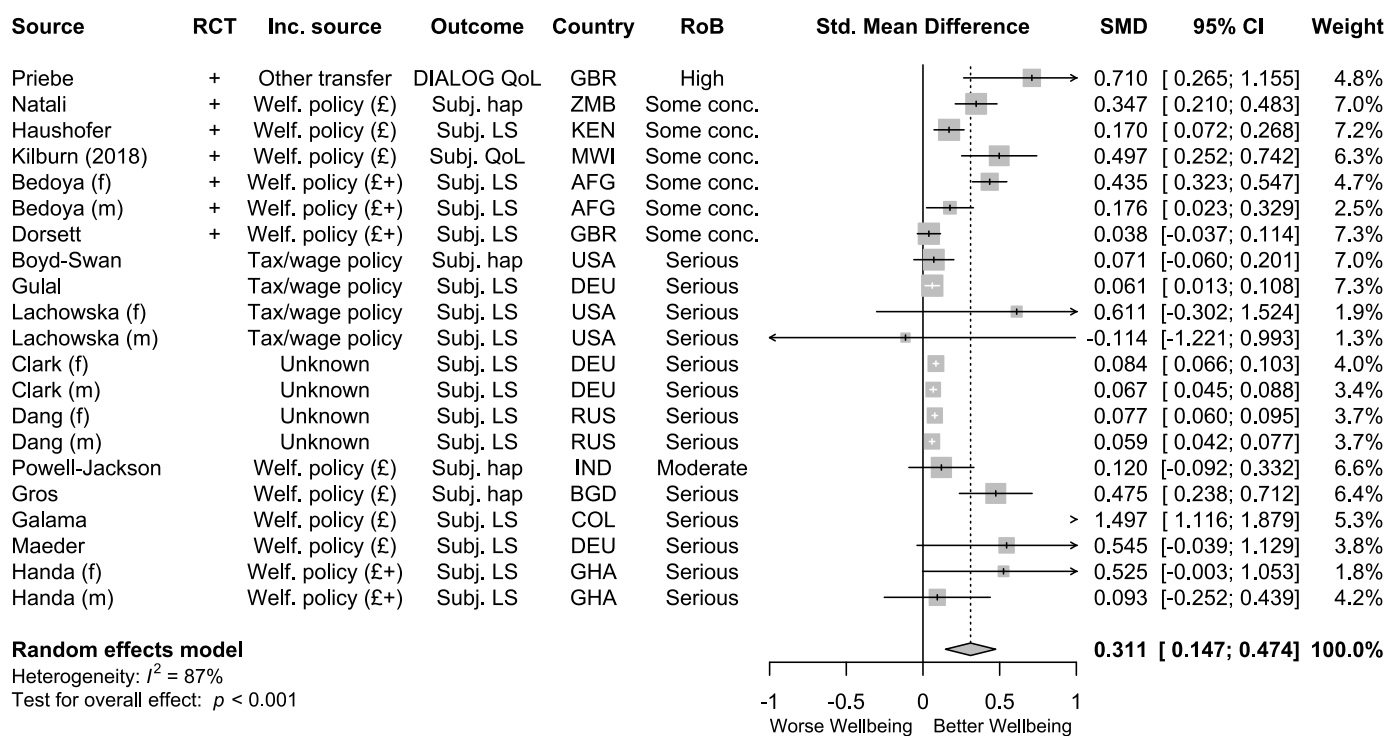

Number of people = 134,232; number of observations = 702,110. Studies sorted by RCT/NRS status → income source → outcome → RoB. + indicates study was a randomised controlled trial. (£) indicates a welfare policy which only affected income; (£+) indicates a welfare policy which also influenced other factors. (f) and (m) indicate studies which stratified results by sex. RoB = Risk of Bias score; SG = subgroup. DIALOG QoL = DIALOG quality of life scale. Subj. hap = measure of subjective/self-assessed happiness. Subj. LS = measure of subjective/self-assessed life satisfaction. Subj. QoL = measure of subjective/self-assessed quality of life.

**Figure G33: Forest plot for meta-analysis of studies reporting the effect of a continuous log(income) change on a wellbeing outcome, excluding calculations using an external standard**

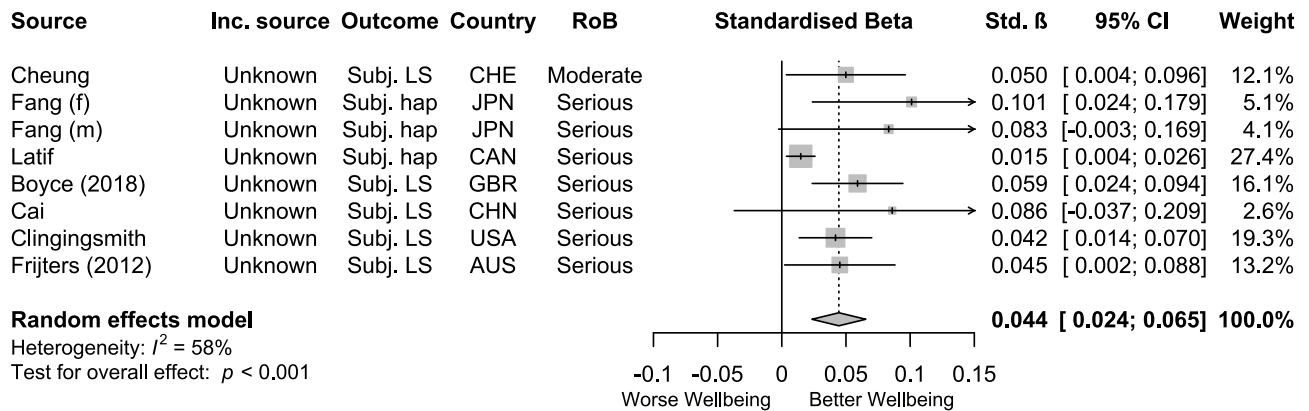

**deviation**

Number of people = 50,066; number of observations = 223,207. Studies sorted by RCT/NRS status → income source → outcome → RoB. (f) and (m) indicate studies stratified results by sex. RoB = Risk of Bias score; SG = subgroup. Subj. hap = measure of subjective/self-assessed happiness. Subj. LS = measure of subjective/self-assessed life satisfaction.

**Funnel plots and Egger’s test investigating publication bias/small study effect**

**Figure G34: Funnel plot for meta-analysis of studies reporting the effect of a binary income increase on a mental health outcome (Fig. 3A)**

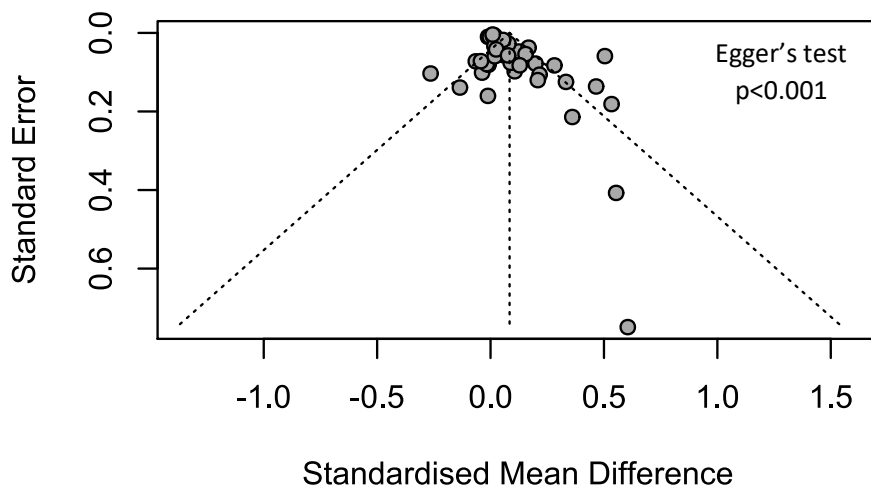



**Figure G35: Funnel plot for meta-analysis of studies reporting the effect of a binary income decrease on a mental health outcome (Fig. 3B)**

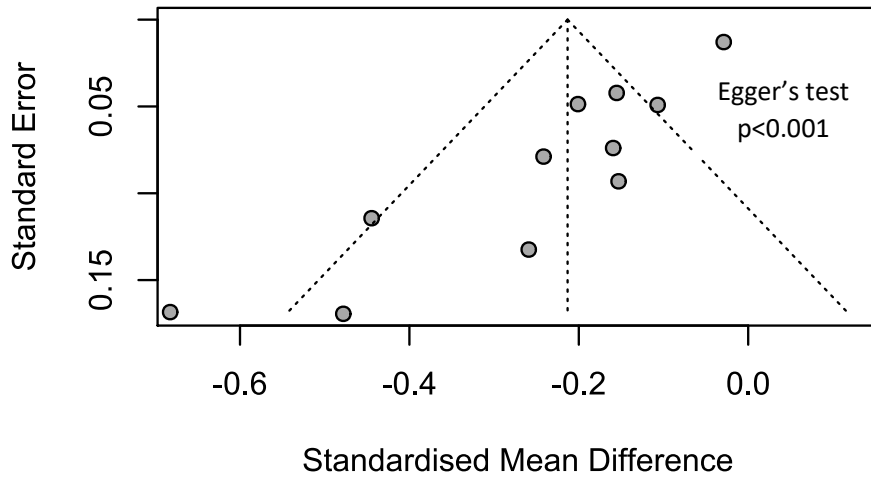

**Figure G36: Funnel plot for meta-analysis of studies reporting the effect of a continuous log(income) change on a mental health outcome (Fig. 3C)**

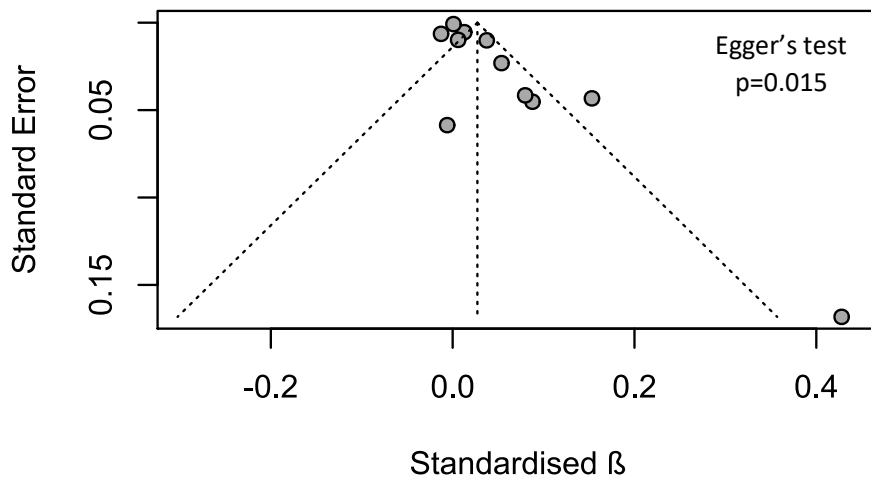

**Figure G37: Funnel plot for meta-analysis of studies reporting the effect of a binary income increase on a wellbeing outcome (Fig. 4A)**

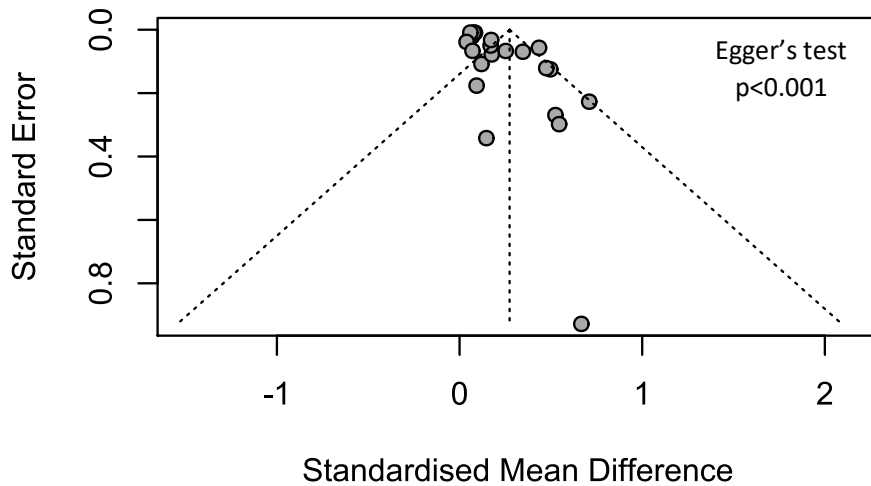

**Figure G38: Funnel plot for meta-analysis of studies reporting the effect of a continuous log(income) change on a wellbeing outcome (Fig. 4B)**

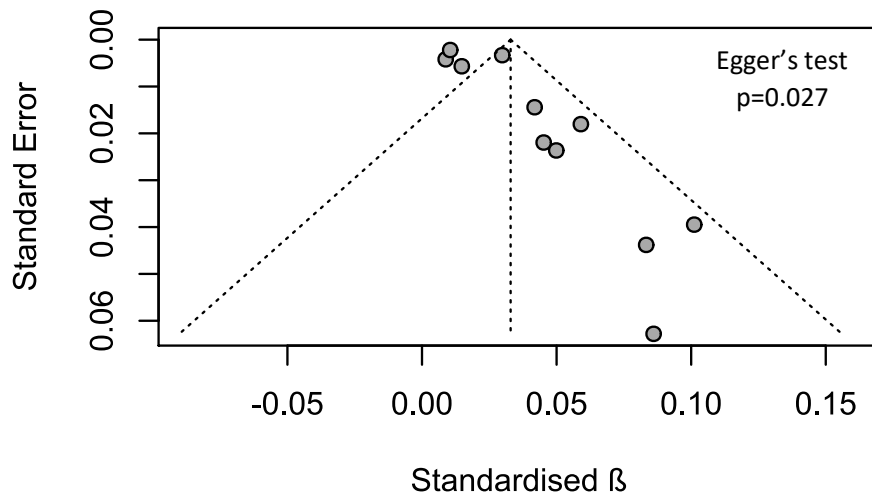

Supplement: EMS182208-supplement-Online_supplement.pdf [file EMS182208-supplement-Online_supplement.pdf]
